# Supplementary material for: The Potential Diagnostic Value of Immune-Related Genes in Interstitial Fibrosis and Tubular Atrophy after Kidney Transplantation
Source: Hindawi journal article supplement (doi:10.1155/2022/7212852), 2022-06-17

aDC

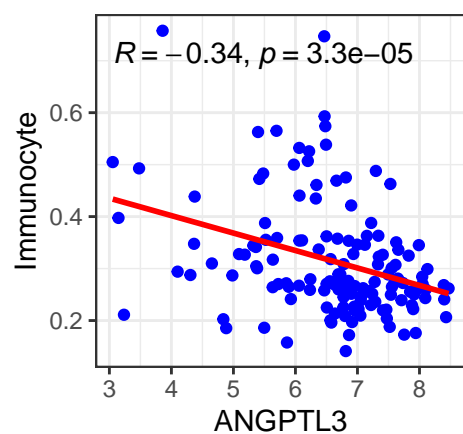

B cells

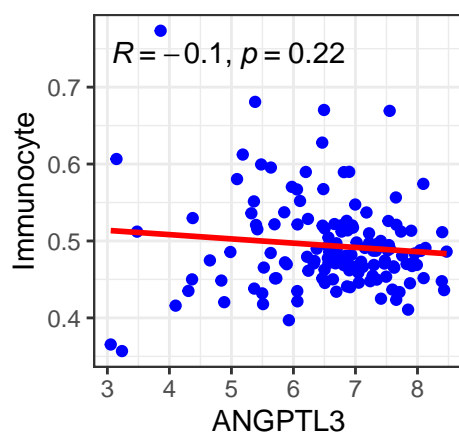

CD8 T cells

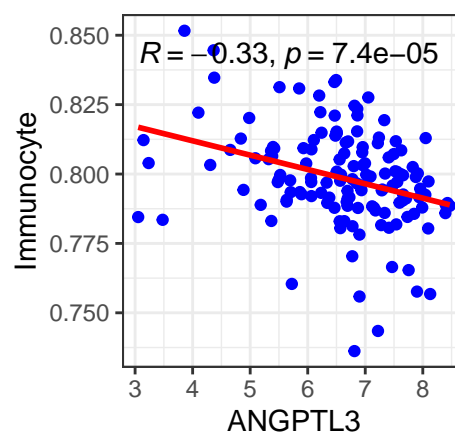

Cytotoxic cells

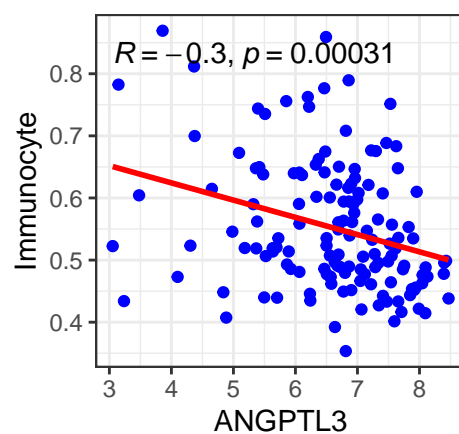

DC

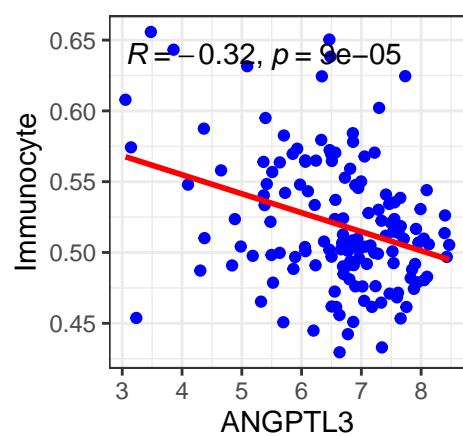

Eosinophils

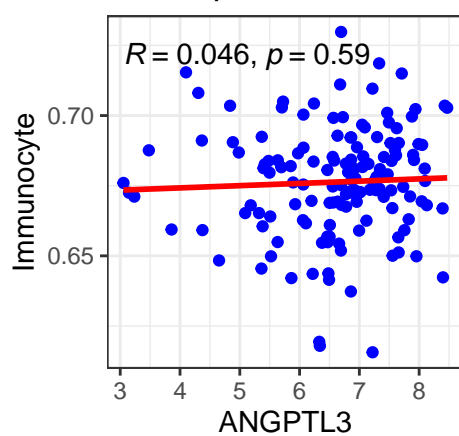

iDC

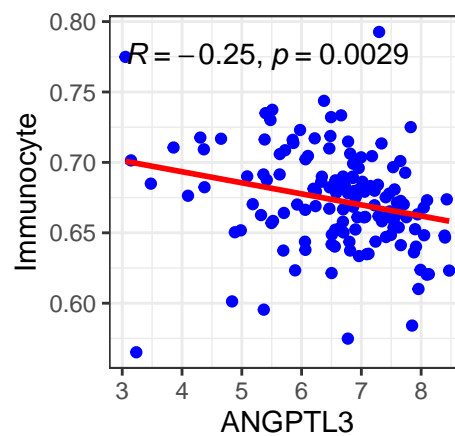

Mast cells

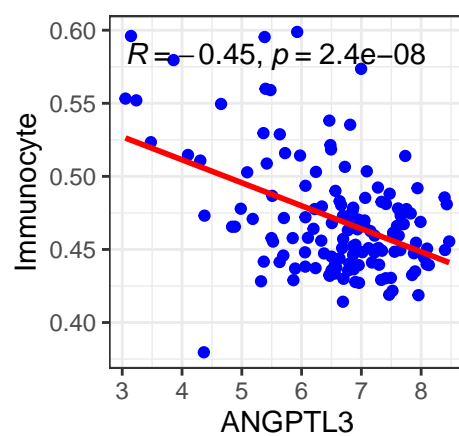

NK CD56bright cells

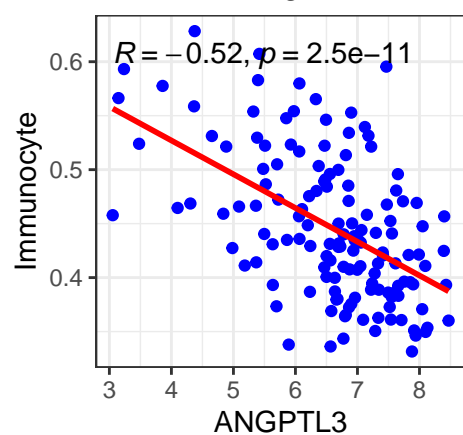

NK CD56dim cells

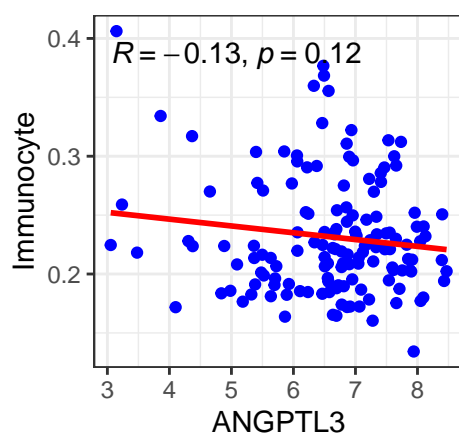

NK cells

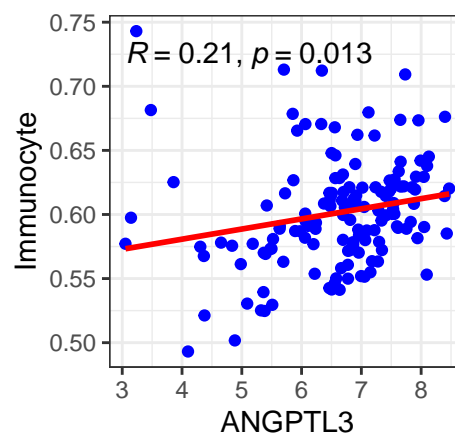

pDC

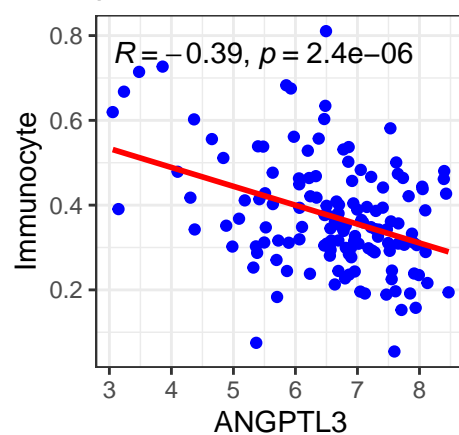

T cells

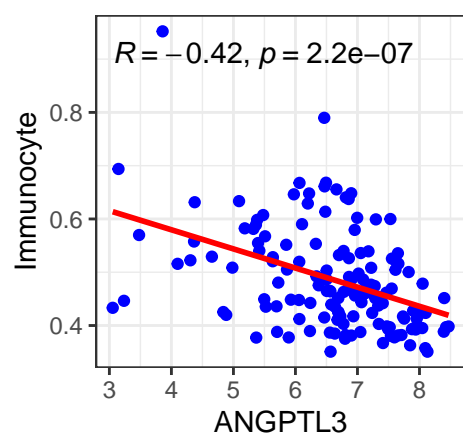

Tem

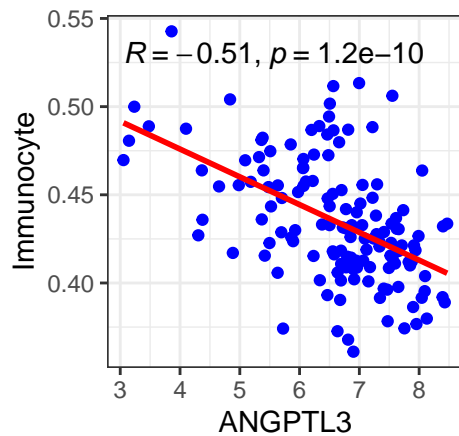

Tgd

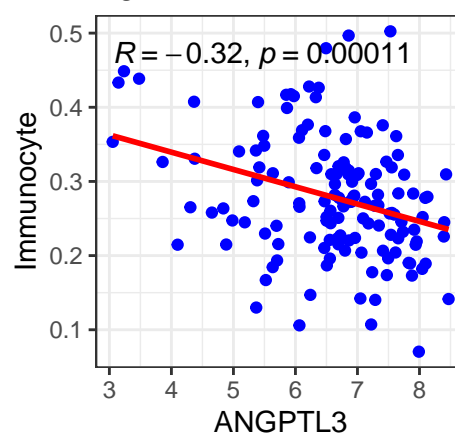

Th1 cells

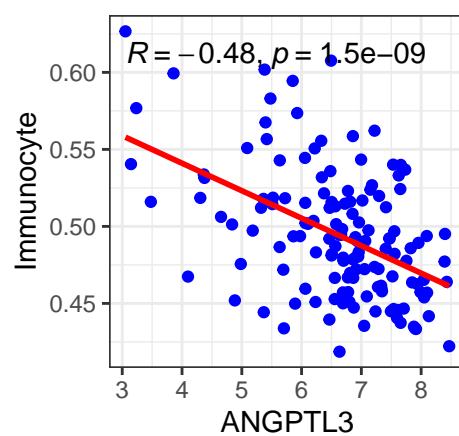

Th2 cells

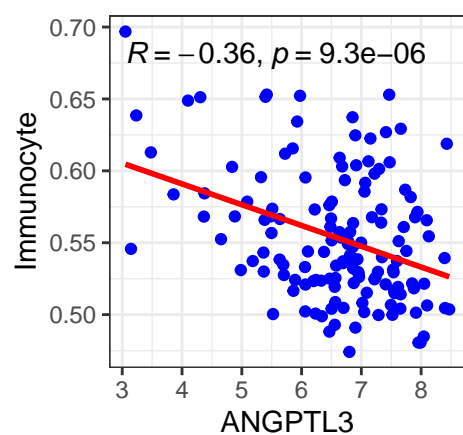

TReg

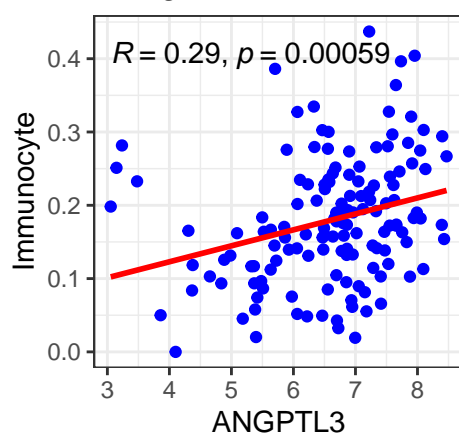

Supplement: f1 [file 7212852.f1.zip]
