# Supplementary material for: The Potential Diagnostic Value of Immune-Related Genes in Interstitial Fibrosis and Tubular Atrophy after Kidney Transplantation
Source: Hindawi journal article supplement (doi:10.1155/2022/7212852), 2022-06-17

Supplementary figure 1: KEGG enrichment plot

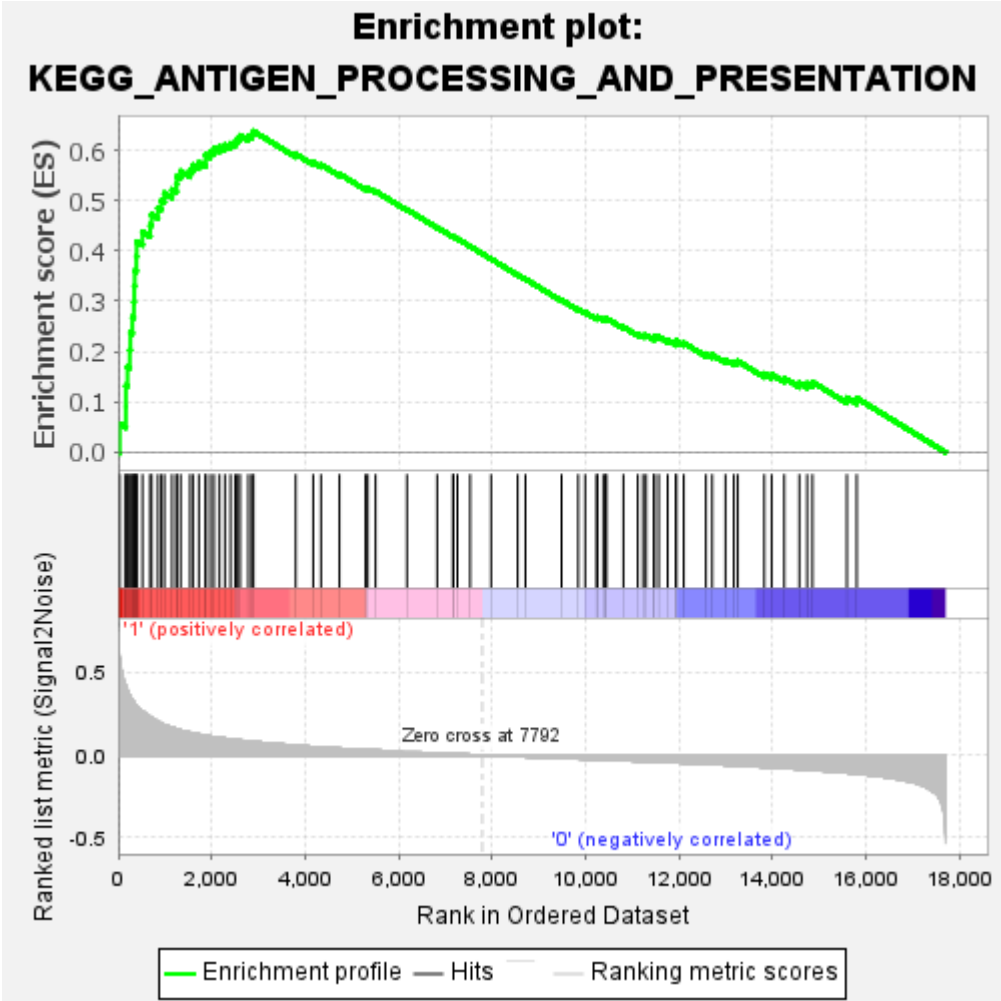

Enrichment plot:  
KEGG\_AUTOIMMUNE\_THYROID\_DISEASE

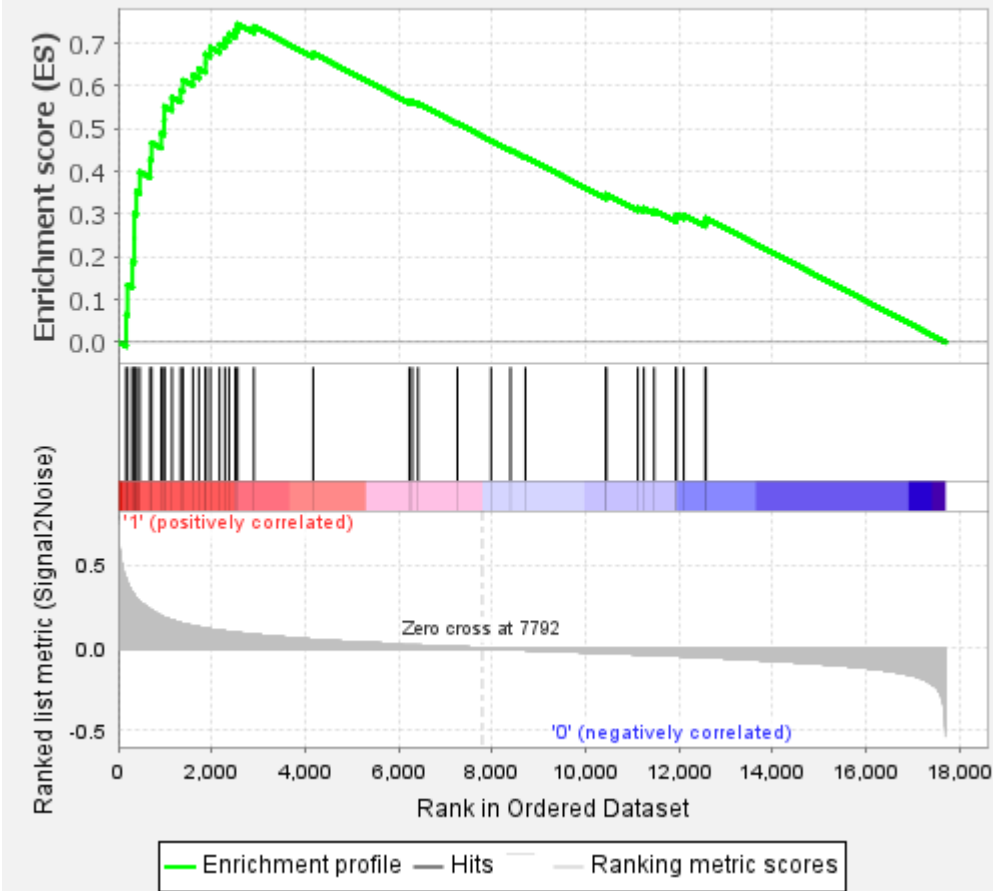

# Enrichment plot: KEGG\_B\_CELL\_RECEPTOR\_SIGNALING\_PATHWAY

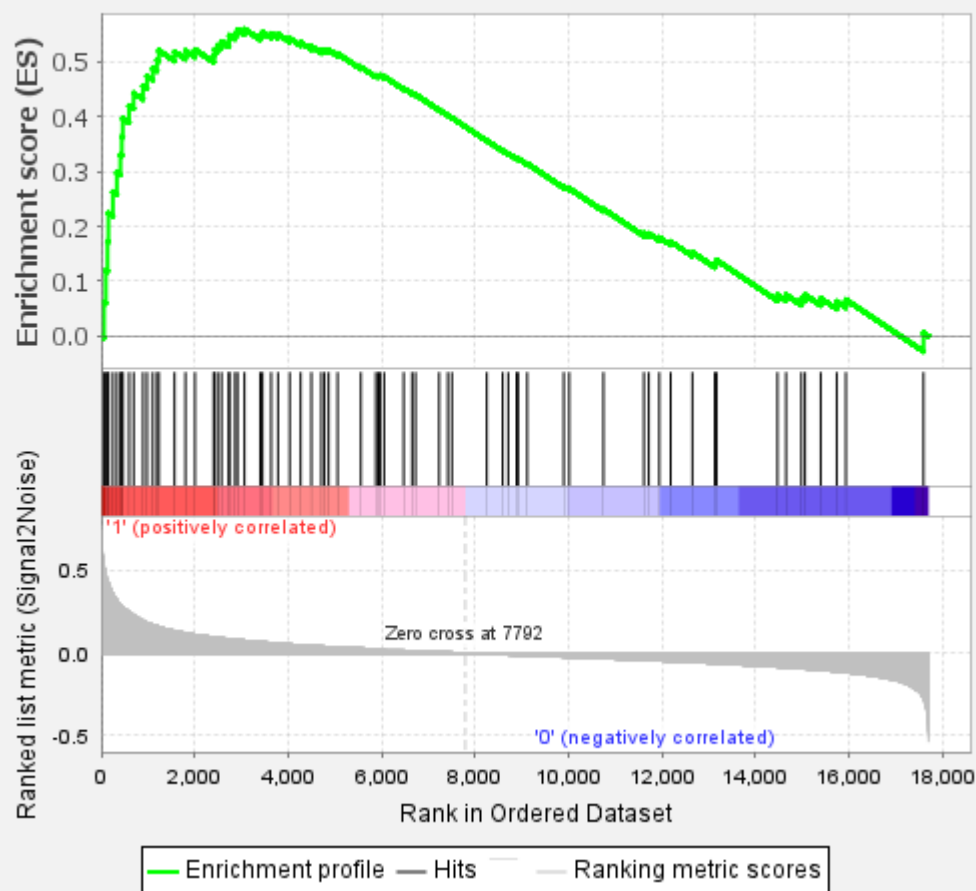

**Enrichment plot:**  
**KEGG\_CELL\_ADHESION\_MOLECULES\_CAMS**

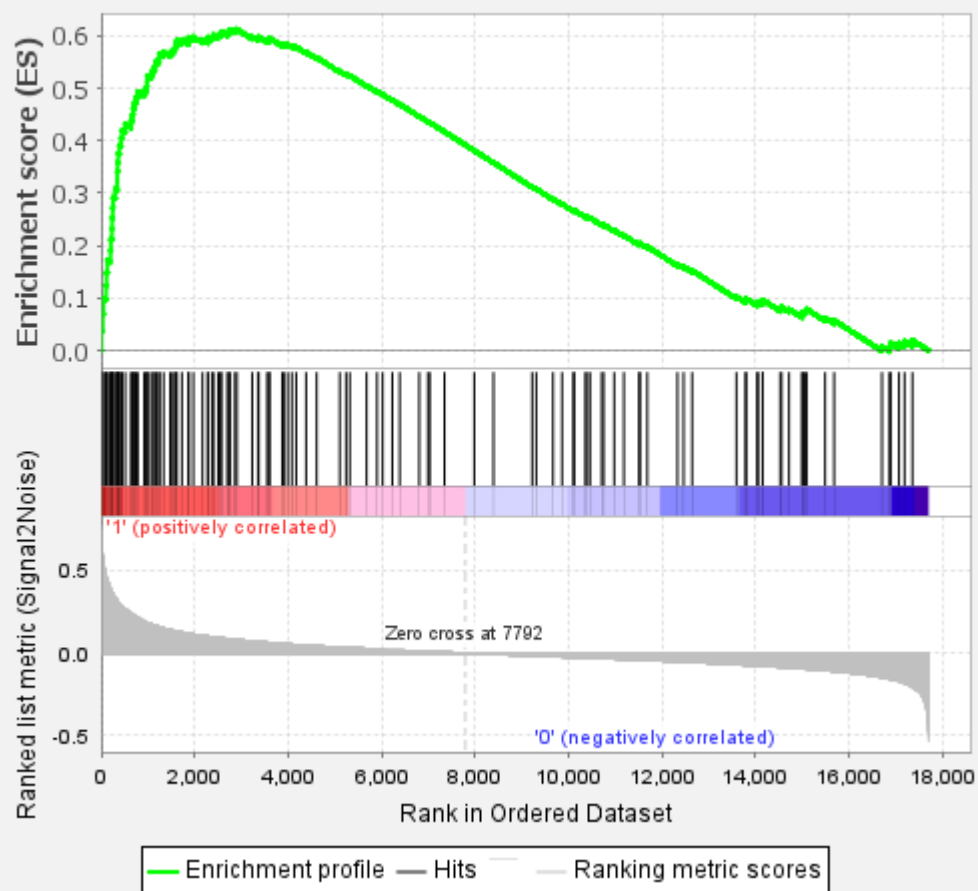

**Enrichment plot:**  
**KEGG\_CHEMOKINE\_SIGNALING\_PATHWAY**

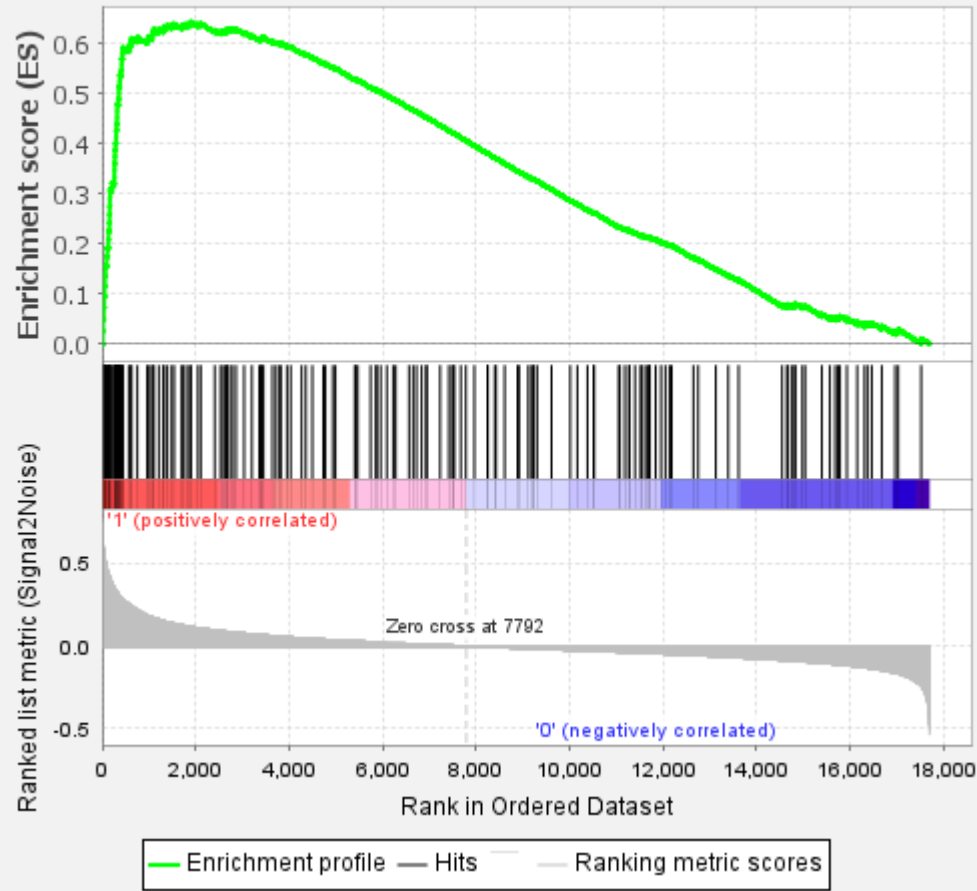

# Enrichment plot: KEGG\_CYTOKINE\_CYTOKINE\_RECEPTOR\_INTERACTIO N

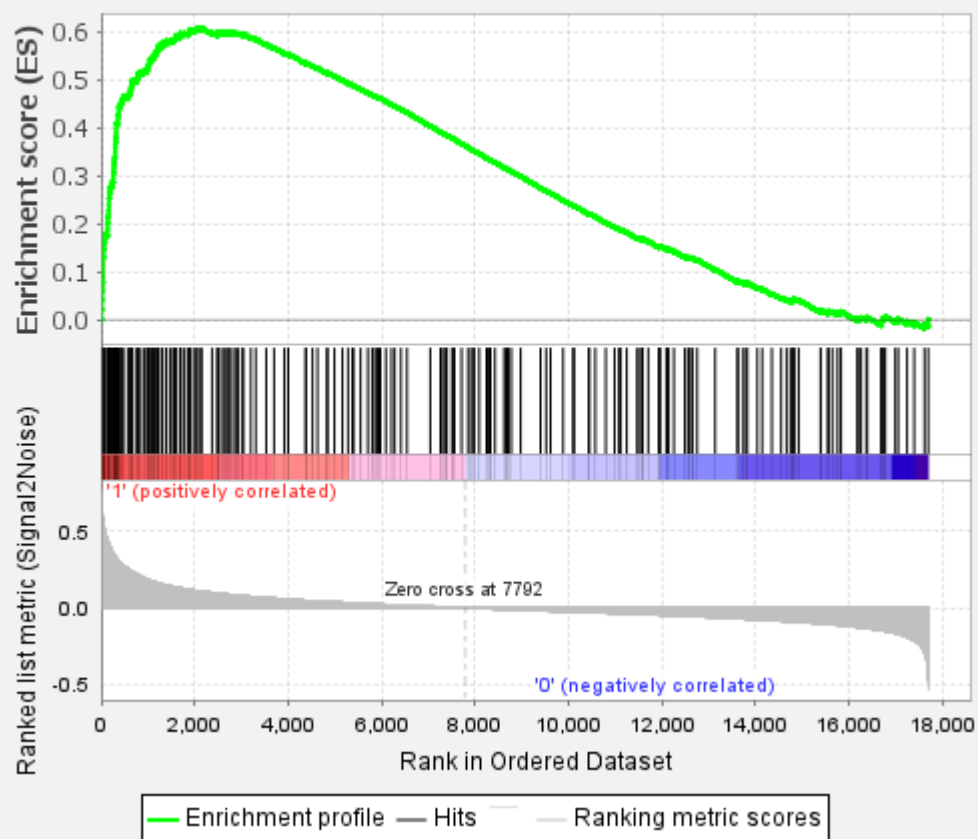

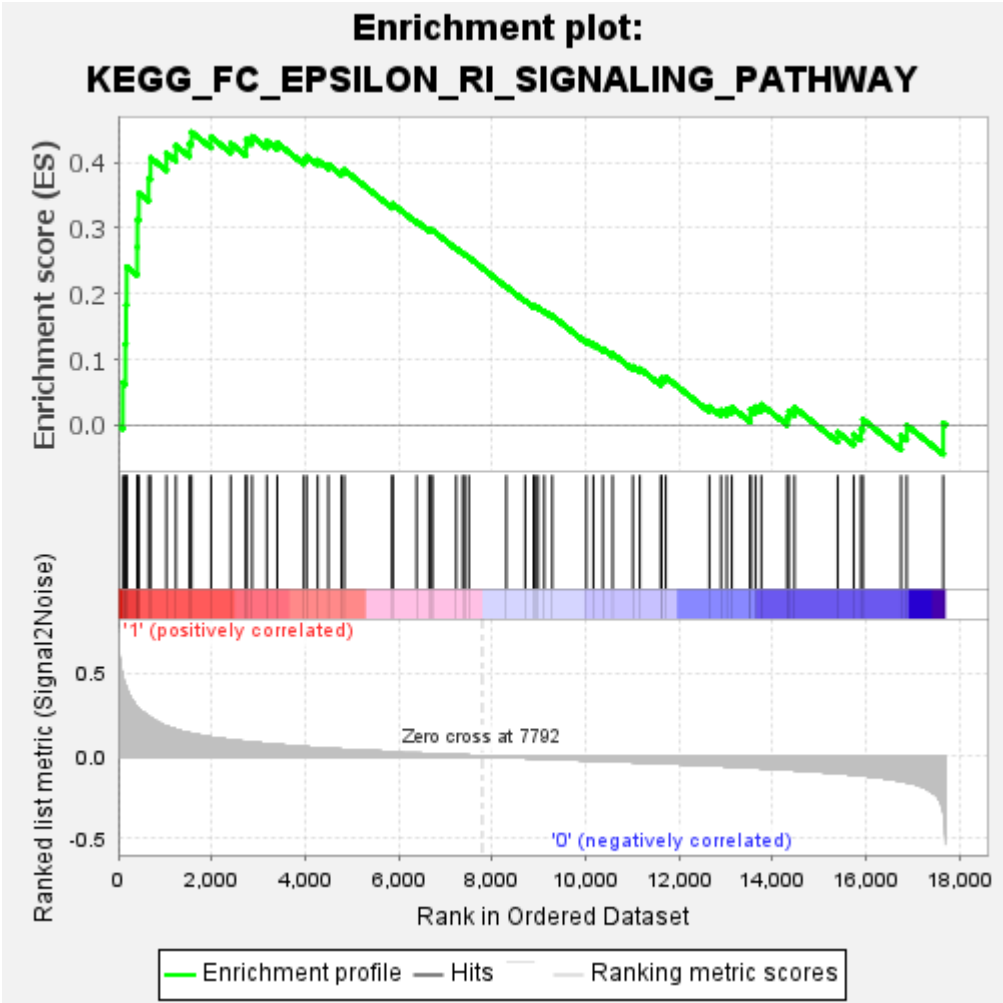

**Enrichment plot:**  
**KEGG\_FC\_GAMMA\_R\_MEDIATED\_PHAGOCYTOSIS**

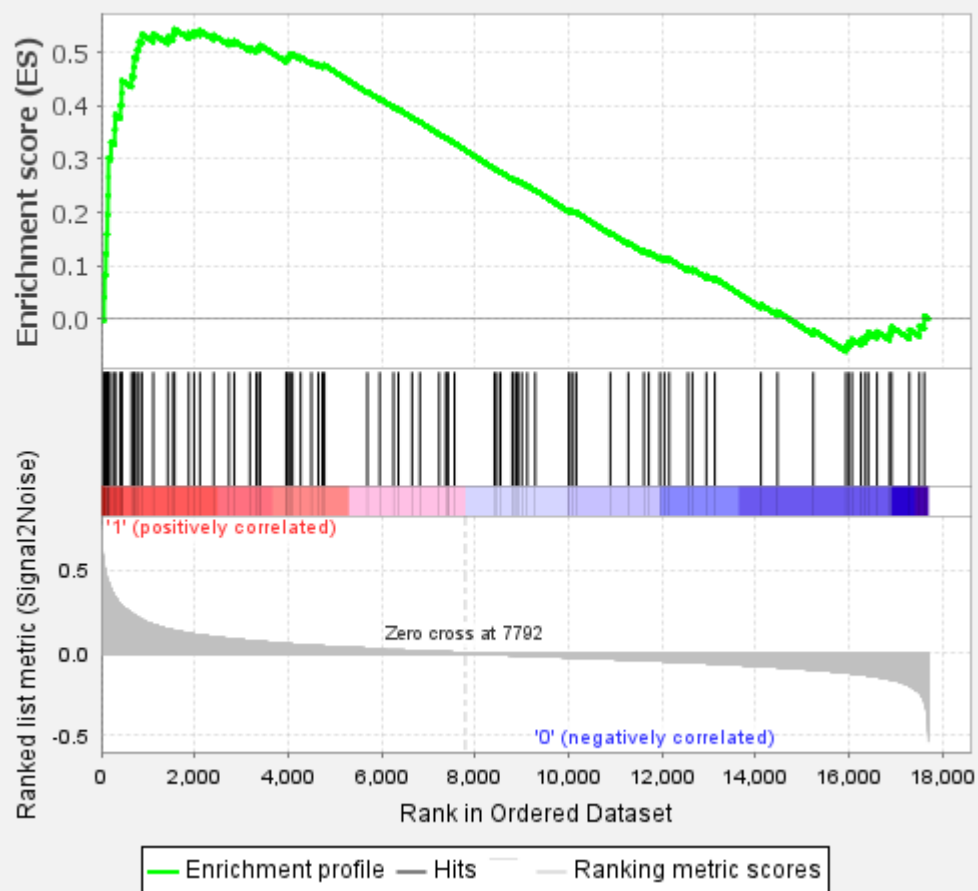



# Enrichment plot: KEGG\_GRAFT\_VERSUS\_HOST\_DISEASE

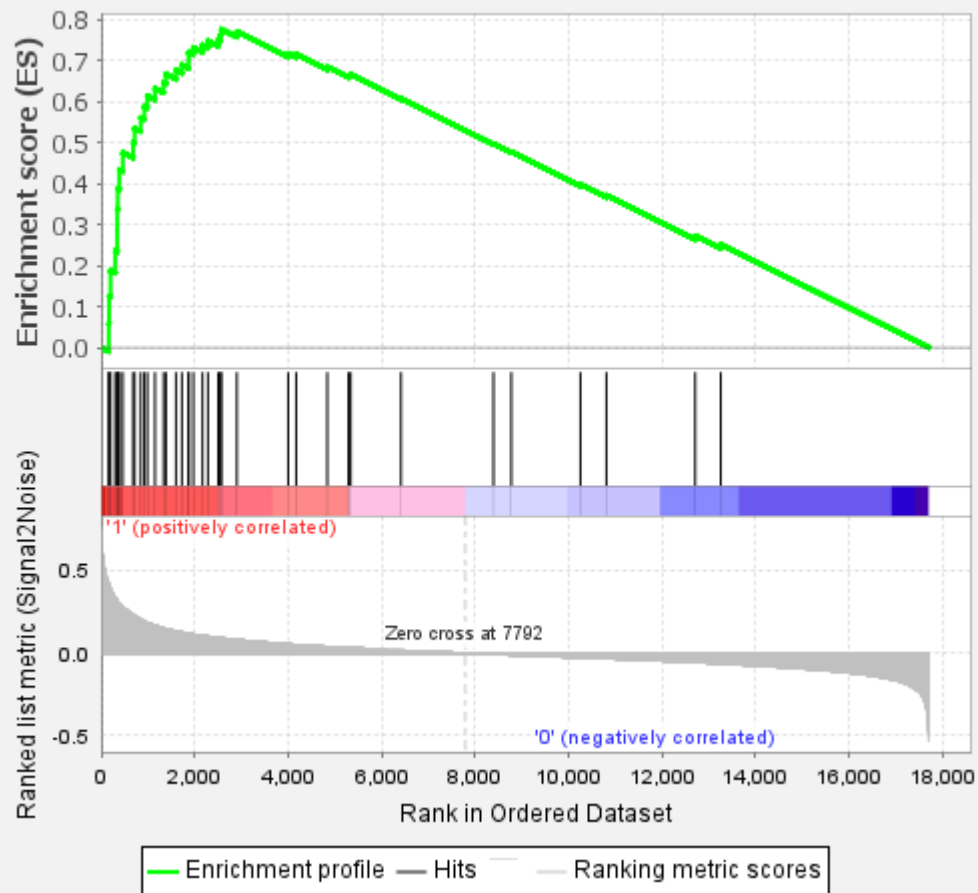

**Enrichment plot:**  
**KEGG\_JAK\_STAT\_SIGNALING\_PATHWAY**

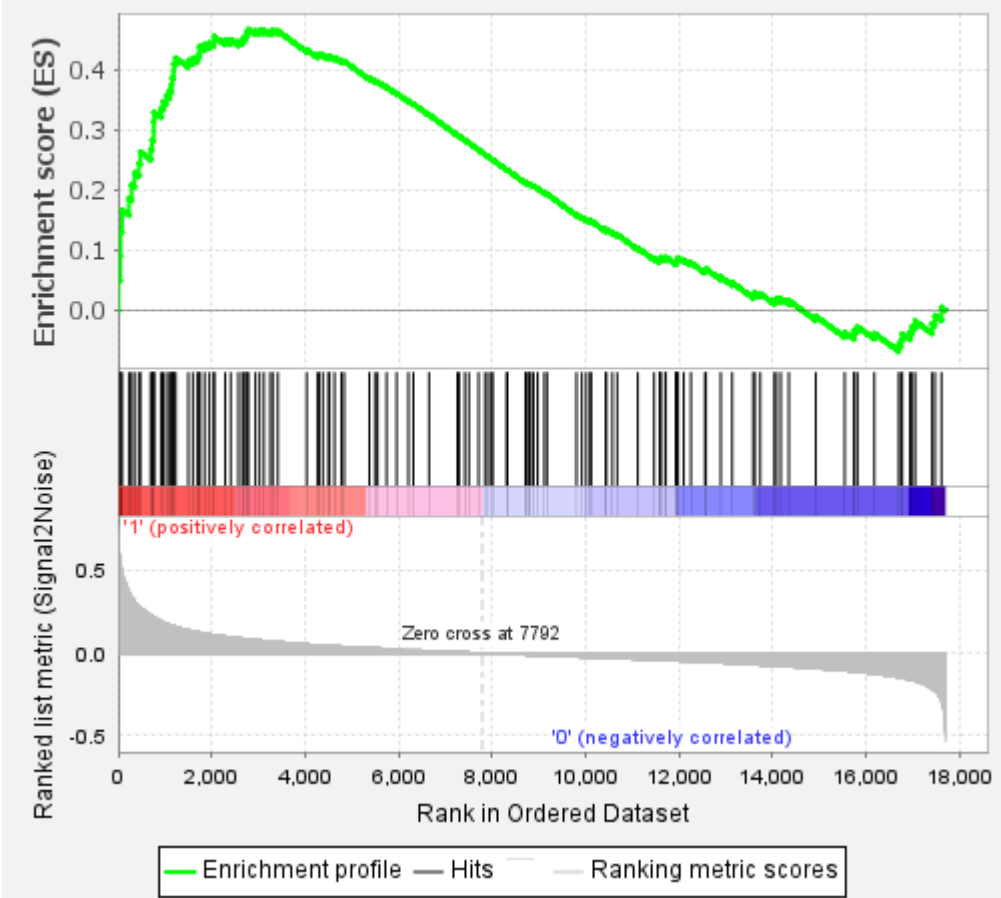

# Enrichment plot: KEGG\_MAPK\_SIGNALING\_PATHWAY

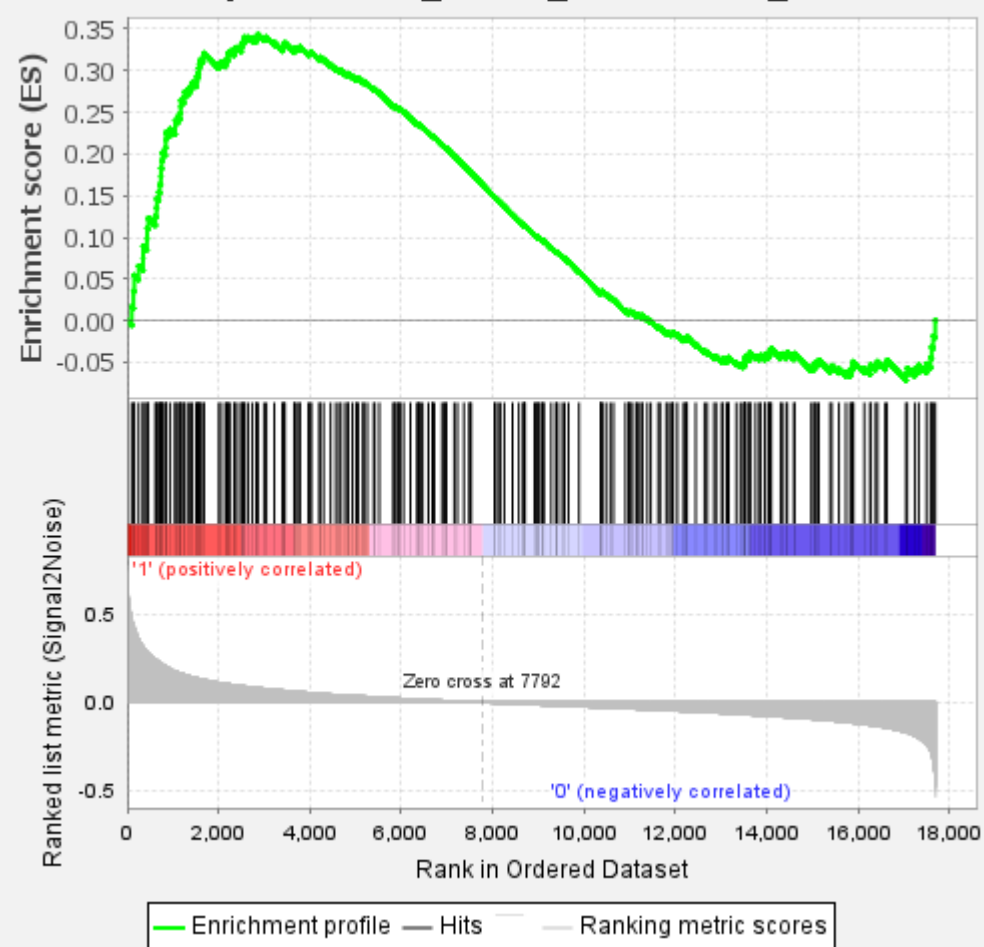

# Enrichment plot: KEGG\_NATURAL\_KILLER\_CELL\_MEDIATED\_CYTOTOXI CITY

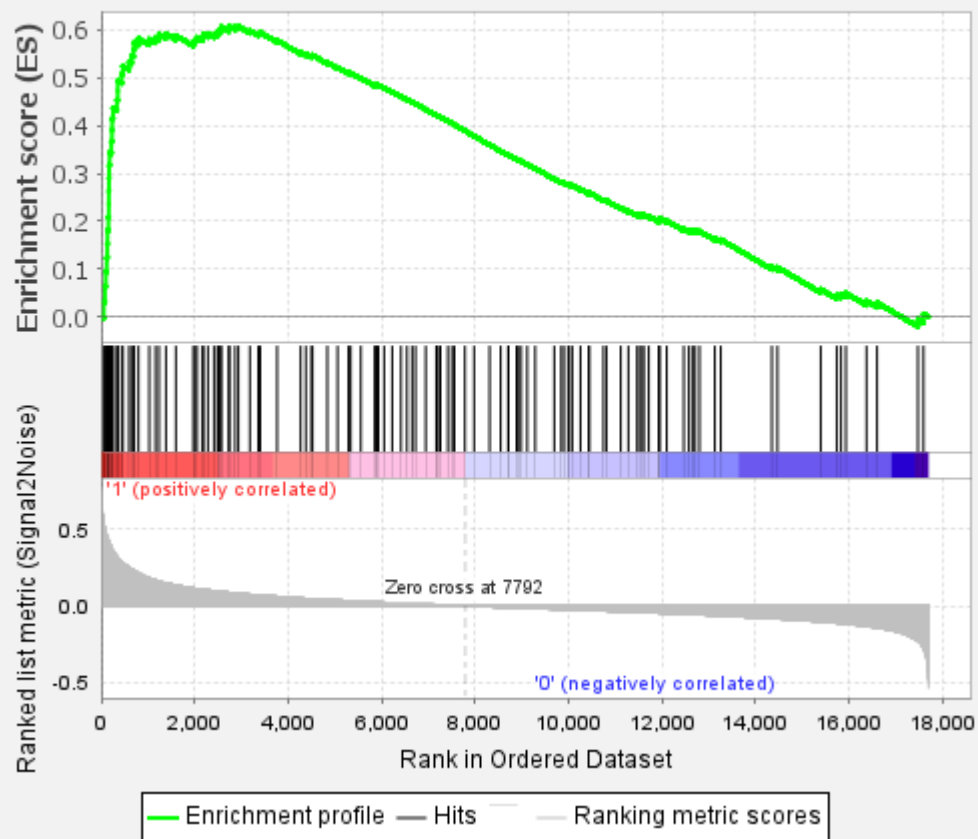

# Enrichment plot: KEGG\_NOD LIKE\_RECEPTOR\_SIGNALING\_PATHWAY

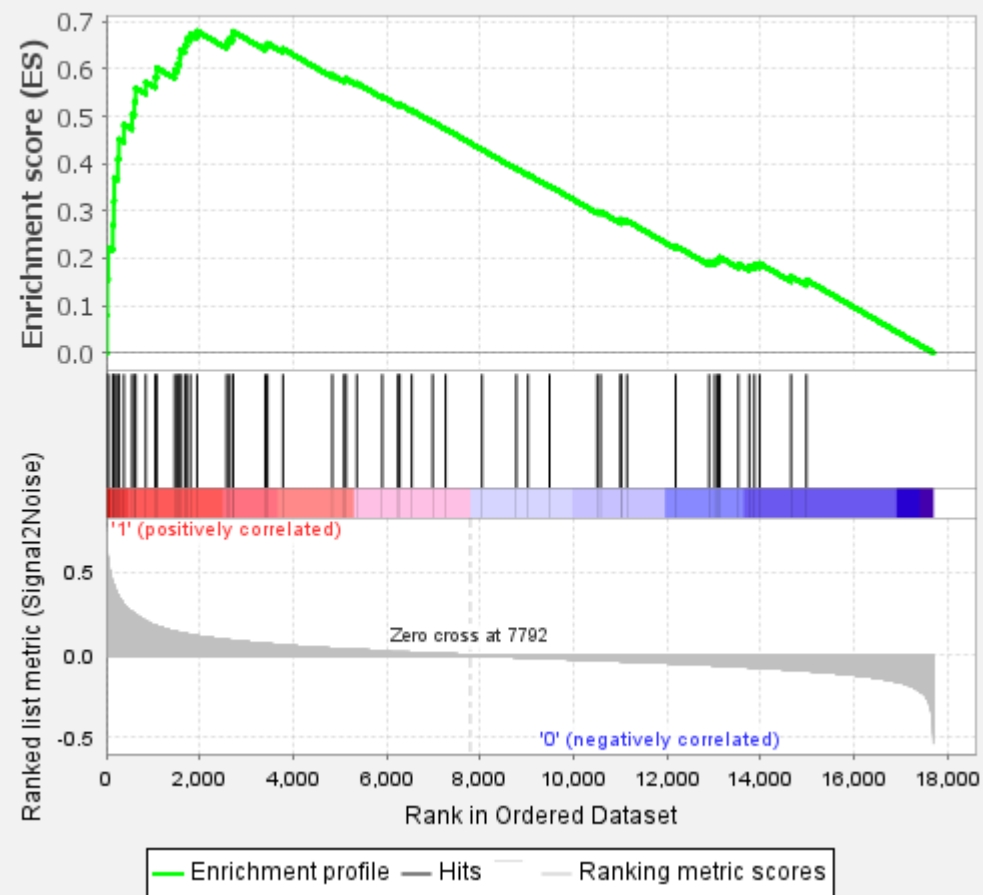

# Enrichment plot: KEGG\_PRIMARY\_IMMUNODEFICIENCY

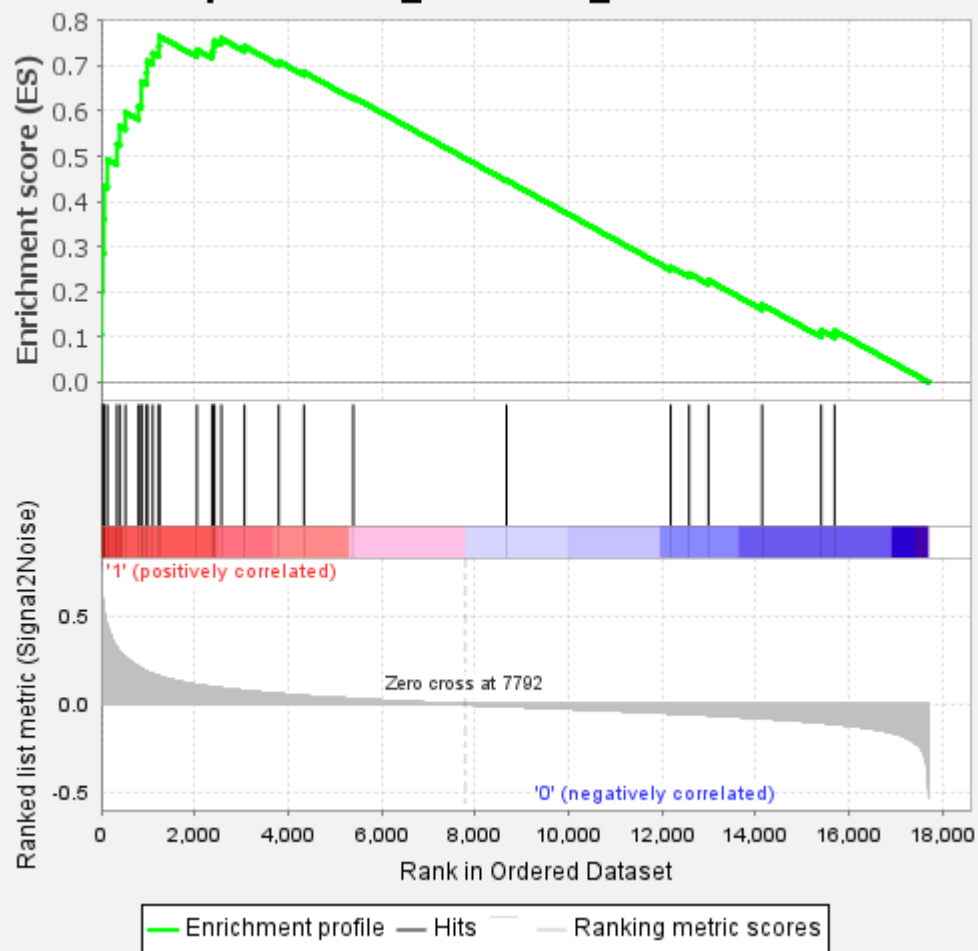

# Enrichment plot: KEGG\_T\_CELL\_RECEPTOR\_SIGNALING\_PATHWAY

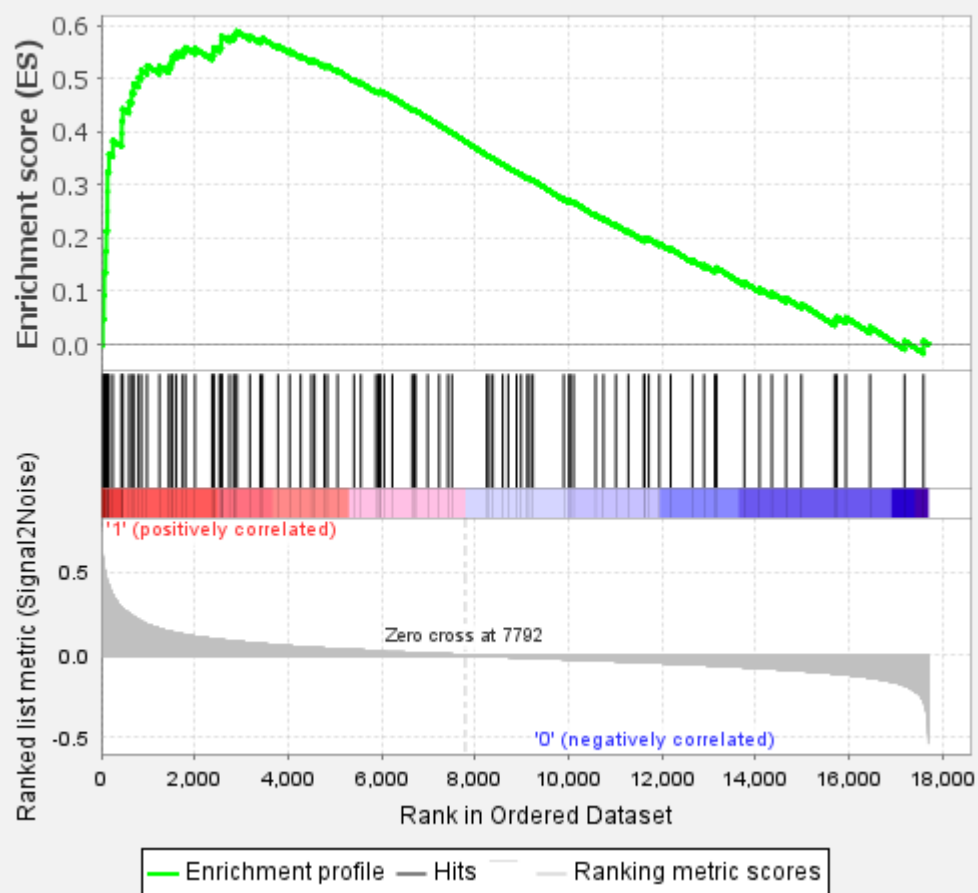

# Enrichment plot: KEGG\_TOLL\_LIKE\_RECEPTOR\_SIGNALING\_PATHWAY

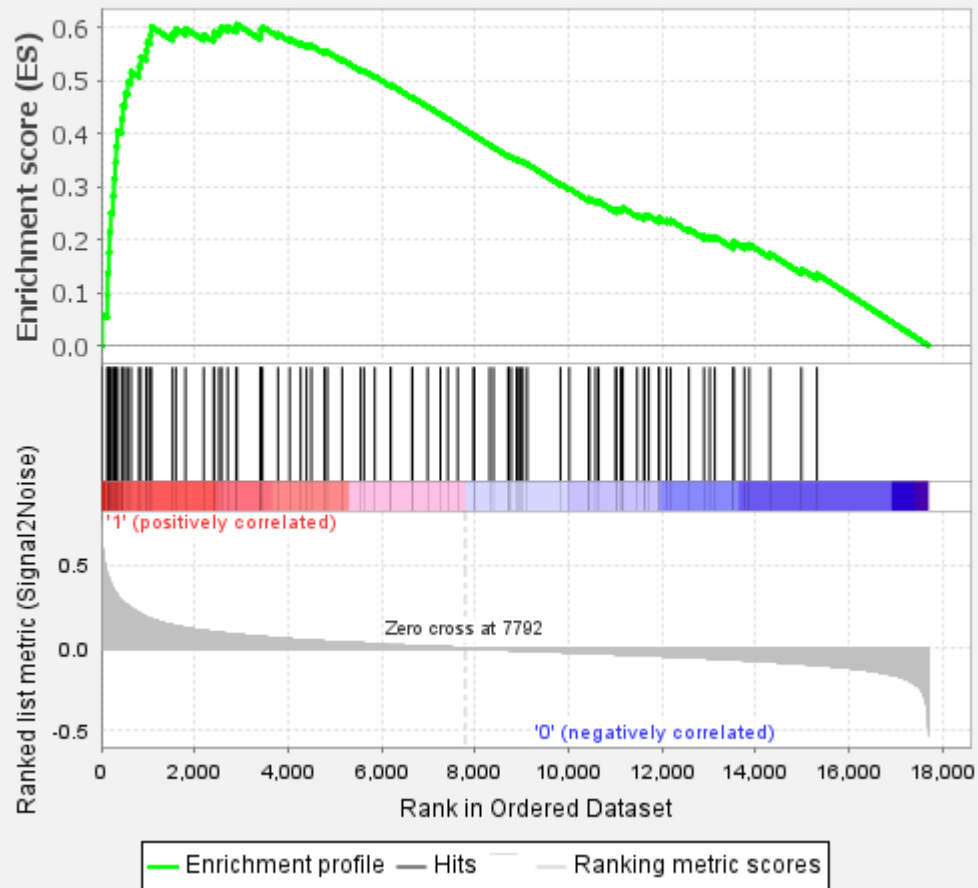



# Enrichment plot: KEGG\_ALLOGRAFT\_REJECTION

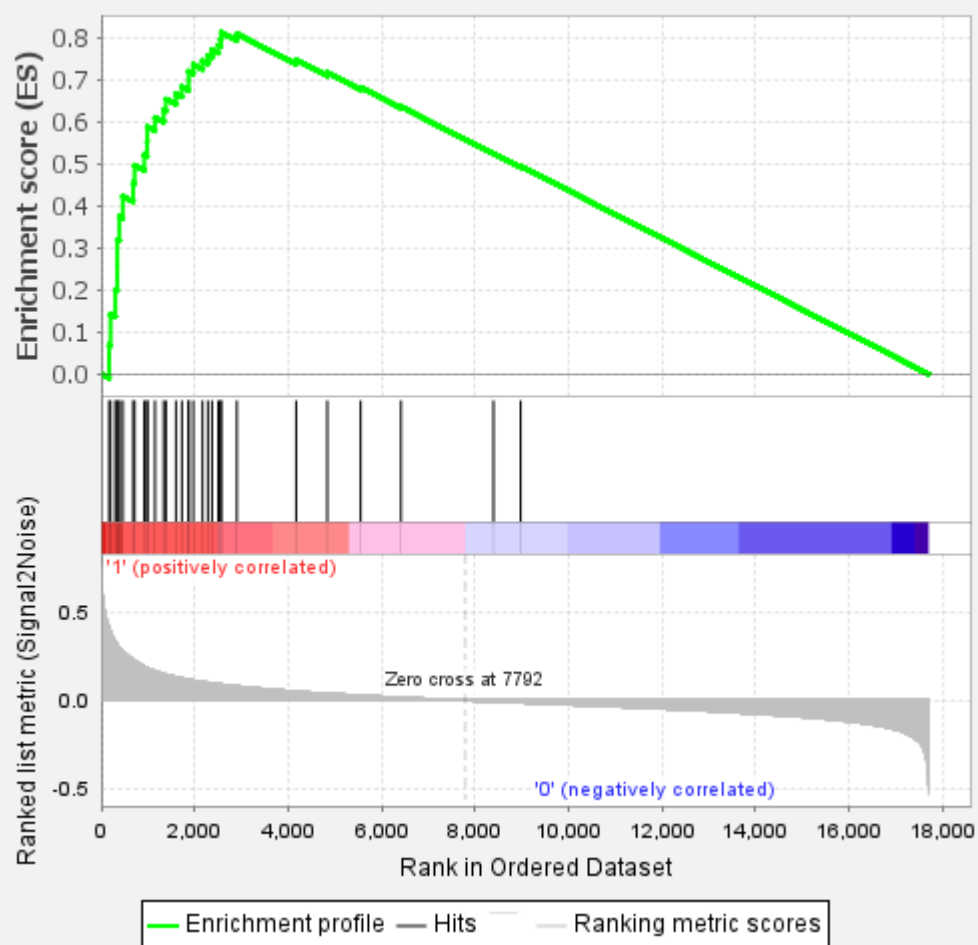

# Enrichment plot: KEGG\_GRAFT\_VERSUS\_HOST\_DISEASE



# Enrichment plot: KEGG\_PATHWAYS\_IN\_CANCER

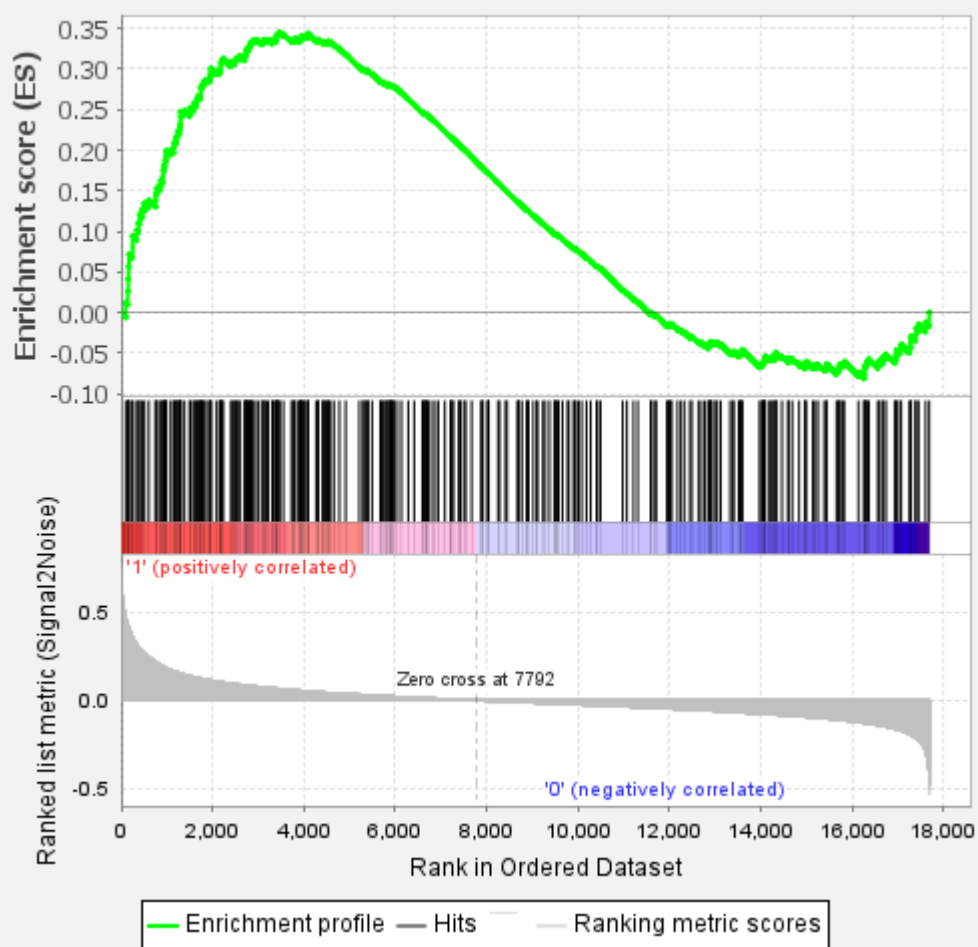

Supplement: f1 [file 7212852.f1.zip]
