# Supplementary material for: The Potential Diagnostic Value of Immune-Related Genes in Interstitial Fibrosis and Tubular Atrophy after Kidney Transplantation
Source: Hindawi journal article supplement (doi:10.1155/2022/7212852), 2022-06-17
Supplement: f1 [file 7212852.f1.zip]

| Category    | p-value   | Molecules                                                                        |
|-------------|-----------|----------------------------------------------------------------------------------|
| Cellular Mr | 1.39E-32  | ACKR1, AGR2, ALB, ANGPTL3, APOH, ARL4C, ARPC1B, C3, CCL19, CCL4, CCL5, CCN       |
| Immune C    | 1.39E-32  | ACKR1, ALB, APOH, C3, CCL19, CCL4, CCL5, CCN1, CD1C, CD2, CD69, CD8A, CORO1      |
| Inflammato  | 7.75E-30  | ACKR1, AGR2, ALB, APOH, ARHGAP9, BIRC3, C1QB, C1QC, C3, CCL19, CCL4, CCL5, C     |
| Organisma   | 7.75E-30  | ACKR1, ADGRV1, AFM, AGR2, AGR3, ALB, APOH, ARHGAP9, ARL4C, ARPC1B, BIRC          |
| Gastrointe  | 9.41E-26  | ACKR1, AGR2, ALB, APOH, BIRC3, C1orf162, C3, CCL19, CCL4, CCL5, CCN1, CD3D, C    |
| Hematolog   | 5.13E-25  | ACKR1, AGR2, ALB, APOH, BIRC3, C1QC, C3, CCL19, CCL4, CCL5, CCN1, CD1C, CD2, (   |
| Tissue Mor  | 5.13E-25  | AGR2, BIRC3, C3, CCL19, CCL4, CCL5, CD3D, CD69, CD8A, CORO1A, CP, CSF2RB, CT     |
| Immunolo    | 5.57E-24  | ADGRV1, ALB, APOH, ARL4C, ARPC1B, BIRC3, C1orf162, C1QB, C1QC, C3, CCL19, C      |
| Cellular De | 2.68E-23  | ALB, APOH, BIRC3, C1QC, C3, CCL19, CCL4, CCL5, CCN1, CD2, CD3D, CD69, CD8A, C    |
| Cellular Gr | 2.68E-23  | ALB, APOH, BIRC3, C1QC, C3, CCL19, CCL4, CCL5, CCN1, CD2, CD3D, CD52, CD69, C    |
| Lymphoid    | 2.68E-23  | AGR2, ALB, APOH, BIRC3, C1QC, C3, CCL19, CCL4, CCL5, CCN1, CD2, CD3D, CD69, C    |
| Endocrine   | 1.63E-22  | ADGRV1, AFM, AGR2, AGR3, ALB, APOH, ARL4C, C16orf54, C1orf162, C3, CCL19, CC     |
| Metabolic   | 1.63E-22  | AFM, ALB, C1orf162, C3, CCL19, CCL4, CCL5, CCN1, CD3D, CD52, CP, CSF2RB, CST7,   |
| Cell-To-C   | 1.84E-19  | ACKR1, ALB, ANGPTL3, APOH, BIRC3, C3, CCL19, CCL4, CCL5, CCN1, CD1C, CD2, CD     |
| Inflammato  | 2.32E-18  | ACKR1, AGR2, ALB, APOH, ARL4C, BIRC3, C1QB, C3, CCL19, CCL4, CCL5, CCN1, CD1     |
| Cellular Fu | 2.87E-18  | ACKR1, ALB, APOH, BIRC3, C3, CCL19, CCL4, CCL5, CCN1, CD2, CD3D, CD52, CD69, C   |
| Connective  | 1.21E-17  | ALB, APOH, C1QB, C3, CCL19, CCL4, CCL5, CD1C, CD3D, CD52, CD69, CSF2RB, CTSS     |
| Skeletal an | 1.21E-17  | AFM, ALB, APOH, C1QB, C3, CCL19, CCL4, CCL5, CD1C, CD3D, CD52, CD69, CP, CSF2    |
| Cell Death  | 1.64E-17  | AGR2, ALB, BIRC3, C3, CCL19, CCL4, CCL5, CCN1, CD2, CD52, CD53, CD69, CD8A, CC   |
| Hematopo    | 8.97E-16  | C1QC, CCL19, CCL5, CCN1, CD2, CD3D, CD69, CD8A, CSF2RB, CTSV, CXCL1, CXCL1       |
| Tissue Dev  | 8.97E-16  | C1QC, C3, CCL19, CCL5, CCN1, CD2, CD3D, CD69, CD8A, CSF2RB, CTSV, CXCL1, CX      |
| Infectious  | 12.48E-15 | ALB, APOH, ARL4C, ARPC1B, BIRC3, C3, CCL4, CCL5, CD3D, CD69, CD8A, CSF2RB, C     |
| Humoral Ir  | 2.68E-15  | C1QB, C1QC, C3, CCL19, CD69, CSF2RB, CTSS, CXCL10, DOCK2, FCER1G, FCGR2B, C      |
| Cellular Co | 6.2E-15   | ALB, APOH, ARHGAP9, C3, CCL4, CCL5, CD2, CD53, CD69, CORO1A, CTSS, CXCL1, C      |
| Digestive   | 5.165E-14 | ACKR1, ALB, BIRC3, C3, CCL4, CCL5, CCN1, CSF2RB, CXCL1, CXCL10, CXCL11, CXCL     |
| Hepatic Sy  | 1.65E-14  | ACKR1, ALB, BIRC3, C3, CCL4, CCL5, CCN1, CSF2RB, CXCL1, CXCL10, CXCL11, CXCL     |
| Organ Dev   | 1.65E-14  | ACKR1, ALB, BIRC3, C3, CCL19, CCL4, CCL5, CCN1, CD2, CD3D, CD69, CD8A, CSF2RE    |
| Antimicrob  | 1.71E-14  | BIRC3, CCL19, CCL4, CCL5, CD8A, CXCL10, FCER1G, GZMA, IGKV3-20, IL10RA, ISG2     |
| Hypersensi  | 2.97E-14  | ALB, C3, CCL19, CCL4, CCL5, CD2, CXCL10, CXCL11, CXCL2, CXCL9, LTF, RAC2, SPON   |
| Hepatic Sy  | 5.95E-14  | ACKR1, ALB, BIRC3, C3, CCL4, CCL5, CCN1, CSF2RB, CXCL1, CXCL10, CXCL11, CXCL     |
| Ophthalmi   | 7.86E-14  | C3, CCL19, CCL4, CCL5, CD69, CXCL10, CXCL6, EGF, KLRB1, STAT4, TIMP1, TNFRSF1    |
| Cell Signa  | 4.93E-13  | ACKR1, ALB, C3, CCL19, CCL4, CCL5, CD2, CD8A, CSF2RB, CXCL1, CXCL10, CXCL11, C   |
| Molecular   | 4.93E-13  | ACKR1, ALB, C3, CCL19, CCL4, CCL5, CD2, CD8A, CP, CXCL1, CXCL10, CXCL11, CXCL    |
| Vitamin an  | 4.93E-13  | ACKR1, ALB, C3, CCL19, CCL4, CCL5, CD2, CD8A, CXCL1, CXCL10, CXCL11, CXCL2, C    |
| Cell-medic  | 5.73E-12  | ACKR1, C3, CCL19, CCL4, CCL5, CCN1, CD2, CD3D, CD69, CD8A, CORO1A, CTSS, CT      |
| Hematolog   | 7.12E-12  | ACKR1, ADGRV1, ALB, ARHGAP9, ARPC1B, BIRC3, C3, CCL19, CCL4, CCL5, CCN1, C       |
| Respirator  | 8.21E-12  | ACKR1, ALB, APOH, ARL4C, C3, CCL4, CCL5, CD2, CD69, CD8A, CSF2RB, CTSS, CXCL     |
| Embryonic   | 1.95E-11  | CCL19, CCL5, CCN1, CD2, CD3D, CD69, CD8A, CTSV, CXCL1, CXCL10, DOCK2, ELF3,      |
| Organisma   | 1.95E-11  | AGR2, ALB, ANGPTL3, C3, CCL19, CCL5, CCN1, CD2, CD3D, CD69, CD8A, CP, CSF2RE     |
| Dermatolo   | 2.66E-10  | ARPC1B, C3, CCL4, CCL5, CD2, CSF2RB, CSTA, CTSS, CTSV, CXCL1, CXCL10, CXCL11     |
| Cancer      | 2.82E-10  | ACKR1, ADGRV1, AFM, AGR2, AGR3, ALB, APOH, ARHGAP9, ARL4C, BIRC3, C16orf         |
| Cardiovasc  | 3.03E-10  | ALB, APOH, ARL4C, C3, CCL5, CD52, CD53, CSF2RB, CTSS, CXCL10, CYTIP, EVI2A, EV   |
| Hereditary  | 7.76E-10  | ALB, C1QB, C1QC, C3, CD3D, CD8A, CORO1A, CP, DOCK2, G6PC, IGKC, IGLL1/IGLL       |
| Organisma   | 2.05E-09  | ADGRV1, AGR2, APOH, BIRC3, C3, CCN1, CD2, CD8A, CPA3, CSF2RB, CTSV, CXCL10       |
| Skeletal an | 1.02E-08  | ACKR1, CCL5, CCN1, CTSV, CXCL1, CXCL11, CXCL2, EGF, MMP7, SERPINA3, TFPI2, T     |
| Protein Syr | 6.88E-08  | ALB, C3, CCN1, CD69, CP, CSF2RB, CTSS, CXCL10, FCER1G, FCGR2B, IGKC, IGLL1/IG    |
| Neurologic  | 7.93E-08  | AFM, ALB, C3, CCL4, CCL5, CCN1, CD52, CD8A, CORO1A, CP, CSF2RB, CTSS, CXCL1,     |
| Reproduct   | 2.76E-07  | ACKR1, ADGRV1, AFM, AGR2, AGR3, ALB, APOH, ARL4C, C16orf54, C3, CCL19, CCL       |
| Cell Morph  | 5.7E-07   | C3, CCL19, CCL4, CCL5, CD8A, CP, CPA3, CTSS, CXCL10, CXCL11, CXCL9, CYTIP, DO    |
| Cardiovasc  | 6.65E-07  | ACKR1, ANGPTL3, C3, CCL4, CCL5, CCN1, CSF2RB, CXCL1, CXCL10, CXCL11, CXCL2       |
| Free Radic  | 9.51E-07  | ALB, C3, CCL4, CCL5, CCN1, CD52, CXCL2, CXCL9, DOCK2, EGF, FCGR2B, GZMA, GZ      |
| Developm    | 9.8E-07   | ALB, C1QB, C1QC, C3, CD3D, CP, CYTIP, DOCK2, G6PC, IGKC, IGLL1/IGLL5, IL7R, LTF, |
| Organ Moi   | 9.94E-07  | C3, CD8A, CSF2RB, DOCK2, FCER1G, FCGR2B, HCST, IGKC, IL7R, LCN2, NFKBIZ, NLR     |
| Renal and   | 2.07E-06  | ALB, C3, CP, CTSS, EGF, FGB, LCN2, LYZ, SLC34A2, TIMP1, UBD                      |
| Tumor Mo    | 2.44E-06  | CXCL1, CXCL2, CXCL6                                                              |
| Renal and   | 3.4E-06   | CTSV, CXCL10, CXCL2, CXCL9                                                       |

Carbohydr 3.61E-06-1 APOH,CCL19,CCL5,CSF2RB,CXCL1,CXCL10,CXCL9,EGF,GABBR1,LTF,LY96,PRN  
Small Mole 5.46E-06-8 C3,CCL19,CCL4,CCL5,CXCL10,CXCL11,CXCL9,EGF,FCER1G,HCLS1,LTF,PRNP,P  
Drug Meta 7.41E-06-7 CCL5,CXCL10,EGF,LTF,SFN  
Nucleic Ac 8.46E-06-8 CXCL10,CXCL11,CXCL9  
Cellular As 1.01E-05-1 CCL5,CXCL10,CXCL11,EGF,RASD1,TNFRSF17  
Hair and SI 1.01E-05-2 CCL5,CXCL1,CXCL10,CXCL11,EGF,LTF,SELL,TIMP1  
Post-Trans 1.17E-05-1 CCL4,CCL5,CD2,CD8A,EGF,FCER1G,PTPRC,SELL,SLC12A3

1,CD2,CD69,CD8A,CORO1A,CSF2RB,CTSS,CTSV,CXCL1,CXCL10,CXCL11,CXCL2,CXCL6,CXCL9,CYTIP,  
 LA,CSF2RB,CTSS,CTSV,CXCL1,CXCL10,CXCL11,CXCL2,CXCL6,CXCL9,CYTIP,DOCK2,EGF,FCER1G,FCGR  
 2,CD1C,CD2,CD3D,CD53,CD69,CD8A,CORO1A,CPA3,CSF2RB,CTSS,CTSV,CXCL1,CXCL10,CXCL11  
 3,C16orf54,C1orf162,C1QB,C1QC,C3,CCL19,CCL4,CCL5,CCN1,CD1C,CD2,CD3D,CD52,CD53,CD69,CD  
 52,CD53,CD69,CD8A,CORO1A,CP,CPA3,CSF2RB,CTSS,CTSV,CXCL1,CXCL10,CXCL11,CXCL2,CXCL6,  
 CD3D,CD52,CD69,CD8A,CORO1A,CSF2RB,CTSS,CTSV,CXCL1,CXCL10,CXCL11,CXCL2,CXCL6,CXCL9,  
 SS,CTSV,CXCL1,CXCL10,CXCL2,CXCL6,CYTIP,DOCK2,EGF,FCER1G,FCGR2B,GPR183,HCLS1,HCST,IGK,  
 CL4,CCL5,CCN1,CD1C,CD2,CD3D,CD52,CD53,CD69,CD8A,CORO1A,CP,CPA3,CSF2RB,CTSS,CTSV,CX  
 ORO1A,CSF2RB,CTSV,CXCL1,CXCL10,CXCL11,CXCL2,CYTIP,DOCK2,ELF3,EVI2B,FCER1G,FCGR2B,GP  
 D8A,CORO1A,CSF2RB,CTSV,CXCL1,CXCL10,CXCL11,CXCL2,CYTIP,DOCK2,EGF,ELF3,EVI2B,FCER1G,FC  
 D8A,CORO1A,CSF2RB,CTSS,CTSV,CXCL1,CXCL10,CXCL11,CXCL2,CXCL6,CXCL9,CYTIP,DOCK2,EGF,EL  
 CL4,CCL5,CCN1,CD3D,CD52,CP,CSF2RB,CTSS,CTSV,CXCL1,CXCL10,CXCL11,CXCL9,EGF,ELF3,EVI2A,FC  
 CSTA,CTSS,CTSV,CXCL1,CXCL10,CXCL9,DOCK2,EVI2A,FCER1G,FCGR2B,FXD5,G6PC,GABBR1,GABRP,  
 52,CD69,CD8A,CORO1A,CP,CSF2RB,CTSS,CTSV,CXCL1,CXCL10,CXCL11,CXCL2,CXCL6,CXCL9,CYTIP,  
 C,CD2,CD3D,CD52,CD53,CD69,CD8A,CORO1A,CPA3,CSF2RB,CTSS,CTSV,CXCL1,CXCL10,CXCL11,CX  
 CD8A,CORO1A,CP,CSF2RB,CTSS,CTSV,CXCL1,CXCL10,CXCL2,CXCL6,DOCK2,EGF,ELF3,FCER1G,FCGR  
 ,CXCL1,CXCL10,CXCL11,CXCL2,CXCL6,CXCL9,ELF3,EVI2A,FCER1G,FCGR2B,FGB,GABRP,GZMA,HCLS1  
 RB,CTSS,CXCL1,CXCL10,CXCL11,CXCL2,CXCL6,CXCL9,ELF3,ETNPPL,FCER1G,FCGR2B,FGB,G6PC,GAB  
 ORO1A,CSF2RB,CSTA,CTSS,CTSV,CXCL1,CXCL10,CXCL11,CXCL2,CXCL9,DOCK2,EGF,ELF3,EVI2A,FCER  
 0,CXCL11,CXCL9,DOCK2,ELF3,EVI2B,FCER1G,FCGR2B,GPR183,HCLS1,IGKC,IGLL1/IGLL5,IL10RA,IL7R,  
 CL10,CXCL11,CXCL2,DOCK2,EGF,ELF3,EVI2B,FCER1G,FCGR2B,GPR183,HCLS1,IGKC,IGLL1/IGLL5,IL10F  
 TSS,CTSV,CXCL1,CXCL10,CXCL11,CXCL2,CXCL6,CXCL9,EGF,FCER1G,FCGR2B,GABBR1,GABRP,GZMA,  
 PR183,HCLS1,IGHG2,IGHG3,IGHV1-69,IGHV3-23,IGK,IGKC,IGKV3-20,IGLL1/IGLL5,IGLV1-44,IGLV2-  
 XCL2,DOCK2,EGF,FCER1G,FCGR2B,FGB,G6PC,GPR183,GZMA,HCLS1,HCST,IGHG3,JCHAIN,KLRB1,KLF  
 2,CXCL6,CXCL9,DOCK2,FCGR2B,GABBR1,GABRP,IGKC,IL10RA,IL7R,KLRB1,PTPRC,PYCARD,SELL,STAT  
 2,CXCL6,CXCL9,FCGR2B,GABBR1,GABRP,IL10RA,IL7R,KLRB1,PTPRC,STAT4,TIMP1,XCL1  
 3,CTSV,CXCL1,CXCL10,CXCL11,CXCL2,CXCL6,CXCL9,DOCK2,ELF3,FCER1G,FCGR2B,GABBR1,GABRP,C  
 0,JCHAIN,KLRB1,LCN2,LTF,LYZ,MMP7,MPEG1,PLAC8,PTPRC,PYCARD,RNASE6,SELL,SLPI,SPON2,UBE  
 J2  
 2,CXCL6,CXCL9,EGF,FCGR2B,GABBR1,GABRP,IL7R,KLRB1,PTPRC,PYCARD,SERPING1,STAT4,TIMP1,XC  
 7,TNFSF13B,XCL1  
 CXCL2,CXCL9,EGF,FCER1G,FCGR2B,G6PC,GPR183,HCLS1,IGKC,IL10RA,KLR4-KLRK1/KLRK1,LCN2,LY  
 2,CXCL9,EGF,FCER1G,FCGR2B,G6PC,GPR183,HCLS1,IGKC,KLR4-KLRK1/KLRK1,LCN2,LTF,LYZ,PRNP,  
 XCL9,EGF,FCER1G,FCGR2B,G6PC,GPR183,HCLS1,IGKC,KLR4-KLRK1/KLRK1,LYZ,PRNP,PTPRC,RAC2,  
 SV,CXCL1,CXCL10,CXCL11,CXCL9,DOCK2,ELF3,FCER1G,FCGR2B,GPR183,HCLS1,IGKC,IL10RA,IL7R,NF  
 2,CD3D,CD52,CD53,CD69,CD8A,CORO1A,CP,CPA3,CSF2RB,CTSS,CXCL1,CXCL10,CXCL11,CXCL2,CX  
 1,CXCL10,CXCL9,ELF3,FCGR2B,GABRP,GZMA,IL10RA,JCHAIN,LCN2,LTF,LY96,LYZ,MMP7,MNDA,NFKI  
 FCER1G,FCGR2B,GPR183,IGKC,IGLL1/IGLL5,IL10RA,IL7R,MZB1,NFKBIZ,PRNP,PTPRC,SASH3,SFN,STA  
 3,CTSV,CXCL1,CXCL10,DOCK2,EGF,ELF3,FCER1G,FCGR2B,G6PC,GPR183,HCST,HOPX,IGKC,IGLL1/IGLI  
 ,CXCL6,CXCL9,CYTIP,FCER1G,FCGR2B,IGHG3,IGK,IGKC,IGLL1/IGLL5,ISG20,KLK1,LCN2,LTF,LY86,NFKB  
 54,C1orf162,C3,CCL19,CCL4,CCL5,CCN1,CD2,CD3D,CD52,CD53,CD69,CD8A,CORO1A,CP,CPA3,CSF2  
 I2B,FCER1G,FCGR2B,GABRP,HCLS1,IL7R,LAPTM5,LCN2,LY96,MMP7,NNMT,PRNP,PTPRC,SERPINA3,S  
 5,IL7R,LTF,PTPRC,RAC2,REG1A,SERPING1  
 ,CXCL11,CXCL2,CXCL6,CXCL9,DOCK2,FCER1G,FCGR2B,G6PC,GABBR1,GPR183,GZMA,HCST,HOPX,IC  
 TIMP1,VCAN  
 L5,IL7R,JCHAIN,LTF,LY86,LYZ,NFKBIZ,PTPRC,PYCARD,SASH3,SFN,SLC34A2,TIMP1,TNFSF13B,VCAN  
 CXCL10,CXCL2,ETNPPL,FCER1G,FCGR2B,G6PC,GABBR1,GABRP,HCST,HLA-DQA2,IGKC,IL7R,KLRB1,K  
 4,CCN1,CP,CSF2RB,CXCL1,CXCL10,CXCL11,CXCL9,EGF,ELF3,FCGR2B,G6PC,GABBR1,GZMA,HCLS1,HL  
 CK2,FCER1G,IGLL1/IGLL5,IL7R,LCN2,NFKBIZ,PTPRC,SASH3,SLA,STAT4,TIMP1  
 ,CXCL9,EGF,SELL,SERPING1,SLPI  
 VK,LTF,PRNP,PYCARD,RAC2,SERPINA3  
 PTPRC,RAC2,REG1A,SASH3,SELL,SERPING1  
 C5,PTPRC,PYCARD,SASH3,SELL,SFN,SLA,TNFSF13B

P,SERPING1,SFN,SLPI,VCAN  
TPRC,SFN,XCL1

,DOCK2,EGF,ELF3,FCER1G,FCGR2B,FGB,G6PC,GPR183,HCLS1,IGHV1-69,IGHV3-23,IGKC,IGKV3-20,IG  
R2B,FGB,G6PC,GPR183,GZMA,HCLS1,IGHV1-69,IGHV3-23,IGKC,IGKV3-20,IGLL1/IGLL5,IGLV1-44,IGL  
L,CXCL2,CXCL6,CXCL9,CYTIP,DOCK2,EGF,ELF3,FCER1G,FCGR2B,FGB,G6PC,GABBR1,GABRP,GPR183,C  
D8A,CORO1A,CP,CPA3,CSF2RB,CST7,CSTA,CTSS,CTSV,CXCL1,CXCL10,CXCL11,CXCL2,CXCL6,CXCL9,(  
CXCL9,EGF,ELF3,EVI2A,FCER1G,FCGR2B,FXYD5,GABBR1,GABRP,GZMA,HCLS1,HCST,HLA-DQA2,IGK  
CYTIP,DOCK2,EGF,ELF3,EVI2B,FCER1G,FCGR2B,FGB,G6PC,GPR183,GZMA,HCLS1,HCST,IGK,IGKC,IGLL  
IGKC,IGLL1/IGLL5,IL10RA,IL7R,JCHAIN,LCN2,MMP7,MZB1,NFKBIZ,NLRC5,PLAC8,PRNP,PTPRC,PYCA  
CL1,CXCL10,CXCL11,CXCL2,CXCL6,CXCL9,CYTIP,DOCK2,EGF,EMB,EVI2A,FCER1G,FCGR2B,FGB,FXYD  
R183,HCLS1,IGKC,IGLL1/IGLL5,IL10RA,IL7R,ISG20,KLRB1,KLRC4-KLRK1/KLRK1,LAPTM5,LTF,LY86,LY96  
CGR2B,GPR183,HCLS1,IGKC,IGLL1/IGLL5,IL10RA,IL7R,ISG20,KLRB1,KLRC4-KLRK1/KLRK1,LAPTM5,LC  
LF3,EVI2B,FCER1G,FCGR2B,GPR183,HCLS1,HCST,IGK,IGKC,IGLL1/IGLL5,IL10RA,IL7R,ISG20,JCHAIN,KL  
CER1G,FCGR2B,FXYD5,G6PC,GABBR1,GABRP,GZMA,HCLS1,HCST,HLA-DQA2,IGLL1/IGLL5,IL10RA,IL7  
P,GZMA,HCLS1,HCST,HLA-DQA2,IGKC,IL10RA,IL7R,KLRB1,LCN2,LTF,LY86,LYZ,MPEG1,MS4A6A,MZB  
,DOCK2,EGF,FCER1G,FCGR2B,FGB,FXYD5,G6PC,GABBR1,GPR171,GPR183,GZMA,HCLS1,IGHG3,IGK,IL  
CL2,CXCL6,CXCL9,CYTIP,EGF,ELF3,FCER1G,FCGR2B,FGB,GABBR1,GABRP,GZMA,HCLS1,HCST,HLA-D  
2B,G6PC,GPR183,GZMA,GZMK,HCST,IGHG3,IGHV1-69,IGHV3-23,IGKC,IGKV3-20,IGLV1-44,IGLV2-2  
L,HLA-DQA2,IGKC,IL10RA,IL7R,ISG20,KLRB1,LCN2,LTF,LYZ,MMP7,MS4A6A,MS4A7,NLRC5,PRNP,PTP  
BR1,GABRP,GZMA,HCLS1,HLA-DQA2,IGKC,IL10RA,IL7R,ISG20,KLRB1,LCN2,LTF,LYZ,MAFF,MMP7,M  
1G,FCGR2B,G6PC,GABBR1,GABRP,GZMA,GZMK,HCLS1,HCST,HOPX,IGHG3,IGK,IL10RA,IL7R,KLK1,KLI  
LTF,MZB1,NFKBIZ,PRNP,PTPRC,RAC2,SASH3,SELL,SFN,STAT4,TIMP1,TNFRSF17,TNFSF13B,UBD  
A,IL7R,KLK1,LCN2,LTF,MMP7,MZB1,NFKBIZ,PRNP,PTPRC,RAC2,SASH3,SELL,SERPING1,SFN,SLPI,SO  
IGHG3,IGK,IGLL1/IGLL5,IL10RA,IL7R,ISG20,JCHAIN,KLRC4-KLRK1/KLRK1,LAPTM5,LCN2,LTF,LY86,LY9  
23,IGLV3-25,IL7R,JCHAIN,LCN2,LY86,LY96,MNDA,MZB1,NFKBIZ,PRNP,PTPRC,PYCARD,RAC2,SASH3  
RC4-KLRK1/KLRK1,LCN2,LTF,LYZ,MAFF,MNDA,PLAC8,PTPRC,PYCARD,RAC2,SASH3,SELL,SERPINA3,S  
4,TIMP1,XCL1

PR183,IGKC,IGLL1/IGLL5,IL10RA,IL7R,KLRB1,MZB1,NFKBIZ,PRNP,PTPRC,SASH3,SFN,STAT4,TIMP1,TI  
XCL1

L1

Z,PRNP,PTPRC,RAC2,SELL,SLA,SLC12A3,STAT4,TIMP1,XCL1,XCL2  
PTPRC,RAC2,SELL,SLA,SLC12A3,XCL1,XCL2  
SELL,SLA,XCL1,XCL2  
FKBIZ,PRNP,PTPRC,PYCARD,RAC2,SASH3,SELL,STAT4,TIMP1,TNFRSF17,TNFSF13B,XCL1  
CL6,CXCL9,DOCK2,EGF,EMB,EVI2A,FCER1G,FCGR2B,FGB,GABRP,GPR183,GZMA,GZMK,HCLS1,HLA-  
BIZ,PTPRC,PYCARD,RAC2,SELL,SERPING1,SLPI,SPON2,STAT4,TIMP1  
T4,TNFRSF17,TNFSF13B  
L5,IL10RA,IL7R,LCN2,MMP7,MZB1,NFKBIZ,NLRC5,PRNP,PROM1,PTPRC,PYCARD,REG1A,SASH3,SELL  
BIZ,PROM1,PTPRC,SELL,SFN,SLPI,TIMP1,TNFRSF17,UBD  
RB,CST7,CSTA,CTSS,CTSV,CXCL1,CXCL10,CXCL11,CXCL2,CXCL6,CXCL9,CYP3A7,CYTIP,DOCK2,EGF,E  
LA,SLC12A3,TIMP1,VCAN,VSIG4

3K,IL7R,KLRB1,LCN2,LTF,LY96,LYZ,MAFF,MMP7,NFKBIZ,NLRC5,PRNP,PROM1,PTPRC,PYCARD,RAC2,

LRC4-KLRK1/KLRK1,LCN2,LTF,MAFF,MS4A6A,NFKBIZ,NNMT,PRNP,PTPRC,PVALB,PYCARD,RDH12,R  
A-DQA2,HOPX,IGHG2,IGLL1/IGLL5,ISG20,LAPTM5,LCN2,LTF,LY86,MMP7,MS4A7,OTOGL,PHLDA2,P



IGLL1/IGLL5,IGLV1-44,IGLV2-23,IGLV3-25,IL10RA,IL7R,JCHAIN,KLK1,KLRC4-KLRK1/KLRK1,LCN2,LTf,L  
V2-23,IGLV3-25,IL10RA,IL7R,JCHAIN,KLK1,KLRB1,KLRC4-KLRK1/KLRK1,LAPTM5,LCN2,LTf,LY96,LYZ,  
GZMA,HCLS1,HCST,HLA-DQA2,IGHG2,IGHG3,IGHV1-69,IGHV3-23,IGKC,IGKV3-20,IGLV1-44,IGLV2-  
CYP3A7,CYTIP,DOCK2,EGF,ELF3,EMB,ETNPPL,EVI2A,EVI2B,FCER1G,FCGR2B,FGF,FXD5,G6PC,GABBR  
C,IL10RA,IL7R,JCHAIN,KLRB1,LAPTM5,LCN2,LTf,LY86,LY96,LYZ,MAFF,MMP7,MPEG1,MS4A6A,MZB1,  
IGLL5,IL10RA,IL7R,ISG20,JCHAIN,KLK1,KLRB1,KLRC4-KLRK1/KLRK1,LAPTM5,LCN2,LTf,LY86,LY96,L  
RD,RAC2,SASH3,SELL,SERPING1,SFN,SLA,SLPI,SOST,SOX9,SPON2,STAT4,TFPI2,TIMP1,TNFRSF17,TN  
5,GABBR1,GABRP,GPR183,GZMA,GZMK,HCLS1,HCST,HLA-DQA2,IGKC,IGLL1/IGLL5,IGLV3-25,IL10R/  
M, MDA, MZB1, NFKB1Z, PRNP, PTPRC, PYCARD, RAC2, SASH3, SELL, SFN, SLPI, STAT4, TIMP1, TNFRSF17, TN  
V2, LTf, LY86, LY96, MDA, MZB1, NFKB1Z, PRNP, PTPRC, PYCARD, RAC2, SASH3, SELL, SFN, SLPI, STAT4, TIM  
RB1, KLRC4-KLRK1/KLRK1, LAPTM5, LCN2, LTf, LY86, LY96, MDA, MZB1, NFKB1Z, NLRC5, PRNP, PTPRC, P  
7R, KLRB1, LAPTM5, LCN2, LTf, LY86, LYZ, MMP7, MPEG1, MS4A6A, MS4A7, MZB1, NNMT, OTOGL, PROM1,  
1, NNMT, PRNP, PTPRC, PYCARD, RAC2, REG1A, RNASE6, SELL, SERPINA3, SERPING1, SLC12A3, STAT4, TIM  
10RA, IL7R, KLK1, KLRB1, KLRC4-KLRK1/KLRK1, LAPTM5, LCN2, LTf, LY96, LYZ, MMP7, NFKB1Z, NLRC5, PPP  
QA2, IGKC, IL10RA, IL7R, ISG20, JCHAIN, KLK1, KLRB1, KLRC4-KLRK1/KLRK1, LAPTM5, LCN2, LTf, LY86, LY96,  
3, IGLV3-25, IL10RA, IL7R, JCHAIN, KLRB1, KLRC4-KLRK1/KLRK1, LCN2, LTf, LY96, MMP7, NFKB1Z, NLRC5, P  
RC, PYCARD, SELL, SERPING1, STAT4, TFPI2, TIMP1, TNFRSF13B, VSIG4, XCL1  
34A6A, MS4A7, NLRC5, PRNP, PTPRC, PVALB, PYCARD, RDH12, SELL, SERPINA3, SERPING1, SOX9, STAT4, T  
RB1, KLRC4-KLRK1/KLRK1, LCN2, LTf, LY96, LYZ, MMP7, MDA, MZB1, NFKB1Z, PHLA2, PLAC8, PRNP, PR

9, STAT4, TIMP1, TNFRSF17, TNFRSF13B, UBD  
6, MMP7, MDA, NFKB1Z, NLRC5, PLAC8, PRNP, PTPRC, PVALB, PYCARD, RAC2, SELL, SERPINA3, SERPING  
1, SFN, SLA, SLPI, TIMP1, TNFRSF17, TNFRSF13B, XCL1  
SERPING1, SFN, SLA, SLPI, STAT4, TIMP1, XCL1

TNFRSF17, TNFRSF13B, XCL1

DQA2, IGKC, IGLL1/IGLL5, IGLV3-25, IL7R, ISG20, JCHAIN, KLK1, KLRC4-KLRK1/KLRK1, LAPTM5, LCN2, LTf

, SFN, SLA, SLC12A3, SOST, SOX9, STAT4, TIMP1, TNFRSF17, TNFRSF13B, TRIM50

:LF3, EMB, ETNPPL, FCER1G, FCGR2B, FXD5, G6PC, GABBR1, GABRP, GPR183, GZMA, GZMK, HCLS1, HCST,

SASH3, SERPINA3, SERPING1, SLC34A2, SLPI, SOX9, STAT4, TFPI2, TIMP1, TMPRSS4, TNFRSF17, TNFRSF13B,

EG1A, SELL, SERPINA3, SERPING1, SOX9, STAT4, TIMP1, TNFRSF17, VCAN, VSIG4  
ROM1, RDH12, SELL, SERPING1, SFN, SLC34A2, SLPI, STAT4, TFPI2, TIMP1, TMPRSS4, TNFRSF17, TNFRSF13B





.LY96,LYZ,MMP7,NFKBIZ,NNMT,PHLDA2,PRNP,PROM1,PTPRC,PYCARD,RAC2,SELL,SERPINA3,SERPIN  
,MMP7,NFKBIZ,PRNP,PTPRC,PYCARD,RAC2,SASH3,SELL,SERPINA3,SERPING1,SLPI,SPON2,STAT4,TIM  
.23,IGLV3-25,IL10RA,IL7R,ISG20,JCHAIN,KLK1,KLRB1,KLRC4-KLRK1/KLRK1,LAPTM5,LCN2,LTF,LY86,L  
'1,GABRP,GPR183,GZMA,GZMK,HCLS1,HCST,HLA-DQA2,HOPX,IGHG2,IGHG3,IGK,IGKC,IGLL1/IGLL5  
,NFKBIZ,NKG7,NLRC5,NNMT,PLAC8,PTPRC,PYCARD,RAC2,REG1A,RNASE6,SELL,SERPINA3,SERPING  
.YZ,MMP7,MNDA,MZB1,NFKBIZ,NLRC5,PLAC8,PRNP,PTPRC,PYCARD,RAC2,SASH3,SELL,SERPINA3,SI  
FSF13B,VCAN,VSIG4,XCL1  
A,IL7R,ISG20,JCHAIN,KLK1,KLRB1,KLRC4-KLRK1/KLRK1,LAPTM5,LCN2,LTF,LY86,LY96,LYZ,MPEG1,MS  
NF13B,UBD,VSIG4,XCL1  
IP1,TNFRSF17,TNFSF13B,UBD,VSIG4,XCL1  
YCARD,RAC2,SASH3,SELL,SFN,SLA,SLPI,STAT4,TIMP1,TNFRSF17,TNFSF13B,UBD,VSIG4,XCL1  
,PTPRC,RAC2,RDH12,REG1A,RNASE6,SELL,SERPINA3,SERPING1,SLC12A3,SLC34A2,SLPI,STAT4,TFPI2  
IP1,TNFSF13B,XCL1  
1R18,PRNP,PTPRC,PYCARD,RAC2,RASD1,SASH3,SELL,SERPING1,SFN,SLPI,SOST,SOX9,SPON2,STAT4  
3,LYZ,MMP7,MNDA,MPEG1,MS4A6A,MS4A7,MZB1,NFKBIZ,NLRC5,PRNP,PROM1,PTPRC,PYCARD,RE  
'RNP,PTPRC,PYCARD,RAC2,REG1A,SASH3,SELL,SERPINA3,SLC12A3,SLC34A2,SLPI,STAT4,TNFRSF17,  
FPI2,TIMP1,TNFSF13B,VCAN,VSIG4,XCL1  
DM1,PTPRC,PYCARD,RAC2,RASD1,RDH12,REG1A,SELL,SERPINA3,SFN,SLPI,SOST,SOX9,STAT4,TFPI2,

1,SLPI,SPON2,STAT4,TIMP1,TMPRSS4,TNFRSF17,TNFSF13B,UBD,VCAN,VSIG4,XCL1

,LYZ,MNDA,MPEG1,MS4A6A,NNMT,PLAC8,PROM1,PTPRC,RAC2,SASH3,SELL,SERPINA3,SLA,SLC34A

,HLA-DQA2,HOPX,IGKC,IGLL1/IGLL5,IGLV3-25,IL7R,ISG20,JCHAIN,KLK1,KLRC4-KLRK1/KLRK1,LAPTM

,UBD,VCAN,VSIG4

},VCAN,XCL1,XCL2



G1,SFN,SLPI,SOX9,SPON2,TFPI2,TIMP1,TMPRSS4,TNFSF13B,VCAN,XCL1,XCL2  
MP1,TNFSF13B,VCAN,XCL1  
Y96,LYZ,MMP7,MNDA,MPEG1,MS4A6A,MS4A7,MZB1,NFKBIZ,NLRC5,PLAC8,PRNP,PROM1,PTPRC,P  
,IGLV3-25,IL10RA,IL7R,ISG20,JCHAIN,KLK1,KLRB1,KLRC4-KLRK1/KLRK1,LAPTM5,LCN2,LTF,LY86,LY9  
1,SLC12A3,SLPI,STAT4,TIMP1,TNFRSF17,TNFSF13B,UBD,VSIG4,XCL1  
ERPING1,SFN,SLA,SLPI,SPON2,STAT4,TIMP1,TNFRSF17,TNFSF13B,UBD,VCAN,VSIG4,XCL1  
  
4A6A,MS4A7,MZB1,NFKBIZ,NLRC5,NNMT,PLAC8,PRNP,PROM1,PTPRC,PYCARD,RAC2,RNASE6,SASI

,TIMP1,TMPRSS4,TNFSF13B,VCAN,XCL1

I,TIMP1,TNFRSF17,TNFSF13B,VCAN,XCL1,XCL2  
G1A,SELL,SERPINA3,SERPING1,SFN,SLPI,SPON2,STAT4,TFPI2,TIMP1,TNFRSF17,TNFSF13B,UBD,VSIG  
TNFSF13B,UBD,VSIG4

TIMP1,TNFRSF17,TNFSF13B,UBD,VCAN,VSIG4,XCL1

A2,SLC7A13,SLPI,SOST,STAT4,TIMP1,TNFRSF17,TNFSF13B,UBD,VCAN

A5,LCN2,LTF,LY86,LYZ,MMP7,MNDA,MPEG1,MS4A6A,MS4A7,NLRC5,NNMT,OTOGL,PLAC8,PRNP,PF



YCARD,RAC2,REG1A,RNASE6,SASH3,SELL,SERPINA3,SERPING1,SFN,SLA,SLPI,SPON2,STAT4,TFPI2,TI  
6,LYZ,MAFF,MMP7,MNDA,MPEG1,MS4A6A,MS4A7,MZB1,NFKBIZ,NKG7,NLRC5,NNMT,OTOGL,PHLC

H3,SELL,SERPINA3,SERPING1,SFN,SLA,SLC7A13,SLPI,SPON2,STAT4,TIMP1,TNFRSF17,TNFSF13B,UBD

4,XCL1

ROM1,PTPRC,PYCARD,RAC2,RDH12,SASH3,SELL,SERPINA3,SERPING1,SFN,SLA,SLC12A3,SLC34A2,SL



MP1,TNFRSF17,TNFSF13B,TRIM50,UBD,VCAN,VSIG4,XCL1  
A2,PLAC8,PRNP,PROM1,PTPRC,PYCARD,RAC2,RDH12,REG1A,RNASE6,SASH3,SELL,SERPINA3,SERP

,VCAN,VSIG4,XCL1

.C7A13,SLPI,SOST,SOX9,STAT4,TFPI2,TIMP1,TMPRSS4,TNFRSF17,TNFSF13B,UBD,VCAN





ING1,SFN,SLA,SLC12A3,SLC34A2,SLC7A13,SLPI,SOST,SOX9,SPON2,STAT4,TFPI2,TIMP1,TMPRSS4,TN



JFRSF17,TNFSF13B,TRIM50,UBD,VCAN,VSIG4,XCL1,XCL2
