# Supplementary material for: The Potential Diagnostic Value of Immune-Related Genes in Interstitial Fibrosis and Tubular Atrophy after Kidney Transplantation
Source: Hindawi journal article supplement (doi:10.1155/2022/7212852), 2022-06-17
Supplement: f1 [file 7212852.f1.zip]

| Symbol   | logFC    | AveExpr  | t        | P.Value  | adj.P.Val | B        |
|----------|----------|----------|----------|----------|-----------|----------|
| ISG20    | 1.643677 | 5.008916 | 10.40607 | 3.23E-19 | 5.72E-15  | 32.93751 |
| HCLS1    | 1.401327 | 6.75469  | 8.9593   | 1.64E-15 | 5.65E-12  | 24.71009 |
| CORO1A   | 1.64865  | 5.491596 | 8.94176  | 1.81E-15 | 5.65E-12  | 24.61195 |
| IGKV3-20 | 2.650888 | 8.160569 | 8.932295 | 1.91E-15 | 5.65E-12  | 24.55901 |
| LOC10029 | 2.650888 | 8.160569 | 8.932295 | 1.91E-15 | 5.65E-12  | 24.55901 |
| IGLL1    | 2.031837 | 6.293726 | 8.815638 | 3.76E-15 | 8.32E-12  | 23.90777 |
| IGLL3P   | 2.031837 | 6.293726 | 8.815638 | 3.76E-15 | 8.32E-12  | 23.90777 |
| GABBR1   | 1.052582 | 6.542972 | 8.744705 | 5.66E-15 | 1.11E-11  | 23.51292 |
| SOX9     | 1.388878 | 6.068638 | 8.631303 | 1.09E-14 | 1.92E-11  | 22.88355 |
| LOC10029 | 1.988109 | 5.876297 | 8.524948 | 2.00E-14 | 3.22E-11  | 22.29549 |
| IGK      | 1.741313 | 5.499596 | 8.393452 | 4.24E-14 | 5.77E-11  | 21.57151 |
| FXYD5    | 1.278359 | 5.421235 | 8.342639 | 5.66E-14 | 7.13E-11  | 21.2927  |
| AGR2     | 1.33725  | 5.476603 | 8.31746  | 6.53E-14 | 7.13E-11  | 21.15475 |
| AGR3     | 1.264506 | 4.179186 | 8.310847 | 6.78E-14 | 7.13E-11  | 21.11854 |
| IL7R     | 1.775496 | 5.626119 | 8.307197 | 6.92E-14 | 7.13E-11  | 21.09856 |
| IGKC     | 1.433969 | 5.038679 | 8.289466 | 7.65E-14 | 7.13E-11  | 21.00154 |
| GPR171   | 1.352982 | 4.689944 | 8.224177 | 1.11E-13 | 8.82E-11  | 20.64488 |
| CD2      | 1.568924 | 5.346959 | 8.218096 | 1.15E-13 | 8.82E-11  | 20.61171 |
| CP       | 1.176229 | 4.45803  | 8.147051 | 1.71E-13 | 1.26E-10  | 20.22478 |
| ARHGAP3C | 1.151178 | 5.452932 | 8.139427 | 1.79E-13 | 1.27E-10  | 20.18334 |
| BIRC3    | 1.140153 | 6.679633 | 8.108323 | 2.13E-13 | 1.45E-10  | 20.01436 |
| RAC2     | 1.058787 | 5.229493 | 8.05165  | 2.93E-13 | 1.92E-10  | 19.70706 |
| CD69     | 1.254967 | 4.101764 | 7.989756 | 4.14E-13 | 2.54E-10  | 19.37234 |
| MAFF     | 1.115823 | 4.866629 | 7.988837 | 4.17E-13 | 2.54E-10  | 19.36737 |
| ARL4C    | 1.267695 | 5.648968 | 7.976268 | 4.47E-13 | 2.64E-10  | 19.29952 |
| LOC10013 | 2.525731 | 5.637721 | 7.936241 | 5.59E-13 | 3.09E-10  | 19.08369 |
| LOC10028 | 2.120061 | 6.335188 | 7.93067  | 5.77E-13 | 3.09E-10  | 19.05368 |
| SERPING1 | 1.00124  | 8.519553 | 7.908896 | 6.51E-13 | 3.28E-10  | 18.93647 |
| NFKBIZ   | 1.282996 | 7.058616 | 7.901259 | 6.80E-13 | 3.28E-10  | 18.89539 |
| CXCL1    | 1.519235 | 4.22142  | 7.899436 | 6.87E-13 | 3.28E-10  | 18.88558 |
| IGLV2-23 | 2.401045 | 6.184724 | 7.888478 | 7.30E-13 | 3.31E-10  | 18.82667 |
| LOC10029 | 2.401045 | 6.184724 | 7.888478 | 7.30E-13 | 3.31E-10  | 18.82667 |
| STAT4    | 1.003133 | 4.372517 | 7.856816 | 8.71E-13 | 3.82E-10  | 18.65661 |
| SLA      | 1.0238   | 6.013869 | 7.853791 | 8.86E-13 | 3.82E-10  | 18.64038 |
| LOC10029 | 1.8539   | 5.1947   | 7.848691 | 9.11E-13 | 3.84E-10  | 18.61301 |
| C16orf54 | 1.27821  | 4.91697  | 7.797769 | 1.21E-12 | 4.55E-10  | 18.34017 |
| SFN      | 1.255256 | 4.88395  | 7.732011 | 1.74E-12 | 6.42E-10  | 17.98884 |
| LOC65249 | 1.287074 | 4.479517 | 7.727734 | 1.78E-12 | 6.44E-10  | 17.96603 |
| MZB1     | 1.40341  | 4.106535 | 7.681104 | 2.31E-12 | 8.01E-10  | 17.71766 |
| CCL5     | 1.682794 | 6.370392 | 7.619396 | 3.24E-12 | 1.08E-09  | 17.38991 |
| PPP1R18  | 1.080726 | 6.537565 | 7.59578  | 3.69E-12 | 1.19E-09  | 17.26475 |
| PYCARD   | 1.028666 | 5.656879 | 7.589711 | 3.82E-12 | 1.21E-09  | 17.23262 |
| SASH3    | 1.076265 | 4.636625 | 7.553219 | 4.66E-12 | 1.40E-09  | 17.03961 |
| IGHV4-31 | 1.108883 | 4.622045 | 7.415285 | 9.91E-12 | 2.58E-09  | 16.31358 |
| NLRC5    | 1.072501 | 5.988091 | 7.377701 | 1.22E-11 | 3.03E-09  | 16.11674 |
| EGF      | -1.53347 | 8.71765  | -7.34663 | 1.44E-11 | 3.49E-09  | 15.95432 |
| UBD      | 1.445074 | 7.845847 | 7.21203  | 2.98E-11 | 6.19E-09  | 15.25431 |
| CXCL2    | 1.09345  | 4.100886 | 7.210214 | 3.01E-11 | 6.19E-09  | 15.2449  |
| PHLDA2   | 1.001019 | 4.538297 | 7.148166 | 4.20E-11 | 8.07E-09  | 14.9242  |
| TMPRSS4  | 1.056347 | 6.437153 | 7.145436 | 4.26E-11 | 8.10E-09  | 14.91011 |
| DOCK2    | 1.052539 | 4.951707 | 7.142786 | 4.32E-11 | 8.13E-09  | 14.89645 |
| IGHG2    | 1.804937 | 4.638779 | 7.093289 | 5.63E-11 | 9.96E-09  | 14.64162 |
| LOC10029 | 1.804937 | 4.638779 | 7.093289 | 5.63E-11 | 9.96E-09  | 14.64162 |
| LTF      | 2.584649 | 7.251204 | 7.079502 | 6.06E-11 | 1.05E-08  | 14.57078 |
| LOC10029 | 1.458731 | 3.996365 | 7.070347 | 6.36E-11 | 1.05E-08  | 14.52378 |
| LOC10029 | 1.458731 | 3.996365 | 7.070347 | 6.36E-11 | 1.05E-08  | 14.52378 |
| PVALB    | -1.17454 | 7.931683 | -7.06745 | 6.46E-11 | 1.06E-08  | 14.50893 |

|           |          |          |          |          |          |          |
|-----------|----------|----------|----------|----------|----------|----------|
| CPA3      | 1.669115 | 5.486965 | 7.032297 | 7.79E-11 | 1.20E-08 | 14.32874 |
| CSF2RB    | 1.21343  | 4.88673  | 7.011658 | 8.69E-11 | 1.32E-08 | 14.22315 |
| CD8A      | 1.271655 | 4.717732 | 7.000881 | 9.21E-11 | 1.38E-08 | 14.16808 |
| CXCL6     | 1.796922 | 4.600191 | 6.991153 | 9.69E-11 | 1.43E-08 | 14.1184  |
| LAPTM5    | 1.231011 | 7.374877 | 6.980418 | 1.03E-10 | 1.45E-08 | 14.06361 |
| TIMP1     | 1.105695 | 9.672495 | 6.951732 | 1.19E-10 | 1.65E-08 | 13.91742 |
| SERPINA3  | 2.000388 | 5.97566  | 6.944704 | 1.24E-10 | 1.69E-08 | 13.88164 |
| RNASE6    | 1.286707 | 7.444698 | 6.929296 | 1.35E-10 | 1.76E-08 | 13.80328 |
| IGLL5     | 1.689619 | 4.908784 | 6.927042 | 1.36E-10 | 1.76E-08 | 13.79182 |
| IGLV3-16  | 1.689619 | 4.908784 | 6.927042 | 1.36E-10 | 1.76E-08 | 13.79182 |
| IGLV3-25  | 1.689619 | 4.908784 | 6.927042 | 1.36E-10 | 1.76E-08 | 13.79182 |
| GABRP     | 1.111616 | 4.254822 | 6.881684 | 1.73E-10 | 2.10E-08 | 13.56164 |
| ARHGAP9   | 1.026785 | 4.91578  | 6.871773 | 1.82E-10 | 2.16E-08 | 13.51145 |
| C1orf162  | 1.145272 | 6.192983 | 6.842686 | 2.12E-10 | 2.39E-08 | 13.36433 |
| ACKR1     | 1.732087 | 5.249549 | 6.789484 | 2.81E-10 | 3.07E-08 | 13.09606 |
| IL10RA    | 1.199425 | 5.741818 | 6.779605 | 2.96E-10 | 3.19E-08 | 13.04635 |
| CD53      | 1.263399 | 7.648005 | 6.766748 | 3.16E-10 | 3.38E-08 | 12.98172 |
| CYTIP     | 1.123809 | 5.34351  | 6.761608 | 3.25E-10 | 3.44E-08 | 12.9559  |
| LOC100291 | 1.249217 | 4.64878  | 6.739012 | 3.65E-10 | 3.72E-08 | 12.84251 |
| LOC100291 | 1.249217 | 4.64878  | 6.739012 | 3.65E-10 | 3.72E-08 | 12.84251 |
| EVI2B     | 1.492502 | 6.107587 | 6.724561 | 3.94E-10 | 3.96E-08 | 12.77009 |
| JCHAIN    | 2.447171 | 7.608297 | 6.703854 | 4.39E-10 | 4.27E-08 | 12.66645 |
| KLRB1     | 1.285532 | 5.674368 | 6.694835 | 4.60E-10 | 4.38E-08 | 12.62137 |
| NKG7      | 1.107629 | 4.733653 | 6.691938 | 4.67E-10 | 4.40E-08 | 12.60689 |
| TNFRSF17  | 1.306585 | 3.719876 | 6.648211 | 5.86E-10 | 5.37E-08 | 12.38879 |
| RASD1     | 1.087053 | 6.401649 | 6.615218 | 6.95E-10 | 6.18E-08 | 12.2247  |
| ELF3      | 1.057963 | 5.670122 | 6.604324 | 7.35E-10 | 6.48E-08 | 12.17062 |
| GZMA      | 1.468193 | 5.331318 | 6.602269 | 7.43E-10 | 6.49E-08 | 12.16042 |
| CST7      | 1.009963 | 4.993537 | 6.602007 | 7.44E-10 | 6.49E-08 | 12.15912 |
| SELL      | 1.265318 | 5.282165 | 6.599709 | 7.53E-10 | 6.50E-08 | 12.14772 |
| CYR61     | 1.032628 | 5.769575 | 6.584479 | 8.15E-10 | 6.93E-08 | 12.07221 |
| IGHG3     | 1.028892 | 4.305828 | 6.499609 | 1.26E-09 | 1.01E-07 | 11.65313 |
| MMP7      | 1.436137 | 9.259862 | 6.468423 | 1.48E-09 | 1.15E-07 | 11.49986 |
| IGHV3-23  | 1.295825 | 4.283386 | 6.452275 | 1.61E-09 | 1.24E-07 | 11.42065 |
| NNMT      | 1.136048 | 5.3127   | 6.44525  | 1.66E-09 | 1.27E-07 | 11.38623 |
| LY86      | 1.056297 | 6.039907 | 6.389551 | 2.21E-09 | 1.60E-07 | 11.11399 |
| KLRK1     | 1.095805 | 5.175653 | 6.367198 | 2.48E-09 | 1.76E-07 | 11.0051  |
| SPON2     | 1.19525  | 6.65135  | 6.356565 | 2.61E-09 | 1.85E-07 | 10.95338 |
| C1QB      | 1.285945 | 7.526016 | 6.323566 | 3.09E-09 | 2.10E-07 | 10.79315 |
| HCST      | 1.010738 | 6.425965 | 6.310219 | 3.30E-09 | 2.23E-07 | 10.72848 |
| CD1C      | 1.089171 | 5.570196 | 6.305742 | 3.38E-09 | 2.27E-07 | 10.7068  |
| HOPX      | 1.388761 | 6.565986 | 6.273291 | 3.98E-09 | 2.61E-07 | 10.54994 |
| PLAC8     | 1.422655 | 5.301152 | 6.249027 | 4.50E-09 | 2.86E-07 | 10.43293 |
| EVI2A     | 1.124315 | 5.759986 | 6.248882 | 4.50E-09 | 2.86E-07 | 10.43224 |
| CYAT1     | 1.104033 | 4.22491  | 6.24781  | 4.52E-09 | 2.86E-07 | 10.42708 |
| IGLV1-44  | 1.104033 | 4.22491  | 6.24781  | 4.52E-09 | 2.86E-07 | 10.42708 |
| LOC100291 | 1.324428 | 4.309547 | 6.171942 | 6.62E-09 | 3.83E-07 | 10.06293 |
| FCGR2B    | 1.133324 | 4.979643 | 6.166645 | 6.79E-09 | 3.92E-07 | 10.03761 |
| C1QC      | 1.111573 | 6.06066  | 6.15517  | 7.19E-09 | 4.12E-07 | 9.982776 |
| SLC34A2   | 1.028367 | 4.427865 | 6.117757 | 8.66E-09 | 4.78E-07 | 9.804413 |
| IGHV1-69  | 1.301475 | 4.039939 | 6.112682 | 8.89E-09 | 4.82E-07 | 9.780267 |
| EMB       | 1.116572 | 6.211703 | 6.111715 | 8.93E-09 | 4.83E-07 | 9.775668 |
| TRIM50    | -1.08752 | 5.315961 | -6.10945 | 9.03E-09 | 4.87E-07 | 9.764892 |
| XCL2      | 1.250388 | 5.033975 | 6.080869 | 1.04E-08 | 5.45E-07 | 9.629168 |
| GPR183    | 1.121723 | 4.421846 | 6.07826  | 1.05E-08 | 5.50E-07 | 9.616796 |
| TNFSF13B  | 1.005315 | 6.148947 | 6.064785 | 1.13E-08 | 5.80E-07 | 9.552945 |
| ADGRV1    | -1.39099 | 7.10956  | -6.00022 | 1.55E-08 | 7.54E-07 | 9.24816  |
| CD3D      | 1.371134 | 6.231555 | 5.990025 | 1.63E-08 | 7.85E-07 | 9.200213 |

|           |          |          |          |          |          |          |
|-----------|----------|----------|----------|----------|----------|----------|
| XCL1      | 1.143033 | 5.051431 | 5.971362 | 1.78E-08 | 8.47E-07 | 9.112559 |
| CTSV      | -1.14424 | 7.410939 | -5.88293 | 2.75E-08 | 1.21E-06 | 8.699403 |
| REG1A     | 1.60207  | 5.018889 | 5.880299 | 2.78E-08 | 1.22E-06 | 8.687189 |
| VSIG4     | 1.146077 | 6.661703 | 5.871291 | 2.91E-08 | 1.27E-06 | 8.64532  |
| ARPC1B    | 1.29889  | 7.315583 | 5.841541 | 3.36E-08 | 1.44E-06 | 8.507331 |
| SLPI      | 1.661132 | 7.33028  | 5.795427 | 4.20E-08 | 1.72E-06 | 8.294279 |
| LOC100291 | 1.068802 | 4.280704 | 5.744584 | 5.36E-08 | 2.12E-06 | 8.060568 |
| KLK1      | -1.43723 | 7.992011 | -5.7343  | 5.63E-08 | 2.21E-06 | 8.013429 |
| TFPI2     | 1.11749  | 5.252751 | 5.721668 | 5.98E-08 | 2.30E-06 | 7.955647 |
| AFM       | -1.63014 | 7.731089 | -5.71176 | 6.27E-08 | 2.40E-06 | 7.910379 |
| FCER1G    | 1.097626 | 6.568819 | 5.680184 | 7.29E-08 | 2.67E-06 | 7.766371 |
| CD52      | 1.54885  | 7.006629 | 5.672286 | 7.57E-08 | 2.75E-06 | 7.73043  |
| LCN2      | 1.267345 | 4.767688 | 5.657462 | 8.13E-08 | 2.91E-06 | 7.663059 |
| MPEG1     | 1.096905 | 6.503437 | 5.644132 | 8.66E-08 | 3.06E-06 | 7.602574 |
| MNDA      | 1.041656 | 5.193684 | 5.627751 | 9.36E-08 | 3.27E-06 | 7.528361 |
| LOC727821 | 1.024755 | 6.981671 | 5.620153 | 9.70E-08 | 3.37E-06 | 7.493988 |
| MRO       | -1.28624 | 6.787138 | -5.61297 | 1.00E-07 | 3.46E-06 | 7.46151  |
| MS4A6A    | 1.011672 | 6.869942 | 5.608228 | 1.03E-07 | 3.51E-06 | 7.440099 |
| ANGPTL3   | -1.02928 | 6.588582 | -5.49967 | 1.71E-07 | 5.42E-06 | 6.95286  |
| ALB       | -2.04183 | 8.321406 | -5.48786 | 1.81E-07 | 5.66E-06 | 6.90021  |
| HLA-DQA1  | 1.22473  | 9.368021 | 5.466436 | 2.00E-07 | 6.14E-06 | 6.804896 |
| PROM1     | 1.190974 | 8.930425 | 5.426883 | 2.40E-07 | 7.15E-06 | 6.629573 |
| GZMK      | 1.265949 | 6.091295 | 5.337117 | 3.63E-07 | 1.01E-05 | 6.234755 |
| CXCL11    | 1.526859 | 4.735319 | 5.187393 | 7.19E-07 | 1.78E-05 | 5.585954 |
| LOC72794  | -1.1308  | 7.38698  | -5.15832 | 8.19E-07 | 1.99E-05 | 5.461425 |
| CSTA      | 1.05016  | 5.582389 | 5.156246 | 8.27E-07 | 2.01E-05 | 5.452546 |
| TMEM207   | -1.19713 | 6.532351 | -5.13401 | 9.14E-07 | 2.17E-05 | 5.357637 |
| CCL4      | 1.291272 | 5.433156 | 5.114512 | 9.97E-07 | 2.33E-05 | 5.274647 |
| VCAN      | 1.41001  | 6.004765 | 5.094953 | 1.09E-06 | 2.49E-05 | 5.191612 |
| LY96      | 1.032781 | 6.11806  | 5.074002 | 1.19E-06 | 2.69E-05 | 5.102909 |
| MS4A7     | 1.080739 | 6.746472 | 5.056219 | 1.29E-06 | 2.86E-05 | 5.027814 |
| CYP3A7    | -1.0359  | 6.612956 | -5.04939 | 1.33E-06 | 2.93E-05 | 4.999035 |
| APOH      | -1.28341 | 8.555293 | -5.02096 | 1.51E-06 | 3.24E-05 | 4.879463 |
| SLC12A3   | -1.03486 | 6.797852 | -4.98133 | 1.80E-06 | 3.70E-05 | 4.713593 |
| PTPRC     | 1.179617 | 6.021686 | 4.97864  | 1.82E-06 | 3.72E-05 | 4.702353 |
| C3        | 1.062424 | 8.419015 | 4.87578  | 2.86E-06 | 5.46E-05 | 4.276263 |
| FGF       | 1.458114 | 5.063497 | 4.871016 | 2.92E-06 | 5.53E-05 | 4.25668  |
| CCL19     | 1.37014  | 7.732347 | 4.777125 | 4.37E-06 | 7.67E-05 | 3.873522 |
| G6PC      | -1.04407 | 7.188796 | -4.69133 | 6.30E-06 | 0.000102 | 3.528082 |
| SOST      | -1.07818 | 6.936848 | -4.65771 | 7.26E-06 | 0.000114 | 3.393958 |
| CTSS      | 1.017767 | 6.993899 | 4.462472 | 1.63E-05 | 0.000215 | 2.629174 |
| RDH12     | -1.01091 | 7.718154 | -4.38014 | 2.28E-05 | 0.000277 | 2.314018 |
| LYZ       | 1.185593 | 7.6265   | 4.260202 | 3.69E-05 | 0.00041  | 1.862867 |
| OTOGL     | -1.01385 | 5.064083 | -4.08598 | 7.29E-05 | 0.000715 | 1.22481  |
| PRNP      | -1.24065 | 7.399553 | -4.04064 | 8.68E-05 | 0.000821 | 1.062187 |
| ETNPPL    | -1.01551 | 6.534343 | -3.99467 | 0.000103 | 0.000942 | 0.898789 |
| CXCL9     | 1.476748 | 7.196679 | 3.949344 | 0.000123 | 0.001076 | 0.739102 |
| CXCL10    | 1.124406 | 7.401317 | 3.713679 | 0.000292 | 0.002144 | -0.06738 |
| SLC7A13   | -1.18606 | 8.959636 | -3.29334 | 0.001249 | 0.006683 | -1.40332 |
