# Supplementary material for: The Potential Diagnostic Value of Immune-Related Genes in Interstitial Fibrosis and Tubular Atrophy after Kidney Transplantation
Source: Hindawi journal article supplement (doi:10.1155/2022/7212852), 2022-06-17
Supplement: f1 [file 7212852.f1.zip]

| Symbol   | ID   | Name                    | Synonyms | Chromoso | Category                            |
|----------|------|-------------------------|----------|----------|-------------------------------------|
| AZGP1    | 563  | alpha-2-g ZA2G ZAG      |          | 7        | Antigen_Processing_and_Presentation |
| B2M      | 567  | beta-2-mi MD43          |          | 15       | Antigen_Processing_and_Presentation |
| CALR     | 811  | calreticulin CRT HEL-S  |          | 19       | Antigen_Processing_and_Presentation |
| CANX     | 821  | calnexin CNX IP90 F     |          | 5        | Antigen_Processing_and_Presentation |
| CD1A     | 909  | CD1a moleCD1 FCB6       |          | 1        | Antigen_Processing_and_Presentation |
| CD1B     | 910  | CD1b moleCD1 CD1A       |          | 1        | Antigen_Processing_and_Presentation |
| CD1C     | 911  | CD1c moleBDCA1 CD       |          | 1        | Antigen_Processing_and_Presentation |
| CD1D     | 912  | CD1d moleCD1A R3 R      |          | 1        | Antigen_Processing_and_Presentation |
| CD1E     | 913  | CD1e moleCD1A R2        |          | 1        | Antigen_Processing_and_Presentation |
| CD4      | 920  | CD4 molecCD4mut         |          | 12       | Antigen_Processing_and_Presentation |
| CD8A     | 925  | CD8a moleCD8 Leu2 f     |          | 2        | Antigen_Processing_and_Presentation |
| CD8B     | 926  | CD8b moleCD8B1 LEL      |          | 2        | Antigen_Processing_and_Presentation |
| CD74     | 972  | CD74 moleDHLA HL        |          | 5        | Antigen_Processing_and_Presentation |
| CREB1    | 1385 | cAMP resp CREB CREE     |          | 2        | Antigen_Processing_and_Presentation |
| CTSB     | 1508 | cathepsin f APPS CPSE   |          | 8        | Antigen_Processing_and_Presentation |
| CTSE     | 1510 | cathepsin f CATE        |          | 1        | Antigen_Processing_and_Presentation |
| CTSL     | 1514 | cathepsin f CATL CTSL   |          | 9        | Antigen_Processing_and_Presentation |
| CTSS     | 1520 | cathepsin f-            |          | 1        | Antigen_Processing_and_Presentation |
| FCER1G   | 2207 | Fc fragmer FCRG         |          | 1        | Antigen_Processing_and_Presentation |
| FCGRT    | 2217 | Fc fragmer FCRN alph.   |          | 19       | Antigen_Processing_and_Presentation |
| PDIA3    | 2923 | protein dis ER60 Erp5   |          | 15       | Antigen_Processing_and_Presentation |
| HFE      | 3077 | homeostat HFE1 HH f-    |          | 6        | Antigen_Processing_and_Presentation |
| HLA-A    | 3105 | major histcHLAA         |          | 6        | Antigen_Processing_and_Presentation |
| HLA-B    | 3106 | major histcAS B-4901    |          | 6        | Antigen_Processing_and_Presentation |
| HLA-C    | 3107 | major histcD6S204 HL    |          | 6        | Antigen_Processing_and_Presentation |
| HLA-DMA  | 3108 | major histcD6S222E D    |          | 6        | Antigen_Processing_and_Presentation |
| HLA-DMB  | 3109 | major histcD6S221E R    |          | 6        | Antigen_Processing_and_Presentation |
| HLA-DOA  | 3111 | major histcHLA-DNA      |          | 6        | Antigen_Processing_and_Presentation |
| HLA-DOB  | 3112 | major histcDOB HLA_     |          | 6        | Antigen_Processing_and_Presentation |
| HLA-DPA1 | 3113 | major histcDP(W3) DF    |          | 6        | Antigen_Processing_and_Presentation |
| HLA-DPB1 | 3115 | major histcDPB1 HLA-    |          | 6        | Antigen_Processing_and_Presentation |
| HLA-DQA: | 3117 | major histcCELIAC1 D    |          | 6        | Antigen_Processing_and_Presentation |
| HLA-DQA: | 3118 | major histcDC-alpha f   |          | 6        | Antigen_Processing_and_Presentation |
| HLA-DQB1 | 3119 | major histcCELIAC1 H    |          | 6        | Antigen_Processing_and_Presentation |
| HLA-DRA  | 3122 | major histcHLA-DRA1     |          | 6        | Antigen_Processing_and_Presentation |
| HLA-DRB1 | 3123 | major histcDRB1 HLA-    |          | 6        | Antigen_Processing_and_Presentation |
| HLA-DRB3 | 3125 | major histcDRB3 HLA-    |          | 6        | Antigen_Processing_and_Presentation |
| HLA-DRB4 | 3126 | major histcDR4 DRB4     |          | 6        | Antigen_Processing_and_Presentation |
| HLA-DRB5 | 3127 | major histc-            |          | 6        | Antigen_Processing_and_Presentation |
| HLA-E    | 3133 | major histcHLA-6.2 Q    |          | 6        | Antigen_Processing_and_Presentation |
| HLA-F    | 3134 | major histcCDA12 HL     |          | 6        | Antigen_Processing_and_Presentation |
| HLA-G    | 3135 | major histcMHC-G        |          | 6        | Antigen_Processing_and_Presentation |
| HLA-H    | 3136 | major histcHLAHP        |          | 6        | Antigen_Processing_and_Presentation |
| MR1      | 3140 | major histcHLALS        |          | 1        | Antigen_Processing_and_Presentation |
| HSPA1A   | 3303 | heat shock HEL-S-103    |          | 6        | Antigen_Processing_and_Presentation |
| HSPA1B   | 3304 | heat shock HSP70-1 f-   |          | 6        | Antigen_Processing_and_Presentation |
| HSPA1L   | 3305 | heat shock HSP70-1L     |          | 6        | Antigen_Processing_and_Presentation |
| HSPA2    | 3306 | heat shock HSP70-2 f-   |          | 14       | Antigen_Processing_and_Presentation |
| HSPA4    | 3308 | heat shock APG-2 HEL    |          | 5        | Antigen_Processing_and_Presentation |
| HSPA5    | 3309 | heat shock BIP GRP78    |          | 9        | Antigen_Processing_and_Presentation |
| HSPA6    | 3310 | heat shock HSP70B'      |          | 1        | Antigen_Processing_and_Presentation |
| HSPA8    | 3312 | heat shock HEL-33 HE    |          | 11       | Antigen_Processing_and_Presentation |
| HSP90AA1 | 3320 | heat shock EL52 HEL-3   |          | 14       | Antigen_Processing_and_Presentation |
| HSP90AB1 | 3326 | heat shock D6S182 HS    |          | 6        | Antigen_Processing_and_Presentation |
| ICAM1    | 3383 | intercellula BB2 CD54 f |          | 19       | Antigen_Processing_and_Presentation |
| IFNA1    | 3439 | interferon f FL f f f f |          | 9        | Antigen_Processing_and_Presentation |
| IFNA2    | 3440 | interferon f fN-alpha-  |          | 9        | Antigen_Processing_and_Presentation |

|         |                               |                                        |
|---------|-------------------------------|----------------------------------------|
| IFNA4   | 3441 interferon :IFN-alpha4   | 9 Antigen_Processing_and_Presentation  |
| IFNA5   | 3442 interferon :IFN-alpha-   | 9 Antigen_Processing_and_Presentation  |
| IFNA6   | 3443 interferon :IFN-alpha6   | 9 Antigen_Processing_and_Presentation  |
| IFNA7   | 3444 interferon :IFN-alpha7   | 9 Antigen_Processing_and_Presentation  |
| IFNA8   | 3445 interferon :IFN-alpha8   | 9 Antigen_Processing_and_Presentation  |
| IFNA10  | 3446 interferon :IFN-alpha(   | 9 Antigen_Processing_and_Presentation  |
| IFNA13  | 3447 interferon :-            | 9 Antigen_Processing_and_Presentation  |
| IFNA14  | 3448 interferon :IFN-alpha4   | 9 Antigen_Processing_and_Presentation  |
| IFNA16  | 3449 interferon :IFN-alpha-   | 9 Antigen_Processing_and_Presentation  |
| IFNA17  | 3451 interferon :IFN-alpha1   | 9 Antigen_Processing_and_Presentation  |
| IFNA21  | 3452 interferon :IFN-alpha1   | 9 Antigen_Processing_and_Presentation  |
| IFNG    | 3458 interferon :IFG IFI      | 12 Antigen_Processing_and_Presentation |
| KIR2DL1 | 3802 killer cell irCD158A KI  | 19 Antigen_Processing_and_Presentation |
| KIR2DL2 | 3803 killer cell irCD158B1 C  | 19 Antigen_Processing_and_Presentation |
| KIR2DL3 | 3804 killer cell irCD158B2 C  | 19 Antigen_Processing_and_Presentation |
| KIR2DL4 | 3805 killer cell irCD158D G'  | 19 Antigen_Processing_and_Presentation |
| KIR2DS1 | 3806 killer cell irCD158H CI  | 19 Antigen_Processing_and_Presentation |
| KIR2DS3 | 3808 killer cell irNKAT7      | 19 Antigen_Processing_and_Presentation |
| KIR2DS4 | 3809 killer cell irCD158I KIR | 19 Antigen_Processing_and_Presentation |
| KIR2DS5 | 3810 killer cell irCD158G N   | 19 Antigen_Processing_and_Presentation |
| KIR3DL1 | 3811 killer cell irCD158E1 K  | 19 Antigen_Processing_and_Presentation |
| KIR3DL2 | 3812 killer cell ir3DL2 CD15  | 19 Antigen_Processing_and_Presentation |
| KLRC1   | 3821 killer cell leCD159A NI  | 12 Antigen_Processing_and_Presentation |
| KLRC2   | 3822 killer cell leCD159c NI  | 12 Antigen_Processing_and_Presentation |
| KLRC3   | 3823 killer cell leNKG2-E NI  | 12 Antigen_Processing_and_Presentation |
| KLRD1   | 3824 killer cell leCD94       | 12 Antigen_Processing_and_Presentation |
| LTA     | 4049 lymphotoxLT TNFB TN      | 6 Antigen_Processing_and_Presentation  |
| CIITA   | 4261 class II maj C2TA CIITA  | 16 Antigen_Processing_and_Presentation |
| MICA    | 1.01E+08 MHC class MIC-A PER  | 6 Antigen_Processing_and_Presentation  |
| MICB    | 4277 MHC class PERB11.2       | 6 Antigen_Processing_and_Presentation  |
| NFYA    | 4800 nuclear tra CBF-A CBF    | 6 Antigen_Processing_and_Presentation  |
| NFYB    | 4801 nuclear tra CBF-A CBF    | 12 Antigen_Processing_and_Presentation |
| NFYC    | 4802 nuclear tra CBF-C CBF    | 1 Antigen_Processing_and_Presentation  |
| LGMN    | 5641 legumain AEP LGMN        | 14 Antigen_Processing_and_Presentation |
| PSMB8   | 5696 proteasomALDD D6S:       | 6 Antigen_Processing_and_Presentation  |
| PSMC1   | 5700 proteasomP26S4 S4 p      | 14 Antigen_Processing_and_Presentation |
| PSMC2   | 5701 proteasomMSS1 Nbla       | 7 Antigen_Processing_and_Presentation  |
| PSMC3   | 5702 proteasomTBP1            | 11 Antigen_Processing_and_Presentation |
| PSMC4   | 5704 proteasomMIP224 RP       | 19 Antigen_Processing_and_Presentation |
| PSMC5   | 5705 proteasomS8 SUG-1 S      | 17 Antigen_Processing_and_Presentation |
| PSMC6   | 5706 proteasomSUG2 p42        | 14 Antigen_Processing_and_Presentation |
| PSMD1   | 5707 proteasomP112 Rpn2       | 2 Antigen_Processing_and_Presentation  |
| PSMD2   | 5708 proteasomP97 RPN1 S      | 3 Antigen_Processing_and_Presentation  |
| PSMD3   | 5709 proteasomP58 RPN3 S      | 17 Antigen_Processing_and_Presentation |
| PSMD4   | 5710 proteasomAF AF-1 A'      | 1 Antigen_Processing_and_Presentation  |
| PSMD5   | 5711 proteasomS5B             | 9 Antigen_Processing_and_Presentation  |
| PSMD7   | 5713 proteasomMOV34 P4        | 16 Antigen_Processing_and_Presentation |
| PSMD8   | 5714 proteasomHEL-S-91r       | 19 Antigen_Processing_and_Presentation |
| PSMD10  | 5716 proteasomdJ889N15.:X     | Antigen_Processing_and_Presentation    |
| PSMD11  | 5717 proteasomRpn6 S9 p4      | 17 Antigen_Processing_and_Presentation |
| PSMD13  | 5719 proteasomHSPC027 F       | 11 Antigen_Processing_and_Presentation |
| PSME1   | 5720 proteasomHEL-S-12C       | 14 Antigen_Processing_and_Presentation |
| PSME1   | 5720 proteasomHEL-S-12C       | 14 Antigen_Processing_and_Presentation |
| PSME2   | 5721 proteasomPA28B PA2       | 14 Antigen_Processing_and_Presentation |
| PSME2   | 5721 proteasomPA28B PA2       | 14 Antigen_Processing_and_Presentation |
| RELB    | 5971 RELB protcl-REL IMDf     | 19 Antigen_Processing_and_Presentation |
| RFX5    | 5993 regulatory -             | 1 Antigen_Processing_and_Presentation  |
| RFXAP   | 5994 regulatory -             | 13 Antigen_Processing_and_Presentation |

|          |                           |                                        |
|----------|---------------------------|----------------------------------------|
| SLC10A2  | 6555 solute carrier       | 13 Antigen Processing and Presentation |
| TAP1     | 6890 transporter ABC17    | 6 Antigen Processing and Presentation  |
| TAP2     | 6891 transporter ABC18    | 6 Antigen Processing and Presentation  |
| TAPBP    | 6892 TAP binding          | 6 Antigen Processing and Presentation  |
| THBS1    | 7057 thrombospondin       | 15 Antigen Processing and Presentation |
| SEM1     | 7979 SEM1 26S             | 7 Antigen Processing and Presentation  |
| KLRC4    | 8302 killer cell lectin   | 12 Antigen Processing and Presentation |
| AP3B1    | 8546 adaptor related      | 5 Antigen Processing and Presentation  |
| RFXANK   | 8625 regulatory ANKRA1    | 19 Antigen Processing and Presentation |
| PSMD6    | 9861 proteasome Rpn7      | 3 Antigen Processing and Presentation  |
| PSME3    | 10197 proteasome HEL-S-28 | 17 Antigen Processing and Presentation |
| PSMD14   | 10213 proteasome PAD1     | 2 Antigen Processing and Presentation  |
| CLEC4M   | 10332 C-type lectin       | 19 Antigen Processing and Presentation |
| IFI30    | 10437 IFI30 lysosomal     | 19 Antigen Processing and Presentation |
| PROCR    | 10544 protein C receptor  | 20 Antigen Processing and Presentation |
| ADRM1    | 11047 adhesion related    | 20 Antigen Processing and Presentation |
| ECPAS    | 23392 Ecm29 protein       | 9 Antigen Processing and Presentation  |
| TRPC4AP  | 26133 transient receptor  | 20 Antigen Processing and Presentation |
| CD209    | 30835 CD209 molecule      | 19 Antigen Processing and Presentation |
| UBXN1    | 51035 UBX domain          | 11 Antigen Processing and Presentation |
| ERAP1    | 51752 endoplasmic         | 5 Antigen Processing and Presentation  |
| TAPBPL   | 55080 TAP binding         | 12 Antigen Processing and Presentation |
| KIR2DL5A | 57292 killer cell         | 19 Antigen Processing and Presentation |
| ERAP2    | 64167 endoplasmic         | 5 Antigen Processing and Presentation  |
| ULBP3    | 79465 UL16 binding        | 6 Antigen Processing and Presentation  |
| ULBP2    | 80328 UL16 binding        | 6 Antigen Processing and Presentation  |
| ULBP1    | 80329 UL16 binding        | 6 Antigen Processing and Presentation  |
| KIR3DL3  | 115653 killer cell        | 19 Antigen Processing and Presentation |
| RAET1E   | 135250 retinoic acid      | 6 Antigen Processing and Presentation  |
| RAET1L   | 154064 retinoic acid      | 6 Antigen Processing and Presentation  |
| UBR1     | 197131 ubiquitin          | 15 Antigen Processing and Presentation |
| RAET1G   | 353091 retinoic acid      | 6 Antigen Processing and Presentation  |
| PDIA2    | 64714 protein disulfide   | 16 Antigen Processing and Presentation |
| HAMP     | 57817 hepcidin            | 19 Antimicrobials                      |
| PI3      | 5266 peptidase            | 20 Antimicrobials                      |
| CAMP     | 820 cathelicidin          | 3 Antimicrobials                       |
| DEFB4A   | 1673 defensin             | 8 Antimicrobials                       |
| PPBP     | 5473 pro-platelet         | 4 Antimicrobials                       |
| REG3G    | 130120 regenerating       | 2 Antimicrobials                       |
| CXCL14   | 9547 C-X-C motif          | 5 Antimicrobials                       |
| CXCL16   | 58191 C-X-C motif         | 17 Antimicrobials                      |
| SLPI     | 6590 secretory            | 20 Antimicrobials                      |
| CXCL8    | 3576 C-X-C motif          | 4 Antimicrobials                       |
| CXCL10   | 3627 C-X-C motif          | 4 Antimicrobials                       |
| CXCL9    | 4283 C-X-C motif          | 4 Antimicrobials                       |
| CXCL5    | 6374 C-X-C motif          | 4 Antimicrobials                       |
| CXCL11   | 6373 C-X-C motif          | 4 Antimicrobials                       |
| CXCL6    | 6372 C-X-C motif          | 4 Antimicrobials                       |
| CXCL1    | 2919 C-X-C motif          | 4 Antimicrobials                       |
| CXCL12   | 6387 C-X-C motif          | 10 Antimicrobials                      |
| CXCL13   | 10563 C-X-C motif         | 4 Antimicrobials                       |
| CXCL2    | 2920 C-X-C motif          | 4 Antimicrobials                       |
| PF4      | 5196 platelet factor      | 4 Antimicrobials                       |
| XCL1     | 6375 X-C motif            | 1 Antimicrobials                       |
| CXCL3    | 2921 C-X-C motif          | 4 Antimicrobials                       |
| DEFB103B | 55894 defensin            | 8 Antimicrobials                       |
| CCL13    | 6357 C-C motif            | 17 Antimicrobials                      |
| CCL1     | 6346 C-C motif            | 17 Antimicrobials                      |

|          |                              |                   |
|----------|------------------------------|-------------------|
| DEFB1    | 1672 defensin b BD1 DEFB-    | 8 Antimicrobials  |
| CCL8     | 6355 C-C motif HC14 MCP      | 17 Antimicrobials |
| ELANE    | 1991 elastase, n ELA2 GE H   | 19 Antimicrobials |
| DEFB103A | 414325 defensin b BD-3 DEFB  | 8 Antimicrobials  |
| DEFA3    | 1668 defensin a DEF3 HNP-    | 8 Antimicrobials  |
| DEFA1    | 1667 defensin a DEF1 DEFA    | 8 Antimicrobials  |
| TMSB10   | 9168 thymosin k MIG12 TB1    | 2 Antimicrobials  |
| DEFA6    | 1671 defensin a DEF6 HD-6    | 8 Antimicrobials  |
| DEFA5    | 1670 defensin a DEF5 HD-5    | 8 Antimicrobials  |
| DEFA4    | 1669 defensin a DEF4 HNP-    | 8 Antimicrobials  |
| LCN2     | 3934 lipocalin 2 24p3 MSF    | 9 Antimicrobials  |
| LCN1     | 3933 lipocalin 1 PMFA TLC    | 9 Antimicrobials  |
| COLEC10  | 10584 collectin s 3MC3 CL-3  | 8 Antimicrobials  |
| BPI      | 671 bactericidaBPIFD1 rBF    | 20 Antimicrobials |
| S100A9   | 6280 S100 calci 60B8AG C/    | 1 Antimicrobials  |
| S100A8   | 6279 S100 calci 60B8AG C/    | 1 Antimicrobials  |
| DCD      | 117159 dermcidin A DD DCD    | 12 Antimicrobials |
| LCN6     | 158062 lipocalin 6 LCN5 UNQ  | 9 Antimicrobials  |
| S100A12  | 6283 S100 calci CAAF1 CA/    | 1 Antimicrobials  |
| HTN3     | 3347 histatin 3 HIS2 HTN2    | 4 Antimicrobials  |
| LCN8     | 138307 lipocalin 8 EP17 LCN5 | 9 Antimicrobials  |
| DEFA1B   | 728358 defensin a HNP-1 HP   | 8 Antimicrobials  |
| CCR10    | 2826 C-C motif GPR2          | 17 Antimicrobials |
| CELA1    | 1990 chymotryp ELA1          | 12 Antimicrobials |
| DEFB106A | 245909 defensin b BD-6 DEFB  | 8 Antimicrobials  |
| PENK     | 5179 proenkephPE PENK-A      | 8 Antimicrobials  |
| BPIFC    | 254240 BPI fold coBPIL2      | 22 Antimicrobials |
| MMP12    | 4321 matrix metHME ME M      | 11 Antimicrobials |
| BPIFB6   | 128859 BPI fold coBPIL3 LPLU | 20 Antimicrobials |
| LEAP2    | 116842 liver enrichLEAP-2    | 5 Antimicrobials  |
| SFTPD    | 6441 surfactant  COLEC7 PS   | 10 Antimicrobials |
| LCN9     | 392399 lipocalin 9 HEL129    | 9 Antimicrobials  |
| BPIFB2   | 80341 BPI fold coBPIL1 C20c  | 20 Antimicrobials |
| PTGDS    | 5730 prostaglan L-PGDS LP    | 9 Antimicrobials  |
| TMSB4X   | 7114 thymosin kFX PTMB4 X    | Antimicrobials    |
| PGLYRP1  | 8993 peptidoglyPGLYRP PC     | 19 Antimicrobials |
| ZC3HAV1  | 56829 zinc finger ARTD13 FL  | 7 Antimicrobials  |
| TMSB15A  | 11013 thymosin kTMSB15 TIX   | Antimicrobials    |
| S100B    | 6285 S100 calci NEF S100 S   | 21 Antimicrobials |
| S100A13  | 6284 S100 calci -            | 1 Antimicrobials  |
| S100A6   | 6277 S100 calci 2A9 5B10 C   | 1 Antimicrobials  |
| DEFB119  | 245932 defensin b DEFB-19 D  | 20 Antimicrobials |
| DEFB107A | 245910 defensin b BD-7 DEFB  | 8 Antimicrobials  |
| DEFB105A | 245908 defensin b BD-5 DEFB  | 8 Antimicrobials  |
| SERPIND1 | 3053 serpin fam D22S673 H    | 22 Antimicrobials |
| DEFB129  | 140881 defensin b C20orf87 C | 20 Antimicrobials |
| DEFB127  | 140850 defensin b C20orf73 C | 20 Antimicrobials |
| S100P    | 6286 S100 calci MIG9         | 4 Antimicrobials  |
| S100A7   | 6278 S100 calci PSOR1 S1C    | 1 Antimicrobials  |
| DEFB104A | 140596 defensin b BD-4 DEFB  | 8 Antimicrobials  |
| DEFB126  | 81623 defensin b C20orf8 DE  | 20 Antimicrobials |
| DEFB106B | 503841 defensin b BD-6 DEFB  | 8 Antimicrobials  |
| DEFB104B | 503618 defensin b BD-4 DEFB  | 8 Antimicrobials  |
| DEFB107B | 503614 defensin b HsT21816   | 8 Antimicrobials  |
| PGLYRP3  | 114771 peptidoglyPGLYRP alq  | 1 Antimicrobials  |
| PGLYRP2  | 114770 peptidoglyHMFT0141    | 19 Antimicrobials |
| S100A10  | 6281 S100 calci 42C ANX2I    | 1 Antimicrobials  |
| S100A2   | 6273 S100 calci CAN19 S1C    | 1 Antimicrobials  |

|          |                               |                   |
|----------|-------------------------------|-------------------|
| DEFB125  | 245938 defensin b DEFB-25     | 20 Antimicrobials |
| DEFB123  | 245936 defensin b DEFB-23 D   | 20 Antimicrobials |
| DEFB105B | 504180 defensin b BD-5 DEFE   | 8 Antimicrobials  |
| DEFB132  | 400830 defensin b BD-32 DEF   | 20 Antimicrobials |
| BPIFB3   | 359710 BPI fold co C20orf185  | 20 Antimicrobials |
| LCN12    | 286256 lipocalin 1 -          | 9 Antimicrobials  |
| PGLYRP4  | 57115 peptidogly PGLYRP be    | 1 Antimicrobials  |
| S100A11  | 6282 S100 calci HEL-S-43 I    | 1 Antimicrobials  |
| S100A5   | 6276 S100 calci S100D         | 1 Antimicrobials  |
| S100A3   | 6274 S100 calci S100E         | 1 Antimicrobials  |
| S100A1   | 6271 S100 calci S100 S100-    | 1 Antimicrobials  |
| DEFB128  | 245939 defensin b DEFB-28 D   | 20 Antimicrobials |
| DEFB108B | 245911 defensin b DEFB-8 hB   | 11 Antimicrobials |
| HTN1     | 3346 histatin 1 HIS1          | 4 Antimicrobials  |
| LMBR1L   | 55716 limb devel LMR          | 12 Antimicrobials |
| S100A7A  | 338324 S100 calci NICE-2 N C  | 1 Antimicrobials  |
| DEFB118  | 117285 defensin b C20orf63 C  | 20 Antimicrobials |
| COLEC12  | 81035 collectin s CLP1 NSR2   | 18 Antimicrobials |
| TMSB4Y   | 9087 thymosin t TB4Y Y        | Antimicrobials    |
| DEFB131A | 644414 defensin b DEFB-31 D   | 4 Antimicrobials  |
| DEFB134  | 613211 defensin b -           | 8 Antimicrobials  |
| DEFB130A | 245940 defensin b DEFB-30 D   | 8 Antimicrobials  |
| DEFB124  | 245937 defensin b DEFB-24     | 20 Antimicrobials |
| DEFB121  | 245934 defensin b DEFB21 ES   | 20 Antimicrobials |
| DEFB116  | 245930 defensin b DEFB-16     | 20 Antimicrobials |
| DEFB115  | 245929 defensin b DEFB-15     | 20 Antimicrobials |
| DEFB114  | 245928 defensin b DEFB-14 D   | 6 Antimicrobials  |
| DEFB113  | 245927 defensin b DEFB-13     | 6 Antimicrobials  |
| DEFB112  | 245915 defensin b DEFB-12     | 6 Antimicrobials  |
| DEFB110  | 245913 defensin b DEFB-10 D   | 6 Antimicrobials  |
| TMSB15B  | 286527 thymosin t TMSB15A X   | Antimicrobials    |
| DEFB133  | 403339 defensin b -           | 6 Antimicrobials  |
| S100Z    | 170591 S100 calci Gm625 S1C   | 5 Antimicrobials  |
| MAVS     | 57506 mitochond CARDIF IP     | 20 Antimicrobials |
| TMSB4XP8 | 7117 TMSB4X p TMSL3           | 4 Antimicrobials  |
| S100A14  | 57402 S100 calci BCMP84 S     | 1 Antimicrobials  |
| LCN10    | 414332 lipocalin 1C-          | 9 Antimicrobials  |
| S100A16  | 140576 S100 calci AAG13 DT    | 1 Antimicrobials  |
| DEFB136  | 613210 defensin b DEFB137     | 8 Antimicrobials  |
| DEFB135  | 613209 defensin b DEFB136     | 8 Antimicrobials  |
| DEFB117  | 245931 defensin b DEFB-17     | 20 Antimicrobials |
| DEFB110  | 245913 defensin b DEFB-10 D   | 6 Antimicrobials  |
| ZC3HAV1L | 92092 zinc finger C7orf39     | 7 Antimicrobials  |
| S100A7L2 | 645922 S100 calci S100a7b     | 1 Antimicrobials  |
| MBL3P    | 50639 mannose- COLEC2 M       | 10 Antimicrobials |
| DEFB4B   | 1E+08 defensin b DEFB4P       | 8 Antimicrobials  |
| BPIFB4   | 149954 BPI fold co C20orf186  | 20 Antimicrobials |
| IFNAR1   | 3454 interferon  AVP IFN-a    | 21 Antimicrobials |
| AZU1     | 566 azurocidin AZAMP AZ       | 19 Antimicrobials |
| DEFB131B | 1E+08 defensin b -            | 11 Antimicrobials |
| DEFA1A3  | 613253 defensin a DEFA1 DEF   | 8 Antimicrobials  |
| LCN1P1   | 286310 lipocalin 1 LCN1L1 bA  | 9 Antimicrobials  |
| S100G    | 795 S100 calci CABP CABIX     | Antimicrobials    |
| DEFA7P   | 724067 defensin a DEFA7       | 8 Antimicrobials  |
| DEFB130B | 1E+08 defensin b -            | 8 Antimicrobials  |
| DEFB108F | 1E+08 defensin b DEFB108P     | 4 Antimicrobials  |
| DEFB131C | 1E+08 defensin b -            | 8 Antimicrobials  |
| TCHHL1   | 126637 trichohyalin S100A17 T | 1 Antimicrobials  |

|          |                    |              |                   |
|----------|--------------------|--------------|-------------------|
| TINAGL1  | 64129 tubulointer  | ARG1 LCN     | 1 Antimicrobials  |
| IFNGR1   | 3459 interferon    | CD119 IFN    | 6 Antimicrobials  |
| SLC22A17 | 51310 solute carri | 24p3R BOC    | 14 Antimicrobials |
| WFIKK1   | 117166 WAP, follis | C16orf12 F   | 16 Antimicrobials |
| WFDC2    | 10406 WAP four-    | EDDM4 HE     | 20 Antimicrobials |
| IL6      | 3569 interleukin   | BSF-2 BSF2   | 7 Antimicrobials  |
| UMODL1   | 89766 uromoduli    | -            | 21 Antimicrobials |
| TGFB1    | 7040 transformir   | CED DPD1     | 19 Antimicrobials |
| PF4V1    | 5197 platelet fac  | CXCL4L1 C    | 4 Antimicrobials  |
| MMP9     | 4318 matrix met    | CLG4B GEL    | 20 Antimicrobials |
| ANOS1    | 3730 anosmin 1     | ADMLX HF-X   | Antimicrobials    |
| TLR4     | 7099 toll like rec | ARMD10 C     | 9 Antimicrobials  |
| IFNG     | 3458 interferon    | IFG IFI      | 12 Antimicrobials |
| SPAG11B  | 10407 sperm assc   | EDDM2B E     | 8 Antimicrobials  |
| A2M      | 2 alpha-2-m        | A2MD CPA     | 12 Antimicrobials |
| CTSL     | 1514 cathepsin     | LCATL CTSL   | 9 Antimicrobials  |
| NFKB1    | 4790 nuclear fac   | VID12 EB     | 4 Antimicrobials  |
| APOBEC3C | 60489 apolipoprc   | A3G ARCD     | 22 Antimicrobials |
| FABP6    | 2172 fatty acid    | kI-15P I-BA  | 5 Antimicrobials  |
| NOD2     | 64127 nucleotide   | ACUG BLA     | 16 Antimicrobials |
| MBL2     | 4153 mannose       | kCOLEC1 H    | 10 Antimicrobials |
| SFTPA1   | 653509 surfactant  | COLEC4 P     | 10 Antimicrobials |
| RBP1     | 5947 retinol bin   | CRABP-II C   | 3 Antimicrobials  |
| TLR2     | 7097 toll like rec | CD282 TIL    | 4 Antimicrobials  |
| SLC40A1  | 30061 solute carri | FPN1 HFE4    | 2 Antimicrobials  |
| PLAU     | 5328 plasminog     | ATF BDPLT    | 10 Antimicrobials |
| IL1B     | 3553 interleukin   | IL-1 IL1-BE  | 2 Antimicrobials  |
| PAEP     | 5047 progestag     | GD GdA G     | 9 Antimicrobials  |
| HJV      | 148738 hemojuveli  | HFE2 HFE2    | 1 Antimicrobials  |
| MUC5AC   | 4586 mucin 5AC     | MUC5 TBM     | 11 Antimicrobials |
| CTSS     | 1520 cathepsin     | -            | 1 Antimicrobials  |
| OBP2A    | 29991 odorant bi   | LCN13 OBI    | 9 Antimicrobials  |
| PLTP     | 5360 phospholi     | BPIFE HDL    | 20 Antimicrobials |
| MX1      | 4599 MX dynam      | IFI-78K IFI7 | 21 Antimicrobials |
| DDX58    | 23586 DExD/H-b     | RIG-I RIG1   | 9 Antimicrobials  |
| IFNL1    | 282618 interferon  | IL-29 IL29   | 19 Antimicrobials |
| IRF3     | 3661 interferon    | IIAE7        | 19 Antimicrobials |
| SFTPA2   | 729238 surfactant  | COLEC5 P     | 10 Antimicrobials |
| LPA      | 4018 lipoprotein   | AK38 APO     | 6 Antimicrobials  |
| LBP      | 3929 lipopolysac   | BPIFD2       | 20 Antimicrobials |
| RBP4     | 5950 retinol bin   | MCOPCB1      | 10 Antimicrobials |
| SFTPA1   | 653509 surfactant  | COLEC4 P     | 10 Antimicrobials |
| NOX4     | 50507 NADPH ox     | KOX KOX-     | 11 Antimicrobials |
| LTF      | 4057 lactotransf   | GIG12 HEL    | 3 Antimicrobials  |
| IFNB1    | 3456 interferon    | IFB IFF IFN  | 9 Antimicrobials  |
| RBP5     | 83758 retinol bin  | CRBP-III CI  | 12 Antimicrobials |
| FABP7    | 2173 fatty acid    | kB-FABP BL   | 6 Antimicrobials  |
| FABP5    | 2171 fatty acid    | kE-FABP EF   | 8 Antimicrobials  |
| FABP3    | 2170 fatty acid    | kFABP11 H-   | 1 Antimicrobials  |
| FABP2    | 2169 fatty acid    | kFABP I-FA   | 4 Antimicrobials  |
| FABP4    | 2167 fatty acid    | kA-FABP AF   | 8 Antimicrobials  |
| R3HDM1   | 140902 R3H doma    | dJ881L22.3   | 20 Antimicrobials |
| BPIFA3   | 128861 BPI fold    | coC20orf71 S | 20 Antimicrobials |
| BPIFB1   | 92747 BPI fold     | coC20orf114  | 20 Antimicrobials |
| OASL     | 8638 2'-5'-oligo   | OASL1 OA     | 12 Antimicrobials |
| CRABP2   | 1382 cellular reti | CRABP-II F   | 1 Antimicrobials  |
| CRABP1   | 1381 cellular reti | CRABP CR     | 15 Antimicrobials |
| RBP7     | 116362 retinol bin | CRABP4 CF    | 1 Antimicrobials  |

|          |                                                     |                   |
|----------|-----------------------------------------------------|-------------------|
| DUOX1    | 53905 dual oxidase: LNOX1 NC                        | 15 Antimicrobials |
| OBP2B    | 29989 odorant binding protein: LCN14 OBI            | 9 Antimicrobials  |
| RBP2     | 5948 retinol binding protein: CRABP-II C            | 3 Antimicrobials  |
| LCN15    | 389812 lipocalin 15: PRO6093 L                      | 9 Antimicrobials  |
| CETP     | 1071 cholesteryl ester transfer protein: BPIFF HDL  | 16 Antimicrobials |
| FABP12   | 646486 fatty acid binding protein: FABP12           | 8 Antimicrobials  |
| FABP9    | 646480 fatty acid binding protein: FABP9            | 8 Antimicrobials  |
| BPIFA1   | 51297 BPI fold containing protein: LUNX NAS         | 20 Antimicrobials |
| LCNL1    | 401562 lipocalin like protein: LCNL1                | 9 Antimicrobials  |
| C8G      | 733 complement component C8: C8C                    | 9 Antimicrobials  |
| SPAG11A  | 653423 sperm associated protein: EDDM2A F           | 8 Antimicrobials  |
| PI15     | 51050 peptidase inhibitor: CRISP8 P24               | 8 Antimicrobials  |
| NOX1     | 27035 NADPH oxidase: GP91-2 MEX                     | Antimicrobials    |
| PMP2     | 5375 peripheral myelin protein: CMT1G FA            | 8 Antimicrobials  |
| APOD     | 347 apolipoprotein: APOD                            | 3 Antimicrobials  |
| ORM2     | 5005 orosomucoid: AGP-B AG                          | 9 Antimicrobials  |
| ORM1     | 5004 orosomucoid: AGP-A AG                          | 9 Antimicrobials  |
| TNF      | 7124 tumor necrosis factor: TNF-alpha               | 6 Antimicrobials  |
| CTSG     | 1511 cathepsin G: CATG CG                           | 14 Antimicrobials |
| PRTN3    | 5657 proteinase 3: ACPA AGP                         | 19 Antimicrobials |
| MAPK1    | 5594 mitogen-activated protein kinase: ERK-2        | 22 Antimicrobials |
| PML      | 5371 promyelocytic leukemia protein: MYL PP867      | 15 Antimicrobials |
| AEN      | 64782 apoptosis inducer: ISG20L1 pp                 | 15 Antimicrobials |
| CYBB     | 1536 cytochrome b-558: AMCBX2 CX                    | Antimicrobials    |
| BPIFA2   | 140683 BPI fold containing protein: C20orf70 P      | 20 Antimicrobials |
| ISG20    | 3669 interferon inducible protein: CD25 HEM         | 15 Antimicrobials |
| BCL3     | 602 BCL3 transmembrane protein: BCL4 D19S           | 19 Antimicrobials |
| ISG20L2  | 81875 interferon inducible protein: HSD38           | 1 Antimicrobials  |
| NOX5     | 79400 NADPH oxidase: NOX5                           | 15 Antimicrobials |
| NOX3     | 50508 NADPH oxidase: GP91-3 MEX                     | 6 Antimicrobials  |
| DUOX2    | 50506 dual oxidase: LNOX2 NC                        | 15 Antimicrobials |
| TLR3     | 7098 toll like receptor: CD283 IIAE                 | 4 Antimicrobials  |
| TFRC     | 7037 transferrin receptor: CD71 IMD4                | 3 Antimicrobials  |
| IFIH1    | 64135 interferon inducible protein: AGS7 H1cd       | 2 Antimicrobials  |
| LRP1     | 4035 LDL receptor: A2MR APC                         | 12 Antimicrobials |
| TRIM5    | 85363 tripartite motif domain: RNF88 TRIM           | 11 Antimicrobials |
| IDO1     | 3620 indoleamine 2,3-dioxygenase: IDO IDO-1         | 8 Antimicrobials  |
| GDF15    | 9518 growth differentiation factor: GDF-15 M        | 19 Antimicrobials |
| NEDD4    | 4734 NEDD4 E3 ubiquitin ligase: NEDD4-1 F           | 15 Antimicrobials |
| ADIPOQ   | 9370 adiponectin: ACDC ACR                          | 3 Antimicrobials  |
| STAT3    | 6774 signal transducer: ADMIO AC                    | 17 Antimicrobials |
| STAT1    | 6772 signal transducer: CANDF7 IM                   | 2 Antimicrobials  |
| IFNL2    | 282616 interferon inducible protein: IL-28A IL28    | 19 Antimicrobials |
| SOCS3    | 9021 suppressor of cytokine signaling: ATOD4 CIS    | 17 Antimicrobials |
| SEMG1    | 6406 semenogelins: CT103 SEM                        | 20 Antimicrobials |
| TNFSF10  | 8743 TNF superfamily: APO2L Apo                     | 3 Antimicrobials  |
| CCL20    | 6364 C-C motif chemokine: CKb4 Exod                 | 2 Antimicrobials  |
| SOCS1    | 8651 suppressor of cytokine signaling: CIS1 CISH1   | 16 Antimicrobials |
| RNASEL   | 6041 ribonuclease: PRCA1 RN                         | 1 Antimicrobials  |
| IRF1     | 3659 interferon inducible protein: IRF-1 MAR        | 5 Antimicrobials  |
| IL15     | 3600 interleukin IL-15                              | 4 Antimicrobials  |
| APOBEC3F | 200316 apolipoprotein B editing protein: A3F ARP8 I | 22 Antimicrobials |
| PLAAT4   | 5920 phospholipase: HRASLS4 F                       | 11 Antimicrobials |
| CHIT1    | 1118 chitinase 1: CHI3 CHIT                         | 1 Antimicrobials  |
| IFNA1    | 3439 interferon alpha: IFL IFN IFN                  | 9 Antimicrobials  |
| CD40     | 958 CD40 molecule: Bp50 CDW                         | 20 Antimicrobials |
| TLR7     | 51284 toll like receptor: TLR7-like X               | Antimicrobials    |
| PPIA     | 5478 peptidyl prolyl isomerase: CYPA CYP            | 7 Antimicrobials  |

|         |                                |                   |
|---------|--------------------------------|-------------------|
| HFE     | 3077 homeostat HFE1 HH H       | 6 Antimicrobials  |
| ZYX     | 7791 zyxin ESP-2 HED           | 7 Antimicrobials  |
| NLRX1   | 79671 NLR family CLR11.3 DI    | 11 Antimicrobials |
| PGC     | 5225 progastrics PEPC PGI      | 6 Antimicrobials  |
| VEGFA   | 7422 vascular er MVCD1 VE      | 6 Antimicrobials  |
| IKBKE   | 9641 inhibitor of IKK-E IKK-i  | 1 Antimicrobials  |
| ISG15   | 9636 ISG15 ubiqu G1P2 IFI15    | 1 Antimicrobials  |
| DHX58   | 79132 DExH-box D11LGP2 E       | 17 Antimicrobials |
| TNFAIP3 | 7128 TNF alpha A20 AISBL       | 6 Antimicrobials  |
| TFR2    | 7036 transferrin HFE3 TFRC     | 7 Antimicrobials  |
| FCN2    | 2220 ficolin 2 EBP-37 FC       | 9 Antimicrobials  |
| MUC4    | 4585 mucin 4, c cASGP HSA      | 3 Antimicrobials  |
| F2R     | 2149 coagulation CF2R HTR      | 5 Antimicrobials  |
| ELN     | 2006 elastin ADCL1 SV          | 7 Antimicrobials  |
| IL27    | 246778 interleukin IL-27 IL-27 | 16 Antimicrobials |
| MAPT    | 4137 microtubul DDPAC FTI      | 17 Antimicrobials |
| LYZ     | 4069 lysozyme LYZF1 LZM        | 12 Antimicrobials |
| CCL5    | 6352 C-C motif D17S136E        | 17 Antimicrobials |
| LEP     | 3952 leptin LEPD OB C          | 7 Antimicrobials  |
| CYLD    | 1540 CYLD lysin BRSS CDM       | 16 Antimicrobials |
| KLKB1   | 3818 kallikrein B KLK3 PKK F   | 4 Antimicrobials  |
| CST4    | 1472 cystatin S -              | 20 Antimicrobials |
| CSRP1   | 1465 cysteine ar CRP CRP1      | 1 Antimicrobials  |
| MAPK14  | 1432 mitogen-a CSBP CSBP       | 6 Antimicrobials  |
| JUN     | 3725 Jun proto- AP-1 AP1 c     | 1 Antimicrobials  |
| ITGAV   | 3685 integrin su CD51 MSK      | 2 Antimicrobials  |
| IRF5    | 3663 interferon SLEB10         | 7 Antimicrobials  |
| CCR6    | 1235 C-C motif BN-1 C-C        | 6 Antimicrobials  |
| IL12B   | 3593 interleukin CLMF CLM      | 5 Antimicrobials  |
| TLR8    | 51311 toll like rec CD288 X    | Antimicrobials    |
| GNLY    | 10578 granulysin D2S69E LA     | 2 Antimicrobials  |
| CD81    | 975 CD81 mole CVID6 S5.7       | 11 Antimicrobials |
| EIF2AK2 | 5610 eukaryotic EIF2AK1 LE     | 2 Antimicrobials  |
| APOM    | 55937 apolipoprc G3a HSPC3     | 6 Antimicrobials  |
| CACYBP  | 27101 calycyclin bi GIG5 PNA5  | 1 Antimicrobials  |
| NOD1    | 10392 nucleotide CARD4 CLF     | 7 Antimicrobials  |
| MAPK8   | 5599 mitogen-a JNK JNK-4       | 10 Antimicrobials |
| MAPK3   | 5595 mitogen-a ERK-1 ERK       | 16 Antimicrobials |
| BST2    | 684 bone marr CD317 TET        | 19 Antimicrobials |
| BPHL    | 670 biphenyl h BPH-RP M        | 6 Antimicrobials  |
| PLA2G2A | 5320 phospholiç MOM1 PL        | 1 Antimicrobials  |
| GRN     | 2896 granulin pr CLN11 GEF     | 17 Antimicrobials |
| NEWENTR | 192343 - - -                   | Antimicrobials    |
| PDGFRA  | 5156 platelet de CD140A PI     | 4 Antimicrobials  |
| GNAI1   | 2770 G protein s Gi            | 7 Antimicrobials  |
| WNT5A   | 7474 Wnt family h WNT5A        | 3 Antimicrobials  |
| FURIN   | 5045 furin, paire FUR PACE     | 15 Antimicrobials |
| ADAR    | 103 adenosine ADAR1 AG         | 1 Antimicrobials  |
| TYK2    | 7297 tyrosine kir IMD35 JTK    | 19 Antimicrobials |
| NOS2    | 4843 nitric oxide HEP-NOS      | 17 Antimicrobials |
| TRAF3   | 7187 TNF recept CAP-1 CAF      | 14 Antimicrobials |
| TPT1    | 7178 tumor prot HRF TCTP       | 13 Antimicrobials |
| TPM2    | 7169 tropomyos AMCD1 D         | 9 Antimicrobials  |
| NEO1    | 4756 neogenin 1 IGDC2 N        | 15 Antimicrobials |
| AHNAK   | 79026 AHNAK nu AHNAKRS         | 11 Antimicrobials |
| TLR1    | 7096 toll like rec CD281 TIL   | 4 Antimicrobials  |
| TK2     | 7084 thymidine MTDPS2 M        | 16 Antimicrobials |
| PRDX2   | 7001 peroxiredo HEL-S-2a       | 19 Antimicrobials |



|           |                               |                   |
|-----------|-------------------------------|-------------------|
| MX2       | 4600 MX dynam                 | 21 Antimicrobials |
| FGF2      | 2247 fibroblast cBFGF FGF-    | 4 Antimicrobials  |
| FGA       | 2243 fibrinogen Fib2          | 4 Antimicrobials  |
| TCF7L2    | 6934 transcripticTCF-4 TCF-   | 10 Antimicrobials |
| F2RL1     | 2150 F2R like tryGPR11 PAF    | 5 Antimicrobials  |
| TKFC      | 26007 triokinase cDAK NET4    | 11 Antimicrobials |
| MSR1      | 4481 macrophacCD204 SCA       | 8 Antimicrobials  |
| NFKBIZ    | 64332 NFKB inhibKBZ INAP      | 3 Antimicrobials  |
| LMBR1     | 64327 limb develACHP C7o      | 7 Antimicrobials  |
| EPPIN     | 57119 epididymalCT71 CT72     | 20 Antimicrobials |
| SRC       | 6714 SRC proto-ASV SRC1       | 20 Antimicrobials |
| MPO       | 4353 myelopero -              | 17 Antimicrobials |
| ELAVL1    | 1994 ELAV like FELAV1 HUF     | 19 Antimicrobials |
| ROBO3     | 64221 roundaboutHGPPS HG      | 11 Antimicrobials |
| SP1       | 6667 Sp1 transci-             | 12 Antimicrobials |
| SOD1      | 6647 superoxideALS ALS1 H     | 21 Antimicrobials |
| PDF       | 64146 peptide de-             | 16 Antimicrobials |
| DLL4      | 54567 delta like cAOS6 delta  | 15 Antimicrobials |
| ECD       | 11319 ecdysonecGCR2 HSG       | 10 Antimicrobials |
| SLC11A1   | 6556 solute carriLSH NRAV     | 2 Antimicrobials  |
| DMBT1     | 1755 deleted in GP340 SAC     | 10 Antimicrobials |
| STING1    | 340061 stimulator ERIS MITA   | 5 Antimicrobials  |
| SKIV2L    | 6499 Ski2 like R170A DDX      | 6 Antimicrobials  |
| SEMG2     | 6407 semenogelSGII            | 20 Antimicrobials |
| LTA       | 4049 lymphotoxLT TNFB TN      | 6 Antimicrobials  |
| DES       | 1674 desmin CDCD3 CS          | 2 Antimicrobials  |
| DCK       | 1633 deoxycytid -             | 4 Antimicrobials  |
| DAXX      | 1616 death domBING2 DAF       | 6 Antimicrobials  |
| TNFRSF10  | 8797 TNF receptAPO2 CD2       | 8 Antimicrobials  |
| TNFRSF10f | 8795 TNF receptCD262 DR       | 8 Antimicrobials  |
| EED       | 8726 embryonic COGIS HEE      | 11 Antimicrobials |
| CCL4      | 6351 C-C motif ACT2 AT74      | 17 Antimicrobials |
| LIMS1     | 3987 LIM zinc firPINCH PIN    | 2 Antimicrobials  |
| LALBA     | 3906 lactalbuminLYZG          | 12 Antimicrobials |
| APOBEC3f  | 164668 apolipoprcA3H ARP-     | 22 Antimicrobials |
| TMPRSS6   | 164656 transmemkIRIDA MT2     | 22 Antimicrobials |
| SPINK5    | 11005 serine pepLEKTI LETK    | 5 Antimicrobials  |
| MARCO     | 8685 macrophacSCARA2 SF       | 2 Antimicrobials  |
| BECN1     | 8678 beclin 1 ATG6 VPS3       | 17 Antimicrobials |
| TNFSF11   | 8600 TNF superlCD254 OD       | 13 Antimicrobials |
| KNG1      | 3827 kininogen BDK BK HM      | 3 Antimicrobials  |
| CSK       | 1445 C-terminal -             | 15 Antimicrobials |
| KLRK1     | 22914 killer cell leCD314 D12 | 12 Antimicrobials |
| KCNH2     | 3757 potassium ERG-1 ERG      | 7 Antimicrobials  |
| JUND      | 3727 JunD protcAP-1           | 19 Antimicrobials |
| JAK1      | 3716 Janus kinasJAK1A JAK     | 1 Antimicrobials  |
| CREB1     | 1385 cAMP respCREB CREE       | 2 Antimicrobials  |
| CLDN4     | 1364 claudin 4 CPE-R CPE      | 7 Antimicrobials  |
| CCL28     | 56477 C-C motif CCK1 MEC      | 5 Antimicrobials  |
| RNASE3    | 6037 ribonucleaECP RAF1 F     | 14 Antimicrobials |
| RN7SL1    | 6029 RNA comp7L1a 7SL R       | 14 Antimicrobials |
| IRF7      | 3665 interferon lMD39 IRF-    | 11 Antimicrobials |
| IREB2     | 3658 iron resporACO3 IRE-     | 15 Antimicrobials |
| ILK       | 3611 integrin linHEL-S-28     | 11 Antimicrobials |
| IL18      | 3606 interleukin IGIF IL-18   | 11 Antimicrobials |
| IL17A     | 3605 interleukin CTLA-8 CT    | 6 Antimicrobials  |
| LTB4R     | 1241 leukotrieneBLT1 BLTR     | 14 Antimicrobials |
| APOBEC3A  | 200315 apolipoprcA3A ARP3     | 22 Antimicrobials |

|          |                               |                   |
|----------|-------------------------------|-------------------|
| MASP2    | 10747 mannan bi MAP19 MA      | 1 Antimicrobials  |
| TRIM27   | 5987 tripartite r RFP RNF76   | 6 Antimicrobials  |
| RELA     | 5970 RELA protcCMCU NFk       | 11 Antimicrobials |
| IL7R     | 3575 interleukin CD127 CD     | 5 Antimicrobials  |
| IL1A     | 3552 interleukin IL-1 alpha   | 2 Antimicrobials  |
| PTX3     | 5806 pentraxin 3TNFAIP5 T     | 3 Antimicrobials  |
| IFNAR2   | 3455 interferon IFN-R IFN-    | 21 Antimicrobials |
| IFN1@    | 3438 - IFNA                   | 9 Antimicrobials  |
| SYTL1    | 84958 synaptotagJFC1 SLP1     | 1 Antimicrobials  |
| APOBEC3C | 27350 apolipoprcA3C APOB      | 22 Antimicrobials |
| DDX17    | 10521 DEAD-boxP72 RH70        | 22 Antimicrobials |
| PTGS2    | 5743 prostaglan COX-2 CO      | 1 Antimicrobials  |
| HTR1A    | 3350 5-hydroxy15-HT-1A 5      | 5 Antimicrobials  |
| SEPTIN7  | 989 septin 7 CDC10 CD         | 7 Antimicrobials  |
| CD40LG   | 959 CD40 liganCD154 CDX       | Antimicrobials    |
| CD14     | 929 CD14 mole-                | 5 Antimicrobials  |
| CD8A     | 925 CD8a moleCD8 Leu2         | 2 Antimicrobials  |
| CD4      | 920 CD4 molecCD4mut           | 12 Antimicrobials |
| MASP1    | 5648 mannan bi 3MC1 CRA       | 3 Antimicrobials  |
| PROC     | 5624 protein C, iAPC PC PR    | 2 Antimicrobials  |
| MAP2K2   | 5605 mitogen-aCFC4 MAP        | 19 Antimicrobials |
| MAP2K1   | 5604 mitogen-aCFC3 MAP        | 15 Antimicrobials |
| HRG      | 3273 histidine ricHPRG HRG    | 3 Antimicrobials  |
| NDRG1    | 10397 N-myc doCAP43 CM        | 8 Antimicrobials  |
| IRF9     | 10379 interferon IRF-9 ISGF   | 14 Antimicrobials |
| TRIM22   | 10346 tripartite rGPSTAF50    | 11 Antimicrobials |
| LANCL1   | 10314 LanC like 1GPR69A p     | 2 Antimicrobials  |
| PPP4C    | 5531 protein phPP-X PP4 F     | 16 Antimicrobials |
| HMOX1    | 3162 heme oxygHMOX1D H        | 22 Antimicrobials |
| HMGB1    | 3146 high mobilHMG-1 HM       | 13 Antimicrobials |
| HLA-B    | 3106 major histcAS B-4901     | 6 Antimicrobials  |
| RNASE7   | 84659 ribonucleaRAE1          | 14 Antimicrobials |
| ABCC4    | 10257 ATP bindinMOAT-B N      | 13 Antimicrobials |
| HGF      | 3082 hepatocyteDFNB39 F-      | 7 Antimicrobials  |
| HDAC1    | 3065 histone deGON-10 H       | 1 Antimicrobials  |
| IFNLR1   | 163702 interferon ICRF2/12 IF | 1 Antimicrobials  |
| PLSCR1   | 5359 phospholipMMTRA1B        | 3 Antimicrobials  |
| B2M      | 567 beta-2-miIMD43            | 15 Antimicrobials |
| BACH2    | 60468 BTB domaiBTBD25 IM      | 6 Antimicrobials  |
| TANK     | 10010 TRAF familI-TRAF ITR    | 2 Antimicrobials  |
| PIK3CG   | 5294 phosphaticPI3CG PI3k     | 7 Antimicrobials  |
| ARRB1    | 408 arrestin beARRB1 ARR1     | 11 Antimicrobials |
| RSAD2    | 91543 radical S-a2510004L0    | 2 Antimicrobials  |
| STAB2    | 55576 stabilin 2 FEEL2 FELE   | 12 Antimicrobials |
| TBK1     | 29110 TANK bindFTDALS4 II     | 12 Antimicrobials |
| PDYN     | 5173 prodynorpADCA PEN        | 20 Antimicrobials |
| PDGFRB   | 5159 platelet deCD140B IB     | 5 Antimicrobials  |
| PDCD1    | 5133 programmCD279 PD-        | 2 Antimicrobials  |
| PCSK2    | 5126 proprotein NEC 2 NEC     | 20 Antimicrobials |
| PCSK1    | 5122 proprotein BMIQ12 NI     | 5 Antimicrobials  |
| ARG2     | 384 arginase 2 -              | 14 Antimicrobials |
| AQP9     | 366 aquaporin AQP-9 Hs1       | 15 Antimicrobials |
| FASLG    | 356 Fas ligand ALPS1B AP      | 1 Antimicrobials  |
| APOH     | 350 apolipoprcB2G1 B2GF       | 17 Antimicrobials |
| BIRC5    | 332 baculoviralAPI4 EPR-1     | 17 Antimicrobials |
| ANXA6    | 309 annexin A6ANX6 CBP        | 5 Antimicrobials  |
| IL22     | 50616 interleukin IL-21 IL-22 | 12 Antimicrobials |
| VTN      | 7448 vitronectin V75 VN VN    | 17 Antimicrobials |

|          |                     |             |                   |
|----------|---------------------|-------------|-------------------|
| VIM      | 7431 vimentin       | -           | 10 Antimicrobials |
| VCAM1    | 7412 vascular ce    | CD106 INC   | 1 Antimicrobials  |
| PRDX1    | 5052 peroxiredo     | MSP23 NK    | 1 Antimicrobials  |
| GFAP     | 2670 glial fibrilla | ALXDRD      | 17 Antimicrobials |
| GBP2     | 2634 guanylate      | -           | 1 Antimicrobials  |
| ALB      | 213 albumin         | HSA PROO    | 4 Antimicrobials  |
| SLC29A3  | 55315 solute carri  | ENT3 HCL    | 10 Antimicrobials |
| OAS1     | 4938 2'-5'-oligo    | E18/E16 IFI | 12 Antimicrobials |
| AGER     | 177 advanced        | AGE SCAI    | 6 Antimicrobials  |
| UNC93B1  | 81622 unc-93 ho     | IAE1 UNC    | 11 Antimicrobials |
| TNFSF4   | 7292 TNF super      | CD134L CE   | 1 Antimicrobials  |
| NOS1     | 4842 nitric oxide   | IHPS1 N-N   | 12 Antimicrobials |
| ACTG1    | 71 actin gamr       | ACT ACTG    | 17 Antimicrobials |
| ACTA1    | 58 actin alpha      | ACTA ASM    | 1 Antimicrobials  |
| ACO1     | 48 aconitase        | 1ACONS HE   | 9 Antimicrobials  |
| SERPINA3 | 12 serpin fam       | AACT ACT    | 14 Antimicrobials |
| CXCR1    | 3577 C-X-C mo       | C-C C-C-C   | 2 Antimicrobials  |
| CCL15    | 6359 C-C motif      | HCC-2 HM    | 17 Antimicrobials |
| CCL14    | 6358 C-C motif      | CC-1 CC-3   | 17 Antimicrobials |
| CCL4     | 6351 C-C motif      | ACT2 AT74   | 17 Antimicrobials |
| CCL16    | 6360 C-C motif      | CKb12 HCC   | 17 Antimicrobials |
| CCL19    | 6363 C-C motif      | CKb11 ELC   | 9 Antimicrobials  |
| CCL13    | 6357 C-C motif      | CKb10 MC    | 17 Antimicrobials |
| CCL18    | 6362 C-C motif      | AMAC-1 A    | 17 Antimicrobials |
| CCL17    | 6361 C-C motif      | A-152E5.3   | 16 Antimicrobials |
| CCL26    | 10344 C-C motif     | IMAC MIP-   | 7 Antimicrobials  |
| CCL22    | 6367 C-C motif      | A-152E5.1   | 16 Antimicrobials |
| CCR3     | 1232 C-C motif      | C C CKR3 C  | 3 Antimicrobials  |
| CCL28    | 56477 C-C motif     | CCK1 MEC    | 5 Antimicrobials  |
| CCL4L1   | 388372 C-C motif    | AT744.2 CC  | 17 Antimicrobials |
| ACKR2    | 1238 atypical ch    | CCBP2 CCF   | 3 Antimicrobials  |
| CCR7     | 1236 C-C motif      | BLR2 CC-C   | 17 Antimicrobials |
| CCL27    | 10850 C-C motif     | ALP CTACH   | 9 Antimicrobials  |
| CCR8     | 1237 C-C motif      | CC-CKR-8    | 3 Antimicrobials  |
| ACKR4    | 51554 atypical ch   | CC-CKR-1    | 3 Antimicrobials  |
| CCR10    | 2826 C-C motif      | GPR2        | 17 Antimicrobials |
| CCL2     | 6347 C-C motif      | GDCF-2 HCC  | 17 Antimicrobials |
| CCL21    | 6366 C-C motif      | 6Ckine CKb  | 9 Antimicrobials  |
| CCL7     | 6354 C-C motif      | FIC MARC    | 17 Antimicrobials |
| CCL5     | 6352 C-C motif      | D17S136E    | 17 Antimicrobials |
| CCL3     | 6348 C-C motif      | GOS19-1 LI  | 17 Antimicrobials |
| CCL20    | 6364 C-C motif      | CKb4 Exod   | 2 Antimicrobials  |
| CCL11    | 6356 C-C motif      | SCYA11      | 17 Antimicrobials |
| CCR5     | 1234 C-C motif      | CC-CKR-5    | 3 Antimicrobials  |
| CCL23    | 6368 C-C motif      | CK-BETA-1   | 17 Antimicrobials |
| CCL25    | 6370 C-C motif      | Ckb15 SCY   | 19 Antimicrobials |
| CCL1     | 6346 C-C motif      | I-309 P500  | 17 Antimicrobials |
| CCL3L3   | 414062 C-C motif    | 464.2 D17S  | 17 Antimicrobials |
| CCL4L2   | 9560 C-C motif      | AT744.2 CC  | 17 Antimicrobials |
| CXCL12   | 6387 C-X-C mo       | IRH PBSF S  | 10 Antimicrobials |
| XCL1     | 6375 X-C motif      | ATAC LPTN   | 1 Antimicrobials  |
| CCL8     | 6355 C-C motif      | HC14 MCP    | 17 Antimicrobials |
| CCL3L1   | 6349 C-C motif      | 464.2 D17S  | 17 Antimicrobials |
| CCR1     | 1230 C-C motif      | CD191 CKF   | 3 Antimicrobials  |
| CCL24    | 6369 C-C motif      | Ckb-6 MPI   | 7 Antimicrobials  |
| XCL2     | 6846 X-C motif      | SCM-1b SC   | 1 Antimicrobials  |
| CXCL1    | 2919 C-X-C mo       | FSP GRO1    | 4 Antimicrobials  |
| CXCL10   | 3627 C-X-C mo       | C7 IFI10 IN | 4 Antimicrobials  |

|          |                               |                        |
|----------|-------------------------------|------------------------|
| CXCR4    | 7852 C-X-C mo·CD184 D25       | 2 Antimicrobials       |
| CXCL2    | 2920 C-X-C mo·CINC-2a G       | 4 Antimicrobials       |
| CXCR6    | 10663 C-X-C mo·BONZO C        | 3 Antimicrobials       |
| CCR4     | 1233 C-C motif CC-CKR-4       | 3 Antimicrobials       |
| CXCL11   | 6373 C-X-C mo·H174 I-TA       | 4 Antimicrobials       |
| TFAFA5   | 25817 TFAFA chenFAM19A5       | 22 Antimicrobials      |
| TFAFA3   | 284467 TFAFA chenFAM19A3      | 1 Antimicrobials       |
| TFAFA4   | 151647 TFAFA chenFAM19A4      | 3 Antimicrobials       |
| TFAFA1   | 407738 TFAFA chenFAM19A1      | 3 Antimicrobials       |
| TFAFA2   | 338811 TFAFA chenFAM19A2      | 12 Antimicrobials      |
| CCL15-CC | 348249 CCL15-CC CCL15 HC      | 17 Antimicrobials      |
| IL6      | 3569 interleukin BSF-2 BSF2   | 7 Antimicrobials       |
| TNF      | 7124 tumor necrDIF TNF-al     | 6 Antimicrobials       |
| IL1B     | 3553 interleukin IL-1 IL1-BE  | 2 Antimicrobials       |
| IL18     | 3606 interleukin IGIF IL-18 I | 11 Antimicrobials      |
| PTK2B    | 2185 protein tyrCADTK CA      | 8 Antimicrobials       |
| VEGFA    | 7422 vascular erMVCD1 VE      | 6 Antimicrobials       |
| IL4      | 3565 interleukin BCGF-1 BC    | 5 Antimicrobials       |
| CDH1     | 999 cadherin 1 Arc-1 BCD      | 16 Antimicrobials      |
| CD40     | 958 CD40 moleBp50 CDW         | 20 Antimicrobials      |
| DEFB103B | 55894 defensin bBD-3 DEFE     | 8 Antimicrobials       |
| F2RL1    | 2150 F2R like tryGPR11 PAF    | 5 Antimicrobials       |
| MMP9     | 4318 matrix metCLG4B GEL      | 20 Antimicrobials      |
| LTBP1    | 4052 latent trans-            | 2 Antimicrobials       |
| DEFB4A   | 1673 defensin bBD-2 DEFE      | 8 Antimicrobials       |
| TNFSF10  | 8743 TNF superIAPOL2 Ap       | 3 Antimicrobials       |
| IL13     | 3596 interleukin IL-13 P600   | 5 Antimicrobials       |
| IL10     | 3586 interleukin CSIF GVHC    | 1 Antimicrobials       |
| IL2      | 3558 interleukin IL-2 TCGF    | 4 Antimicrobials       |
| PPARG    | 5468 peroxisomCMT1 GLM        | 3 Antimicrobials       |
| FGR      | 2268 FGR protoSRC2 c-fgr      | 1 Antimicrobials       |
| MIF      | 4282 macrophagGIF GLIF M      | 22 Antimicrobials      |
| CRP      | 1401 C-reactive PTX1          | 1 Antimicrobials       |
| JAK2     | 3717 Janus kinaseJTK10 THC    | 9 Antimicrobials       |
| IL1A     | 3552 interleukin IL-1 alpha   | 2 Antimicrobials       |
| PTK2     | 5747 protein tyrFADK FAK      | 8 Antimicrobials       |
| PTGDR    | 5729 prostaglanAS1 ASRT1      | 14 Antimicrobials      |
| CD86     | 942 CD86 moleB7-2 B7.2 E      | 3 Antimicrobials       |
| HCK      | 3055 HCK protoJTK9 p59H       | 20 Antimicrobials      |
| ARRB1    | 408 arrestin beARB1 ARR1      | 11 Antimicrobials      |
| GNAI1    | 2770 G protein sGi            | 7 Antimicrobials       |
| VDR      | 7421 vitamin D rNR1I1 PPP     | 12 Antimicrobials      |
| OLR1     | 4973 oxidized loCLEC8A LC     | 12 Antimicrobials      |
| GRK2     | 156 G protein- ADRBK1 B/      | 11 Antimicrobials      |
| TXK      | 7294 TXK tyrosinBTKL PSCT     | 4 Antimicrobials       |
| RNASE2   | 6036 ribonucleaEDN RAF3       | 14 Antimicrobials      |
| CD79A    | 973 CD79a moIGA MB-1          | 19 BCRSignalingPathway |
| CD79B    | 974 CD79b moAGM6 B29          | 17 BCRSignalingPathway |
| LYN      | 4067 LYN protoJTK8 p53Ly      | 8 BCRSignalingPathway  |
| SYK      | 6850 spleen assocp72-Syk      | 9 BCRSignalingPathway  |
| BTK      | 695 Bruton tyrcAGMX1 ATX      | BCRSignalingPathway    |
| BLNK     | 29760 B cell linkeAGM4 BAS    | 10 BCRSignalingPathway |
| VAV3     | 10451 vav guanin-             | 1 BCRSignalingPathway  |
| VAV1     | 7409 vav guaninVAV            | 19 BCRSignalingPathway |
| VAV2     | 7410 vav guaninVAV-2          | 9 BCRSignalingPathway  |
| RAC1     | 5879 Rac family MIG5 MRD      | 7 BCRSignalingPathway  |
| RAC2     | 5880 Rac family EN-7 Gx H     | 22 BCRSignalingPathway |
| RAC3     | 5881 Rac family -             | 17 BCRSignalingPathway |

|         |                              |                        |
|---------|------------------------------|------------------------|
| PPP3CA  | 5530 protein phACCIID CA     | 4 BCRSignalingPathway  |
| PPP3CB  | 5532 protein phCALNA2 C      | 10 BCRSignalingPathway |
| PPP3CC  | 5533 protein phCALNA3 C      | 8 BCRSignalingPathway  |
| CHP1    | 11261 calcineurin CHP SLC9A  | 15 BCRSignalingPathway |
| PPP3R1  | 5534 protein phCALNB1 CI     | 2 BCRSignalingPathway  |
| PPP3R2  | 5535 protein phPPP3RL        | 9 BCRSignalingPathway  |
| CHP2    | 63928 calcineurin -          | 16 BCRSignalingPathway |
| NFAT5   | 10725 nuclear facNF-AT5 NF   | 16 BCRSignalingPathway |
| NFATC1  | 4772 nuclear facNF-ATC NI    | 18 BCRSignalingPathway |
| NFATC2  | 4773 nuclear facNFAT1 NF     | 20 BCRSignalingPathway |
| NFATC3  | 4775 nuclear facNF-AT4c N    | 16 BCRSignalingPathway |
| NFATC4  | 4776 nuclear facNF-AT3 NF    | 14 BCRSignalingPathway |
| HRAS    | 3265 HRas protcC-BAS/HA      | 11 BCRSignalingPathway |
| KRAS    | 3845 KRAS protc'C-K-RAS C    | 12 BCRSignalingPathway |
| NRAS    | 4893 NRAS prot ALPS4 CMI     | 1 BCRSignalingPathway  |
| FOS     | 2353 Fos proto- AP-1 C-FC    | 14 BCRSignalingPathway |
| JUN     | 3725 Jun proto- AP-1 AP1 C   | 1 BCRSignalingPathway  |
| CARD11  | 84433 caspase reBENTA BIM    | 7 BCRSignalingPathway  |
| BCL10   | 8915 BCL10 imrCARMEN C       | 1 BCRSignalingPathway  |
| MALT1   | 10892 MALT1 parIMD12 ML      | 18 BCRSignalingPathway |
| CHUK    | 1147 componenIKBA IKK-       | 10 BCRSignalingPathway |
| IKKB    | 3551 inhibitor ofIKK-beta Ik | 8 BCRSignalingPathway  |
| IKKBG   | 8517 inhibitor ofAMCBX1 EX   | BCRSignalingPathway    |
| NFKB1   | 4790 nuclear facCVID12 EB    | 4 BCRSignalingPathway  |
| RELA    | 5970 RELA protcCMCU NF       | 11 BCRSignalingPathway |
| NFKBIA  | 4792 NFKB inhibEDAID2 IK     | 14 BCRSignalingPathway |
| NFKBIB  | 4793 NFKB inhibIKBB TRIP9    | 19 BCRSignalingPathway |
| NFKBIE  | 4794 NFKB inhibIKBE          | 6 BCRSignalingPathway  |
| CD81    | 975 CD81 moleCVID6 S5.7      | 11 BCRSignalingPathway |
| CD19    | 930 CD19 moleB4 CVID3        | 16 BCRSignalingPathway |
| CR2     | 1380 complemeC3DR CD2        | 1 BCRSignalingPathway  |
| PIK3R5  | 23533 phosphoinF7300381      | 17 BCRSignalingPathway |
| PIK3R1  | 5295 phosphoinAGM7 GRE       | 5 BCRSignalingPathway  |
| PIK3R2  | 5296 phosphoinMPPH MPF       | 19 BCRSignalingPathway |
| PIK3R3  | 8503 phosphoinp55 p55-G      | 1 BCRSignalingPathway  |
| PIK3CA  | 5290 phosphaticCLAPO CL      | 3 BCRSignalingPathway  |
| PIK3CB  | 5291 phosphaticP110BETA      | 3 BCRSignalingPathway  |
| PIK3CD  | 5293 phosphaticAPDS IMD      | 1 BCRSignalingPathway  |
| PIK3CG  | 5294 phosphaticPI3CG PI3k    | 7 BCRSignalingPathway  |
| AKT3    | 10000 AKT serine.MPPH MPF    | 1 BCRSignalingPathway  |
| AKT1    | 207 AKT serine.AKT CWS6      | 14 BCRSignalingPathway |
| AKT2    | 208 AKT serine.HIHGHH P      | 19 BCRSignalingPathway |
| GSK3B   | 2932 glycogen s-             | 3 BCRSignalingPathway  |
| INPP5D  | 3635 inositol poSHIP SHIP-   | 2 BCRSignalingPathway  |
| CD22    | 933 CD22 moleSIGLEC-2 S      | 19 BCRSignalingPathway |
| CD72    | 971 CD72 moleCD72b LYE       | 9 BCRSignalingPathway  |
| PTPN6   | 5777 protein tyrHCP HCPH     | 12 BCRSignalingPathway |
| LILRB3  | 11025 leukocyte iCD85A HL    | 19 BCRSignalingPathway |
| FCGR2B  | 2213 Fc fragmerCD32 CD3      | 1 BCRSignalingPathway  |
| RASGRP3 | 25780 RAS guanyGRP3          | 2 BCRSignalingPathway  |
| PLCG2   | 5336 phospholipAPLAID FC     | 16 BCRSignalingPathway |
| PRKCB   | 5579 protein kinPKC-beta P   | 16 BCRSignalingPathway |
| IFITM1  | 8519 interferon i9-27 CD22   | 11 BCRSignalingPathway |
| IGH     | 3492 immunoglGD1 IGH.1       | 14 BCRSignalingPathway |
| IGHA1   | 3493 immunoglIgA1            | 14 BCRSignalingPathway |
| IGHA2   | 3494 immunogl-               | 14 BCRSignalingPathway |
| IGHD    | 3495 immunogl-               | 14 BCRSignalingPathway |
| IGHD1-1 | 28510 immunoglIGHD11         | 14 BCRSignalingPathway |

|           |                          |                        |
|-----------|--------------------------|------------------------|
| IGHD1-14  | 28508 immunoglDM2 IGHD   | 14 BCRSignalingPathway |
| IGHD1-20  | 28507 immunoglIGHD120    | 14 BCRSignalingPathway |
| IGHD1-26  | 28506 immunoglIGHD126    | 14 BCRSignalingPathway |
| IGHD1-7   | 28509 immunoglDM1 IGHD   | 14 BCRSignalingPathway |
| IGHD2-15  | 28503 immunoglD2 IGHD21  | 14 BCRSignalingPathway |
| IGHD2-2   | 28505 immunoglIGHD22     | 14 BCRSignalingPathway |
| IGHD2-21  | 28502 immunoglIGHD221    | 14 BCRSignalingPathway |
| IGHD2-8   | 28504 immunoglDLR1 IGHC  | 14 BCRSignalingPathway |
| IGHD3-10  | 28499 immunoglDXP'1 IGHI | 14 BCRSignalingPathway |
| IGHD3-16  | 28498 immunoglIGHD316    | 14 BCRSignalingPathway |
| IGHD3-22  | 28497 immunoglIGHD322    | 14 BCRSignalingPathway |
| IGHD3-3   | 28501 immunoglDXP4 IGHC  | 14 BCRSignalingPathway |
| IGHD3-9   | 28500 immunoglDXP1 IGHC  | 14 BCRSignalingPathway |
| IGHD4-11  | 28495 immunoglDA1 IGHD4  | 14 BCRSignalingPathway |
| IGHD4-17  | 28494 immunoglIGHD417    | 14 BCRSignalingPathway |
| IGHD4-23  | 28493 immunoglIGHD423    | 14 BCRSignalingPathway |
| IGHD4-4   | 28496 immunoglDA4 IGHD4  | 14 BCRSignalingPathway |
| IGHD5-12  | 28491 immunoglDK1 IGHD5  | 14 BCRSignalingPathway |
| IGHD5-18  | 28490 immunoglIGHD518    | 14 BCRSignalingPathway |
| IGHD5-24  | 28489 immunoglIGHD524    | 14 BCRSignalingPathway |
| IGHD5-5   | 28492 immunoglDK4 IGHD5  | 14 BCRSignalingPathway |
| IGHD6-13  | 28487 immunoglDN1 IGHD6  | 14 BCRSignalingPathway |
| IGHD6-19  | 28486 immunoglIGHD619    | 14 BCRSignalingPathway |
| IGHD6-25  | 28485 immunoglIGHD625    | 14 BCRSignalingPathway |
| IGHD6-6   | 28488 immunoglD(N4) IGHI | 14 BCRSignalingPathway |
| IGHD7-27  | 28484 immunoglDHQ52 IGH  | 14 BCRSignalingPathway |
| IGHE      | 3497 immunoglIgE         | 14 BCRSignalingPathway |
| IGHG1     | 3500 immunogl-           | 14 BCRSignalingPathway |
| IGHG2     | 3501 immunogl-           | 14 BCRSignalingPathway |
| IGHG3     | 3502 immunoglIgG3        | 14 BCRSignalingPathway |
| IGHG4     | 3503 immunogl-           | 14 BCRSignalingPathway |
| IGHJ1     | 28483 immunoglJH1        | 14 BCRSignalingPathway |
| IGHJ2     | 28481 immunoglJH2        | 14 BCRSignalingPathway |
| IGHJ3     | 28479 immunoglJH3b       | 14 BCRSignalingPathway |
| IGHJ4     | 28477 immunoglJH4b       | 14 BCRSignalingPathway |
| IGHJ5     | 28476 immunoglJH5b       | 14 BCRSignalingPathway |
| IGHJ6     | 28475 immunoglJH6b       | 14 BCRSignalingPathway |
| IGHM      | 3507 immunoglAGM1 MU     | 14 BCRSignalingPathway |
| IGH       | 3492 immunoglGD1 IGH.1   | 14 BCRSignalingPathway |
| IGHV1-18  | 28468 immunoglIGHV118    | 14 BCRSignalingPathway |
| IGHV1-2   | 28474 immunoglIGHV12 V3  | 14 BCRSignalingPathway |
| IGHV1-24  | 28467 immunoglIGHV124 V  | 14 BCRSignalingPathway |
| IGHV1-3   | 28473 immunoglIGHV13 VI  | 14 BCRSignalingPathway |
| IGHV1-45  | 28466 immunoglIGHV145 V  | 14 BCRSignalingPathway |
| IGHV1-46  | 28465 immunoglIGHV146    | 14 BCRSignalingPathway |
| IGHV1-58  | 28464 immunoglIGHV158 V  | 14 BCRSignalingPathway |
| IGHV1-69  | 28461 immunoglIGHV1-E IC | 14 BCRSignalingPathway |
| IGHV1-8   | 28472 immunoglIGHV18     | 14 BCRSignalingPathway |
| IGHV1-38- | 28460 immunoglIGHV1-C IC | 14 BCRSignalingPathway |
| IGHV1-69- | 28458 immunoglIGHV1-F IC | 14 BCRSignalingPathway |
| IGHV2-26  | 28455 immunoglIGHV226 V  | 14 BCRSignalingPathway |
| IGHV2-5   | 28457 immunoglIGHV25 VF  | 14 BCRSignalingPathway |
| IGHV2-70  | 28454 immunoglIGHV270 V  | 14 BCRSignalingPathway |
| IGHV3-11  | 28450 immunoglIGHV311 V  | 14 BCRSignalingPathway |
| IGHV3-13  | 28449 immunoglIGHV313    | 14 BCRSignalingPathway |
| IGHV3-15  | 28448 immunoglIGHV315 V  | 14 BCRSignalingPathway |
| IGHV3-16  | 28447 immunoglIGHV316 V  | 14 BCRSignalingPathway |
| IGHV3-20  | 28445 immunoglIGHV320 V  | 14 BCRSignalingPathway |

|           |                          |                        |
|-----------|--------------------------|------------------------|
| IGHV3-21  | 28444 immunoglGHV321 V   | 14 BCRSignalingPathway |
| IGHV3-23  | 28442 immunoglDP47 IGHV  | 14 BCRSignalingPathway |
| IGHV3-30  | 28439 immunoglGHV330 V   | 14 BCRSignalingPathway |
| IGHV3-30- | 57290 immunoglGHV3-3 IC  | 14 BCRSignalingPathway |
| IGHV3-30- | 89770 immunoglGHV3-3 IC  | 14 BCRSignalingPathway |
| IGHV3-33  | 28434 immunoglGHV333 V   | 14 BCRSignalingPathway |
| IGHV3-35  | 28432 immunoglGHV335 V   | 14 BCRSignalingPathway |
| IGHV3-38  | 28429 immunoglGHV338 V   | 14 BCRSignalingPathway |
| IGHV3-43  | 28426 immunoglGHV343 V   | 14 BCRSignalingPathway |
| IGHV3-48  | 28424 immunoglGHV348 V   | 14 BCRSignalingPathway |
| IGHV3-49  | 28423 immunoglGHV349 V   | 14 BCRSignalingPathway |
| IGHV3-53  | 28420 immunoglGHV353 V   | 14 BCRSignalingPathway |
| IGHV3-64  | 28414 immunoglGHV364 V   | 14 BCRSignalingPathway |
| IGHV3-66  | 28412 immunoglGHV366 V   | 14 BCRSignalingPathway |
| IGHV3-7   | 28452 immunoglGHV37 Vf   | 14 BCRSignalingPathway |
| IGHV3-72  | 28410 immunoglGHV372 V   | 14 BCRSignalingPathway |
| IGHV3-73  | 28409 immunoglGHV373 V   | 14 BCRSignalingPathway |
| IGHV3-74  | 28408 immunoglGHV374 V   | 14 BCRSignalingPathway |
| IGHV3-9   | 28451 immunoglGHV39 Vf   | 14 BCRSignalingPathway |
| IGHV3-38- | 28404 immunoglGHV3-D IC  | 14 BCRSignalingPathway |
| IGHV3-69- | 28402 immunoglGH IGHM    | 14 BCRSignalingPathway |
| IGHV4-28  | 28400 immunoglGHV428 V   | 14 BCRSignalingPathway |
| IGHV4-30- | 28399 immunoglGHV4-3     | 14 BCRSignalingPathway |
| IGHV4-30- | 28398 immunoglGHV4-3 IC  | 14 BCRSignalingPathway |
| IGHV4-30- | 28397 immunoglGHV4-3 IC  | 14 BCRSignalingPathway |
| IGHV4-31  | 28396 immunoglGHV431     | 14 BCRSignalingPathway |
| IGHV4-34  | 28395 immunoglGHV434 V   | 14 BCRSignalingPathway |
| IGHV4-39  | 28394 immunoglGHV439 V   | 14 BCRSignalingPathway |
| IGHV4-4   | 28401 immunoglGHV44 Vf   | 14 BCRSignalingPathway |
| IGHV4-59  | 28392 immunoglGHV459 V   | 14 BCRSignalingPathway |
| IGHV4-61  | 28391 immunoglGHV461 V   | 14 BCRSignalingPathway |
| IGHV4-38- | 28389 immunoglGHV4-B IC  | 14 BCRSignalingPathway |
| IGHV5-51  | 28388 immunoglGHV551 V   | 14 BCRSignalingPathway |
| IGHV5-10- | 28386 immunoglGHV5-A IC  | 14 BCRSignalingPathway |
| IGHV6-1   | 28385 immunoglGHV61 Vf   | 14 BCRSignalingPathway |
| IGHV7-4-1 | 57289 immunoglGHV7-41    | 14 BCRSignalingPathway |
| IGHV7-81  | 28378 immunoglGHV781     | 14 BCRSignalingPathway |
| IGK       | 50802 immunoglIGK@       | 2 BCRSignalingPathway  |
| IGKC      | 3514 immunoglHCAK1 IGK   | 2 BCRSignalingPathway  |
| IGKDEL    | 3515 immunoglIGKDE       | 2 BCRSignalingPathway  |
| IGKJ      | 7842 - IGKJ@             | 2 BCRSignalingPathway  |
| IGKJ1     | 28950 immunoglJ1         | 2 BCRSignalingPathway  |
| IGKJ2     | 28949 immunoglJ2         | 2 BCRSignalingPathway  |
| IGKJ3     | 28948 immunoglJ3         | 2 BCRSignalingPathway  |
| IGKJ4     | 28947 immunoglJ4         | 2 BCRSignalingPathway  |
| IGKJ5     | 28946 immunoglJ5         | 2 BCRSignalingPathway  |
| IGKV@     | 3519 - IGKV IGKV:        | 2 BCRSignalingPathway  |
| IGKV1-12  | 28940 immunoglIGKV112 L: | 2 BCRSignalingPathway  |
| IGKV1-13  | 28939 immunoglIGKV113 L: | 2 BCRSignalingPathway  |
| IGKV1-16  | 28938 immunoglIGKV116 L: | 2 BCRSignalingPathway  |
| IGKV1-17  | 28937 immunoglA30 IGKV1  | 2 BCRSignalingPathway  |
| IGKV1-27  | 28935 immunoglA20 IGKV1  | 2 BCRSignalingPathway  |
| IGKV1-33  | 28933 immunoglIGKV133 O  | 2 BCRSignalingPathway  |
| IGKV1-37  | 28931 immunoglIGKV137 O  | 2 BCRSignalingPathway  |
| IGKV1-39  | 28930 immunoglIGKV139 O  | 2 BCRSignalingPathway  |
| IGKV1-5   | 28299 immunoglIGKV IGKV: | 2 BCRSignalingPathway  |
| IGKV1-6   | 28943 immunoglIGKV16 L1: | 2 BCRSignalingPathway  |
| IGKV1-8   | 28942 immunoglIGKV18 L9  | 2 BCRSignalingPathway  |

|           |                           |                        |
|-----------|---------------------------|------------------------|
| IGKV1-9   | 28941 immunogl IGKV19 L8  | 2 BCRSignalingPathway  |
| IGKV1D-12 | 28903 immunogl IGKV1D12   | 2 BCRSignalingPathway  |
| IGKV1D-13 | 28902 immunogl IGKV1D13   | 2 BCRSignalingPathway  |
| IGKV1D-16 | 28901 immunogl IGKV1D16   | 2 BCRSignalingPathway  |
| IGKV1D-17 | 28900 immunogl IGKV1D17   | 2 BCRSignalingPathway  |
| IGKV1D-33 | 28896 immunogl IGKV1D33   | 2 BCRSignalingPathway  |
| IGKV1D-37 | 28894 immunogl IGKV1D37   | 2 BCRSignalingPathway  |
| IGKV1D-39 | 28893 immunogl IGKV1D39   | 2 BCRSignalingPathway  |
| IGKV1D-42 | 28892 immunogl IGKV1D42   | 2 BCRSignalingPathway  |
| IGKV1D-43 | 28891 immunogl IGKV1D43   | 2 BCRSignalingPathway  |
| IGKV1D-8  | 28904 immunogl IGKV1D8 L  | 2 BCRSignalingPathway  |
| IGKV2-24  | 28923 immunogl A23 IGKV2  | 2 BCRSignalingPathway  |
| IGKV2-28  | 28921 immunogl A19 IGKV2  | 2 BCRSignalingPathway  |
| IGKV2-30  | 28919 immunogl A17 IGKV2  | 2 BCRSignalingPathway  |
| IGKV2-40  | 28916 immunogl IGKV240 O  | 2 BCRSignalingPathway  |
| IGKV2D-24 | 28885 immunogl A7 IGKV2D  | 2 BCRSignalingPathway  |
| IGKV2D-28 | 28883 immunogl A3 IGKV2D  | 2 BCRSignalingPathway  |
| IGKV2D-29 | 28882 immunogl A2a A2c IG | 2 BCRSignalingPathway  |
| IGKV2D-30 | 28881 immunogl A1 IGKV2D  | 2 BCRSignalingPathway  |
| IGKV2D-40 | 28878 immunogl IGKV2D40   | 2 BCRSignalingPathway  |
| IGKV3-11  | 28914 immunogl IGKV311 L6 | 2 BCRSignalingPathway  |
| IGKV3-15  | 28913 immunogl IGKV315 L2 | 2 BCRSignalingPathway  |
| IGKV3-20  | 28912 immunogl 13K18 A27  | 2 BCRSignalingPathway  |
| IGKV3-7   | 28915 immunogl IGKV37 L10 | 2 BCRSignalingPathway  |
| IGKV3D-11 | 28876 immunogl IGKV3D11   | 2 BCRSignalingPathway  |
| IGKV3D-15 | 28875 immunogl IGKV3D15   | 2 BCRSignalingPathway  |
| IGKV3D-20 | 28874 immunogl A11 A11a I | 2 BCRSignalingPathway  |
| IGKV3D-7  | 28877 immunogl IGKV3D7 L  | 2 BCRSignalingPathway  |
| IGKV4-1   | 28908 immunogl B3 IGKV41  | 2 BCRSignalingPathway  |
| IGKV5-2   | 28907 immunogl B2 IGKV52  | 2 BCRSignalingPathway  |
| IGKV6-21  | 28906 immunogl A26 IGKV6  | 2 BCRSignalingPathway  |
| IGKV6D-21 | 28870 immunogl A10 IGKV6  | 2 BCRSignalingPathway  |
| IGKV6D-41 | 28869 immunogl A14        | 2 BCRSignalingPathway  |
| IGL       | 3535 immunogl IGL@ IGLC   | 22 BCRSignalingPathway |
| IGLC1     | 3537 immunogl IGLC        | 22 BCRSignalingPathway |
| IGLC2     | 3538 immunogl IGLC        | 22 BCRSignalingPathway |
| IGLC3     | 3539 immunogl IGLC        | 22 BCRSignalingPathway |
| IGLC6     | 3542 immunogl IGLC        | 22 BCRSignalingPathway |
| IGLC7     | 28834 immunogl C7         | 22 BCRSignalingPathway |
| IGLJ      | 8217 - IGLJ@              | 22 BCRSignalingPathway |
| IGLJ1     | 28833 immunogl J1         | 22 BCRSignalingPathway |
| IGLJ2     | 28832 immunogl J2         | 22 BCRSignalingPathway |
| IGLJ3     | 28831 immunogl J3         | 22 BCRSignalingPathway |
| IGLJ4     | 28830 immunogl -          | 22 BCRSignalingPathway |
| IGLJ5     | 28829 immunogl -          | 22 BCRSignalingPathway |
| IGLJ6     | 28828 immunogl -          | 22 BCRSignalingPathway |
| IGLJ7     | 28827 immunogl J7         | 22 BCRSignalingPathway |
| IGLV@     | 3546 - IGLV               | 22 BCRSignalingPathway |
| IGLV1-36  | 28826 immunogl IGLV136 V: | 22 BCRSignalingPathway |
| IGLV1-40  | 28825 immunogl IGLV140 V: | 22 BCRSignalingPathway |
| IGLV1-44  | 28823 immunogl IGLV144 V: | 22 BCRSignalingPathway |
| IGLV1-47  | 28822 immunogl IGLV147 V: | 22 BCRSignalingPathway |
| IGLV1-50  | 28821 immunogl IGLV150 V: | 22 BCRSignalingPathway |
| IGLV1-51  | 28820 immunogl IGLV151 V: | 22 BCRSignalingPathway |
| IGLV10-54 | 28772 immunogl IGLV1054 \ | 22 BCRSignalingPathway |
| IGLV11-55 | 28770 immunogl IGLV1155 \ | 22 BCRSignalingPathway |
| IGLV2-11  | 28816 immunogl IGLV211 V: | 22 BCRSignalingPathway |
| IGLV2-14  | 28815 immunogl IGLV214 V: | 22 BCRSignalingPathway |



|          |                            |                        |
|----------|----------------------------|------------------------|
| IGLV2-18 | 28814 immunogl GLV218 V:   | 22 BCRSignalingPathway |
| IGLV2-23 | 28813 immunogl GLV223 V:   | 22 BCRSignalingPathway |
| IGLV2-33 | 28811 immunogl GLV233 V:   | 22 BCRSignalingPathway |
| IGLV2-8  | 28817 immunogl GLV28 V1:   | 22 BCRSignalingPathway |
| IGLV3-1  | 28809 immunogl GLV31 V2:   | 22 BCRSignalingPathway |
| IGLV3-10 | 28803 immunogl GLV310 V:   | 22 BCRSignalingPathway |
| IGLV3-12 | 28802 immunogl GLV312 V:   | 22 BCRSignalingPathway |
| IGLV3-16 | 28799 immunogl GLV316 V:   | 22 BCRSignalingPathway |
| IGLV3-19 | 28797 immunogl GLV319 V:   | 22 BCRSignalingPathway |
| IGLV3-21 | 28796 immunogl GLV321 V:   | 22 BCRSignalingPathway |
| IGLV3-22 | 28795 immunogl GLV322 V:   | 22 BCRSignalingPathway |
| IGLV3-25 | 28793 immunogl GLV325 V:   | 22 BCRSignalingPathway |
| IGLV3-27 | 28791 immunogl GLV327 V:   | 22 BCRSignalingPathway |
| IGLV3-32 | 28787 immunogl GLV332 V:   | 22 BCRSignalingPathway |
| IGLV3-9  | 28804 immunogl GLV39 V2:   | 22 BCRSignalingPathway |
| IGLV4-3  | 28786 immunogl GLV43 V5:   | 22 BCRSignalingPathway |
| IGLV4-60 | 28785 immunogl GLV460 V:   | 22 BCRSignalingPathway |
| IGLV4-69 | 28784 immunogl GLV469 V:   | 22 BCRSignalingPathway |
| IGLV5-37 | 28783 immunogl GLV537 V:   | 22 BCRSignalingPathway |
| IGLV5-39 | 28782 immunogl GLV539      | 22 BCRSignalingPathway |
| IGLV5-45 | 28781 immunogl GLV545 V:   | 22 BCRSignalingPathway |
| IGLV5-48 | 28780 immunogl GLV548 V:   | 22 BCRSignalingPathway |
| IGLV5-52 | 28779 immunogl GLV552 V:   | 22 BCRSignalingPathway |
| IGLV6-57 | 28778 immunogl GLV657 V:   | 22 BCRSignalingPathway |
| IGLV7-43 | 28776 immunogl GLV743 V:   | 22 BCRSignalingPathway |
| IGLV7-46 | 28775 immunogl GLV746 V:   | 22 BCRSignalingPathway |
| IGLV8-61 | 28774 immunogl GLV861 V:   | 22 BCRSignalingPathway |
| IGLV9-49 | 28773 immunogl GLV949 V:   | 22 BCRSignalingPathway |
| C3       | 718 compleme AHUS5 AR      | 19 Chemokines          |
| C5       | 727 compleme C5D C5a C     | 9 Chemokines           |
| CAMP     | 820 cathelidir CAP-18 CA   | 3 Chemokines           |
| CCL1     | 6346 C-C motif I-309 P500  | 17 Chemokines          |
| CCL11    | 6356 C-C motif SCYA11      | 17 Chemokines          |
| CCL13    | 6357 C-C motif CKb10 MC    | 17 Chemokines          |
| CCL14    | 6358 C-C motif CC-1 CC-3   | 17 Chemokines          |
| CCL15-CC | 348249 CCL15-CC CCL15 HCC  | 17 Chemokines          |
| CCL15    | 6359 C-C motif HCC-2 HM    | 17 Chemokines          |
| CCL16    | 6360 C-C motif CKb12 HCC   | 17 Chemokines          |
| CCL17    | 6361 C-C motif A-152E5.3   | 16 Chemokines          |
| CCL18    | 6362 C-C motif AMAC-1 A    | 17 Chemokines          |
| CCL19    | 6363 C-C motif CKb11 ELC   | 9 Chemokines           |
| CCL2     | 6347 C-C motif GDCF-2 H    | 17 Chemokines          |
| CCL20    | 6364 C-C motif CKb4 Exod   | 2 Chemokines           |
| CCL21    | 6366 C-C motif 6Ckine CKb  | 9 Chemokines           |
| CCL22    | 6367 C-C motif A-152E5.1   | 16 Chemokines          |
| CCL23    | 6368 C-C motif CK-BETA-8   | 17 Chemokines          |
| CCL24    | 6369 C-C motif Ckb-6 MPI   | 7 Chemokines           |
| CCL25    | 6370 C-C motif Ckb15 SCY   | 19 Chemokines          |
| CCL26    | 10344 C-C motif IMAC MIP-  | 7 Chemokines           |
| CCL27    | 10850 C-C motif ALP CTAC   | 9 Chemokines           |
| CCL28    | 56477 C-C motif CCK1 MEC   | 5 Chemokines           |
| CCL3     | 6348 C-C motif GOS19-1 L   | 17 Chemokines          |
| CCL3L1   | 6349 C-C motif 464.2 D17   | 17 Chemokines          |
| CCL3P1   | 390788 C-C motif CCL3L2 G0 | 17 Chemokines          |
| CCL3L3   | 414062 C-C motif 464.2 D17 | 17 Chemokines          |
| CCL4     | 6351 C-C motif ACT2 AT74   | 17 Chemokines          |
| CCL4L2   | 9560 C-C motif AT744.2 C   | 17 Chemokines          |
| CCL4L1   | 388372 C-C motif AT744.2 C | 17 Chemokines          |

|          |                                   |               |
|----------|-----------------------------------|---------------|
| CCL5     | 6352 C-C motif D17S136E           | 17 Chemokines |
| CCL7     | 6354 C-C motif FIC MARC           | 17 Chemokines |
| CCL8     | 6355 C-C motif HC14 MCP           | 17 Chemokines |
| CKLF     | 51192 chemokineC32 CKLF1          | 16 Chemokines |
| CMA1     | 1215 chymase 1 CYH MCT1           | 14 Chemokines |
| CTSG     | 1511 cathepsin (CATG CG           | 14 Chemokines |
| CX3CL1   | 6376 C-X3-C motifABCD-3 C         | 16 Chemokines |
| CXCL1    | 2919 C-X-C motifFSP GRO1          | 4 Chemokines  |
| CXCL10   | 3627 C-X-C motifC7 IFI10 IN       | 4 Chemokines  |
| CXCL11   | 6373 C-X-C motifH174 I-TA         | 4 Chemokines  |
| CXCL12   | 6387 C-X-C motifIRH PBSF S        | 10 Chemokines |
| CXCL13   | 10563 C-X-C motifANGIE AN         | 4 Chemokines  |
| CXCL14   | 9547 C-X-C motifBMAC BRA          | 5 Chemokines  |
| CXCL16   | 58191 C-X-C motifCXCLG16 S        | 17 Chemokines |
| CXCL17   | 284340 C-X-C motifDMC Dcip        | 19 Chemokines |
| CXCL2    | 2920 C-X-C motifCINC-2a G         | 4 Chemokines  |
| CXCL3    | 2921 C-X-C motifCINC-2b G         | 4 Chemokines  |
| CXCL5    | 6374 C-X-C motifENA-78 SC         | 4 Chemokines  |
| CXCL6    | 6372 C-X-C motifCKA-3 GCI         | 4 Chemokines  |
| CXCL9    | 4283 C-X-C motifCMK Humi          | 4 Chemokines  |
| CCN1     | 3491 cellular corCYR61 GIG        | 1 Chemokines  |
| DEFA1    | 1667 defensin a DEF1 DEFA         | 8 Chemokines  |
| DEFA3    | 1668 defensin a DEF3 HNP          | 8 Chemokines  |
| DEFA5    | 1670 defensin a DEF5 HD-5         | 8 Chemokines  |
| DEFB1    | 1672 defensin b BD1 DEFB          | 8 Chemokines  |
| DEFB103B | 55894 defensin b BD-3 DEFB        | 8 Chemokines  |
| DEFB104A | 140596 defensin b BD-4 DEFB       | 8 Chemokines  |
| DEFB4A   | 1673 defensin b BD-2 DEFB         | 8 Chemokines  |
| EDN1     | 1906 endothelinARCND3 E           | 6 Chemokines  |
| EDN2     | 1907 endothelinET-2 ET2 P         | 1 Chemokines  |
| EDN3     | 1908 endothelinET-3 ET3 H         | 20 Chemokines |
| FGF10    | 2255 fibroblast $\zeta$ -         | 5 Chemokines  |
| FGF2     | 2247 fibroblast $\zeta$ BFGF FGF- | 4 Chemokines  |
| HTN3     | 3347 histatin 3 HIS2 HTN2         | 4 Chemokines  |
| CXCL8    | 3576 C-X-C motifGCP-1 GCI         | 4 Chemokines  |
| LECT2    | 3950 leukocyte (chm-II chn        | 5 Chemokines  |
| PF4      | 5196 platelet facCXCL4 PF-        | 4 Chemokines  |
| PF4V1    | 5197 platelet facCXCL4L1 C        | 4 Chemokines  |
| PLAU     | 5328 plasminogATF BDPLT           | 10 Chemokines |
| PPBP     | 5473 pro-plateletB-TG1 Bet        | 4 Chemokines  |
| PPBPP1   | 728045 pro-plateletPPBPL1 TG      | 4 Chemokines  |
| PROK2    | 60675 prokineticinBV8 HH4 K       | 3 Chemokines  |
| RNASE2   | 6036 ribonucleaEDN RAF3           | 14 Chemokines |
| SAA1     | 6288 serum amyPIG4 SAA S          | 11 Chemokines |
| SAA2     | 6289 serum amySAA SAA1            | 11 Chemokines |
| SBDS     | 51119 SBDS ribosCGI-97 SD         | 7 Chemokines  |
| SEMA3A   | 10371 semaphori COLL1 HH          | 7 Chemokines  |
| SEMA3B   | 7869 semaphori LUCA-1 SE          | 3 Chemokines  |
| SEMA3C   | 10512 semaphori SEMAE Ser         | 7 Chemokines  |
| SEMA3D   | 223117 semaphori Sema-Z2 c        | 7 Chemokines  |
| SEMA3E   | 9723 semaphori M-SEMAH            | 7 Chemokines  |
| SEMA3F   | 6405 semaphori SEMA-IV S          | 3 Chemokines  |
| SEMA3G   | 56920 semaphori sem2              | 3 Chemokines  |
| SEMA4A   | 64218 semaphori CORD10 R          | 1 Chemokines  |
| SEMA4B   | 10509 semaphori SEMAC Ser         | 15 Chemokines |
| SEMA4C   | 54910 semaphori M-SEMA-I          | 2 Chemokines  |
| SEMA4D   | 10507 semaphori A8 BB18 C         | 9 Chemokines  |
| SEMA4F   | 10505 ssemaphorM-SEMA P           | 2 Chemokines  |

|         |                               |                        |
|---------|-------------------------------|------------------------|
| SEMA4G  | 57715 semaphori -             | 10 Chemokines          |
| SEMA5A  | 9037 semaphori SEMAF sen      | 5 Chemokines           |
| SEMA5B  | 54437 semaphori SEMAG Sei     | 3 Chemokines           |
| SEMA6A  | 57556 semaphori HT018 SEM     | 5 Chemokines           |
| SEMA6B  | 10501 semaphori EPM11 SEM     | 19 Chemokines          |
| SEMA6C  | 10500 semaphori SEMAY m-      | 1 Chemokines           |
| SEMA6D  | 80031 semaphori -             | 15 Chemokines          |
| SEMA7A  | 8482 semaphori CD108 CD\      | 15 Chemokines          |
| SLIT1   | 6585 slit guidan\MEGF4 SLI    | 10 Chemokines          |
| SLIT2   | 9353 slit guidan\SLIL3 Slit-2 | 4 Chemokines           |
| TNC     | 3371 tenascin C 150-225 D     | 9 Chemokines           |
| TYMP    | 1890 thymidine ECGF ECGF      | 22 Chemokines          |
| XCL1    | 6375 X-C motif \ATAC LPT\     | 1 Chemokines           |
| XCL2    | 6846 X-C motif \SCM-1b S\     | 1 Chemokines           |
| C5AR1   | 728 compleme C5A C5AR         | 19 Chemokine_Receptors |
| ACKR2   | 1238 atypical ch CCBP2 CCF    | 3 Chemokine_Receptors  |
| CCR1    | 1230 C-C motif CD191 CKF      | 3 Chemokine_Receptors  |
| CCR10   | 2826 C-C motif GPR2           | 17 Chemokine_Receptors |
| CCR3    | 1232 C-C motif C C CKR3 C     | 3 Chemokine_Receptors  |
| CCR4    | 1233 C-C motif CC-CKR-4       | 3 Chemokine_Receptors  |
| CCR5    | 1234 C-C motif CC-CKR-5       | 3 Chemokine_Receptors  |
| CCR6    | 1235 C-C motif BN-1 C-C       | 6 Chemokine_Receptors  |
| CCR7    | 1236 C-C motif BLR2 CC-C      | 17 Chemokine_Receptors |
| CCR8    | 1237 C-C motif CC-CKR-8       | 3 Chemokine_Receptors  |
| CCR9    | 10803 C-C motif CC-CKR-9      | 3 Chemokine_Receptors  |
| ACKR4   | 51554 atypical ch CC-CKR-1    | 3 Chemokine_Receptors  |
| CCRL2   | 9034 C-C motif ACKR5 CKF      | 3 Chemokine_Receptors  |
| CMKLR1  | 1240 chemerin cCHEMERIN       | 12 Chemokine_Receptors |
| CX3CR1  | 1524 C-X3-C mo\CCRL1 CM       | 3 Chemokine_Receptors  |
| CXCR3   | 2833 C-X-C mo\CD182 CD:X      | Chemokine_Receptors    |
| CXCR4   | 7852 C-X-C mo\CD184 D2\       | 2 Chemokine_Receptors  |
| CXCR5   | 643 C-X-C mo\BLR1 CD18        | 11 Chemokine_Receptors |
| CXCR6   | 10663 C-X-C mo\BONZO C\       | 3 Chemokine_Receptors  |
| ACKR3   | 57007 atypical ch CMKOR1 C    | 2 Chemokine_Receptors  |
| CYSLTR1 | 10800 cysteinyl leCYSLT1 CYX  | Chemokine_Receptors    |
| CYSLTR2 | 57105 cysteinyl leCYSLT2 CY   | 13 Chemokine_Receptors |
| ACKR1   | 2532 atypical ch CCBP1 CD\    | 1 Chemokine_Receptors  |
| EDNRA   | 1909 endothelin ET-A ETA E    | 4 Chemokine_Receptors  |
| EDNRB   | 1910 endothelin ABCDS ET-     | 13 Chemokine_Receptors |
| FPR1    | 2357 formyl pepFMLP FPR       | 19 Chemokine_Receptors |
| FPR2    | 2358 formyl pepALXR FMLF      | 19 Chemokine_Receptors |
| FPR2    | 2358 formyl pepALXR FMLF      | 19 Chemokine_Receptors |
| GPR17   | 2840 G protein- -             | 2 Chemokine_Receptors  |
| GPR32   | 2854 G protein- RVDR1         | 19 Chemokine_Receptors |
| GPR33   | 2856 G protein- -             | 14 Chemokine_Receptors |
| PTGDR2  | 11251 prostaglan CD294 CR\    | 11 Chemokine_Receptors |
| C5AR2   | 27202 compleme C5L2 GPF7      | 19 Chemokine_Receptors |
| CXCR1   | 3577 C-X-C mo\ C-C C-C-C      | 2 Chemokine_Receptors  |
| CXCR2   | 3579 C-X-C mo\CD182 CD\       | 2 Chemokine_Receptors  |
| LTB4R   | 1241 leukotriene\BLT1 BLTR    | 14 Chemokine_Receptors |
| LTB4R2  | 56413 leukotriene\BLT2 BLTR\  | 14 Chemokine_Receptors |
| PLAUR   | 5329 plasminog\CD87 U-P\      | 19 Chemokine_Receptors |
| PLXNA1  | 5361 plexin A1 NOV NOVI       | 3 Chemokine_Receptors  |
| PLXNA2  | 5362 plexin A2 OCT PLXN\      | 1 Chemokine_Receptors  |
| PLXNA3  | 55558 plexin A3 6.3 HSSEX(X   | Chemokine_Receptors    |
| PLXNA4  | 91584 plexin A4 FAYV282       | 7 Chemokine_Receptors  |
| PLXNB1  | 5364 plexin B1 PLEXIN-B1      | 3 Chemokine_Receptors  |
| PLXNB2  | 23654 plexin B2 MM1 Nb\       | 22 Chemokine_Receptors |

|          |                                      |                        |
|----------|--------------------------------------|------------------------|
| PLXNB3   | 5365 plexin B3 PLEXB3 PLIX           | Chemokine_Receptors    |
| PLXNC1   | 10154 plexin C1 CD232 PLX            | 12 Chemokine_Receptors |
| PLXND1   | 23129 plexin D1 PLEXD1               | 3 Chemokine_Receptors  |
| PTAFR    | 5724 platelet actPAFR                | 1 Chemokine_Receptors  |
| ROBO1    | 6091 roundabout DUTT1 SA             | 3 Chemokine_Receptors  |
| ROBO2    | 6092 roundabout SAX3                 | 3 Chemokine_Receptors  |
| ROBO3    | 64221 roundabout HGPPS HG            | 11 Chemokine_Receptors |
| RXFP3    | 51289 relaxin famGPCR135 F           | 5 Chemokine_Receptors  |
| XCR1     | 2829 X-C motif CCXCR1 GI             | 3 Chemokine_Receptors  |
| ADIPOQ   | 9370 adiponectin ACDC ACR            | 3 Cytokines            |
| ADM      | 133 adrenomedullin AM PAMP           | 11 Cytokines           |
| ADM2     | 79924 adrenomedullin AM2 dJ57C       | 22 Cytokines           |
| AGRP     | 181 agouti related AGRT ART          | 16 Cytokines           |
| AGT      | 183 angiotensin II ANHU SER          | 1 Cytokines            |
| AMBN     | 258 ameloblastin AI1F                | 4 Cytokines            |
| AMELX    | 265 amelogenin AI1E AIH1 X           | Cytokines              |
| AMH      | 268 anti-Müllerian MIF MIS           | 19 Cytokines           |
| ANGPTL5  | 253935 angiopoietin -                | 11 Cytokines           |
| ANGPTL7  | 10218 angiopoietin AngX CDT          | 1 Cytokines            |
| APLN     | 8862 apelin APEL XNP EX              | Cytokines              |
| AREG     | 374 amphiregulin AR AREGB            | 4 Cytokines            |
| MANF     | 7873 mesencephalic ARMET AR          | 3 Cytokines            |
| CDNF     | 441549 cerebral dopamine ARMETL1     | 10 Cytokines           |
| ARTN     | 9048 artemin ART ENOV                | 1 Cytokines            |
| AVP      | 551 arginine vasopressin ADH ARVP    | 20 Cytokines           |
| AZU1     | 566 azurocidin AZAMP AZ              | 19 Cytokines           |
| BDNF     | 627 brain derived ANON2 BL           | 11 Cytokines           |
| BMP1     | 649 bone morphogenetic OL13 PCOL     | 8 Cytokines            |
| BMP10    | 27302 bone morphogenetic -           | 2 Cytokines            |
| BMP15    | 9210 bone morphogenetic GDF9B ODX    | Cytokines              |
| BMP2     | 650 bone morphogenetic BDA2 BMP      | 20 Cytokines           |
| BMP3     | 651 bone morphogenetic BMP-3A        | 4 Cytokines            |
| BMP4     | 652 bone morphogenetic BMP2B BM      | 14 Cytokines           |
| BMP5     | 653 bone morphogenetic -             | 6 Cytokines            |
| BMP6     | 654 bone morphogenetic VGR VGR1      | 6 Cytokines            |
| BMP7     | 655 bone morphogenetic OP-1          | 20 Cytokines           |
| BMP8A    | 353500 bone morphogenetic OP-2       | 1 Cytokines            |
| BMP8B    | 656 bone morphogenetic BMP8 OP2      | 1 Cytokines            |
| BTC      | 685 betacellulin -                   | 4 Cytokines            |
| MYDGF    | 56005 myeloid development C19orf10 E | 19 Cytokines           |
| C3       | 718 complement component AHUS5 AR    | 19 Cytokines           |
| C5       | 727 complement component C5D C5a C   | 9 Cytokines            |
| CALCA    | 796 calcitonin receptor CALC1 CGI    | 11 Cytokines           |
| CALCB    | 797 calcitonin receptor CALC2 CGI    | 11 Cytokines           |
| CAMP     | 820 cathelicidin CAP-18 CA           | 3 Cytokines            |
| CAT      | 847 catalase -                       | 11 Cytokines           |
| CCK      | 885 cholecystitis -                  | 3 Cytokines            |
| CCL1     | 6346 C-C motif I-309 P500            | 17 Cytokines           |
| CCL11    | 6356 C-C motif SCYA11                | 17 Cytokines           |
| CCL13    | 6357 C-C motif CKb10 MC              | 17 Cytokines           |
| CCL14    | 6358 C-C motif CC-1 CC-3             | 17 Cytokines           |
| CCL15-CC | 348249 CCL15-CC CCL15 HCC            | 17 Cytokines           |
| CCL15    | 6359 C-C motif HCC-2 HM              | 17 Cytokines           |
| CCL16    | 6360 C-C motif CKb12 HCC             | 17 Cytokines           |
| CCL17    | 6361 C-C motif A-152E5.3             | 16 Cytokines           |
| CCL18    | 6362 C-C motif AMAC-1 A              | 17 Cytokines           |
| CCL19    | 6363 C-C motif CKb11 ELC             | 9 Cytokines            |
| CCL2     | 6347 C-C motif GDCF-2 HCC            | 17 Cytokines           |

|         |                                   |              |
|---------|-----------------------------------|--------------|
| CCL20   | 6364 C-C motif CKb4 Exod          | 2 Cytokines  |
| CCL21   | 6366 C-C motif 6Ckine CKb         | 9 Cytokines  |
| CCL22   | 6367 C-C motif A-152E5.1          | 16 Cytokines |
| CCL23   | 6368 C-C motif CK-BETA-8          | 17 Cytokines |
| CCL24   | 6369 C-C motif Ckb-6 MPL          | 7 Cytokines  |
| CCL25   | 6370 C-C motif Ckb15 SCY          | 19 Cytokines |
| CCL26   | 10344 C-C motif IMAC MIP-         | 7 Cytokines  |
| CCL27   | 10850 C-C motif ALP CTAC          | 9 Cytokines  |
| CCL28   | 56477 C-C motif CCK1 MEC          | 5 Cytokines  |
| CCL3    | 6348 C-C motif G0S19-1 L          | 17 Cytokines |
| CCL3L1  | 6349 C-C motif 464.2 D17          | 17 Cytokines |
| CCL3P1  | 390788 C-C motif CCL3L2 G0        | 17 Cytokines |
| CCL3L3  | 414062 C-C motif 464.2 D17        | 17 Cytokines |
| CCL4    | 6351 C-C motif ACT2 AT74          | 17 Cytokines |
| CCL4L2  | 9560 C-C motif AT744.2 C          | 17 Cytokines |
| CCL4L1  | 388372 C-C motif AT744.2 C        | 17 Cytokines |
| CCL5    | 6352 C-C motif D17S136E           | 17 Cytokines |
| CCL7    | 6354 C-C motif FIC MARC           | 17 Cytokines |
| CCL8    | 6355 C-C motif HC14 MCP           | 17 Cytokines |
| CD320   | 51293 CD320 mo8D6 8D6A            | 19 Cytokines |
| CD40LG  | 959 CD40 ligandCD154 CD4X         | Cytokines    |
| CD70    | 970 CD70 moleculeCD27-L CE        | 19 Cytokines |
| ADA2    | 51816 adenosine ADGF CEC          | 22 Cytokines |
| CER1    | 9350 cerberus 1.DAND4             | 9 Cytokines  |
| CGA     | 1081 glycoproteinCG-ALPHA         | 6 Cytokines  |
| CGB3    | 1082 chorionic 3CGB CGB5          | 19 Cytokines |
| CGB1    | 114335 chorionic 3-               | 19 Cytokines |
| CGB2    | 114336 chorionic 3-               | 19 Cytokines |
| CGB5    | 93659 chorionic 3CGB HCG          | 19 Cytokines |
| CGB7    | 94027 chorionic 3CG-beta-a        | 19 Cytokines |
| CGB8    | 94115 chorionic 3-                | 19 Cytokines |
| CHGA    | 1113 chromograninCGA              | 14 Cytokines |
| CHGB    | 1114 chromograninSCG1             | 20 Cytokines |
| CKLF    | 51192 chemokineC32 CKLF1          | 16 Cytokines |
| CLCF1   | 23529 cardiotropinBSF-3 BSF       | 11 Cytokines |
| CLEC11A | 6320 C-type lectinCLECSF3 L       | 19 Cytokines |
| CMA1    | 1215 chymase 1 CYH MCT1           | 14 Cytokines |
| CMTM1   | 113540 CKLF like NCKLFH CKL       | 16 Cytokines |
| CMTM2   | 146225 CKLF like NCKLFSF2         | 16 Cytokines |
| CMTM3   | 123920 CKLF like NBNAS2 CKI       | 16 Cytokines |
| CMTM4   | 146223 CKLF like NCKLFSF4         | 16 Cytokines |
| CMTM5   | 116173 CKLF like NCKLFSF5         | 14 Cytokines |
| CMTM6   | 54918 CKLF like NCKLFSF6 PI       | 3 Cytokines  |
| CMTM7   | 112616 CKLF like NCKLFSF7         | 3 Cytokines  |
| CMTM8   | 152189 CKLF like NCKLFSF8 C       | 3 Cytokines  |
| CNTF    | 1270 ciliary neurotrophic         | 11 Cytokines |
| CORT    | 1325 cortistatin CST-14 CS        | 1 Cytokines  |
| CRH     | 1392 corticotropinCRF CRH1        | 8 Cytokines  |
| CSF1    | 1435 colony stimulatingCSF-1 MC   | 1 Cytokines  |
| CSF2    | 1437 colony stimulatingCSF GMCS   | 5 Cytokines  |
| CSF3    | 1440 colony stimulatingC17orf33 C | 17 Cytokines |
| CSH1    | 1442 chorionic sCS-1 CSA          | 17 Cytokines |
| CSH2    | 1443 chorionic sCS-2 CSB          | 17 Cytokines |
| CSHL1   | 1444 chorionic sCS-5 CSHF         | 17 Cytokines |
| CSPG5   | 10675 chondroitinNGC              | 3 Cytokines  |
| CTF1    | 1489 cardiotropinCT-1 CT1         | 16 Cytokines |
| CCN2    | 1490 cellular connectiveCTGF HCS  | 6 Cytokines  |
| CTSG    | 1511 cathepsin (CATG) CG          | 14 Cytokines |

|          |                                                |              |
|----------|------------------------------------------------|--------------|
| CX3CL1   | 6376 C-X-C motif ABCD-3 C                      | 16 Cytokines |
| CXCL1    | 2919 C-X-C motif FSP GRO1                      | 4 Cytokines  |
| CXCL10   | 3627 C-X-C motif C7 IFI10 IN                   | 4 Cytokines  |
| CXCL11   | 6373 C-X-C motif H174 I-TA                     | 4 Cytokines  |
| CXCL12   | 6387 C-X-C motif IRH PBSF S                    | 10 Cytokines |
| CXCL13   | 10563 C-X-C motif ANGLE AN                     | 4 Cytokines  |
| CXCL14   | 9547 C-X-C motif BMAC BRA                      | 5 Cytokines  |
| CXCL16   | 58191 C-X-C motif CXCLG16 S                    | 17 Cytokines |
| CXCL17   | 284340 C-X-C motif DMC Dcip                    | 19 Cytokines |
| CXCL2    | 2920 C-X-C motif CINC-2a G                     | 4 Cytokines  |
| CXCL3    | 2921 C-X-C motif CINC-2b G                     | 4 Cytokines  |
| CXCL5    | 6374 C-X-C motif ENA-78 SC                     | 4 Cytokines  |
| CXCL6    | 6372 C-X-C motif CKA-3 GC                      | 4 Cytokines  |
| CXCL9    | 4283 C-X-C motif CMK Humi                      | 4 Cytokines  |
| CCN1     | 3491 cellular coreceptor CYR61 GIG             | 1 Cytokines  |
| DEFA1    | 1667 defensin alpha DEF1 DEFA                  | 8 Cytokines  |
| DEFA3    | 1668 defensin alpha DEF3 HNP                   | 8 Cytokines  |
| DEFA5    | 1670 defensin alpha DEF5 HD-5                  | 8 Cytokines  |
| DEFB1    | 1672 defensin beta BD1 DEFB                    | 8 Cytokines  |
| DEFB103B | 55894 defensin beta BD-3 DEFB                  | 8 Cytokines  |
| DEFB104A | 140596 defensin beta BD-4 DEFB                 | 8 Cytokines  |
| DEFB4A   | 1673 defensin beta BD-2 DEFB                   | 8 Cytokines  |
| DDIT3    | 22943 dickkopf 3 WNT1 SK                       | 10 Cytokines |
| EBI3     | 10148 Epstein-Barr virus BILF1 IL27            | 19 Cytokines |
| EDN1     | 1906 endothelin A ARCND3 E                     | 6 Cytokines  |
| EDN2     | 1907 endothelin ET-2 ET2 P                     | 1 Cytokines  |
| EDN3     | 1908 endothelin ET-3 ET3 H                     | 20 Cytokines |
| EGF      | 1950 epidermal growth factor HOMG4 UI          | 4 Cytokines  |
| EPGN     | 255324 epithelial natriuretic peptide ALGV3072 | 4 Cytokines  |
| EPO      | 2056 erythropoietin DBAL ECYT                  | 7 Cytokines  |
| EREG     | 2069 epiregulin EPR ER Ep                      | 4 Cytokines  |
| ESM1     | 11082 endothelial endocan                      | 5 Cytokines  |
| FAM3B    | 54097 FAM3 member 2-21 C21o                    | 21 Cytokines |
| FAM3C    | 10447 FAM3 member GS3786 ILE                   | 7 Cytokines  |
| FAM3D    | 131177 FAM3 member EF7 OIT1                    | 3 Cytokines  |
| FASLG    | 356 Fas ligand ALPS1B AP                       | 1 Cytokines  |
| FGF1     | 2246 fibroblast growth factor AFGF ECGF        | 5 Cytokines  |
| FGF10    | 2255 fibroblast growth factor -                | 5 Cytokines  |
| FGF11    | 2256 fibroblast growth factor -11 FH           | 17 Cytokines |
| FGF12    | 2257 fibroblast growth factor EIEE47 FGF       | 3 Cytokines  |
| FGF13    | 2258 fibroblast growth factor -13 FGX          | Cytokines    |
| FGF14    | 2259 fibroblast growth factor -14 FH           | 13 Cytokines |
| FGF16    | 8823 fibroblast growth factor -16 MFX          | Cytokines    |
| FGF17    | 8822 fibroblast growth factor -13 FG           | 8 Cytokines  |
| FGF18    | 8817 fibroblast growth factor -18 ZF           | 5 Cytokines  |
| FGF19    | 9965 fibroblast growth factor -                | 11 Cytokines |
| FGF2     | 2247 fibroblast growth factor BFGF FGF-        | 4 Cytokines  |
| FGF20    | 26281 fibroblast growth factor -20 RH          | 8 Cytokines  |
| FGF21    | 26291 fibroblast growth factor -               | 19 Cytokines |
| FGF22    | 27006 fibroblast growth factor -               | 19 Cytokines |
| FGF23    | 8074 fibroblast growth factor ADHR FGF         | 12 Cytokines |
| FGF3     | 2248 fibroblast growth factor HBGF-3 IN        | 11 Cytokines |
| FGF4     | 2249 fibroblast growth factor -4 HBC           | 11 Cytokines |
| FGF5     | 2250 fibroblast growth factor HBGF-5 Sn        | 4 Cytokines  |
| FGF6     | 2251 fibroblast growth factor HBGF-6 H         | 12 Cytokines |
| FGF7     | 2252 fibroblast growth factor HBGF-7 KC        | 15 Cytokines |
| FGF8     | 2253 fibroblast growth factor AIGF FGF-8       | 10 Cytokines |
| FGF9     | 2254 fibroblast growth factor -9 GAF           | 13 Cytokines |

|        |                              |              |
|--------|------------------------------|--------------|
| VEGFD  | 2277 vascular erFIGF VEGF-X  | Cytokines    |
| FIGNL2 | 401720 fidgetin like-        | 12 Cytokines |
| FLT3LG | 2323 fms relatedFL FLG3L F   | 19 Cytokines |
| FSHB   | 2488 follicle stimHH24       | 11 Cytokines |
| GAL    | 51083 galanin aneETL8 GAL-   | 11 Cytokines |
| GALP   | 85569 galanin like-          | 19 Cytokines |
| GAST   | 2520 gastrin GAS             | 17 Cytokines |
| GCG    | 2641 glucagon GLP-1 GLP      | 2 Cytokines  |
| GDF1   | 2657 growth difCERS1 CH1     | 19 Cytokines |
| GDF10  | 2662 growth difBIP BMP-3     | 10 Cytokines |
| GDF11  | 10220 growth difBMP-11 BM    | 12 Cytokines |
| GDF15  | 9518 growth difGDF-15 M      | 19 Cytokines |
| GDF2   | 2658 growth difBMP-9 BM      | 10 Cytokines |
| GDF3   | 9573 growth difKFS3 MCO      | 12 Cytokines |
| GDF5   | 8200 growth difBDA1C BM      | 20 Cytokines |
| GDF6   | 392255 growth difBMP-13 BM   | 8 Cytokines  |
| GDF7   | 151449 growth difBMP12       | 2 Cytokines  |
| GDF9   | 2661 growth difPOF14         | 5 Cytokines  |
| GNDF   | 2668 glial cell deATF ATF1 / | 5 Cytokines  |
| GH1    | 2688 growth hoGH GH-N        | 17 Cytokines |
| GH2    | 2689 growth hoGH-V GHB       | 17 Cytokines |
| GHRH   | 2691 growth hoGHRF GRF       | 20 Cytokines |
| GHRL   | 51738 ghrelin ancMTLRP       | 3 Cytokines  |
| GIP    | 2695 gastric inhi-           | 17 Cytokines |
| GKN1   | 56287 gastroke AMP18 BR      | 2 Cytokines  |
| GMFB   | 2764 glia maturgGMF          | 14 Cytokines |
| GMFG   | 9535 glia maturgGMF-GAM      | 19 Cytokines |
| GNRH1  | 2796 gonadotro GNRH GRF      | 8 Cytokines  |
| GNRH2  | 2797 gonadotro GnRH-II LF    | 20 Cytokines |
| GPHA2  | 170589 glycoproteA2 GPA2 Z   | 11 Cytokines |
| GPHB5  | 122876 glycoproteB5 GPB5 ZI  | 14 Cytokines |
| GPI    | 2821 glucose-6-AMF GNPI      | 19 Cytokines |
| GREM1  | 26585 gremlin 1, C15DUPq C   | 15 Cytokines |
| GREM2  | 64388 gremlin 2, CKTSF1B2    | 1 Cytokines  |
| GRN    | 2896 granulin prCLN11 GEF    | 17 Cytokines |
| GRP    | 2922 gastrin releBN GRP-1C   | 18 Cytokines |
| GUCA2A | 2980 guanylate GCAP-I GL     | 1 Cytokines  |
| HAMP   | 57817 hepcidin aiHEPC HFE2   | 19 Cytokines |
| HBEGF  | 1839 heparin birDTR DTS D    | 5 Cytokines  |
| HDGF   | 3068 heparin birHMG1L2       | 1 Cytokines  |
| HDGFL3 | 50810 HDGF like CGI-142 H    | 15 Cytokines |
| HGF    | 3082 hepatocyteDFNB39 F-     | 7 Cytokines  |
| HTN3   | 3347 histatin 3 HIS2 HTN2    | 4 Cytokines  |
| IAPP   | 3375 islet amylo DAP IAP     | 12 Cytokines |
| IFNA1  | 3439 interferon IFL IFN IFN  | 9 Cytokines  |
| IFNA10 | 3446 interferon IFN-alphaC   | 9 Cytokines  |
| IFNA13 | 3447 interferon I-           | 9 Cytokines  |
| IFNA14 | 3448 interferon IFN-alphaI   | 9 Cytokines  |
| IFNA16 | 3449 interferon IFN-alpha-   | 9 Cytokines  |
| IFNA17 | 3451 interferon IFN-alphaI   | 9 Cytokines  |
| IFNA2  | 3440 interferon IFN-alpha-   | 9 Cytokines  |
| IFNA21 | 3452 interferon IFN-alphaI   | 9 Cytokines  |
| IFNA4  | 3441 interferon IFN-alpha4   | 9 Cytokines  |
| IFNA5  | 3442 interferon IFN-alpha-   | 9 Cytokines  |
| IFNA6  | 3443 interferon IFN-alphaI   | 9 Cytokines  |
| IFNA7  | 3444 interferon IFN-alphaJ   | 9 Cytokines  |
| IFNA8  | 3445 interferon IFN-alphaI   | 9 Cytokines  |
| IFNB1  | 3456 interferon IFB IFF IFN- | 9 Cytokines  |

|        |                                 |              |
|--------|---------------------------------|--------------|
| IFNE   | 338376 interferon IFN-E IFNE    | 9 Cytokines  |
| IFNG   | 3458 interferon IFG IFI         | 12 Cytokines |
| IFNK   | 56832 interferon IFNT1 INFE     | 9 Cytokines  |
| IFNW1  | 3467 interferon -               | 9 Cytokines  |
| IGF1   | 3479 insulin like IGF IGF-II IC | 12 Cytokines |
| IGF2   | 3481 insulin like C11orf43 C    | 11 Cytokines |
| IL10   | 3586 interleukin CSIF GVHC      | 1 Cytokines  |
| IL11   | 3589 interleukin AGIF IL-11     | 19 Cytokines |
| IL12A  | 3592 interleukin CLMF IL-12     | 3 Cytokines  |
| IL12B  | 3593 interleukin CLMF CLM       | 5 Cytokines  |
| IL13   | 3596 interleukin IL-13 P600     | 5 Cytokines  |
| IL15   | 3600 interleukin IL-15          | 4 Cytokines  |
| IL16   | 3603 interleukin LCF NIL16      | 15 Cytokines |
| IL17A  | 3605 interleukin CTLA-8 CT      | 6 Cytokines  |
| IL17B  | 27190 interleukin IL-17B IL-2   | 5 Cytokines  |
| IL17C  | 27189 interleukin CX2 IL-17C    | 16 Cytokines |
| IL17D  | 53342 interleukin IL-17D        | 13 Cytokines |
| IL17F  | 112744 interleukin CANDF6 IL    | 6 Cytokines  |
| IL18   | 3606 interleukin IGIF IL-18 I   | 11 Cytokines |
| IL19   | 29949 interleukin IL-10C MD     | 1 Cytokines  |
| IL1A   | 3552 interleukin IL-1 alpha     | 2 Cytokines  |
| IL1B   | 3553 interleukin IL-1 IL1-BE    | 2 Cytokines  |
| IL1F10 | 84639 interleukin FIL1-theta    | 2 Cytokines  |
| IL36RN | 26525 interleukin FIL1 FIL1(D   | 2 Cytokines  |
| IL36A  | 27179 interleukin FIL1 FIL1(EI  | 2 Cytokines  |
| IL37   | 27178 interleukin FIL1 FIL1(Z   | 2 Cytokines  |
| IL36B  | 27177 interleukin FIL1 FIL1-(I  | 2 Cytokines  |
| IL36G  | 56300 interleukin IL-1F9 IL-1   | 2 Cytokines  |
| IL1RN  | 3557 interleukin DIRA ICIL-     | 2 Cytokines  |
| IL2    | 3558 interleukin IL-2 TCGF      | 4 Cytokines  |
| IL20   | 50604 interleukin IL-20 IL10I   | 1 Cytokines  |
| IL21   | 59067 interleukin CVID11 IL-    | 4 Cytokines  |
| IL22   | 50616 interleukin IL-21 IL-22   | 12 Cytokines |
| IL23A  | 51561 interleukin IL-23 IL-23   | 12 Cytokines |
| IL24   | 11009 interleukin C49A FISP     | 1 Cytokines  |
| IL25   | 64806 interleukin IL17E         | 14 Cytokines |
| IL26   | 55801 interleukin AK155 IL-2    | 12 Cytokines |
| IL27   | 246778 interleukin IL-27 IL-27  | 16 Cytokines |
| IFNL2  | 282616 interferon IL-28A IL28   | 19 Cytokines |
| IFNL3  | 282617 interferon IFN-lambda    | 19 Cytokines |
| IFNL1  | 282618 interferon IL-29 IL29    | 19 Cytokines |
| IL3    | 3562 interleukin IL-3 MCGF      | 5 Cytokines  |
| IL31   | 386653 interleukin IL-31        | 12 Cytokines |
| IL32   | 9235 interleukin IL-32alpha     | 16 Cytokines |
| IL33   | 90865 interleukin C9orf26 D\    | 9 Cytokines  |
| IL34   | 146433 interleukin C16orf77 IL  | 16 Cytokines |
| IL4    | 3565 interleukin BCGF-1 BC      | 5 Cytokines  |
| IL5    | 3567 interleukin EDF IL-5 TI    | 5 Cytokines  |
| IL6    | 3569 interleukin BSF-2 BSF2     | 7 Cytokines  |
| IL6ST  | 3572 interleukin CD130 CD\      | 5 Cytokines  |
| IL7    | 3574 interleukin IL-7           | 8 Cytokines  |
| CXCL8  | 3576 C-X-C motif GCP-1 GCI      | 4 Cytokines  |
| IL9    | 3578 interleukin HP40 IL-9      | 5 Cytokines  |
| INH A  | 3623 inhibin sub -              | 2 Cytokines  |
| INHBA  | 3624 inhibin sub EDF FRP        | 7 Cytokines  |
| INHBB  | 3625 inhibin sub -              | 2 Cytokines  |
| INHBC  | 3626 inhibin sub IHBC           | 12 Cytokines |
| INHBE  | 83729 inhibin sub -             | 12 Cytokines |



|          |                    |             |              |
|----------|--------------------|-------------|--------------|
| INS      | 3630 insulin       | IDDM IDDM   | 11 Cytokines |
| INS-IGF2 | 723961 INS-IGF2 r  | INSIGF      | 11 Cytokines |
| INSL3    | 3640 insulin like  | RLF RLNL    | 19 Cytokines |
| INSL4    | 3641 insulin like  | EPIL PLACE  | 9 Cytokines  |
| INSL5    | 10022 insulin like | PRO182 UI   | 1 Cytokines  |
| INSL6    | 11172 insulin like | RIF1        | 9 Cytokines  |
| JAG1     | 182 jagged car     | AGS AGS1    | 20 Cytokines |
| JAG2     | 3714 jagged car    | HJ2 SER2    | 14 Cytokines |
| FGF7P6   | 387628 fibroblast  | KGFLP1      | 9 Cytokines  |
| FGF7P3   | 654466 fibroblast  | KGFLP2      | 9 Cytokines  |
| KITLG    | 4254 KIT ligand    | DCUA DFN    | 12 Cytokines |
| KL       | 9365 klotho        | HFTC3       | 13 Cytokines |
| LACRT    | 90070 lacritin     | -           | 12 Cytokines |
| LECT2    | 3950 leukocyte     | chm-II chn  | 5 Cytokines  |
| LEFTY1   | 10637 left-right   | dLEFTB LEFT | 1 Cytokines  |
| LEFTY2   | 7044 left-right    | dEBAF LEFT  | 1 Cytokines  |
| LEP      | 3952 leptin        | LEPD OB C   | 7 Cytokines  |
| LHB      | 3972 luteinizing   | CGB4 HH2    | 19 Cytokines |
| LIF      | 3976 LIF interleu  | CDF DIA H   | 22 Cytokines |
| LRSAM1   | 90678 leucine ric  | CMT2P RIF   | 9 Cytokines  |
| LTA      | 4049 lymphotox     | LT TNFB TN  | 6 Cytokines  |
| LTB      | 4050 lymphotox     | TNFC TNF    | 6 Cytokines  |
| LTBP1    | 4052 latent trans  | -           | 2 Cytokines  |
| LTBP2    | 4053 latent trans  | C14orf141   | 14 Cytokines |
| LTBP3    | 4054 latent trans  | DASS GPH    | 11 Cytokines |
| LTBP4    | 8425 latent trans  | ARCL1C LT   | 19 Cytokines |
| MDK      | 4192 midkine       | ARAP MK     | 11 Cytokines |
| MIA      | 8190 MIA SH3 d     | CD-RAP      | 19 Cytokines |
| MIF      | 4282 macrophag     | GIF GLIF M  | 22 Cytokines |
| MLN      | 4295 motilin       | -           | 6 Cytokines  |
| MSTN     | 2660 myostatin     | GDF8 MSL    | 2 Cytokines  |
| NAMPT    | 10135 nicotinami   | 1110035O    | 7 Cytokines  |
| NDP      | 4693 norrin cyst   | EVR2 FEVRX  | Cytokines    |
| NENF     | 29937 neudesin     | nCIR2 SCIRP | 1 Cytokines  |
| NGF      | 4803 nerve grow    | Beta-NGF    | 1 Cytokines  |
| NMB      | 4828 neuromedi     | -           | 15 Cytokines |
| NODAL    | 4838 nodal grow    | HTX5        | 10 Cytokines |
| CCN3     | 4856 cellular cor  | IBP-9 IGFB  | 8 Cytokines  |
| NPFF     | 8620 neuropept     | FMRFAL      | 12 Cytokines |
| NPPA     | 4878 natriuretic   | ANF ANP     | 1 Cytokines  |
| NPPB     | 4879 natriuretic   | BNP         | 1 Cytokines  |
| NPPC     | 4880 natriuretic   | CNP CNP2    | 2 Cytokines  |
| NPY      | 4852 neuropept     | PYY4        | 7 Cytokines  |
| NRG1     | 3084 neuregulin    | ARIA GGF    | 8 Cytokines  |
| NRG2     | 9542 neuregulin    | DON1 HRC    | 5 Cytokines  |
| NRG3     | 10718 neuregulin   | HRG3 pro-   | 10 Cytokines |
| NRG4     | 145957 neuregulin  | HRG4        | 15 Cytokines |
| NRTN     | 4902 neurturin     | NTN         | 19 Cytokines |
| NTF3     | 4908 neurotropl    | HDNF NGF    | 12 Cytokines |
| NTF4     | 4909 neurotropl    | GLC10 GLC   | 19 Cytokines |
| NTS      | 4922 neurotensi    | NMN-125     | 12 Cytokines |
| NUDT6    | 11162 nudix hydr   | ASFGF2 FC   | 4 Cytokines  |
| OGN      | 4969 osteoglycir   | OG OIF SLI  | 9 Cytokines  |
| OSGIN1   | 29948 oxidative s  | BDGI OKL3   | 16 Cytokines |
| OSM      | 5008 oncostatin    | -           | 22 Cytokines |
| OSTN     | 344901 osteocrin   | MUSCLIN     | 3 Cytokines  |
| OXT      | 5020 oxytocin/n    | OT OT-NP    | 20 Cytokines |
| ENDOU    | 8909 endonucle     | P11 PP11 F  | 12 Cytokines |

|         |                               |              |
|---------|-------------------------------|--------------|
| PDGFA   | 5154 platelet de PDGF-A PI    | 7 Cytokines  |
| PDGFB   | 5155 platelet de IBGC5 PDC    | 22 Cytokines |
| PDGFC   | 56034 platelet de FALLOTEIN   | 4 Cytokines  |
| PDGFD   | 80310 platelet de IEGF MSTP   | 11 Cytokines |
| PDGFRA  | 5156 platelet de CD140A PI    | 4 Cytokines  |
| PDGFRB  | 5159 platelet de CD140B IB    | 5 Cytokines  |
| PDGFRL  | 5157 platelet de PDGRL PRL    | 8 Cytokines  |
| PDYN    | 5173 prodynorp ADCA PEN       | 20 Cytokines |
| PENK    | 5179 proenkephPE PENK-A       | 8 Cytokines  |
| PF4     | 5196 platelet facCXCL4 PF-    | 4 Cytokines  |
| PF4V1   | 5197 platelet facCXCL4L1 C    | 4 Cytokines  |
| PGF     | 5228 placental gD12S1900      | 14 Cytokines |
| PLAU    | 5328 plasminogATF BDPLT       | 10 Cytokines |
| PMCH    | 5367 pro-melanMCH ppM         | 12 Cytokines |
| PNOC    | 5368 prepronocIN/OFQ INC      | 8 Cytokines  |
| POMC    | 5443 proopiomeACTH CLIP       | 2 Cytokines  |
| PPBP    | 5473 pro-plateleB-TG1 Bet     | 4 Cytokines  |
| PPBPP1  | 728045 pro-platelePPBPL1 TG   | 4 Cytokines  |
| PPBPP2  | 10895 pro-platelePPBPL2 SP    | 4 Cytokines  |
| PPY     | 5539 pancreatic PNP PP        | 17 Cytokines |
| PRL     | 5617 prolactin GHA1           | 6 Cytokines  |
| PRLH    | 51052 prolactin rPRH PRRP     | 2 Cytokines  |
| PROK1   | 84432 prokineticieGVVEGF P    | 1 Cytokines  |
| PROK2   | 60675 prokineticieBV8 HH4 K   | 3 Cytokines  |
| PSPN    | 5623 persephin PSP            | 19 Cytokines |
| PTH     | 5741 parathyroicFIH1 PTH1     | 11 Cytokines |
| PTH2    | 113091 parathyroicTIP39       | 19 Cytokines |
| PTHLH   | 5744 parathyroicBDE2 HHM      | 12 Cytokines |
| PTN     | 5764 pleiotrophieHARP HB-     | 7 Cytokines  |
| PYY     | 5697 peptide YYPYY-I PYY1     | 17 Cytokines |
| QRFP    | 347148 pyroglutan26RFa P51    | 9 Cytokines  |
| RABEP1  | 9135 rabaptin, RRAB5EP RA     | 17 Cytokines |
| RABEP2  | 79874 rabaptin, RFRA          | 16 Cytokines |
| REG1A   | 5967 regeneratirICRF P19 P    | 2 Cytokines  |
| RETN    | 56729 resistin ADSF FIZZ      | 19 Cytokines |
| RETNLB  | 84666 resistin likeFIZZ1 FIZZ | 3 Cytokines  |
| RLN1    | 6013 relaxin 1 H1 H1RLX       | 9 Cytokines  |
| RLN2    | 6019 relaxin 2 H2 H2-RLX      | 9 Cytokines  |
| RLN3    | 117579 relaxin 3 H3 RXN3 Z    | 19 Cytokines |
| RNASE2  | 6036 ribonucleaEDN RAF3       | 14 Cytokines |
| S100A6  | 6277 S100 calci2A9 5B10 C     | 1 Cytokines  |
| SAA1    | 6288 serum amyPIG4 SAA S      | 11 Cytokines |
| SAA2    | 6289 serum amySAA SAA1        | 11 Cytokines |
| SBDS    | 51119 SBDS ribosCGI-97 SD     | 7 Cytokines  |
| SCG2    | 7857 secretograCHGC EM        | 2 Cytokines  |
| SCGB3A1 | 92304 secretogloHIN-1 HIN     | 5 Cytokines  |
| SCT     | 6343 secretin -               | 11 Cytokines |
| AIMP1   | 9255 aminoacyl EMAP2 EM       | 4 Cytokines  |
| SECTM1  | 6398 secreted aK12 SECTM      | 17 Cytokines |
| SEMA3A  | 10371 semaphori COLL1 HH      | 7 Cytokines  |
| SEMA3B  | 7869 semaphori LUCA-1 SE      | 3 Cytokines  |
| SEMA3C  | 10512 semaphori SEMAE Ser     | 7 Cytokines  |
| SEMA3D  | 223117 semaphori Sema-Z2 c    | 7 Cytokines  |
| SEMA3E  | 9723 semaphori M-SEMAH        | 7 Cytokines  |
| SEMA3F  | 6405 semaphori SEMA-IV S      | 3 Cytokines  |
| SEMA3G  | 56920 semaphori sem2          | 3 Cytokines  |
| SEMA4A  | 64218 semaphori CORD10 R      | 1 Cytokines  |
| SEMA4B  | 10509 semaphori SEMAC Sei     | 15 Cytokines |

|           |                                      |              |
|-----------|--------------------------------------|--------------|
| SEMA4C    | 54910 semaphori M-SEMA-I             | 2 Cytokines  |
| SEMA4D    | 10507 semaphori A8 BB18 C9           | 9 Cytokines  |
| SEMA4F    | 10505 ssemaphori M-SEMA P            | 2 Cytokines  |
| SEMA4G    | 57715 semaphori -                    | 10 Cytokines |
| SEMA5A    | 9037 semaphori SEMAF sen             | 5 Cytokines  |
| SEMA5B    | 54437 semaphori SEMAG Sei            | 3 Cytokines  |
| SEMA6A    | 57556 semaphori HT018 SEM            | 5 Cytokines  |
| SEMA6B    | 10501 semaphori EPM11 SEM            | 19 Cytokines |
| SEMA6C    | 10500 semaphori SEMAY m-             | 1 Cytokines  |
| SEMA6D    | 80031 semaphori -                    | 15 Cytokines |
| SEMA7A    | 8482 semaphori CD108 CD\             | 15 Cytokines |
| SLIT1     | 6585 slit guidance MEGF4 SLI         | 10 Cytokines |
| SLIT2     | 9353 slit guidance SLIL3 Slit-2      | 4 Cytokines  |
| SLURP1    | 57152 secreted L'ANUP ARS            | 8 Cytokines  |
| SPP1      | 6696 secreted p BNSP BSP             | 4 Cytokines  |
| SST       | 6750 somatostatin SMST               | 3 Cytokines  |
| STC1      | 6781 stanniocalcin STC               | 8 Cytokines  |
| STC2      | 8614 stanniocalcin STC-2 STC         | 5 Cytokines  |
| TAC1      | 6863 tachykinin Hs.2563 NF           | 7 Cytokines  |
| TDGF1     | 6997 teratocarci CR CR-1 C           | 3 Cytokines  |
| TDGF1P3   | 6998 teratocarci CR-3 CRIP`X         | Cytokines    |
| TG        | 7038 thyroglobulin AITD3 TGN         | 8 Cytokines  |
| TGFA      | 7039 transformin TFGA                | 2 Cytokines  |
| TGFB1     | 7040 transformin CED DPD1            | 19 Cytokines |
| TGFB2     | 7042 transformin G-TSF LDS           | 1 Cytokines  |
| TGFB3     | 7043 transformin ARVD ARV            | 14 Cytokines |
| THPO      | 7066 thrombopoietin MGDF MK          | 3 Cytokines  |
| TNC       | 3371 tenascin C 150-225 D            | 9 Cytokines  |
| TNF       | 7124 tumor necrosis DIF TNF-al       | 6 Cytokines  |
| TNFRSF11F | 4982 TNF receptor OCIF OPG           | 8 Cytokines  |
| TNFSF10   | 8743 TNF superfamily APO2L Apo       | 3 Cytokines  |
| TNFSF11   | 8600 TNF superfamily CD254 OD        | 13 Cytokines |
| TNFSF12   | 8742 TNF superfamily APO3L DR        | 17 Cytokines |
| TNFSF13   | 8741 TNF superfamily APRIL CD2       | 17 Cytokines |
| TNFSF13B  | 10673 TNF superfamily BAFF BLYS      | 13 Cytokines |
| TNFSF14   | 8740 TNF superfamily CD258 HVI       | 19 Cytokines |
| TNFSF15   | 9966 TNF superfamily TL1 TL1A T      | 9 Cytokines  |
| TNFSF18   | 8995 TNF superfamily AITRL GITR      | 1 Cytokines  |
| TNFSF4    | 7292 TNF superfamily CD134L CE       | 1 Cytokines  |
| TNFSF8    | 944 TNF superfamily CD153 CD         | 9 Cytokines  |
| TNFSF9    | 8744 TNF superfamily 14-1BB-L C      | 19 Cytokines |
| TOR2A     | 27433 torsin family TORP1            | 9 Cytokines  |
| TRH       | 7200 thyrotropin Pro-TRH T           | 3 Cytokines  |
| TSHB      | 7252 thyroid stimulating TSH-B TSH   | 1 Cytokines  |
| TSLP      | 85480 thymic stromal -               | 5 Cytokines  |
| TXLNA     | 200081 taxilin alpha IL14 TXLN       | 1 Cytokines  |
| TYMP      | 1890 thymidine ECGF ECGF             | 22 Cytokines |
| UCN       | 7349 urocortin UI UROC               | 2 Cytokines  |
| UCN2      | 90226 urocortin 2 SRP UCN-I          | 3 Cytokines  |
| UCN3      | 114131 urocortin 3 SCP SPC U         | 10 Cytokines |
| UTS2      | 10911 urotensin 2 PRO1068 L          | 1 Cytokines  |
| UTS2B     | 257313 urotensin 2 U2B URP U         | 3 Cytokines  |
| VEGFA     | 7422 vascular endothelial MVCD1 VE   | 6 Cytokines  |
| VEGFB     | 7423 vascular endothelial VEGFL VRF  | 11 Cytokines |
| VEGFC     | 7424 vascular endothelial Flt4-L LMP | 4 Cytokines  |
| VGf       | 7425 VGF nerve SCG7 SgVI             | 7 Cytokines  |
| VIP       | 7432 vasoactive PHM27                | 6 Cytokines  |
| XCL1      | 6375 X-C motif 1 ATAC LPTN           | 1 Cytokines  |

|          |                     |                       |
|----------|---------------------|-----------------------|
| XCL2     | 6846 X-C motif      | 1 Cytokines           |
| ACVR1B   | 91 activin A re     | 12 Cytokine_Receptors |
| ACVR1C   | 130399 activin A re | 2 Cytokine_Receptors  |
| ACVR2A   | 92 activin A re     | 2 Cytokine_Receptors  |
| ACVR2B   | 93 activin A re     | 3 Cytokine_Receptors  |
| ACVRL1   | 94 activin A re     | 12 Cytokine_Receptors |
| ADCYAP1F | 117 ADCYAP re       | 7 Cytokine_Receptors  |
| ADIPOR1  | 51094 adiponecti    | 1 Cytokine_Receptors  |
| ADIPOR2  | 79602 adiponecti    | 12 Cytokine_Receptors |
| ADRB1    | 153 adrenocep       | 10 Cytokine_Receptors |
| ADRB2    | 154 adrenocep       | 5 Cytokine_Receptors  |
| AGTR1    | 185 angiotensii     | 3 Cytokine_Receptors  |
| AGTR2    | 186 angiotensii     | Cytokine_Receptors    |
| AMHR2    | 269 anti-Mullei     | 12 Cytokine_Receptors |
| ANGPT1   | 284 angiopoiet      | 8 Cytokine_Receptors  |
| ANGPT4   | 51378 angiopoiet    | 20 Cytokine_Receptors |
| ANGPTL1  | 9068 angiopoiet     | 1 Cytokine_Receptors  |
| ANGPTL2  | 23452 angiopoiet    | 9 Cytokine_Receptors  |
| ANGPTL3  | 27329 angiopoiet    | 1 Cytokine_Receptors  |
| ANGPTL4  | 51129 angiopoiet    | 19 Cytokine_Receptors |
| ANGPTL6  | 83854 angiopoiet    | 19 Cytokine_Receptors |
| APLNR    | 187 apelin rece     | 11 Cytokine_Receptors |
| AR       | 367 androgen        | Cytokine_Receptors    |
| AVPR1A   | 552 arginine va     | 12 Cytokine_Receptors |
| AVPR1B   | 553 arginine va     | 1 Cytokine_Receptors  |
| AVPR2    | 554 arginine va     | Cytokine_Receptors    |
| BMPR1A   | 657 bone morç       | 10 Cytokine_Receptors |
| BMPR1B   | 658 bone morç       | 4 Cytokine_Receptors  |
| BMPR2    | 659 bone morç       | 2 Cytokine_Receptors  |
| BRD8     | 10902 bromodon      | 5 Cytokine_Receptors  |
| C3AR1    | 719 compleme        | 12 Cytokine_Receptors |
| C5AR1    | 728 compleme        | 19 Cytokine_Receptors |
| CALCR    | 799 calcitonin      | 7 Cytokine_Receptors  |
| CALCRL   | 10203 calcitonin    | 2 Cytokine_Receptors  |
| ACKR2    | 1238 atypical ch    | 3 Cytokine_Receptors  |
| CCR1     | 1230 C-C motif      | 3 Cytokine_Receptors  |
| CCR10    | 2826 C-C motif      | 17 Cytokine_Receptors |
| CCR3     | 1232 C-C motif      | 3 Cytokine_Receptors  |
| CCR4     | 1233 C-C motif      | 3 Cytokine_Receptors  |
| CCR5     | 1234 C-C motif      | 3 Cytokine_Receptors  |
| CCR6     | 1235 C-C motif      | 6 Cytokine_Receptors  |
| CCR7     | 1236 C-C motif      | 17 Cytokine_Receptors |
| CCR8     | 1237 C-C motif      | 3 Cytokine_Receptors  |
| CCR9     | 10803 C-C motif     | 3 Cytokine_Receptors  |
| ACKR4    | 51554 atypical ch   | 3 Cytokine_Receptors  |
| CCRL2    | 9034 C-C motif      | 3 Cytokine_Receptors  |
| CD40     | 958 CD40 mole       | 20 Cytokine_Receptors |
| CMKLR1   | 1240 chemerin       | 12 Cytokine_Receptors |
| CNTR     | 1271 ciliary neur   | 9 Cytokine_Receptors  |
| CRHR1    | 1394 corticotrop    | 17 Cytokine_Receptors |
| CRHR2    | 1395 corticotrop    | 7 Cytokine_Receptors  |
| CRIM1    | 51232 cysteine ric  | 2 Cytokine_Receptors  |
| CRLF1    | 9244 cytokine re    | 19 Cytokine_Receptors |
| CRLF2    | 64109 cytokine re   | Cytokine_Receptors    |
| CRLF3    | 51379 cytokine re   | 17 Cytokine_Receptors |
| CSF1R    | 1436 colony stin    | 5 Cytokine_Receptors  |
| CSF2RA   | 1438 colony stin    | Cytokine_Receptors    |
| CSF2RB   | 1439 colony stin    | 22 Cytokine_Receptors |

|         |                                                    |                       |
|---------|----------------------------------------------------|-----------------------|
| CSF3R   | 1441 colony stim CD114 GCSF                        | 1 Cytokine_Receptors  |
| CX3CR1  | 1524 C-X3-C motif class 1 CM                       | 3 Cytokine_Receptors  |
| CXCR3   | 2833 C-X-C motif class 3 CD                        | Cytokine_Receptors    |
| CXCR4   | 7852 C-X-C motif class 4 D2                        | 2 Cytokine_Receptors  |
| CXCR5   | 643 C-X-C motif class 5 BLR1 CD18                  | 11 Cytokine_Receptors |
| CXCR6   | 10663 C-X-C motif class 6 BONZO CD                 | 3 Cytokine_Receptors  |
| ACKR3   | 57007 atypical chemokine receptor 3 CMKOR1 C       | 2 Cytokine_Receptors  |
| CYSLTR1 | 10800 cysteinyl leukotriene receptor 1 CY          | Cytokine_Receptors    |
| CYSLTR2 | 57105 cysteinyl leukotriene receptor 2 CY          | 13 Cytokine_Receptors |
| ACKR1   | 2532 atypical chemokine receptor 1 CD              | 1 Cytokine_Receptors  |
| EDNRA   | 1909 endothelin A ETA ET                           | 4 Cytokine_Receptors  |
| EDNRB   | 1910 endothelin B EDS ET                           | 13 Cytokine_Receptors |
| EGFR    | 1956 epidermal growth factor receptor ERBB         | 7 Cytokine_Receptors  |
| ENG     | 2022 endoglin HHT1                                 | 9 Cytokine_Receptors  |
| EPOR    | 2057 erythropoietin receptor EPO-R                 | 19 Cytokine_Receptors |
| ESR1    | 2099 estrogen receptor ESR ESR                     | 6 Cytokine_Receptors  |
| ESR2    | 2100 estrogen receptor-B ETA E                     | 14 Cytokine_Receptors |
| ESRRA   | 2101 estrogen receptor-1 ERRa                      | 11 Cytokine_Receptors |
| ESRRB   | 2103 estrogen receptor-2 DFNB35 EF                 | 14 Cytokine_Receptors |
| ESRRG   | 2104 estrogen receptor-gamma ERR-gam               | 1 Cytokine_Receptors  |
| FGFR1   | 2260 fibroblast growth factor receptor CD          | 8 Cytokine_Receptors  |
| FGFR2   | 2263 fibroblast growth factor receptor BEK F       | 10 Cytokine_Receptors |
| FGFR3   | 2261 fibroblast growth factor receptor CD33        | 4 Cytokine_Receptors  |
| FGFR4   | 2264 fibroblast growth factor receptor CD334 JTK   | 5 Cytokine_Receptors  |
| FGFRL1  | 53834 fibroblast growth factor receptor-like 1 FG  | 4 Cytokine_Receptors  |
| FLT1    | 2321 fms related tyrosine kinase FLT-1 F           | 13 Cytokine_Receptors |
| FLT3    | 2322 fms related tyrosine kinase CD135 FLK         | 13 Cytokine_Receptors |
| FLT4    | 2324 fms related tyrosine kinase CHTD7 FLT         | 5 Cytokine_Receptors  |
| FPR1    | 2357 formyl peptide receptor 1 FPR                 | 19 Cytokine_Receptors |
| FPR2    | 2358 formyl peptide receptor 2 ALXR FMLF           | 19 Cytokine_Receptors |
| FPR2    | 2358 formyl peptide receptor 2 ALXR FMLF           | 19 Cytokine_Receptors |
| FSHR    | 2492 follicle stimulating hormone receptor FSH     | 2 Cytokine_Receptors  |
| GALR2   | 8811 galanin receptor 2 GAL2-R G                   | 17 Cytokine_Receptors |
| GALR3   | 8484 galanin receptor 3                            | 22 Cytokine_Receptors |
| GCGR    | 2642 glucagon receptor GGR GL-R                    | 17 Cytokine_Receptors |
| GHR     | 2690 growth hormone receptor GHR GH                | 5 Cytokine_Receptors  |
| GHRHR   | 2692 growth hormone releasing hormone receptor GR  | 7 Cytokine_Receptors  |
| GHSR    | 2693 growth hormone secretagogue receptor GHDP     | 3 Cytokine_Receptors  |
| GIPR    | 2696 gastric inhibitory polypeptide receptor PGQL2 | 19 Cytokine_Receptors |
| GLP1R   | 2740 glucagon-like peptide 1 receptor GLP          | 6 Cytokine_Receptors  |
| GLP2R   | 9340 glucagon-like peptide 2 receptor              | 17 Cytokine_Receptors |
| GNRHR   | 2798 gonadotropin-releasing hormone receptor 1 G   | 4 Cytokine_Receptors  |
| GPB1    | 2852 G protein-coupled receptor 1 CEPR CMK         | 7 Cytokine_Receptors  |
| GPR17   | 2840 G protein-coupled receptor 17                 | 2 Cytokine_Receptors  |
| GPR32   | 2854 G protein-coupled receptor 32 RVDR1           | 19 Cytokine_Receptors |
| GPR33   | 2856 G protein-coupled receptor 33                 | 14 Cytokine_Receptors |
| PTGDR2  | 11251 prostaglandin G/H synthase 2 CD294 CR        | 11 Cytokine_Receptors |
| C5AR2   | 27202 complement component 5 L2 GPF7               | 19 Cytokine_Receptors |
| HNF4A   | 3172 hepatocyte nuclear factor 4A HNF              | 20 Cytokine_Receptors |
| HNF4G   | 3174 hepatocyte nuclear factor 4G NR               | 8 Cytokine_Receptors  |
| HTR3A   | 3359 5-hydroxytryptamine receptor 3A 5-HT-3 5      | 11 Cytokine_Receptors |
| HTR3B   | 9177 5-hydroxytryptamine receptor 3B 5-HT3B        | 11 Cytokine_Receptors |
| HTR3C   | 170572 5-hydroxytryptamine receptor 3C 5-HT3C      | 3 Cytokine_Receptors  |
| HTR3D   | 200909 5-hydroxytryptamine receptor 3D 5-HT3D      | 3 Cytokine_Receptors  |
| HTR3E   | 285242 5-hydroxytryptamine receptor 3E 5-HT3-E 5   | 3 Cytokine_Receptors  |
| IFNAR1  | 3454 interferon alpha AVP IFN-a                    | 21 Cytokine_Receptors |
| IFNAR2  | 3455 interferon beta IFN-B IFN-                    | 21 Cytokine_Receptors |
| IFNGR1  | 3459 interferon gamma CD119 IFN                    | 6 Cytokine_Receptors  |

|         |                                               |                       |
|---------|-----------------------------------------------|-----------------------|
| IFNGR2  | 3460 interferon $\gamma$ AF-1 IFGR2           | 21 Cytokine_Receptors |
| IGF1R   | 3480 insulin like CD221 IGF                   | 15 Cytokine_Receptors |
| IGF2R   | 3482 insulin like CD222 CI-                   | 6 Cytokine_Receptors  |
| IL10RA  | 3587 interleukin CD210 CD2                    | 11 Cytokine_Receptors |
| IL10RB  | 3588 interleukin CDW210B                      | 21 Cytokine_Receptors |
| IL11RA  | 3590 interleukin CRSDA                        | 9 Cytokine_Receptors  |
| IL12RB1 | 3594 interleukin CD212 IL-1                   | 19 Cytokine_Receptors |
| IL12RB2 | 3595 interleukin -                            | 1 Cytokine_Receptors  |
| IL13RA1 | 3597 interleukin CD213A1 CX                   | Cytokine_Receptors    |
| IL13RA2 | 3598 interleukin CD213A2 CX                   | Cytokine_Receptors    |
| IL15RA  | 3601 interleukin CD215                        | 10 Cytokine_Receptors |
| IL2RB   | 3560 interleukin CD122 IL15                   | 22 Cytokine_Receptors |
| IL17RA  | 23765 interleukin CANDF5 C                    | 22 Cytokine_Receptors |
| IL17RB  | 55540 interleukin CRL4 EVI27                  | 3 Cytokine_Receptors  |
| IL17RC  | 84818 interleukin CANDF9 IL                   | 3 Cytokine_Receptors  |
| IL17RD  | 54756 interleukin HH18 IL-17                  | 3 Cytokine_Receptors  |
| IL17RE  | 132014 interleukin -                          | 3 Cytokine_Receptors  |
| IL18R1  | 8809 interleukin CD218a CI                    | 2 Cytokine_Receptors  |
| IL18RAP | 8807 interleukin ACPL CD21                    | 2 Cytokine_Receptors  |
| IL1R1   | 3554 interleukin CD121A D                     | 2 Cytokine_Receptors  |
| IL1R2   | 7850 interleukin CD121b CI                    | 2 Cytokine_Receptors  |
| IL1RAP  | 3556 interleukin C3orf13 IL-                  | 3 Cytokine_Receptors  |
| IL1RL1  | 9173 interleukin DER4 FIT-1                   | 2 Cytokine_Receptors  |
| IL1RL2  | 8808 interleukin IL-1R $\alpha$  IL           | 2 Cytokine_Receptors  |
| IL20RA  | 53832 interleukin CRF2-8 IL-                  | 6 Cytokine_Receptors  |
| IL20RB  | 53833 interleukin DIRS1 FND                   | 3 Cytokine_Receptors  |
| IL21R   | 50615 interleukin CD360 IMC                   | 16 Cytokine_Receptors |
| IL22RA1 | 58985 interleukin CRF2-9 IL2                  | 1 Cytokine_Receptors  |
| IL22RA2 | 116379 interleukin CRF2-10 C                  | 6 Cytokine_Receptors  |
| IL23R   | 149233 interleukin -                          | 1 Cytokine_Receptors  |
| IL27RA  | 9466 interleukin CRL1 IL-27                   | 19 Cytokine_Receptors |
| IFNLR1  | 163702 interferon $\gamma$ CRF2/12 IF         | 1 Cytokine_Receptors  |
| IL2RA   | 3559 interleukin CD25 IDD $\alpha$            | 10 Cytokine_Receptors |
| IL2RB   | 3560 interleukin CD122 IL15                   | 22 Cytokine_Receptors |
| IL2RG   | 3561 interleukin CD132 CIDX                   | Cytokine_Receptors    |
| IL31RA  | 133396 interleukin CRL CRL3 C                 | 5 Cytokine_Receptors  |
| IL3RA   | 3563 interleukin CD123 IL3 $\beta$ X Y        | Cytokine_Receptors    |
| IL4R    | 3566 interleukin CD124 IL-4                   | 16 Cytokine_Receptors |
| IL5RA   | 3568 interleukin CD125 CD $\alpha$            | 3 Cytokine_Receptors  |
| IL6R    | 3570 interleukin CD126 IL-6                   | 1 Cytokine_Receptors  |
| IL7R    | 3575 interleukin CD127 CD $\alpha$            | 5 Cytokine_Receptors  |
| CXCR1   | 3577 C-X-C mo $\alpha$ C-C C-C-C              | 2 Cytokine_Receptors  |
| CXCR2   | 3579 C-X-C mo $\alpha$ CD182 CD $\alpha$      | 2 Cytokine_Receptors  |
| IL9R    | 3581 interleukin CD129 IL-5X Y                | Cytokine_Receptors    |
| INSR    | 3643 insulin rece $\alpha$ CD220 HH           | 19 Cytokine_Receptors |
| KDR     | 3791 kinase inseCD309 FLK                     | 4 Cytokine_Receptors  |
| LEPR    | 3953 leptin rece CD295 LEP                    | 1 Cytokine_Receptors  |
| LGR4    | 55366 leucine ric $\alpha$ BNMD17 C           | 11 Cytokine_Receptors |
| LGR5    | 8549 leucine ric $\alpha$ FEX GPR49           | 12 Cytokine_Receptors |
| LGR6    | 59352 leucine ric $\alpha$ GPCR VTS2          | 1 Cytokine_Receptors  |
| LHCGR   | 3973 luteinizing HHG LCGR                     | 2 Cytokine_Receptors  |
| LIFR    | 3977 LIF recept $\alpha$ CD118 LIF-           | 5 Cytokine_Receptors  |
| LTB4R   | 1241 leukotriene $\alpha$ BLT1 BLTR           | 14 Cytokine_Receptors |
| LTB4R2  | 56413 leukotriene $\alpha$ BLT2 BLTR $\alpha$ | 14 Cytokine_Receptors |
| LTBR    | 4055 lymphotox D12S370 L                      | 12 Cytokine_Receptors |
| MC1R    | 4157 melanocor CMM5 MS                        | 16 Cytokine_Receptors |
| MC2R    | 4158 melanocor ACTHR                          | 18 Cytokine_Receptors |
| MC3R    | 4159 melanocor BMIQ9 MC                       | 20 Cytokine_Receptors |

|        |                                                       |                       |
|--------|-------------------------------------------------------|-----------------------|
| MC4R   | 4160 melanocortin 4 receptor                          | 18 Cytokine_Receptors |
| MCHR1  | 2847 melanin-concentrating hormone receptor 1         | 22 Cytokine_Receptors |
| MCHR2  | 84539 melanin-concentrating hormone receptor 2        | 6 Cytokine_Receptors  |
| MET    | 4233 MET proto-oncogene                               | 7 Cytokine_Receptors  |
| MLNR   | 2862 motilin receptor                                 | 13 Cytokine_Receptors |
| MPL    | 4352 MPL proto-oncogene                               | 1 Cytokine_Receptors  |
| MTNR1A | 4543 melatonin receptor 1A                            | 4 Cytokine_Receptors  |
| MTNR1B | 4544 melatonin receptor 1B                            | 11 Cytokine_Receptors |
| NGFR   | 4804 nerve growth factor receptor                     | 17 Cytokine_Receptors |
| NMBR   | 4829 neuromedin B receptor                            | 6 Cytokine_Receptors  |
| NPR1   | 4881 natriuretic peptide receptor 1                   | 1 Cytokine_Receptors  |
| NPR3   | 4883 natriuretic peptide receptor 3                   | 5 Cytokine_Receptors  |
| NR0B1  | 190 nuclear receptor subfamily 0 class B member 1     | Cytokine_Receptors    |
| NR0B2  | 8431 nuclear receptor subfamily 0 class B member 2    | 1 Cytokine_Receptors  |
| NR1D1  | 9572 nuclear receptor subfamily 1 class D member 1    | 17 Cytokine_Receptors |
| NR1D2  | 9975 nuclear receptor subfamily 1 class D member 2    | 3 Cytokine_Receptors  |
| NR1H2  | 7376 nuclear receptor subfamily 1 class H member 2    | 19 Cytokine_Receptors |
| NR1H3  | 10062 nuclear receptor subfamily 1 class H member 3   | 11 Cytokine_Receptors |
| NR1H4  | 9971 nuclear receptor subfamily 1 class H member 4    | 12 Cytokine_Receptors |
| NR1I2  | 8856 nuclear receptor subfamily 1 class I member 2    | 3 Cytokine_Receptors  |
| NR1I3  | 9970 nuclear receptor subfamily 1 class I member 3    | 1 Cytokine_Receptors  |
| NR2C1  | 7181 nuclear receptor subfamily 2 class C member 1    | 12 Cytokine_Receptors |
| NR2C2  | 7182 nuclear receptor subfamily 2 class C member 2    | 3 Cytokine_Receptors  |
| NR2E1  | 7101 nuclear receptor subfamily 2 class E member 1    | 6 Cytokine_Receptors  |
| NR2E3  | 10002 nuclear receptor subfamily 2 class E member 3   | 15 Cytokine_Receptors |
| NR2F1  | 7025 nuclear receptor subfamily 2 class F member 1    | 5 Cytokine_Receptors  |
| NR2F2  | 7026 nuclear receptor subfamily 2 class F member 2    | 15 Cytokine_Receptors |
| NR2F6  | 2063 nuclear receptor subfamily 2 class F member 6    | 19 Cytokine_Receptors |
| NR3C1  | 2908 nuclear receptor subfamily 3 class C member 1    | 5 Cytokine_Receptors  |
| NR3C2  | 4306 nuclear receptor subfamily 3 class C member 2    | 4 Cytokine_Receptors  |
| NR4A1  | 3164 nuclear receptor subfamily 4 class A member 1    | 12 Cytokine_Receptors |
| NR4A2  | 4929 nuclear receptor subfamily 4 class A member 2    | 2 Cytokine_Receptors  |
| NR4A3  | 8013 nuclear receptor subfamily 4 class A member 3    | 9 Cytokine_Receptors  |
| NR5A1  | 2516 nuclear receptor subfamily 5 class A member 1    | 9 Cytokine_Receptors  |
| NR5A2  | 2494 nuclear receptor subfamily 5 class A member 2    | 1 Cytokine_Receptors  |
| NR6A1  | 2649 nuclear receptor subfamily 6 class A member 1    | 9 Cytokine_Receptors  |
| NRP1   | 8829 neuropilin 1                                     | 10 Cytokine_Receptors |
| NRP2   | 8828 neuropilin 2                                     | 2 Cytokine_Receptors  |
| OGFR   | 11054 opioid growth factor receptor                   | 20 Cytokine_Receptors |
| OPRD1  | 4985 opioid receptor delta                            | 1 Cytokine_Receptors  |
| OPRK1  | 4986 opioid receptor kappa                            | 8 Cytokine_Receptors  |
| OPRL1  | 4987 opioid receptor lambda                           | 20 Cytokine_Receptors |
| OPRM1  | 4988 opioid receptor mu                               | 6 Cytokine_Receptors  |
| OSMR   | 9180 oncostatin receptor                              | 5 Cytokine_Receptors  |
| OXTR   | 5021 oxytocin receptor                                | 3 Cytokine_Receptors  |
| PGR    | 5241 progesterone receptor                            | 11 Cytokine_Receptors |
| PGRMC2 | 10424 progesterone receptor membrane component 2      | 4 Cytokine_Receptors  |
| PLAUR  | 5329 plasminogen receptor                             | 19 Cytokine_Receptors |
| PLXNA1 | 5361 plexin A1                                        | 3 Cytokine_Receptors  |
| PLXNA2 | 5362 plexin A2                                        | 1 Cytokine_Receptors  |
| PLXNA3 | 55558 plexin A3                                       | Cytokine_Receptors    |
| PLXNA4 | 91584 plexin A4                                       | 7 Cytokine_Receptors  |
| PLXNB1 | 5364 plexin B1                                        | 3 Cytokine_Receptors  |
| PLXNB2 | 23654 plexin B2                                       | 22 Cytokine_Receptors |
| PLXNB3 | 5365 plexin B3                                        | Cytokine_Receptors    |
| PLXNC1 | 10154 plexin C1                                       | 12 Cytokine_Receptors |
| PLXND1 | 23129 plexin D1                                       | 3 Cytokine_Receptors  |
| PPARA  | 5465 peroxisome proliferator-activated receptor alpha | 22 Cytokine_Receptors |

|           |                             |                       |
|-----------|-----------------------------|-----------------------|
| PPARD     | 5467 peroxisomFAAR NR10     | 6 Cytokine_Receptors  |
| PPARG     | 5468 peroxisomC1MT1 GLA     | 3 Cytokine_Receptors  |
| PRLHR     | 2834 prolactin rGPR10 GR3   | 10 Cytokine_Receptors |
| PRLR      | 5618 prolactin rHPRL MFA    | 5 Cytokine_Receptors  |
| PTAFR     | 5724 platelet actPAFR       | 1 Cytokine_Receptors  |
| PTGDR     | 5729 prostaglan AS1 ASRT1   | 14 Cytokine_Receptors |
| PTGDS     | 5730 prostaglan L-PGDS LP   | 9 Cytokine_Receptors  |
| PTGER1    | 5731 prostaglan EP1         | 19 Cytokine_Receptors |
| PTGER2    | 5732 prostaglan EP2         | 14 Cytokine_Receptors |
| PTGER3    | 5733 prostaglan EP3 EP3- I  | 1 Cytokine_Receptors  |
| PTGER4    | 5734 prostaglan EP4 EP4R    | 5 Cytokine_Receptors  |
| PTGFR     | 5737 prostaglan FP          | 1 Cytokine_Receptors  |
| PTH1R     | 5745 parathyroicEKNS PFE F  | 3 Cytokine_Receptors  |
| PTH2R     | 5746 parathyroicPTHR2       | 2 Cytokine_Receptors  |
| RARA      | 5914 retinoic aciNR1B1 RAI  | 17 Cytokine_Receptors |
| RARB      | 5915 retinoic aciHAP MCOI   | 3 Cytokine_Receptors  |
| RARG      | 5916 retinoic aciNR1B3 RAI  | 12 Cytokine_Receptors |
| ROBO1     | 6091 roundabouDUTT1 SA>     | 3 Cytokine_Receptors  |
| ROBO2     | 6092 roundabouSAX3          | 3 Cytokine_Receptors  |
| ROBO3     | 64221 roundabouHGPPS HG     | 11 Cytokine_Receptors |
| RORA      | 6095 RAR relateIDDECA NI    | 15 Cytokine_Receptors |
| RORB      | 6096 RAR relateEIG15 NR1    | 9 Cytokine_Receptors  |
| RORC      | 6097 RAR relateIMD42 NR     | 1 Cytokine_Receptors  |
| RXFP1     | 59350 relaxin famLGR7 RXFP  | 4 Cytokine_Receptors  |
| RXFP2     | 122042 relaxin famGPR106 GF | 13 Cytokine_Receptors |
| RXFP3     | 51289 relaxin famGPCR135 F  | 5 Cytokine_Receptors  |
| RXRA      | 6256 retinoid X iNR2B1      | 9 Cytokine_Receptors  |
| RXRB      | 6257 retinoid X iDAUDI6 H   | 6 Cytokine_Receptors  |
| RXRG      | 6258 retinoid X iNR2B3 RXF  | 1 Cytokine_Receptors  |
| S1PR1     | 1901 sphingosinCD363 CHI    | 1 Cytokine_Receptors  |
| S1PR2     | 9294 sphingosinAGR16 DFI    | 19 Cytokine_Receptors |
| SCTR      | 6344 secretin reSR          | 2 Cytokine_Receptors  |
| SDC1      | 6382 syndecan 1CD138 SDC    | 2 Cytokine_Receptors  |
| SDC2      | 6383 syndecan 2CD362 HSF    | 8 Cytokine_Receptors  |
| SDC3      | 9672 syndecan 3SDCN SYN     | 1 Cytokine_Receptors  |
| SDC4      | 6385 syndecan 4SYND4        | 20 Cytokine_Receptors |
| SORT1     | 6272 sortilin 1 Gp95 LDLC   | 1 Cytokine_Receptors  |
| SSTR1     | 6751 somatostaSRIF-2 SS-    | 14 Cytokine_Receptors |
| SSTR2     | 6752 somatosta-             | 17 Cytokine_Receptors |
| SSTR5     | 6755 somatostaSS-5-R        | 16 Cytokine_Receptors |
| ST2       | 6761 - -                    | 11 Cytokine_Receptors |
| TACR1     | 6869 tachykinin NK1R NKIR   | 2 Cytokine_Receptors  |
| TEK       | 7010 TEK receptCD202B GI    | 9 Cytokine_Receptors  |
| TGFBR1    | 7046 transformirAAT5 ACVI   | 9 Cytokine_Receptors  |
| TGFBR2    | 7048 transformirAAT3 FAA3   | 3 Cytokine_Receptors  |
| TGFBR3    | 7049 transformirBGCAN be    | 1 Cytokine_Receptors  |
| THRA      | 7067 thyroid hoAR7 CHNG     | 17 Cytokine_Receptors |
| THRB      | 7068 thyroid hoC-ERBA-2     | 3 Cytokine_Receptors  |
| TIE1      | 7075 tyrosine kirJTK14 TIE  | 1 Cytokine_Receptors  |
| TNFRSF10/ | 8797 TNF receptAPO2 CD2     | 8 Cytokine_Receptors  |
| TNFRSF10/ | 8795 TNF receptCD262 DR     | 8 Cytokine_Receptors  |
| TNFRSF10/ | 8794 TNF receptCD263 DCI    | 8 Cytokine_Receptors  |
| TNFRSF10/ | 8793 TNF receptCD264 DCI    | 8 Cytokine_Receptors  |
| TNFRSF11/ | 8792 TNF receptCD265 FEC    | 18 Cytokine_Receptors |
| TNFRSF12/ | 51330 TNF receptCD266 FN1   | 16 Cytokine_Receptors |
| TNFRSF13/ | 23495 TNF receptCD267 CVI   | 17 Cytokine_Receptors |
| TNFRSF13/ | 115650 TNF receptBAFF-R BA  | 22 Cytokine_Receptors |
| TNFRSF14  | 8764 TNF receptATAR CD2     | 1 Cytokine_Receptors  |



|          |                    |              |                        |
|----------|--------------------|--------------|------------------------|
| TNFRSF17 | 608 TNF recept     | BCM BCM/     | 16 Cytokine_Receptors  |
| TNFRSF18 | 8784 TNF recept    | AITR CD35    | 1 Cytokine_Receptors   |
| TNFRSF19 | 55504 TNF recept   | TAJ TAJ-al   | 13 Cytokine_Receptors  |
| TNFRSF1A | 7132 TNF recept    | CD120a FP    | 12 Cytokine_Receptors  |
| TNFRSF1B | 7133 TNF recept    | CD120b TE    | 1 Cytokine_Receptors   |
| TNFRSF21 | 27242 TNF recept   | BM-018 CI    | 6 Cytokine_Receptors   |
| TNFRSF25 | 8718 TNF recept    | APO-3 DD     | 1 Cytokine_Receptors   |
| TNFRSF4  | 7293 TNF recept    | ACT35 CD:    | 1 Cytokine_Receptors   |
| TNFRSF6B | 8771 TNF recept    | DCR3 DJ58    | 20 Cytokine_Receptors  |
| TNFRSF8  | 943 TNF recept     | CD30 D1S1    | 1 Cytokine_Receptors   |
| TNFRSF9  | 3604 TNF recept    | 4-1BB CD1    | 1 Cytokine_Receptors   |
| TRHR     | 7201 thyrotropir   | CHNG7 TR     | 8 Cytokine_Receptors   |
| TSHR     | 7253 thyroid stir  | CHNG1 LG     | 14 Cytokine_Receptors  |
| TUBB3    | 10381 tubulin bet  | CDCBM CC     | 16 Cytokine_Receptors  |
| VDR      | 7421 vitamin D r   | NR1I1 PPP    | 12 Cytokine_Receptors  |
| VIPR1    | 7433 vasoactive    | HVR1 III PA  | 3 Cytokine_Receptors   |
| VIPR2    | 7434 vasoactive    | C16DUPq3     | 7 Cytokine_Receptors   |
| XCR1     | 2829 X-C motif     | CCXCR1 GI    | 3 Cytokine_Receptors   |
| IFNA10   | 3446 interferon    | IFN-alphaC   | 9 Interferons          |
| IFNA13   | 3447 interferon    | -            | 9 Interferons          |
| IFNA14   | 3448 interferon    | IFN-alpha    | 9 Interferons          |
| IFNA16   | 3449 interferon    | IFN-alpha-   | 9 Interferons          |
| IFNA17   | 3451 interferon    | IFN-alpha    | 9 Interferons          |
| IFNA2    | 3440 interferon    | IFN-alpha-   | 9 Interferons          |
| IFNA21   | 3452 interferon    | IFN-alpha    | 9 Interferons          |
| IFNA4    | 3441 interferon    | IFN-alpha    | 9 Interferons          |
| IFNA5    | 3442 interferon    | IFN-alpha-   | 9 Interferons          |
| IFNA6    | 3443 interferon    | IFN-alpha    | 9 Interferons          |
| IFNA7    | 3444 interferon    | IFN-alpha    | 9 Interferons          |
| IFNA8    | 3445 interferon    | IFN-alpha    | 9 Interferons          |
| IFNB1    | 3456 interferon    | IFB IFF IFN- | 9 Interferons          |
| IFNE     | 338376 interferon  | IFN-E IFNE   | 9 Interferons          |
| IFNG     | 3458 interferon    | IFG IFI      | 12 Interferons         |
| IFNK     | 56832 interferon   | IFNT1 INFE   | 9 Interferons          |
| IFNW1    | 3467 interferon    | -            | 9 Interferons          |
| IFNAR2   | 3455 interferon    | IFN-R IFN-   | 21 Interferon_Receptor |
| IFNGR1   | 3459 interferon    | CD119 IFN    | 6 Interferon_Receptor  |
| IFNGR2   | 3460 interferon    | AF-1 IFGR    | 21 Interferon_Receptor |
| IL11     | 3589 interleukin   | AGIF IL-11   | 19 Interleukins        |
| IL12A    | 3592 interleukin   | CLMF IL-1    | 3 Interleukins         |
| IL12B    | 3593 interleukin   | CLMF CLM     | 5 Interleukins         |
| IL13     | 3596 interleukin   | IL-13 P600   | 5 Interleukins         |
| IL15     | 3600 interleukin   | IL-15        | 4 Interleukins         |
| IL16     | 3603 interleukin   | LCF NIL16    | 15 Interleukins        |
| IL17A    | 3605 interleukin   | CTLA-8 CT    | 6 Interleukins         |
| IL17B    | 27190 interleukin  | IL-17B IL-2  | 5 Interleukins         |
| IL17C    | 27189 interleukin  | CX2 IL-17C   | 16 Interleukins        |
| IL17D    | 53342 interleukin  | IL-17D       | 13 Interleukins        |
| IL17F    | 112744 interleukin | CANDF6 IL    | 6 Interleukins         |
| IL18     | 3606 interleukin   | IGIF IL-18 I | 11 Interleukins        |
| IL19     | 29949 interleukin  | IL-10C MD    | 1 Interleukins         |
| IL1A     | 3552 interleukin   | IL-1 alpha   | 2 Interleukins         |
| IL1B     | 3553 interleukin   | IL-1 IL1-BE  | 2 Interleukins         |
| IL1F10   | 84639 interleukin  | FIL1-theta   | 2 Interleukins         |
| IL36RN   | 26525 interleukin  | FIL1 FIL1(D  | 2 Interleukins         |
| IL36A    | 27179 interleukin  | FIL1 FIL1(E  | 2 Interleukins         |
| IL37     | 27178 interleukin  | FIL1 FIL1(Z  | 2 Interleukins         |
| IL36B    | 27177 interleukin  | FIL1 FIL1-(I | 2 Interleukins         |

|         |                                |                          |
|---------|--------------------------------|--------------------------|
| IL36G   | 56300 interleukin IL-1F9 IL-1  | 2 Interleukins           |
| IL1RN   | 3557 interleukin DIRA ICIL-    | 2 Interleukins           |
| IL2     | 3558 interleukin IL-2 TCGF     | 4 Interleukins           |
| IL20    | 50604 interleukin IL-20 IL10   | 1 Interleukins           |
| IL21    | 59067 interleukin CVID11 IL-   | 4 Interleukins           |
| IL22    | 50616 interleukin IL-21 IL-22  | 12 Interleukins          |
| IL23A   | 51561 interleukin IL-23 IL-23  | 12 Interleukins          |
| IL24    | 11009 interleukin C49A FISP    | 1 Interleukins           |
| IL25    | 64806 interleukin IL17E        | 14 Interleukins          |
| IL26    | 55801 interleukin AK155 IL-2   | 12 Interleukins          |
| IL27    | 246778 interleukin IL-27 IL-27 | 16 Interleukins          |
| IFNL2   | 282616 interferon  IL-28A IL28 | 19 Interleukins          |
| IFNL3   | 282617 interferon  IFN-lambda  | 19 Interleukins          |
| IFNL1   | 282618 interferon  IL-29 IL29  | 19 Interleukins          |
| IL3     | 3562 interleukin IL-3 MCGF     | 5 Interleukins           |
| IL31    | 386653 interleukin IL-31       | 12 Interleukins          |
| IL32    | 9235 interleukin IL-32alpha    | 16 Interleukins          |
| IL33    | 90865 interleukin C9orf26 D\   | 9 Interleukins           |
| IL34    | 146433 interleukin C16orf77 IL | 16 Interleukins          |
| IL4     | 3565 interleukin BCGF-1 BC     | 5 Interleukins           |
| IL5     | 3567 interleukin EDF IL-5 TI   | 5 Interleukins           |
| IL6     | 3569 interleukin BSF-2 BSF2    | 7 Interleukins           |
| IL6ST   | 3572 interleukin CD130 CD\     | 5 Interleukins           |
| IL7     | 3574 interleukin IL-7          | 8 Interleukins           |
| CXCL8   | 3576 C-X-C motif GCP-1 GCI     | 4 Interleukins           |
| IL9     | 3578 interleukin HP40 IL-9     | 5 Interleukins           |
| TXLNA   | 200081 taxilin alpha IL14 TXLN | 1 Interleukins           |
| IL10RA  | 3587 interleukin CD210 CD2     | 11 Interleukins_Receptor |
| IL10RB  | 3588 interleukin CDW210B       | 21 Interleukins_Receptor |
| IL11RA  | 3590 interleukin CRSDA         | 9 Interleukins_Receptor  |
| IL12RB1 | 3594 interleukin CD212 IL-1    | 19 Interleukins_Receptor |
| IL12RB2 | 3595 interleukin -             | 1 Interleukins_Receptor  |
| IL13RA1 | 3597 interleukin CD213A1 CX    | Interleukins_Receptor    |
| IL13RA2 | 3598 interleukin CD213A2 CX    | Interleukins_Receptor    |
| IL15RA  | 3601 interleukin CD215         | 10 Interleukins_Receptor |
| IL2RB   | 3560 interleukin CD122 IL15    | 22 Interleukins_Receptor |
| IL17RA  | 23765 interleukin CANDF5 C     | 22 Interleukins_Receptor |
| IL17RB  | 55540 interleukin CRL4 EVI27   | 3 Interleukins_Receptor  |
| IL17RC  | 84818 interleukin CANDF9 IL    | 3 Interleukins_Receptor  |
| IL17RD  | 54756 interleukin HH18 IL-17   | 3 Interleukins_Receptor  |
| IL17RE  | 132014 interleukin -           | 3 Interleukins_Receptor  |
| IL18R1  | 8809 interleukin CD218a CI     | 2 Interleukins_Receptor  |
| IL18RAP | 8807 interleukin ACPL CD21     | 2 Interleukins_Receptor  |
| IL1R1   | 3554 interleukin CD121A D      | 2 Interleukins_Receptor  |
| IL1R2   | 7850 interleukin CD121b CI     | 2 Interleukins_Receptor  |
| IL1RAP  | 3556 interleukin C3orf13 IL-   | 3 Interleukins_Receptor  |
| IL1RL1  | 9173 interleukin DER4 FIT-1    | 2 Interleukins_Receptor  |
| IL1RL2  | 8808 interleukin IL-1Rrp2 IL   | 2 Interleukins_Receptor  |
| IL20RA  | 53832 interleukin CRF2-8 IL-   | 6 Interleukins_Receptor  |
| IL20RB  | 53833 interleukin DIRS1 FND    | 3 Interleukins_Receptor  |
| IL21R   | 50615 interleukin CD360 IMI    | 16 Interleukins_Receptor |
| IL22RA1 | 58985 interleukin CRF2-9 IL2   | 1 Interleukins_Receptor  |
| IL22RA2 | 116379 interleukin CRF2-10 C   | 6 Interleukins_Receptor  |
| IL23R   | 149233 interleukin -           | 1 Interleukins_Receptor  |
| IL27RA  | 9466 interleukin CRL1 IL-27    | 19 Interleukins_Receptor |
| IFNLR1  | 163702 interferon  CRF2/12 IF  | 1 Interleukins_Receptor  |
| IL2RA   | 3559 interleukin CD25 IDDM     | 10 Interleukins_Receptor |
| IL2RB   | 3560 interleukin CD122 IL15    | 22 Interleukins_Receptor |

|          |                                 |                                    |
|----------|---------------------------------|------------------------------------|
| IL2RG    | 3561 interleukin CD132 CDX      | Interleukins_Receptor              |
| IL31RA   | 133396 interleukin CRL CRL3 C   | 5 Interleukins_Receptor            |
| IL3RA    | 3563 interleukin CD123 IL3 X Y  | Interleukins_Receptor              |
| IL4R     | 3566 interleukin CD124 IL-4     | 16 Interleukins_Receptor           |
| IL5RA    | 3568 interleukin CD125 CD4      | 3 Interleukins_Receptor            |
| IL6R     | 3570 interleukin CD126 IL-6     | 1 Interleukins_Receptor            |
| IL7R     | 3575 interleukin CD127 CD4      | 5 Interleukins_Receptor            |
| CXCR1    | 3577 C-X-C mo: C-C C-C-C        | 2 Interleukins_Receptor            |
| CXCR2    | 3579 C-X-C mo: CD182 CD4        | 2 Interleukins_Receptor            |
| IL9R     | 3581 interleukin CD129 IL-9 X Y | Interleukins_Receptor              |
| ST2      | 6761 - -                        | 11 Interleukins_Receptor           |
| HLA-A    | 3105 major histcHLAA            | 6 NaturalKiller_Cell_Cytotoxicity  |
| HLA-B    | 3106 major histcAS B-4901       | 6 NaturalKiller_Cell_Cytotoxicity  |
| HLA-C    | 3107 major histcD6S204 HL       | 6 NaturalKiller_Cell_Cytotoxicity  |
| HLA-E    | 3133 major histcHLA-6.2 Q       | 6 NaturalKiller_Cell_Cytotoxicity  |
| HLA-G    | 3135 major histcMHC-G           | 6 NaturalKiller_Cell_Cytotoxicity  |
| KIR3DL1  | 3811 killer cell irCD158E1 K    | 19 NaturalKiller_Cell_Cytotoxicity |
| KIR3DL2  | 3812 killer cell ir3DL2 CD15    | 19 NaturalKiller_Cell_Cytotoxicity |
| KIR2DL1  | 3802 killer cell irCD158A KI    | 19 NaturalKiller_Cell_Cytotoxicity |
| KIR2DL2  | 3803 killer cell irCD158B1 C    | 19 NaturalKiller_Cell_Cytotoxicity |
| KIR2DL3  | 3804 killer cell irCD158B2 C    | 19 NaturalKiller_Cell_Cytotoxicity |
| KIR2DL4  | 3805 killer cell irCD158D G     | 19 NaturalKiller_Cell_Cytotoxicity |
| KIR2DL5A | 57292 killer cell irCD158F KI   | 19 NaturalKiller_Cell_Cytotoxicity |
| KLRC1    | 3821 killer cell leCD159A N     | 12 NaturalKiller_Cell_Cytotoxicity |
| KLRC2    | 3822 killer cell leCD159c N     | 12 NaturalKiller_Cell_Cytotoxicity |
| KLRC3    | 3823 killer cell leNKG2-E NI    | 12 NaturalKiller_Cell_Cytotoxicity |
| KLRD1    | 3824 killer cell leCD94         | 12 NaturalKiller_Cell_Cytotoxicity |
| PTPN6    | 5777 protein tyr:HCP HCPH       | 12 NaturalKiller_Cell_Cytotoxicity |
| PTPN11   | 5781 protein tyr:BTP3 CFC       | 12 NaturalKiller_Cell_Cytotoxicity |
| ICAM1    | 3383 intercellulaBB2 CD54 I     | 19 NaturalKiller_Cell_Cytotoxicity |
| ICAM2    | 3384 intercellulaCD102          | 17 NaturalKiller_Cell_Cytotoxicity |
| ITGAL    | 3683 integrin su CD11A LFA      | 16 NaturalKiller_Cell_Cytotoxicity |
| ITGB2    | 3689 integrin su CD18 LAD       | 21 NaturalKiller_Cell_Cytotoxicity |
| PTK2B    | 2185 protein tyr:CADTK CA       | 8 NaturalKiller_Cell_Cytotoxicity  |
| VAV3     | 10451 vav guanin -              | 1 NaturalKiller_Cell_Cytotoxicity  |
| VAV1     | 7409 vav guaninVAV              | 19 NaturalKiller_Cell_Cytotoxicity |
| VAV2     | 7410 vav guaninVAV-2            | 9 NaturalKiller_Cell_Cytotoxicity  |
| RAC1     | 5879 Rac family MIG5 MRD        | 7 NaturalKiller_Cell_Cytotoxicity  |
| RAC2     | 5880 Rac family EN-7 Gx H       | 22 NaturalKiller_Cell_Cytotoxicity |
| RAC3     | 5881 Rac family -               | 17 NaturalKiller_Cell_Cytotoxicity |
| PAK1     | 5058 p21 (RAC1 IDDMSSD I        | 11 NaturalKiller_Cell_Cytotoxicity |
| MAP2K1   | 5604 mitogen-aCFC3 MAP          | 15 NaturalKiller_Cell_Cytotoxicity |
| MAP2K2   | 5605 mitogen-aCFC4 MAP          | 19 NaturalKiller_Cell_Cytotoxicity |
| MAPK1    | 5594 mitogen-aERK ERK-2         | 22 NaturalKiller_Cell_Cytotoxicity |
| MAPK3    | 5595 mitogen-aERK-1 ERK         | 16 NaturalKiller_Cell_Cytotoxicity |
| TNF      | 7124 tumor necrDIF TNF-a        | 6 NaturalKiller_Cell_Cytotoxicity  |
| CSF2     | 1437 colony stinCSF GMCS        | 5 NaturalKiller_Cell_Cytotoxicity  |
| IFNG     | 3458 interferon  IFG IFI        | 12 NaturalKiller_Cell_Cytotoxicity |
| KIR2DS1  | 3806 killer cell irCD158H CI    | 19 NaturalKiller_Cell_Cytotoxicity |
| KIR2DS3  | 3808 killer cell irNKAT7        | 19 NaturalKiller_Cell_Cytotoxicity |
| KIR2DS4  | 3809 killer cell irCD158I KIR   | 19 NaturalKiller_Cell_Cytotoxicity |
| KIR2DS5  | 3810 killer cell irCD158G N     | 19 NaturalKiller_Cell_Cytotoxicity |
| NCR2     | 9436 natural cyt CD336 LY9      | 6 NaturalKiller_Cell_Cytotoxicity  |
| TYROBP   | 7305 transmemkDAP12 KAI         | 19 NaturalKiller_Cell_Cytotoxicity |
| LCK      | 3932 LCK proto-IMD22 LSK        | 1 NaturalKiller_Cell_Cytotoxicity  |
| FCGR3A   | 2214 Fc fragmerCD16 CD16        | 1 NaturalKiller_Cell_Cytotoxicity  |
| FCGR3B   | 2215 Fc fragmerCD16 CD16        | 1 NaturalKiller_Cell_Cytotoxicity  |
| NCR1     | 9437 natural cyt CD335 LY9      | 19 NaturalKiller_Cell_Cytotoxicity |

|        |          |                         |                                    |
|--------|----------|-------------------------|------------------------------------|
| NCR3   | 259197   | natural cyt1C7 CD337    | 6 NaturalKiller_Cell_Cytotoxicity  |
| FCER1G | 2207     | Fc fragmerFCRG          | 1 NaturalKiller_Cell_Cytotoxicity  |
| CD247  | 919      | CD247 mo CD3-ZETA       | 1 NaturalKiller_Cell_Cytotoxicity  |
| ZAP70  | 7535     | zeta chain ADMIO2 IM    | 2 NaturalKiller_Cell_Cytotoxicity  |
| SYK    | 6850     | spleen asscp72-Syk      | 9 NaturalKiller_Cell_Cytotoxicity  |
| LCP2   | 3937     | lymphocyteSLP-76 SLF    | 5 NaturalKiller_Cell_Cytotoxicity  |
| LAT    | 27040    | linker for a IMD52 LAT  | 16 NaturalKiller_Cell_Cytotoxicity |
| PLCG1  | 5335     | phospholipNCKAP3 PI     | 20 NaturalKiller_Cell_Cytotoxicity |
| PLCG2  | 5336     | phospholipAPLAID FC     | 16 NaturalKiller_Cell_Cytotoxicity |
| SH3BP2 | 6452     | SH3 domain3BP-2 3BP     | 4 NaturalKiller_Cell_Cytotoxicity  |
| PIK3CA | 5290     | phosphaticCLAPO CLC     | 3 NaturalKiller_Cell_Cytotoxicity  |
| PIK3CB | 5291     | phosphaticP110BETA      | 3 NaturalKiller_Cell_Cytotoxicity  |
| PIK3CD | 5293     | phosphaticAPDS IMD      | 1 NaturalKiller_Cell_Cytotoxicity  |
| PIK3CG | 5294     | phosphaticPI3CG PI3K    | 7 NaturalKiller_Cell_Cytotoxicity  |
| PIK3R5 | 23533    | phosphoin F730038 1     | 17 NaturalKiller_Cell_Cytotoxicity |
| PIK3R1 | 5295     | phosphoin AGM7 GRE      | 5 NaturalKiller_Cell_Cytotoxicity  |
| PIK3R2 | 5296     | phosphoin MPPH MPH      | 19 NaturalKiller_Cell_Cytotoxicity |
| PIK3R3 | 8503     | phosphoin p55 p55-G     | 1 NaturalKiller_Cell_Cytotoxicity  |
| FYN    | 2534     | FYN proto-SLK SYN p     | 6 NaturalKiller_Cell_Cytotoxicity  |
| SHC2   | 25759    | SHC adapt SCK SHCB      | 19 NaturalKiller_Cell_Cytotoxicity |
| SHC4   | 399694   | SHC adapt RaLP SHCE     | 15 NaturalKiller_Cell_Cytotoxicity |
| SHC3   | 53358    | SHC adapt N-Shc NSH     | 9 NaturalKiller_Cell_Cytotoxicity  |
| SHC1   | 6464     | SHC adapt SHC SHCA      | 1 NaturalKiller_Cell_Cytotoxicity  |
| GRB2   | 2885     | growth facASH EGFR      | 17 NaturalKiller_Cell_Cytotoxicity |
| SOS1   | 6654     | SOS Ras/R.GF1 GGF1      | 2 NaturalKiller_Cell_Cytotoxicity  |
| SOS2   | 6655     | SOS Ras/RINS9 SOS-2     | 14 NaturalKiller_Cell_Cytotoxicity |
| HRAS   | 3265     | HRas protcC-BAS/HA      | 11 NaturalKiller_Cell_Cytotoxicity |
| KRAS   | 3845     | KRAS protcC-K-RAS C     | 12 NaturalKiller_Cell_Cytotoxicity |
| NRAS   | 4893     | NRAS prot ALPS4 CMI     | 1 NaturalKiller_Cell_Cytotoxicity  |
| ARAF   | 369      | A-Raf prot A-RAF AR/X   | NaturalKiller_Cell_Cytotoxicity    |
| BRAF   | 673      | B-Raf prot B-RAF1 B-    | 7 NaturalKiller_Cell_Cytotoxicity  |
| RAF1   | 5894     | Raf-1 prot CMD1NN C     | 3 NaturalKiller_Cell_Cytotoxicity  |
| MICA   | 1.01E+08 | MHC class MIC-A PER     | 6 NaturalKiller_Cell_Cytotoxicity  |
| MICB   | 4277     | MHC class PERB11.2      | 6 NaturalKiller_Cell_Cytotoxicity  |
| ULBP3  | 79465    | UL16 bindi N2DL-3 NI    | 6 NaturalKiller_Cell_Cytotoxicity  |
| ULBP2  | 80328    | UL16 bindi ALCAN-al     | 6 NaturalKiller_Cell_Cytotoxicity  |
| ULBP1  | 80329    | UL16 bindi N2DL-1 NI    | 6 NaturalKiller_Cell_Cytotoxicity  |
| KLRK1  | 22914    | killer cell leCD314 D12 | 12 NaturalKiller_Cell_Cytotoxicity |
| HCST   | 10870    | hematopoiDAP10 KA       | 19 NaturalKiller_Cell_Cytotoxicity |
| CD48   | 962      | CD48 mole BCM1 BLA      | 1 NaturalKiller_Cell_Cytotoxicity  |
| CD244  | 51744    | CD244 mo 2B4 NAIL N     | 1 NaturalKiller_Cell_Cytotoxicity  |
| PPP3CA | 5530     | protein ph ACCIID CA    | 4 NaturalKiller_Cell_Cytotoxicity  |
| PPP3CB | 5532     | protein ph CALNA2 C     | 10 NaturalKiller_Cell_Cytotoxicity |
| PPP3CC | 5533     | protein ph CALNA3 C     | 8 NaturalKiller_Cell_Cytotoxicity  |
| CHP1   | 11261    | calcineurin CHP SLC9    | 15 NaturalKiller_Cell_Cytotoxicity |
| PPP3R1 | 5534     | protein ph CALNB1 CI    | 2 NaturalKiller_Cell_Cytotoxicity  |
| PPP3R2 | 5535     | protein ph PPP3RL       | 9 NaturalKiller_Cell_Cytotoxicity  |
| CHP2   | 63928    | calcineurin -           | 16 NaturalKiller_Cell_Cytotoxicity |
| NFAT5  | 10725    | nuclear facNF-AT5 NF    | 16 NaturalKiller_Cell_Cytotoxicity |
| NFATC1 | 4772     | nuclear facNF-ATC NI    | 18 NaturalKiller_Cell_Cytotoxicity |
| NFATC2 | 4773     | nuclear facNFAT1 NF     | 20 NaturalKiller_Cell_Cytotoxicity |
| NFATC3 | 4775     | nuclear facNF-AT4c N    | 16 NaturalKiller_Cell_Cytotoxicity |
| NFATC4 | 4776     | nuclear facNF-AT3 NF    | 14 NaturalKiller_Cell_Cytotoxicity |
| PRKCA  | 5578     | protein kinAAG6 PKC     | 17 NaturalKiller_Cell_Cytotoxicity |
| PRKCB  | 5579     | protein kinPKC-beta P   | 16 NaturalKiller_Cell_Cytotoxicity |
| PRKCG  | 5582     | protein kinPKC-gamn     | 19 NaturalKiller_Cell_Cytotoxicity |
| SH2D1B | 117157   | SH2 domainEAT2          | 1 NaturalKiller_Cell_Cytotoxicity  |
| SH2D1A | 4068     | SH2 domainDSHP EBV/X    | NaturalKiller_Cell_Cytotoxicity    |

|           |                               |                                    |
|-----------|-------------------------------|------------------------------------|
| IFNGR1    | 3459 interferon (CD119 IFN    | 6 NaturalKiller_Cell_Cytotoxicity  |
| IFNGR2    | 3460 interferon (AF-1 IFGR    | 21 NaturalKiller_Cell_Cytotoxicity |
| IFNA1     | 3439 interferon (IFL IFN IFN  | 9 NaturalKiller_Cell_Cytotoxicity  |
| IFNA2     | 3440 interferon (IFN-alpha-   | 9 NaturalKiller_Cell_Cytotoxicity  |
| IFNA4     | 3441 interferon (IFN-alpha-   | 9 NaturalKiller_Cell_Cytotoxicity  |
| IFNA5     | 3442 interferon (IFN-alpha-   | 9 NaturalKiller_Cell_Cytotoxicity  |
| IFNA6     | 3443 interferon (IFN-alpha-   | 9 NaturalKiller_Cell_Cytotoxicity  |
| IFNA7     | 3444 interferon (IFN-alpha-   | 9 NaturalKiller_Cell_Cytotoxicity  |
| IFNA8     | 3445 interferon (IFN-alpha-   | 9 NaturalKiller_Cell_Cytotoxicity  |
| IFNA10    | 3446 interferon (IFN-alpha-   | 9 NaturalKiller_Cell_Cytotoxicity  |
| IFNA13    | 3447 interferon (-            | 9 NaturalKiller_Cell_Cytotoxicity  |
| IFNA14    | 3448 interferon (IFN-alpha-   | 9 NaturalKiller_Cell_Cytotoxicity  |
| IFNA16    | 3449 interferon (IFN-alpha-   | 9 NaturalKiller_Cell_Cytotoxicity  |
| IFNA17    | 3451 interferon (IFN-alpha-   | 9 NaturalKiller_Cell_Cytotoxicity  |
| IFNA21    | 3452 interferon (IFN-alpha-   | 9 NaturalKiller_Cell_Cytotoxicity  |
| IFNB1     | 3456 interferon (IFB IFF IFN- | 9 NaturalKiller_Cell_Cytotoxicity  |
| IFNAR1    | 3454 interferon (AVP IFN-a    | 21 NaturalKiller_Cell_Cytotoxicity |
| IFNAR2    | 3455 interferon (IFN-R IFN-   | 21 NaturalKiller_Cell_Cytotoxicity |
| TNFSF10   | 8743 TNF super(APO2L Apo      | 3 NaturalKiller_Cell_Cytotoxicity  |
| TNFRSF10I | 8793 TNF recept(CD264 DCI     | 8 NaturalKiller_Cell_Cytotoxicity  |
| TNFRSF10C | 8794 TNF recept(CD263 DCI     | 8 NaturalKiller_Cell_Cytotoxicity  |
| TNFRSF10F | 8795 TNF recept(CD262 DR      | 8 NaturalKiller_Cell_Cytotoxicity  |
| TNFRSF10J | 8797 TNF recept(APO2 CD2      | 8 NaturalKiller_Cell_Cytotoxicity  |
| FASLG     | 356 Fas ligand (ALPS1B AP     | 1 NaturalKiller_Cell_Cytotoxicity  |
| FAS       | 355 Fas cell sur(ALPS1A AF    | 10 NaturalKiller_Cell_Cytotoxicity |
| GZMB      | 3002 granzyme C11 CCPI C      | 14 NaturalKiller_Cell_Cytotoxicity |
| PRF1      | 5551 perforin 1 (HPLH2 P1     | 10 NaturalKiller_Cell_Cytotoxicity |
| CASP3     | 836 caspase 3 (CPP32 CPF      | 4 NaturalKiller_Cell_Cytotoxicity  |
| BID       | 637 BH3 intera(FP497          | 22 NaturalKiller_Cell_Cytotoxicity |
| CD3D      | 915 CD3d molec(CD3-DELT       | 11 TCRsignalingPathway             |
| CD3E      | 916 CD3e molec(IMD18 T3E      | 11 TCRsignalingPathway             |
| CD3G      | 917 CD3g molec(CD3-GAM        | 11 TCRsignalingPathway             |
| CD247     | 919 CD247 mo(CD3-ZETA         | 1 TCRsignalingPathway              |
| CD4       | 920 CD4 molec(CD4mut          | 12 TCRsignalingPathway             |
| CD8A      | 925 CD8a molec(CD8 Leu2       | 2 TCRsignalingPathway              |
| CD8B      | 926 CD8b molec(CD8B1 LEL      | 2 TCRsignalingPathway              |
| PTPRC     | 5788 protein tyr(B220 CD45    | 1 TCRsignalingPathway              |
| LCK       | 3932 LCK proto-IMD22 LSK      | 1 TCRsignalingPathway              |
| FYN       | 2534 FYN proto-SLK SYN p      | 6 TCRsignalingPathway              |
| ZAP70     | 7535 zeta chain (ADMIO2 IM    | 2 TCRsignalingPathway              |
| LCP2      | 3937 lymphocy(SLP-76 SLF      | 5 TCRsignalingPathway              |
| LAT       | 27040 linker for a IMD52 LAT  | 16 TCRsignalingPathway             |
| ITK       | 3702 IL2 inducib(EMT LPFS1    | 5 TCRsignalingPathway              |
| TEC       | 7006 tec protein(PSCTK4       | 4 TCRsignalingPathway              |
| NCK1      | 4690 NCK adapt(NCK NCKa       | 3 TCRsignalingPathway              |
| NCK2      | 8440 NCK adapt(GRB4 NCK       | 2 TCRsignalingPathway              |
| VAV3      | 10451 vav guanin -            | 1 TCRsignalingPathway              |
| VAV1      | 7409 vav guanin(VAV           | 19 TCRsignalingPathway             |
| VAV2      | 7410 vav guanin(VAV-2         | 9 TCRsignalingPathway              |
| GRAP2     | 9402 GRB2 relat(GADS GRA      | 22 TCRsignalingPathway             |
| GRB2      | 2885 growth fac(ASH EGFRE     | 17 TCRsignalingPathway             |
| PAK1      | 5058 p21 (RAC1 DDMSSD I       | 11 TCRsignalingPathway             |
| PAK2      | 5062 p21 (RAC1 PAK65 PA       | 3 TCRsignalingPathway              |
| PAK3      | 5063 p21 (RAC1 ARA MRX3X      | TCRsignalingPathway                |
| PAK4      | 10298 p21 (RAC1 -             | 19 TCRsignalingPathway             |
| PAK6      | 56924 p21 (RAC1 PAK5          | 15 TCRsignalingPathway             |
| PAK5      | 57144 p21 (RAC1 PAK7          | 20 TCRsignalingPathway             |
| RHOA      | 387 ras homolc(ARH12 ARI      | 3 TCRsignalingPathway              |

|         |                              |                        |
|---------|------------------------------|------------------------|
| CDC42   | 998 cell division CDC42Hs C  | 1 TCRsignalingPathway  |
| PPP3CA  | 5530 protein phACCIID CA     | 4 TCRsignalingPathway  |
| PPP3CB  | 5532 protein phCALNA2 C      | 10 TCRsignalingPathway |
| PPP3CC  | 5533 protein phCALNA3 C      | 8 TCRsignalingPathway  |
| CHP1    | 11261 calcineurin CHP SLC9A  | 15 TCRsignalingPathway |
| PPP3R1  | 5534 protein phCALNB1 CI     | 2 TCRsignalingPathway  |
| PPP3R2  | 5535 protein phPPP3RL        | 9 TCRsignalingPathway  |
| CHP2    | 63928 calcineurin -          | 16 TCRsignalingPathway |
| NFAT5   | 10725 nuclear facNF-AT5 NF   | 16 TCRsignalingPathway |
| NFATC1  | 4772 nuclear facNF-ATC NI    | 18 TCRsignalingPathway |
| NFATC2  | 4773 nuclear facNFAT1 NF     | 20 TCRsignalingPathway |
| NFATC3  | 4775 nuclear facNF-AT4c N    | 16 TCRsignalingPathway |
| NFATC4  | 4776 nuclear facNF-AT3 NF    | 14 TCRsignalingPathway |
| SOS1    | 6654 SOS Ras/R.GF1 GGF1      | 2 TCRsignalingPathway  |
| SOS2    | 6655 SOS Ras/RINS9 SOS-2     | 14 TCRsignalingPathway |
| HRAS    | 3265 HRas protcC-BAS/HA      | 11 TCRsignalingPathway |
| KRAS    | 3845 KRAS protcC-K-RAS C     | 12 TCRsignalingPathway |
| NRAS    | 4893 NRAS protALPS4 CMI      | 1 TCRsignalingPathway  |
| FOS     | 2353 Fos proto- AP-1 C-FC    | 14 TCRsignalingPathway |
| JUN     | 3725 Jun proto- AP-1 AP1 C   | 1 TCRsignalingPathway  |
| CARD11  | 84433 caspase reBENTA BIN    | 7 TCRsignalingPathway  |
| BCL10   | 8915 BCL10 immrCARMEN C      | 1 TCRsignalingPathway  |
| MALT1   | 10892 MALT1 parIMD12 ML      | 18 TCRsignalingPathway |
| CHUK    | 1147 componenIKBA IKK-       | 10 TCRsignalingPathway |
| IKBKB   | 3551 inhibitor ofIKK-beta Ik | 8 TCRsignalingPathway  |
| IKBKG   | 8517 inhibitor ofAMCBX1 EX   | TCRsignalingPathway    |
| NFKB1   | 4790 nuclear facCVID12 EB    | 4 TCRsignalingPathway  |
| RELA    | 5970 RELA protcCMCU NFk      | 11 TCRsignalingPathway |
| NFKBIA  | 4792 NFKB inhibEDAID2 IKK    | 14 TCRsignalingPathway |
| NFKBIB  | 4793 NFKB inhibIKBB TRIP9    | 19 TCRsignalingPathway |
| NFKBIE  | 4794 NFKB inhibIKBE          | 6 TCRsignalingPathway  |
| CD28    | 940 CD28 moleTp44            | 2 TCRsignalingPathway  |
| ICOS    | 29851 inducible TAILIM CD2   | 2 TCRsignalingPathway  |
| CD40LG  | 959 CD40 ligandCD154 CD4X    | TCRsignalingPathway    |
| PIK3R5  | 23533 phosphoinF7300381      | 17 TCRsignalingPathway |
| PIK3R1  | 5295 phosphoinAGM7 GRE       | 5 TCRsignalingPathway  |
| PIK3R2  | 5296 phosphoinMPPH MPF       | 19 TCRsignalingPathway |
| PIK3R3  | 8503 phosphoinp55 p55-G      | 1 TCRsignalingPathway  |
| PIK3CA  | 5290 phosphaticCLAPO CLC     | 3 TCRsignalingPathway  |
| PIK3CB  | 5291 phosphaticP110BETA      | 3 TCRsignalingPathway  |
| PIK3CD  | 5293 phosphaticAPDS IMD      | 1 TCRsignalingPathway  |
| PIK3CG  | 5294 phosphaticPI3CG PI3k    | 7 TCRsignalingPathway  |
| AKT3    | 10000 AKT serine.MPPH MPF    | 1 TCRsignalingPathway  |
| AKT1    | 207 AKT serine.AKT CWS6      | 14 TCRsignalingPathway |
| AKT2    | 208 AKT serine.HIHGHH P      | 19 TCRsignalingPathway |
| MAP3K8  | 1326 mitogen-aAURA2 CO       | 10 TCRsignalingPathway |
| MAP3K14 | 9020 mitogen-aFTDCR1B F      | 17 TCRsignalingPathway |
| PDCD1   | 5133 programmCD279 PD-       | 2 TCRsignalingPathway  |
| CTLA4   | 1493 cytotoxic TALPS5 CD     | 2 TCRsignalingPathway  |
| PTPN6   | 5777 protein tyr.HCP HCPH    | 12 TCRsignalingPathway |
| CBL     | 23624 Cbl proto- CBL-3 CBL   | 19 TCRsignalingPathway |
| CBL     | 867 Cbl proto- C-CBL CBL     | 11 TCRsignalingPathway |
| CBLB    | 868 Cbl proto- Cbl-b Nbl     | 3 TCRsignalingPathway  |
| IL2     | 3558 interleukin IL-2 TCGF   | 4 TCRsignalingPathway  |
| IL4     | 3565 interleukin BCGF-1 BC   | 5 TCRsignalingPathway  |
| IL5     | 3567 interleukin EDF IL-5 TI | 5 TCRsignalingPathway  |
| IL10    | 3586 interleukin CSIF GVHC   | 1 TCRsignalingPathway  |
| IFNG    | 3458 interferon IFG IFI      | 12 TCRsignalingPathway |

|         |                             |                        |
|---------|-----------------------------|------------------------|
| CSF2    | 1437 colony stimCSF GMCS    | 5 TCRsignalingPathway  |
| TNF     | 7124 tumor necrDIF TNF-al   | 6 TCRsignalingPathway  |
| CDK4    | 1019 cyclin depεCMM3 PSk    | 12 TCRsignalingPathway |
| RASGRP1 | 10125 RAS guanyCALDAG-(     | 15 TCRsignalingPathway |
| PDK1    | 5163 pyruvate d -           | 2 TCRsignalingPathway  |
| PLCG1   | 5335 phospholipNCKAP3 PI    | 20 TCRsignalingPathway |
| PRKCQ   | 5588 protein kinPRKCT nPk   | 10 TCRsignalingPathway |
| TRAC    | 28755 T cell recepIMD7 TCR/ | 14 TCRsignalingPathway |
| TRAJ1   | 28754 T cell recep -        | 14 TCRsignalingPathway |
| TRAJ2   | 28753 T cell recep -        | 14 TCRsignalingPathway |
| TRAJ3   | 28752 T cell recep -        | 14 TCRsignalingPathway |
| TRAJ4   | 28751 T cell recep -        | 14 TCRsignalingPathway |
| TRAJ5   | 28750 T cell recep -        | 14 TCRsignalingPathway |
| TRAJ6   | 28749 T cell recep -        | 14 TCRsignalingPathway |
| TRAJ7   | 28748 T cell recep -        | 14 TCRsignalingPathway |
| TRAJ8   | 28747 T cell recep -        | 14 TCRsignalingPathway |
| TRAJ9   | 28746 T cell recep -        | 14 TCRsignalingPathway |
| TRAJ10  | 28745 T cell recep -        | 14 TCRsignalingPathway |
| TRAJ11  | 28744 T cell recep -        | 14 TCRsignalingPathway |
| TRAJ12  | 28743 T cell recep -        | 14 TCRsignalingPathway |
| TRAJ13  | 28742 T cell recep -        | 14 TCRsignalingPathway |
| TRAJ14  | 28741 T cell recep -        | 14 TCRsignalingPathway |
| TRAJ15  | 28740 T cell recep -        | 14 TCRsignalingPathway |
| TRAJ16  | 28739 T cell recep -        | 14 TCRsignalingPathway |
| TRAJ17  | 28738 T cell recep -        | 14 TCRsignalingPathway |
| TRAJ18  | 28737 T cell recep -        | 14 TCRsignalingPathway |
| TRAJ19  | 28736 T cell recep -        | 14 TCRsignalingPathway |
| TRAJ20  | 28735 T cell recep -        | 14 TCRsignalingPathway |
| TRAJ21  | 28734 T cell recep -        | 14 TCRsignalingPathway |
| TRAJ22  | 28733 T cell recep -        | 14 TCRsignalingPathway |
| TRAJ23  | 28732 T cell recep -        | 14 TCRsignalingPathway |
| TRAJ24  | 28731 T cell recep -        | 14 TCRsignalingPathway |
| TRAJ25  | 28730 T cell recep -        | 14 TCRsignalingPathway |
| TRAJ26  | 28729 T cell recep -        | 14 TCRsignalingPathway |
| TRAJ27  | 28728 T cell recep -        | 14 TCRsignalingPathway |
| TRAJ28  | 28727 T cell recep -        | 14 TCRsignalingPathway |
| TRAJ29  | 28726 T cell recep -        | 14 TCRsignalingPathway |
| TRAJ30  | 28725 T cell recep -        | 14 TCRsignalingPathway |
| TRAJ31  | 28724 T cell recep -        | 14 TCRsignalingPathway |
| TRAJ32  | 28723 T cell recep -        | 14 TCRsignalingPathway |
| TRAJ33  | 28722 T cell recep -        | 14 TCRsignalingPathway |
| TRAJ34  | 28721 T cell recep -        | 14 TCRsignalingPathway |
| TRAJ35  | 28720 T cell recep -        | 14 TCRsignalingPathway |
| TRAJ36  | 28719 T cell recep -        | 14 TCRsignalingPathway |
| TRAJ37  | 28718 T cell recep -        | 14 TCRsignalingPathway |
| TRAJ38  | 28717 T cell recep -        | 14 TCRsignalingPathway |
| TRAJ39  | 28716 T cell recep -        | 14 TCRsignalingPathway |
| TRAJ40  | 28715 T cell recep -        | 14 TCRsignalingPathway |
| TRAJ41  | 28714 T cell recep -        | 14 TCRsignalingPathway |
| TRAJ42  | 28713 T cell recep -        | 14 TCRsignalingPathway |
| TRAJ43  | 28712 T cell recep -        | 14 TCRsignalingPathway |
| TRAJ44  | 28711 T cell recep -        | 14 TCRsignalingPathway |
| TRAJ45  | 28710 T cell recep -        | 14 TCRsignalingPathway |
| TRAJ46  | 28709 T cell recep -        | 14 TCRsignalingPathway |
| TRAJ47  | 28708 T cell recep -        | 14 TCRsignalingPathway |
| TRAJ48  | 28707 T cell recep -        | 14 TCRsignalingPathway |
| TRAJ49  | 28706 T cell recep -        | 14 TCRsignalingPathway |
| TRAJ50  | 28705 T cell recep -        | 14 TCRsignalingPathway |

|           |                              |                        |
|-----------|------------------------------|------------------------|
| TRAJ52    | 28703 T cell recep           | 14 TCRsignalingPathway |
| TRAJ53    | 28702 T cell recep           | 14 TCRsignalingPathway |
| TRAJ54    | 28701 T cell recep           | 14 TCRsignalingPathway |
| TRAJ56    | 28699 T cell recep           | 14 TCRsignalingPathway |
| TRAJ57    | 28698 T cell recep           | 14 TCRsignalingPathway |
| TRAJ58    | 28697 T cell recep           | 14 TCRsignalingPathway |
| TRAJ59    | 28696 T cell recep           | 14 TCRsignalingPathway |
| TRAJ61    | 28694 T cell recep           | 14 TCRsignalingPathway |
| TRAV1-1   | 28693 T cell recepTCRAV1S1   | 14 TCRsignalingPathway |
| TRAV1-2   | 28692 T cell recepTCRAV1S2   | 14 TCRsignalingPathway |
| TRAV2     | 28691 T cell recepTCRAV11S   | 14 TCRsignalingPathway |
| TRAV3     | 28690 T cell recepTCRAV16S   | 14 TCRsignalingPathway |
| TRAV4     | 28689 T cell recepTCRAV20S   | 14 TCRsignalingPathway |
| TRAV5     | 28688 T cell recepTCRAV15S   | 14 TCRsignalingPathway |
| TRAV7     | 28686 T cell recepTCRAV7S1   | 14 TCRsignalingPathway |
| TRAV8-1   | 28685 T cell recepTCRAV1S1   | 14 TCRsignalingPathway |
| TRAV8-2   | 28684 T cell recepTCRAV1S5   | 14 TCRsignalingPathway |
| TRAV8-3   | 28683 T cell recepTCRAV1S4   | 14 TCRsignalingPathway |
| TRAV8-4   | 28682 T cell recepTCRAV1S2   | 14 TCRsignalingPathway |
| TRAV8-6   | 28680 T cell recepTCRAV1S3   | 14 TCRsignalingPathway |
| TRAV8-7   | 28679 T cell recepTCRAV8S7   | 14 TCRsignalingPathway |
| TRAV9-1   | 28678 T cell recepTCRAV9S1   | 14 TCRsignalingPathway |
| TRAV9-2   | 28677 T cell recepTCRAV22S   | 14 TCRsignalingPathway |
| TRAV10    | 28676 T cell recepTCRAV10S   | 14 TCRsignalingPathway |
| TRAV12-1  | 28674 T cell recepTCRAV12S   | 14 TCRsignalingPathway |
| TRAV12-2  | 28673 T cell recepTCRAV12S   | 14 TCRsignalingPathway |
| TRAV12-3  | 28672 T cell recepTCRAV12S   | 14 TCRsignalingPathway |
| TRAV13-1  | 28671 T cell recepTCRAV13S   | 14 TCRsignalingPathway |
| TRAV13-2  | 28670 T cell recepTCRAV13S   | 14 TCRsignalingPathway |
| TRAV14DV  | 28669 T cell recepTCRAV6S1   | 14 TCRsignalingPathway |
| TRAV16    | 28667 T cell recepTCRAV16S   | 14 TCRsignalingPathway |
| TRAV17    | 28666 T cell recepTCRAV17S   | 14 TCRsignalingPathway |
| TRAV18    | 28665 T cell recepTCRAV18S   | 14 TCRsignalingPathway |
| TRAV19    | 28664 T cell recepTCRAV12S   | 14 TCRsignalingPathway |
| TRAV20    | 28663 T cell recepTCRAV20S   | 14 TCRsignalingPathway |
| TRAV21    | 28662 T cell recepTCRAV21S   | 14 TCRsignalingPathway |
| TRAV22    | 28661 T cell recepTCRAV13S   | 14 TCRsignalingPathway |
| TRAV23DV  | 28660 T cell recepTCRAV17S   | 14 TCRsignalingPathway |
| TRAV24    | 28659 T cell recepTCRAV18S   | 14 TCRsignalingPathway |
| TRAV25    | 28658 T cell recepTCRAV25S   | 14 TCRsignalingPathway |
| TRAV26-1  | 28657 T cell recepTCRAV26S   | 14 TCRsignalingPathway |
| TRAV26-2  | 28656 T cell recepTCRAV26S   | 14 TCRsignalingPathway |
| TRAV27    | 28655 T cell recepTCRAV10S   | 14 TCRsignalingPathway |
| TRAV29DV  | 28653 T cell recepTCRAVTCR/  | 14 TCRsignalingPathway |
| TRAV30    | 28652 T cell recepTCRAV29S   | 14 TCRsignalingPathway |
| TRAV34    | 28648 T cell recepTCRAV26S   | 14 TCRsignalingPathway |
| TRAV35    | 28647 T cell recepTCRAV25S   | 14 TCRsignalingPathway |
| TRAV36DV  | 28646 T cell recepTCRAV28S   | 14 TCRsignalingPathway |
| TRAV38-1  | 28644 T cell recepTCRAV14S   | 14 TCRsignalingPathway |
| TRAV38-2I | 28643 T cell recepTCRAV14S   | 14 TCRsignalingPathway |
| TRAV39    | 28642 T cell recepTCRAV27S   | 14 TCRsignalingPathway |
| TRAV40    | 28641 T cell recepTCRAV31S   | 14 TCRsignalingPathway |
| TRAV41    | 28640 T cell recepTCRAV19S   | 14 TCRsignalingPathway |
| TRBC1     | 28639 T cell recepBV05S1J2.2 | 7 TCRsignalingPathway  |
| TRBC2     | 28638 T cell recepTCRBC2     | 7 TCRsignalingPathway  |
| TRBD1     | 28637 T cell recepTCRBD1     | 7 TCRsignalingPathway  |
| TRBD2     | 28636 T cell recepTCRBD2     | 7 TCRsignalingPathway  |
| TRBJ1-1   | 28635 T cell recepTCRBJ1S1I  | 7 TCRsignalingPathway  |



|          |                   |            |                       |
|----------|-------------------|------------|-----------------------|
| TRBJ1-2  | 28634 T cell rece | TCRBJ1S2]  | 7 TCRsignalingPathway |
| TRBJ1-3  | 28633 T cell rece | TCRBJ1S3]  | 7 TCRsignalingPathway |
| TRBJ1-4  | 28632 T cell rece | TCRBJ1S4]  | 7 TCRsignalingPathway |
| TRBJ1-5  | 28631 T cell rece | TCRBJ1S5]  | 7 TCRsignalingPathway |
| TRBJ1-6  | 28630 T cell rece | TCRBJ1S6]  | 7 TCRsignalingPathway |
| TRBJ2-1  | 28629 T cell rece | TCRBJ2S1]  | 7 TCRsignalingPathway |
| TRBJ2-2  | 28628 T cell rece | TCRBJ2S2]  | 7 TCRsignalingPathway |
| TRBJ2-3  | 28626 T cell rece | TCRBJ2S3]  | 7 TCRsignalingPathway |
| TRBJ2-4  | 28625 T cell rece | TCRBJ2S4]  | 7 TCRsignalingPathway |
| TRBJ2-5  | 28624 T cell rece | TCRBJ2S5]  | 7 TCRsignalingPathway |
| TRBJ2-6  | 28623 T cell rece | TCRBJ2S6]  | 7 TCRsignalingPathway |
| TRBJ2-7  | 28622 T cell rece | TCRBJ2S7]  | 7 TCRsignalingPathway |
| TRBV2    | 28620 T cell rece | TCRBV2S:   | 7 TCRsignalingPathway |
| TRBV3-1  | 28619 T cell rece | TCRBV3S1]  | 7 TCRsignalingPathway |
| TRBV4-1  | 28617 T cell rece | BV07S1J2.7 | 7 TCRsignalingPathway |
| TRBV4-2  | 28616 T cell rece | TCRBV4S2]  | 7 TCRsignalingPathway |
| TRBV4-3  | 28615 T cell rece | TCRBV4S3]  | 7 TCRsignalingPathway |
| TRBV5-1  | 28614 T cell rece | TCRBV5S1]  | 7 TCRsignalingPathway |
| TRBV5-4  | 28611 T cell rece | TCRBV5S4]  | 7 TCRsignalingPathway |
| TRBV5-5  | 28610 T cell rece | TCRBV5S3,  | 7 TCRsignalingPathway |
| TRBV5-6  | 28609 T cell rece | TCRBV5S2]  | 7 TCRsignalingPathway |
| TRBV5-7  | 28608 T cell rece | TCRBV5S7]  | 7 TCRsignalingPathway |
| TRBV5-8  | 28607 T cell rece | TCRBV5S4,  | 7 TCRsignalingPathway |
| TRBV6-1  | 28606 T cell rece | TCRBV13S:  | 7 TCRsignalingPathway |
| TRBV6-2  | 28605 T cell rece | TCRBV13S:  | 7 TCRsignalingPathway |
| TRBV6-3  | 28604 T cell rece | TCRBV13S:  | 7 TCRsignalingPathway |
| TRBV6-4  | 28603 T cell rece | TCRBV13S:  | 7 TCRsignalingPathway |
| TRBV6-5  | 28602 T cell rece | TCRBV13S:  | 7 TCRsignalingPathway |
| TRBV6-6  | 28601 T cell rece | TCRBV13S:  | 7 TCRsignalingPathway |
| TRBV6-7  | 28600 T cell rece | TCRBV13S:  | 7 TCRsignalingPathway |
| TRBV6-8  | 28599 T cell rece | TCRBV13S:  | 7 TCRsignalingPathway |
| TRBV6-9  | 28598 T cell rece | TCRBV13S:  | 7 TCRsignalingPathway |
| TRBV7-2  | 28596 T cell rece | TCRBV6S5,  | 7 TCRsignalingPathway |
| TRBV7-3  | 28595 T cell rece | TCRBV6S1,  | 7 TCRsignalingPathway |
| TRBV7-4  | 28594 T cell rece | TCRBV6S8,  | 7 TCRsignalingPathway |
| TRBV7-6  | 28592 T cell rece | TCRBV6S3,  | 7 TCRsignalingPathway |
| TRBV7-7  | 28591 T cell rece | TCRBV6S6,  | 7 TCRsignalingPathway |
| TRBV7-8  | 28590 T cell rece | TCRBV6S2,  | 7 TCRsignalingPathway |
| TRBV7-9  | 28589 T cell rece | TCRB TCRE  | 7 TCRsignalingPathway |
| TRBV9    | 28586 T cell rece | TCRBV1S1,  | 7 TCRsignalingPathway |
| TRBV10-1 | 28585 T cell rece | TCRBV10S:  | 7 TCRsignalingPathway |
| TRBV10-2 | 28584 T cell rece | TCRBV10S:  | 7 TCRsignalingPathway |
| TRBV10-3 | 28583 T cell rece | TCRBV10S:  | 7 TCRsignalingPathway |
| TRBV11-1 | 28582 T cell rece | TCRBV11S:  | 7 TCRsignalingPathway |
| TRBV11-2 | 28581 T cell rece | TCRBV11S:  | 7 TCRsignalingPathway |
| TRBV11-3 | 28580 T cell rece | TCRBV11S:  | 7 TCRsignalingPathway |
| TRBV12-3 | 28577 T cell rece | TCRBV12S:  | 7 TCRsignalingPathway |
| TRBV12-4 | 28576 T cell rece | TCRBV12S:  | 7 TCRsignalingPathway |
| TRBV12-5 | 28575 T cell rece | TCRBV12S:  | 7 TCRsignalingPathway |
| TRBV13   | 28574 T cell rece | TCRBV13S:  | 7 TCRsignalingPathway |
| TRBV14   | 28573 T cell rece | TCRBV14S:  | 7 TCRsignalingPathway |
| TRBV15   | 28572 T cell rece | TCRBV15S:  | 7 TCRsignalingPathway |
| TRBV16   | 28571 T cell rece | BV25S1J1.2 | 7 TCRsignalingPathway |
| TRBV17   | 28570 T cell rece | TCRBV17S:  | 7 TCRsignalingPathway |
| TRBV18   | 28569 T cell rece | TCRBV18S:  | 7 TCRsignalingPathway |
| TRBV19   | 28568 T cell rece | TCRBV17S:  | 7 TCRsignalingPathway |
| TRBV20-1 | 28567 T cell rece | TCRBV20S:  | 7 TCRsignalingPathway |
| TRBV24-1 | 28563 T cell rece | TCRBV15S:  | 7 TCRsignalingPathway |

|          |                                                       |                        |
|----------|-------------------------------------------------------|------------------------|
| TRBV25-1 | 28562 T cell receptorTCRBV11S:                        | 7 TCRsignalingPathway  |
| TRBV27   | 28560 T cell receptorTCRBV14S:                        | 7 TCRsignalingPathway  |
| TRBV28   | 28559 T cell receptorTCRBV28S:                        | 7 TCRsignalingPathway  |
| TRBV29-1 | 28558 T cell receptorTCRBV29S:                        | 7 TCRsignalingPathway  |
| TRBV30   | 28557 T cell receptorTCRBV20S:                        | 7 TCRsignalingPathway  |
| TRDC     | 28526 T cell receptorTCRD                             | 14 TCRsignalingPathway |
| TRDD1    | 28525 T cell receptor-                                | 14 TCRsignalingPathway |
| TRDD2    | 28524 T cell receptor-                                | 14 TCRsignalingPathway |
| TRDD3    | 28523 T cell receptorTCRD                             | 14 TCRsignalingPathway |
| TRDJ1    | 28522 T cell receptorTCRD                             | 14 TCRsignalingPathway |
| TRDJ2    | 28521 T cell receptor-                                | 14 TCRsignalingPathway |
| TRDJ3    | 28520 T cell receptor-                                | 14 TCRsignalingPathway |
| TRDJ4    | 28519 T cell receptor-                                | 14 TCRsignalingPathway |
| TRDV1    | 28518 T cell receptorhDV101S1                         | 14 TCRsignalingPathway |
| TRDV2    | 28517 T cell receptorhDV102S1                         | 14 TCRsignalingPathway |
| TRDV3    | 28516 T cell receptorhDV103S1                         | 14 TCRsignalingPathway |
| TRGV9    | 6983 T cell receptorTCRGV9 TF                         | 7 TCRsignalingPathway  |
| TRGV8    | 6982 T cell receptorTCRGV8 V:                         | 7 TCRsignalingPathway  |
| TRGV5    | 6978 T cell receptorTCRGV5 V:                         | 7 TCRsignalingPathway  |
| TRGV4    | 6977 T cell receptorTCRGV4 V:                         | 7 TCRsignalingPathway  |
| TRGV3    | 6976 T cell receptorTCRGV3 V:                         | 7 TCRsignalingPathway  |
| TRGV2    | 6974 T cell receptorTCRGV2 V:                         | 7 TCRsignalingPathway  |
| TRGJP2   | 6972 T cell receptorJP2 TCRGJ                         | 7 TCRsignalingPathway  |
| TRGJP1   | 6971 T cell receptorJP1 TCRGJ                         | 7 TCRsignalingPathway  |
| TRGJP    | 6970 T cell receptorJP TCRGJP                         | 7 TCRsignalingPathway  |
| TRGJ2    | 6969 T cell receptorJ2 TCRGJ2                         | 7 TCRsignalingPathway  |
| TRGJ1    | 6968 T cell receptorJ1 TCRGJ1                         | 7 TCRsignalingPathway  |
| TRGC2    | 6967 T cell receptorTCRGC2 TF                         | 7 TCRsignalingPathway  |
| TRGC1    | 6966 T cell receptorC1 TCRG T                         | 7 TCRsignalingPathway  |
| TRAV6    | 6956 T cell receptorTCRAV5S1                          | 14 TCRsignalingPathway |
| BMP1     | 649 bone morphogenetic protein13 PCOL                 | 8 TGFb_Family_Member   |
| BMP10    | 27302 bone morphogenetic protein-                     | 2 TGFb_Family_Member   |
| BMP15    | 9210 bone morphogenetic proteinGDF9B ODX              | TGFb_Family_Member     |
| BMP2     | 650 bone morphogenetic proteinBDA2 BMP                | 20 TGFb_Family_Member  |
| BMP3     | 651 bone morphogenetic proteinBMP-3A                  | 4 TGFb_Family_Member   |
| BMP4     | 652 bone morphogenetic proteinBMP2B BM                | 14 TGFb_Family_Member  |
| BMP5     | 653 bone morphogenetic protein-                       | 6 TGFb_Family_Member   |
| BMP6     | 654 bone morphogenetic proteinVGR VGR1                | 6 TGFb_Family_Member   |
| BMP7     | 655 bone morphogenetic proteinOP-1                    | 20 TGFb_Family_Member  |
| BMP8A    | 353500 bone morphogenetic proteinOP-2                 | 1 TGFb_Family_Member   |
| BMP8B    | 656 bone morphogenetic proteinBMP8 OP2                | 1 TGFb_Family_Member   |
| GDF1     | 2657 growth differentiation factorCERS1 CH1           | 19 TGFb_Family_Member  |
| GDF10    | 2662 growth differentiation factorBIP BMP-3           | 10 TGFb_Family_Member  |
| GDF11    | 10220 growth differentiation factorBMP-11 BM          | 12 TGFb_Family_Member  |
| GDF15    | 9518 growth differentiation factorGDF-15 M            | 19 TGFb_Family_Member  |
| GDF2     | 2658 growth differentiation factorBMP-9 BM            | 10 TGFb_Family_Member  |
| GDF3     | 9573 growth differentiation factorKFS3 MCO            | 12 TGFb_Family_Member  |
| GDF5     | 8200 growth differentiation factorBDA1C BM            | 20 TGFb_Family_Member  |
| GDF6     | 392255 growth differentiation factorBMP-13 BM         | 8 TGFb_Family_Member   |
| GDF7     | 151449 growth differentiation factorBMP12             | 2 TGFb_Family_Member   |
| GDF9     | 2661 growth differentiation factorPOF14               | 5 TGFb_Family_Member   |
| GNDF     | 2668 glial cell derived neurotrophic factorATF ATF1 / | 5 TGFb_Family_Member   |
| INHA     | 3623 inhibin subunit-                                 | 2 TGFb_Family_Member   |
| INHBA    | 3624 inhibin subunitEDF FRP                           | 7 TGFb_Family_Member   |
| INHBB    | 3625 inhibin subunit-                                 | 2 TGFb_Family_Member   |
| INHBC    | 3626 inhibin subunitIHBC                              | 12 TGFb_Family_Member  |
| INHBE    | 83729 inhibin subunit-                                | 12 TGFb_Family_Member  |
| LEFTY1   | 10637 left-right development factorLEFTB LEFT         | 1 TGFb_Family_Member   |

|           |                              |                                 |
|-----------|------------------------------|---------------------------------|
| LEFTY2    | 7044 left-right dEBAF LEFT/  | 1 TGFb_Family_Member            |
| NODAL     | 4838 nodal grovHTX5          | 10 TGFb_Family_Member           |
| TGFB1     | 7040 transformirCED DPD1     | 19 TGFb_Family_Member           |
| TGFB2     | 7042 transformirG-TSF LDS    | 1 TGFb_Family_Member            |
| TGFB3     | 7043 transformirARVD ARV     | 14 TGFb_Family_Member           |
| ACVR1B    | 91 activin A reACTRIB AC     | 12 TGFb_Family_Member_Receptor  |
| ACVR1C    | 130399 activin A reACVRLK7 / | 2 TGFb_Family_Member_Receptor   |
| ACVR2A    | 92 activin A reACTRII AC     | 2 TGFb_Family_Member_Receptor   |
| ACVR2B    | 93 activin A reACTRIIB Ac    | 3 TGFb_Family_Member_Receptor   |
| ACVRL1    | 94 activin A reACVRLK1 /     | 12 TGFb_Family_Member_Receptor  |
| AMHR2     | 269 anti-MulleiAMHR MIS      | 12 TGFb_Family_Member_Receptor  |
| BMPR1A    | 657 bone morç10q23del /      | 10 TGFb_Family_Member_Receptor  |
| BMPR1B    | 658 bone morçALK-6 ALK       | 4 TGFb_Family_Member_Receptor   |
| BMPR2     | 659 bone morçBMPR-II BI      | 2 TGFb_Family_Member_Receptor   |
| TGFR1     | 7046 transformirAAT5 ACVI    | 9 TGFb_Family_Member_Receptor   |
| TGFR2     | 7048 transformirAAT3 FAA3    | 3 TGFb_Family_Member_Receptor   |
| TGFR3     | 7049 transformirBGCAN be     | 1 TGFb_Family_Member_Receptor   |
| TNFRSF11f | 4982 TNF receptOCIF OPG      | 8 TNF_Family_Members            |
| TNFRSF10  | 8743 TNF super APO2L Apo     | 3 TNF_Family_Members            |
| TNFRSF11  | 8600 TNF super CD254 OD      | 13 TNF_Family_Members           |
| TNFRSF12  | 8742 TNF super APO3L DR3     | 17 TNF_Family_Members           |
| TNFRSF13  | 8741 TNF super APRIL CD2     | 17 TNF_Family_Members           |
| TNFRSF13B | 10673 TNF super BAFF BLYS    | 13 TNF_Family_Members           |
| TNFRSF14  | 8740 TNF super CD258 HVI     | 19 TNF_Family_Members           |
| TNFRSF15  | 9966 TNF super TL1 TL1A T    | 9 TNF_Family_Members            |
| TNFRSF18  | 8995 TNF super AITRL GITR    | 1 TNF_Family_Members            |
| TNFRSF4   | 7292 TNF super CD134L CE     | 1 TNF_Family_Members            |
| TNFRSF8   | 944 TNF super CD153 CD3      | 9 TNF_Family_Members            |
| TNFRSF9   | 8744 TNF super 4-1BB-L C     | 19 TNF_Family_Members           |
| TNFRSF10f | 8795 TNF receptCD262 DR5     | 8 TNF_Family_Members_Receptors  |
| TNFRSF10c | 8794 TNF receptCD263 DCI     | 8 TNF_Family_Members_Receptors  |
| TNFRSF10i | 8793 TNF receptCD264 DCI     | 8 TNF_Family_Members_Receptors  |
| TNFRSF11/ | 8792 TNF receptCD265 FEC     | 18 TNF_Family_Members_Receptors |
| TNFRSF12/ | 51330 TNF receptCD266 FN1    | 16 TNF_Family_Members_Receptors |
| TNFRSF13f | 23495 TNF receptCD267 CVI    | 17 TNF_Family_Members_Receptors |
| TNFRSF13c | 115650 TNF receptBAFF-R BA   | 22 TNF_Family_Members_Receptors |
| TNFRSF14  | 8764 TNF receptATAR CD27     | 1 TNF_Family_Members_Receptors  |
| TNFRSF17  | 608 TNF receptBCM BCM/       | 16 TNF_Family_Members_Receptors |
| TNFRSF18  | 8784 TNF receptAITR CD35     | 1 TNF_Family_Members_Receptors  |
| TNFRSF19  | 55504 TNF receptTAJ TAJ-al   | 13 TNF_Family_Members_Receptors |
| TNFRSF1A  | 7132 TNF receptCD120a FP     | 12 TNF_Family_Members_Receptors |
| TNFRSF1B  | 7133 TNF receptCD120b TE     | 1 TNF_Family_Members_Receptors  |
| TNFRSF21  | 27242 TNF receptBM-018 CI    | 6 TNF_Family_Members_Receptors  |
| TNFRSF25  | 8718 TNF receptAPO-3 DD      | 1 TNF_Family_Members_Receptors  |
| TNFRSF4   | 7293 TNF receptACT35 CD3     | 1 TNF_Family_Members_Receptors  |
| TNFRSF6B  | 8771 TNF receptDCR3 DJ58     | 20 TNF_Family_Members_Receptors |
| TNFRSF8   | 943 TNF receptCD30 D1S1      | 1 TNF_Family_Members_Receptors  |
| TNFRSF9   | 3604 TNF recept4-1BB CD1     | 1 TNF_Family_Members_Receptors  |
