# Supplementary material for: The Potential Diagnostic Value of Immune-Related Genes in Interstitial Fibrosis and Tubular Atrophy after Kidney Transplantation
Source: Hindawi journal article supplement (doi:10.1155/2022/7212852), 2022-06-17
Supplement: f1 [file 7212852.f1.zip]

| ID       | Description                                 | setSize | enrichment | NES      | pvalue   | p.adjust | qvalues  | rank |
|----------|---------------------------------------------|---------|------------|----------|----------|----------|----------|------|
| hsa01240 | Biosynthesis of amino acids                 | 142     | 0.618439   | 2.889374 | 0.001433 | 0.009559 | 0.004224 | 2731 |
| hsa01200 | Carbon metabolism                           | 110     | 0.613343   | 2.755941 | 0.001484 | 0.009559 | 0.004224 | 2369 |
| hsa00190 | Oxidative phosphorylation                   | 98      | 0.582297   | 2.564267 | 0.001515 | 0.009559 | 0.004224 | 4286 |
| hsa04146 | Peroxisome                                  | 77      | 0.660703   | 2.769133 | 0.00155  | 0.009559 | 0.004224 | 2614 |
| hsa00983 | Drug metabolism - cytochrome P450           | 69      | 0.614971   | 2.517995 | 0.001558 | 0.009559 | 0.004224 | 1053 |
| hsa05204 | Chemical carcinogenesis                     | 69      | 0.62515    | 2.559675 | 0.001558 | 0.009559 | 0.004224 | 1974 |
| hsa04976 | Bile secretion                              | 71      | 0.603031   | 2.484144 | 0.001563 | 0.009559 | 0.004224 | 1608 |
| hsa00071 | Fatty acid metabolism                       | 42      | 0.690356   | 2.554009 | 0.001577 | 0.009559 | 0.004224 | 1458 |
| hsa03320 | PPAR signaling                              | 68      | 0.486715   | 1.982446 | 0.001577 | 0.009559 | 0.004224 | 1953 |
| hsa00310 | Lysine degradation                          | 59      | 0.442005   | 1.762923 | 0.001585 | 0.009559 | 0.004224 | 1454 |
| hsa00270 | Cysteine and methionine metabolism          | 46      | 0.552752   | 2.079402 | 0.00159  | 0.009559 | 0.004224 | 4306 |
| hsa00280 | Valine, leucine and isoleucine degradation  | 46      | 0.777012   | 2.923052 | 0.00159  | 0.009559 | 0.004224 | 1811 |
| hsa00980 | Metabolism of drugs and xenobiotics         | 60      | 0.68006    | 2.714795 | 0.00159  | 0.009559 | 0.004224 | 2091 |
| hsa00140 | Steroid hormone biosynthesis                | 50      | 0.589899   | 2.255535 | 0.001592 | 0.009559 | 0.004224 | 1895 |
| hsa00830 | Retinol metabolism                          | 50      | 0.680946   | 2.603663 | 0.001592 | 0.009559 | 0.004224 | 2555 |
| hsa04978 | Mineral absorption                          | 50      | 0.643913   | 2.462063 | 0.001592 | 0.009559 | 0.004224 | 2227 |
| hsa00010 | Glycolysis / Gluconeogenesis                | 57      | 0.530474   | 2.092994 | 0.001595 | 0.009559 | 0.004224 | 1803 |
| hsa00982 | Drug metabolism - cytochrome P450           | 57      | 0.727868   | 2.871817 | 0.001595 | 0.009559 | 0.004224 | 764  |
| hsa00380 | Tryptophan metabolism                       | 40      | 0.719565   | 2.618659 | 0.001597 | 0.009559 | 0.004224 | 1255 |
| hsa00640 | Propanoate metabolism                       | 30      | 0.7555     | 2.590059 | 0.0016   | 0.009559 | 0.004224 | 1271 |
| hsa01230 | Biosynthesis of nucleosides and nucleotides | 65      | 0.546763   | 2.207659 | 0.001603 | 0.009559 | 0.004224 | 2173 |
| hsa00330 | Arginine and proline metabolism             | 48      | 0.665939   | 2.512357 | 0.001605 | 0.009559 | 0.004224 | 1693 |
| hsa00760 | Nicotinate and nicotinamide metabolism      | 31      | 0.543599   | 1.88529  | 0.001605 | 0.009559 | 0.004224 | 1039 |
| hsa00020 | Citrate cycle (TCA cycle)                   | 29      | 0.689358   | 2.350209 | 0.001608 | 0.009559 | 0.004224 | 3338 |
| hsa00062 | Fatty acid metabolism                       | 25      | 0.579764   | 1.901915 | 0.001608 | 0.009559 | 0.004224 | 3760 |
| hsa00630 | Glyoxylate and glycolate metabolism         | 29      | 0.79552    | 2.712144 | 0.001608 | 0.009559 | 0.004224 | 1255 |
| hsa00620 | Pyruvate metabolism                         | 36      | 0.65353    | 2.323807 | 0.00161  | 0.009559 | 0.004224 | 2615 |
| hsa00053 | Ascorbate and aldehyde metabolism           | 23      | 0.899049   | 2.911575 | 0.001618 | 0.009559 | 0.004224 | 1361 |
| hsa00790 | Folate biosynthesis                         | 23      | 0.662317   | 2.144918 | 0.001618 | 0.009559 | 0.004224 | 1965 |
| hsa00410 | beta-Alanine metabolism                     | 28      | 0.738414   | 2.502502 | 0.001621 | 0.009559 | 0.004224 | 2358 |
| hsa00650 | Butanoate metabolism                        | 24      | 0.783167   | 2.533822 | 0.001621 | 0.009559 | 0.004224 | 2358 |
| hsa00260 | Glycine, serine and alanine metabolism      | 35      | 0.820255   | 2.88183  | 0.001623 | 0.009559 | 0.004224 | 1478 |
| hsa00480 | Glutathione metabolism                      | 53      | 0.560926   | 2.16545  | 0.001623 | 0.009559 | 0.004224 | 2203 |
| hsa00561 | Glycerolipid metabolism                     | 55      | 0.442077   | 1.721743 | 0.001626 | 0.009559 | 0.004224 | 878  |
| hsa01212 | Fatty acid metabolism                       | 55      | 0.540029   | 2.103234 | 0.001626 | 0.009559 | 0.004224 | 3509 |
| hsa00350 | Tyrosine metabolism                         | 33      | 0.650796   | 2.261502 | 0.001629 | 0.009559 | 0.004224 | 1223 |
| hsa00250 | Alanine, aspartate and glutamate metabolism | 34      | 0.648693   | 2.262751 | 0.001631 | 0.009559 | 0.004224 | 1223 |
| hsa00860 | Porphyria and heme biosynthesis             | 34      | 0.671249   | 2.341432 | 0.001631 | 0.009559 | 0.004224 | 1002 |
| hsa00040 | Pentose and glucuronate interconversions    | 26      | 0.818333   | 2.71063  | 0.001634 | 0.009559 | 0.004224 | 1763 |
| hsa04966 | Collecting duct acid secretion              | 27      | 0.668635   | 2.23543  | 0.001642 | 0.009559 | 0.004224 | 4181 |
| hsa00220 | Arginine biosynthesis                       | 20      | 0.687544   | 2.138307 | 0.001664 | 0.009559 | 0.004224 | 2111 |
| hsa00360 | Phenylalanine metabolism                    | 17      | 0.725374   | 2.173129 | 0.001664 | 0.009559 | 0.004224 | 1223 |
| hsa00770 | Pantothenate and CoA biosynthesis           | 20      | 0.733571   | 2.281452 | 0.001664 | 0.009559 | 0.004224 | 825  |
| hsa04964 | Proximal tubule acid secretion              | 20      | 0.734192   | 2.283384 | 0.001664 | 0.009559 | 0.004224 | 2227 |
| hsa04977 | Vitamin D metabolism                        | 20      | 0.6336     | 1.970538 | 0.001664 | 0.009559 | 0.004224 | 2312 |
| hsa00340 | Histidine metabolism                        | 21      | 0.803042   | 2.537354 | 0.001667 | 0.009559 | 0.004224 | 1575 |
| hsa00450 | Selenocompound metabolism                   | 16      | 0.66971    | 1.967554 | 0.001672 | 0.009559 | 0.004224 | 1691 |
| hsa00900 | Terpenoid biosynthesis                      | 22      | 0.626749   | 1.98498  | 0.001675 | 0.009559 | 0.004224 | 4843 |
| hsa01210 | 2-Oxocarboxylate metabolism                 | 18      | 0.635577   | 1.911435 | 0.001704 | 0.009559 | 0.004224 | 2111 |
| hsa00670 | One carbon folate metabolism                | 19      | 0.619562   | 1.887175 | 0.001706 | 0.009559 | 0.004224 | 2669 |
| hsa00120 | Primary bile acid metabolism                | 14      | 0.714484   | 2.001    | 0.001751 | 0.009559 | 0.004224 | 1978 |
| hsa05340 | Primary immunodeficiency                    | 34      | -0.55304   | -2.11676 | 0.002571 | 0.009559 | 0.004224 | 5043 |
| hsa05330 | Allograft rejection                         | 33      | -0.58581   | -2.22693 | 0.002577 | 0.009559 | 0.004224 | 5783 |
| hsa05321 | Inflammatory bowel disease                  | 55      | -0.48496   | -2.09143 | 0.002584 | 0.009559 | 0.004224 | 4402 |
| hsa05310 | Asthma                                      | 23      | -0.55362   | -1.88739 | 0.002604 | 0.009559 | 0.004224 | 5526 |
| hsa05322 | Systemic lupus erythematosus                | 48      | -0.50527   | -2.09606 | 0.002639 | 0.009559 | 0.004224 | 5596 |
| hsa04664 | Fc epsilon receptor signaling pathway       | 63      | -0.40925   | -1.81471 | 0.002646 | 0.009559 | 0.004224 | 2994 |

|          |              |     |          |          |          |          |          |      |
|----------|--------------|-----|----------|----------|----------|----------|----------|------|
| hsa05144 | Malaria      | 47  | -0.43865 | -1.80844 | 0.002646 | 0.009559 | 0.004224 | 4156 |
| hsa05221 | Acute mye    | 65  | -0.39679 | -1.76725 | 0.002646 | 0.009559 | 0.004224 | 2655 |
| hsa05416 | Viral myoc   | 58  | -0.54261 | -2.34663 | 0.00266  | 0.009559 | 0.004224 | 4689 |
| hsa05320 | Autoimmu     | 44  | -0.47876 | -1.94365 | 0.002674 | 0.009559 | 0.004224 | 4689 |
| hsa05012 | Parkinson    | 203 | 0.323691 | 1.590482 | 0.002706 | 0.009559 | 0.004224 | 3989 |
| hsa05220 | Chronic my   | 76  | -0.38207 | -1.75465 | 0.002755 | 0.009559 | 0.004224 | 4719 |
| hsa04714 | Thermoge     | 189 | 0.331101 | 1.609794 | 0.002762 | 0.009559 | 0.004224 | 5346 |
| hsa05133 | Pertussis    | 71  | -0.43975 | -1.98296 | 0.002762 | 0.009559 | 0.004224 | 3454 |
| hsa04662 | B cell rece  | 79  | -0.44683 | -2.06859 | 0.00277  | 0.009559 | 0.004224 | 4335 |
| hsa05150 | Staphylocc   | 73  | -0.41362 | -1.872   | 0.002778 | 0.009559 | 0.004224 | 5366 |
| hsa05332 | Graft-vers   | 41  | -0.47119 | -1.86042 | 0.002778 | 0.009559 | 0.004224 | 5854 |
| hsa04512 | ECM-rece     | 82  | -0.4384  | -2.04002 | 0.002817 | 0.009559 | 0.004224 | 4226 |
| hsa04540 | Gap juncti   | 81  | -0.37561 | -1.74159 | 0.002825 | 0.009559 | 0.004224 | 3325 |
| hsa05140 | Leishmania   | 74  | -0.53913 | -2.44314 | 0.002849 | 0.009559 | 0.004224 | 3524 |
| hsa04640 | Hematopo     | 91  | -0.39136 | -1.86004 | 0.002882 | 0.009559 | 0.004224 | 5064 |
| hsa05222 | Small cell   | 90  | -0.4008  | -1.89676 | 0.00289  | 0.009559 | 0.004224 | 4226 |
| hsa01522 | Endocrine    | 94  | -0.3676  | -1.75845 | 0.002907 | 0.009559 | 0.004224 | 3186 |
| hsa04670 | Leukocyte    | 105 | -0.41794 | -2.04186 | 0.002907 | 0.009559 | 0.004224 | 2922 |
| hsa04064 | NF-kappa     | 98  | -0.43621 | -2.10538 | 0.002924 | 0.009559 | 0.004224 | 5413 |
| hsa04620 | Toll-like    | 98  | -0.40706 | -1.96465 | 0.002924 | 0.009559 | 0.004224 | 4495 |
| hsa04625 | C-type lec   | 98  | -0.36949 | -1.78334 | 0.002924 | 0.009559 | 0.004224 | 2669 |
| hsa05146 | Amoebiasi    | 98  | -0.42892 | -2.07019 | 0.002924 | 0.009559 | 0.004224 | 4764 |
| hsa04666 | Fc gamma     | 95  | -0.40976 | -1.96714 | 0.002959 | 0.009559 | 0.004224 | 2994 |
| hsa04668 | TNF signal   | 108 | -0.48309 | -2.37199 | 0.002959 | 0.009559 | 0.004224 | 4499 |
| hsa05145 | Toxoplas     | 108 | -0.41522 | -2.03878 | 0.002959 | 0.009559 | 0.004224 | 4226 |
| hsa04061 | Viral prote  | 87  | -0.39878 | -1.86413 | 0.002967 | 0.009559 | 0.004224 | 5192 |
| hsa04658 | Th1 and Th   | 86  | -0.47652 | -2.21727 | 0.002967 | 0.009559 | 0.004224 | 4719 |
| hsa05235 | PD-L1 exp    | 87  | -0.51222 | -2.3944  | 0.002967 | 0.009559 | 0.004224 | 4335 |
| hsa04933 | AGE-RAGE     | 99  | -0.36187 | -1.74364 | 0.002976 | 0.009559 | 0.004224 | 4719 |
| hsa05142 | Chagas dis   | 97  | -0.39904 | -1.91605 | 0.002985 | 0.009559 | 0.004224 | 4023 |
| hsa04659 | Th17 cell    | 96  | -0.48955 | -2.3467  | 0.003003 | 0.009559 | 0.004224 | 4746 |
| hsa04660 | T cell rece  | 96  | -0.43507 | -2.08554 | 0.003003 | 0.009559 | 0.004224 | 4335 |
| hsa04650 | Natural kill | 119 | -0.38376 | -1.9137  | 0.003058 | 0.009559 | 0.004224 | 4394 |
| hsa04926 | Relaxin sig  | 119 | -0.37375 | -1.86381 | 0.003058 | 0.009559 | 0.004224 | 4715 |
| hsa04611 | Platelet act | 114 | -0.38577 | -1.90359 | 0.003077 | 0.009559 | 0.004224 | 3240 |
| hsa04110 | Cell cycle   | 117 | -0.33202 | -1.64492 | 0.003145 | 0.009559 | 0.004224 | 4052 |
| hsa04380 | Osteoclast   | 122 | -0.47133 | -2.35293 | 0.003175 | 0.009559 | 0.004224 | 3598 |
| hsa01040 | Biosynthes   | 25  | 0.562857 | 1.846451 | 0.003215 | 0.009559 | 0.004224 | 3509 |
| hsa04550 | Signaling p  | 130 | -0.33503 | -1.68834 | 0.003215 | 0.009559 | 0.004224 | 5298 |
| hsa05135 | Yersinia inf | 130 | -0.38045 | -1.91722 | 0.003215 | 0.009559 | 0.004224 | 5386 |
| hsa04072 | Phospholip   | 138 | -0.32883 | -1.67781 | 0.003236 | 0.009559 | 0.004224 | 3919 |
| hsa04921 | Oxytocin s   | 138 | -0.32357 | -1.65097 | 0.003236 | 0.009559 | 0.004224 | 5021 |
| hsa00970 | Aminoacyl    | 24  | 0.585357 | 1.893836 | 0.003241 | 0.009559 | 0.004224 | 2995 |
| hsa04210 | Apoptosis    | 129 | -0.31414 | -1.58153 | 0.003247 | 0.009559 | 0.004224 | 4335 |
| hsa04630 | JAK-STAT     | 139 | -0.32916 | -1.67552 | 0.003289 | 0.009559 | 0.004224 | 4844 |
| hsa05162 | Measles      | 132 | -0.40495 | -2.04568 | 0.003289 | 0.009559 | 0.004224 | 4862 |
| hsa04614 | Renin-ang    | 20  | 0.606565 | 1.886458 | 0.003328 | 0.009559 | 0.004224 | 1549 |
| hsa00910 | Nitrogen n   | 16  | 0.614975 | 1.806746 | 0.003344 | 0.009559 | 0.004224 | 3962 |
| hsa04621 | NOD-like     | 161 | -0.37896 | -1.96941 | 0.003344 | 0.009559 | 0.004224 | 2669 |
| hsa05203 | Viral carcin | 161 | -0.38903 | -2.02171 | 0.003344 | 0.009559 | 0.004224 | 4428 |
| hsa05152 | Tuberculos   | 171 | -0.29821 | -1.56147 | 0.003378 | 0.009559 | 0.004224 | 4463 |
| hsa04218 | Cellular sei | 148 | -0.35381 | -1.81505 | 0.00339  | 0.009559 | 0.004224 | 4335 |
| hsa05161 | Hepatitis B  | 157 | -0.40255 | -2.0834  | 0.003401 | 0.009559 | 0.004224 | 4444 |
| hsa05202 | Transcripti  | 158 | -0.35666 | -1.84562 | 0.003413 | 0.009559 | 0.004224 | 3920 |
| hsa05164 | Influenza A  | 162 | -0.38974 | -2.0239  | 0.003425 | 0.009559 | 0.004224 | 5366 |
| hsa05206 | MicroRNA     | 163 | -0.40061 | -2.07319 | 0.00346  | 0.009559 | 0.004224 | 4056 |
| hsa05167 | Kaposi sarc  | 175 | -0.37164 | -1.94696 | 0.003484 | 0.009559 | 0.004224 | 4339 |
| hsa04360 | Axon guid    | 173 | -0.29931 | -1.56011 | 0.003497 | 0.009559 | 0.004224 | 4061 |

|          |               |     |          |          |          |          |          |      |
|----------|---------------|-----|----------|----------|----------|----------|----------|------|
| hsa04062 | Chemokine     | 177 | -0.37992 | -1.996   | 0.003509 | 0.009559 | 0.004224 | 4719 |
| hsa05130 | Pathogenic    | 184 | -0.33676 | -1.78799 | 0.003571 | 0.009559 | 0.004224 | 4023 |
| hsa05170 | Human im      | 191 | -0.30514 | -1.62752 | 0.003636 | 0.009559 | 0.004224 | 4335 |
| hsa05163 | Human cyt     | 210 | -0.36087 | -1.9546  | 0.00365  | 0.009559 | 0.004224 | 3977 |
| hsa05166 | Human T-c     | 211 | -0.42656 | -2.31591 | 0.003676 | 0.009559 | 0.004224 | 4402 |
| hsa04810 | Regulation    | 204 | -0.29813 | -1.60735 | 0.00369  | 0.009559 | 0.004224 | 3104 |
| hsa05131 | Shigellosis   | 209 | -0.31013 | -1.67141 | 0.00369  | 0.009559 | 0.004224 | 4148 |
| hsa05171 | Coronavir     | 195 | -0.36922 | -1.97132 | 0.00369  | 0.009559 | 0.004224 | 4873 |
| hsa04015 | Rap1 signa    | 194 | -0.32454 | -1.73189 | 0.003704 | 0.009559 | 0.004224 | 3306 |
| hsa05169 | Epstein-Ba    | 194 | -0.38973 | -2.07974 | 0.003704 | 0.009559 | 0.004224 | 5102 |
| hsa04510 | Focal adhe    | 196 | -0.35993 | -1.92476 | 0.003717 | 0.009559 | 0.004224 | 2820 |
| hsa05205 | Proteoglyc    | 199 | -0.34676 | -1.85134 | 0.003802 | 0.0097   | 0.004286 | 2859 |
| hsa04060 | Cytokine-c    | 249 | -0.28026 | -1.54778 | 0.003861 | 0.009773 | 0.004318 | 5202 |
| hsa05132 | Salmonella    | 244 | -0.34749 | -1.90562 | 0.003953 | 0.009927 | 0.004386 | 4210 |
| hsa04010 | MAPK sign     | 274 | -0.30031 | -1.68003 | 0.004    | 0.009969 | 0.004405 | 2729 |
| hsa04151 | PI3K-Akt s    | 321 | -0.267   | -1.52504 | 0.004032 | 0.009973 | 0.004406 | 4231 |
| hsa05165 | Human pa      | 316 | -0.29025 | -1.64967 | 0.004065 | 0.009978 | 0.004409 | 4226 |
| hsa05168 | Herpes sim    | 427 | -0.3596  | -2.10685 | 0.004405 | 0.010732 | 0.004742 | 5681 |
| hsa05200 | Pathways i    | 492 | -0.27596 | -1.64596 | 0.004739 | 0.011459 | 0.005063 | 4232 |
| hsa01523 | Antifolate    | 29  | 0.529322 | 1.804602 | 0.004823 | 0.011576 | 0.005115 | 1295 |
| hsa04975 | Fat digesti   | 35  | 0.488832 | 1.717429 | 0.00487  | 0.011602 | 0.005126 | 6657 |
| hsa00532 | Glycosamir    | 20  | -0.5818  | -1.90679 | 0.004988 | 0.011795 | 0.005212 | 4953 |
| hsa05134 | Legionello    | 57  | -0.38369 | -1.65378 | 0.005333 | 0.012522 | 0.005533 | 4026 |
| hsa04672 | Intestinal ir | 42  | -0.45387 | -1.80451 | 0.005435 | 0.012668 | 0.005597 | 5526 |
| hsa04115 | p53 signali   | 72  | -0.35136 | -1.5849  | 0.00551  | 0.012751 | 0.005634 | 5441 |
| hsa04940 | Type I diak   | 41  | -0.46799 | -1.8478  | 0.005556 | 0.012766 | 0.005641 | 4689 |
| hsa05210 | Colorectal    | 85  | -0.35278 | -1.62856 | 0.00597  | 0.013622 | 0.006019 | 2655 |
| hsa04721 | Synaptic ve   | 68  | 0.39329  | 1.601915 | 0.006309 | 0.014295 | 0.006316 | 4336 |
| hsa04514 | Cell adhesi   | 136 | -0.31576 | -1.6039  | 0.006645 | 0.014897 | 0.006582 | 3620 |
| hsa04145 | Phagosome     | 144 | -0.29641 | -1.51608 | 0.006667 | 0.014897 | 0.006582 | 3865 |
| hsa04657 | IL-17 signa   | 86  | -0.33076 | -1.53904 | 0.008902 | 0.019755 | 0.008729 | 2729 |
| hsa04919 | Thyroid ho    | 114 | -0.30141 | -1.48731 | 0.009231 | 0.020345 | 0.00899  | 2979 |
| hsa05224 | Breast can    | 135 | -0.30027 | -1.5254  | 0.009868 | 0.021604 | 0.009546 | 3061 |
| hsa04932 | Non-alcoh     | 137 | 0.323095 | 1.503688 | 0.01     | 0.021745 | 0.009608 | 4759 |
| hsa04330 | Notch sign    | 52  | -0.36985 | -1.56628 | 0.010582 | 0.022766 | 0.010059 | 2979 |
| hsa05100 | Bacterial in  | 67  | -0.3583  | -1.60531 | 0.01061  | 0.022766 | 0.010059 | 4509 |
| hsa05016 | Huntingtor    | 254 | 0.287287 | 1.454768 | 0.010724 | 0.022859 | 0.0101   | 4189 |
| hsa05414 | Dilated car   | 87  | -0.31749 | -1.48412 | 0.011869 | 0.025135 | 0.011106 | 3958 |
| hsa04935 | Growth ho     | 117 | -0.29478 | -1.46043 | 0.012579 | 0.026464 | 0.011693 | 3311 |
| hsa05412 | Arrhythmo     | 68  | -0.33784 | -1.51647 | 0.013587 | 0.028354 | 0.012528 | 2392 |
| hsa04950 | Maturity of   | 19  | 0.537327 | 1.636688 | 0.013652 | 0.028354 | 0.012528 | 1114 |
| hsa04066 | HIF-1 sign    | 100 | -0.30689 | -1.47887 | 0.014925 | 0.030801 | 0.013609 | 2662 |
| hsa00730 | Thiamine r    | 14  | 0.595226 | 1.667005 | 0.015762 | 0.032322 | 0.014281 | 1739 |
| hsa00030 | Pentose ph    | 28  | 0.478261 | 1.620836 | 0.016207 | 0.033027 | 0.014593 | 2062 |
| hsa00601 | Glycosphir    | 27  | 0.473136 | 1.581823 | 0.01642  | 0.033251 | 0.014692 | 4687 |
| hsa05160 | Hepatitis C   | 144 | -0.28114 | -1.43799 | 0.016667 | 0.03354  | 0.01482  | 4339 |
| hsa05231 | Choline me    | 94  | -0.31383 | -1.50124 | 0.017442 | 0.034884 | 0.015413 | 3728 |
| hsa04350 | TGF-beta s    | 87  | -0.31007 | -1.44944 | 0.017804 | 0.03539  | 0.015637 | 4053 |
| hsa04974 | Protein dig   | 87  | 0.355001 | 1.536533 | 0.018045 | 0.03565  | 0.015752 | 977  |
| hsa05211 | Renal cell c  | 65  | -0.33181 | -1.47786 | 0.018519 | 0.036364 | 0.016067 | 4335 |
| hsa04912 | GnRH sign     | 89  | -0.30943 | -1.46117 | 0.020408 | 0.039833 | 0.0176   | 3311 |
| hsa05215 | Prostate ca   | 97  | -0.29376 | -1.41053 | 0.020896 | 0.04054  | 0.017912 | 4150 |
| hsa05110 | Vibrio chol   | 49  | 0.396331 | 1.503971 | 0.024116 | 0.046509 | 0.02055  | 1751 |
| hsa00061 | Fatty acid l  | 16  | 0.533991 | 1.568821 | 0.025084 | 0.048089 | 0.021248 | 3118 |
| hsa05323 | Rheumatoi     | 90  | -0.29922 | -1.41604 | 0.026012 | 0.049575 | 0.021904 | 4023 |

## leading\_edcore\_enrichment

tags=51%, 210/8564/8836/23475/54490/10327/29968/3242/224/219/217/8942/55163/54575/205/  
tags=54%, 8802/414328/2653/51179/1962/229/2203/29968/4329/26275/48/5096/5313/6470/1892/  
tags=63%, 127124/4706/529/155066/29796/525/1337/245972/27089/9167/528/64077/4695/5061/  
tags=60%, 1610/8309/3155/51268/51179/1962/30/5827/11001/10901/5264/26061/8528/6647/104/  
tags=36%, 2938/2940/7172/1807/54490/1576/54575/54658/54657/54600/54576/54659/54579/545/  
tags=43%, 2938/2940/130/54490/1576/1551/54575/54658/54657/54600/54576/54659/54579/545/  
tags=41%, 123264/1244/6555/200931/54490/1576/9376/54575/54658/54657/54600/54576/54659/  
tags=55%, 130/36/1962/224/30/219/217/501/1892/10455/223/128/3033/34/38/51/10449/2639/33/  
tags=34%, 8309/5106/2168/1962/30/11001/345/1582/2710/34/51/364/5105/1593/33/81616/1376/  
tags=29%, 51268/1962/224/219/217/8424/501/1892/223/123688/3033/55526/38/2639/51166/39/  
tags=61%, 55256/635/29968/64902/23743/7263/1491/191/2729/3945/113675/4357/2937/2805/23/  
tags=70%, 3155/36/1962/4329/64902/26275/224/30/3712/219/217/18/5096/501/1892/223/3033/5/  
tags=52%, 2938/2940/130/1555/54490/1576/22977/27294/54575/54658/54657/54600/54576/5465/  
tags=42%, 8644/54490/1576/1551/54575/54658/54657/54600/54576/54659/54579/54577/54578/7/  
tags=58%, 130/1555/54490/1576/10901/317749/1551/54575/54658/54657/54600/54576/54659/54/  
tags=56%, 340024/6569/142680/7421/4495/2495/475/26872/4494/2512/1317/4496/645745/1132/  
tags=37%, 130/130589/5106/10327/229/2203/224/219/217/2538/5313/501/223/128/3945/5105/9/  
tags=46%, 2938/2940/130/1555/54490/1576/4129/2329/2326/54575/54658/54657/54600/54576/5/  
tags=57%, 8564/1962/4129/224/130013/64577/1644/219/217/8942/501/1892/223/3033/55526/31/  
tags=63%, 8802/1962/4329/26275/18/5096/1892/8801/79611/38/51/3945/84693/55862/594/5590/  
tags=45%, 5053/445/229/29968/48/95/5313/6470/162417/3417/84706/1491/435/113675/6472/50/  
tags=46%, 58510/1610/112483/79814/4129/8974/224/84735/219/217/8659/112849/501/223/4128/  
tags=35%, 23475/4907/5169/683/4860/316/54981/93100/349565/23409/554235  
tags=72%, 8802/5106/48/8801/3417/55753/5105/50/8803/47/2271/6390/4967/3420/5091/6392/5/  
tags=52%, 122970/11332/1892/3033/10449/641371/10965/51102/9524/60481/3030/79993/11714/  
tags=69%, 2653/51179/48/5096/6470/9380/132158/2731/38/112817/275/84693/54363/6472/5590/  
tags=56%, 5106/224/219/217/3029/5313/501/223/9380/38/3945/5105/197257/134526/55902/39/  
tags=91%, 54490/9365/55586/10327/224/219/217/54575/54658/54657/501/54600/54576/54659/5/  
tags=57%, 8836/5053/8644/249/2643/5092/6697/10243/1719/873/5860/4337/4338  
tags=64%, 1807/1962/4329/26275/224/84735/219/217/18/501/1892/223/51/51733/221/2571/557/  
tags=71%, 3155/1962/54988/123876/348158/56898/18/1892/3033/38/79944/6296/7915/39/2571/  
tags=69%, 1610/29958/51268/2653/635/4129/29968/64902/6470/501/9380/1491/132158/4128/27/  
tags=40%, 2938/2940/51471/2878/9027/3417/4258/4257/79017/2729/124975/9446/2936/2948/26/  
tags=24%, 10327/224/219/80339/217/2710/501/223/26007/132158/56894/253558/196051  
tags=51%, 36/1962/30/27349/1892/3033/7923/34/38/51/10449/54995/51102/33/81616/1376/39/  
tags=42%, 130/81889/4129/2184/3242/1644/3081/128/316/4128/4282/220074/221/2805  
tags=47%, 445/443/2346/64902/56954/8528/18/8659/2746/84706/435/7915/2744/189/2747/2805  
tags=44%, 210/54490/54575/54658/54657/54600/54576/54659/54579/54577/54578/79799/12445/  
tags=81%, 54490/9365/6652/10327/27294/51084/54575/51181/54658/54657/54600/54576/9942/5/  
tags=89%, 127124/529/760/155066/525/6521/245972/528/50617/526/535/9296/245973/9550/513/  
tags=55%, 445/95/162417/2746/84706/435/2744/2747/2805/384/2875  
tags=53%, 5053/10249/4129/3242/1644/4128/4282/221/2805  
tags=45%, 1807/224/219/217/5169/53354/51733/8876/79717  
tags=60%, 5106/2746/358/762/1468/5105/760/8671/2744/2747/486/481  
tags=45%, 9963/686/2346/8029/6948/113235/25974/335/6573  
tags=71%, 144193/443/4129/224/84735/219/217/10841/501/223/4128/26/3176/221/138199  
tags=44%, 22928/1491/51540/51091/22929/118672/56267  
tags=68%, 57107/38/51449/23590/39/79947/10654/2224/3422/10269/3156/4598/23463/116150/4/  
tags=56%, 48/95/162417/3417/84706/51166/50/2805/3420/2875  
tags=58%, 10588/10841/6470/10840/275/6472/4524/7298/1719/123263/4522  
tags=64%, 8309/1582/1593/10858/10998/10005/6342/23600/51302  
tags=65%, 29851/930/7374/5993/29760/915/916/920/5788/958/3718/3543/925/6891/7535/84876  
tags=67%, 3002/3122/3117/3118/3123/5551/3106/3135/3126/958/3119/3112/942/940/3113/3134  
tags=55%, 3123/6778/4772/3594/8809/8807/7099/7043/3126/50615/3553/3552/3119/3112/3113/  
tags=65%, 3122/3117/3118/3123/6356/3126/958/3119/3112/3113/3115/2207/2206/3108/3109  
tags=62%, 6628/3122/3117/2903/2215/717/1511/735/3118/3123/3126/958/3119/3112/942/940/2/  
tags=37%, 3635/5335/5321/5594/207/6654/241/208/8605/2207/2206/7409/8681/5880/5894/9846

tags=51%, 948/6401/7099/7043/1311/7059/3820/3553/958/3689/3082/22914/5175/6347/3576/29  
tags=43%, 597/11040/6777/6776/5604/7704/3845/8900/5594/207/6654/1848/5970/208/83439/92  
tags=62%, 3118/6442/6444/3123/637/5551/3106/3135/3126/958/3119/3112/3689/942/940/1604/  
tags=50%, 3002/3122/3117/3118/3123/5551/3106/3135/3126/958/3119/3112/942/940/3113/3134  
tags=37%, 91860/79861/4129/4137/810/4128/292/4706/29796/5602/1337/5715/27089/9167/818/  
tags=41%, 6777/6776/4616/25759/5604/1021/7043/1488/578/3845/399694/5594/207/4089/6654/  
tags=47%, 51287/65260/493753/4706/51103/29796/25915/84987/285521/79133/1376/1337/5124  
tags=45%, 840/3553/3552/2770/3689/6374/834/5594/51135/5970/3659/2771/3576/3394/6372/35  
tags=43%, 5604/4772/11006/5530/3845/4794/10859/971/3635/11025/5594/207/6654/5777/5970/  
tags=58%, 3872/3122/3117/3866/3858/2215/717/125115/3118/3861/629/9103/3123/3126/1828/3  
tags=71%, 3569/3125/3127/115653/3824/3002/3122/3117/3118/3123/5551/3106/3135/3126/3821  
tags=46%, 10319/1278/3914/948/3913/1286/1287/1311/7059/1288/9900/960/8515/1292/131873/  
tags=37%, 7278/23236/2778/113457/112714/2770/109/84790/5598/5154/5594/6654/111/112/277  
tags=47%, 3126/5743/3553/3552/3119/3112/3689/3717/5594/51135/5777/2212/1536/3113/5970/  
tags=55%, 100133941/930/7850/3574/2057/3118/1441/931/3123/915/948/916/951/3590/952/966  
tags=41%, 10319/3914/5728/3913/1286/1021/1287/578/5743/1288/6502/207/7157/5970/208/718  
tags=32%, 2778/6667/399694/109/5594/207/6654/5469/111/112/7157/208/4313/8202/182/4855/  
tags=35%, 6494/3689/5335/10398/103910/5175/4478/71/7852/1536/3702/2771/4313/1003/1365/  
tags=56%, 7412/9020/55367/6363/148022/7706/4615/597/4616/29760/2921/6351/6366/7099/230  
tags=38%, 6351/9641/5604/6373/3661/7099/7096/3553/958/6348/6349/414062/6352/942/5594/2  
tags=31%, 834/5594/207/1540/64581/5970/208/3659/2207/10379/5533/5971/5894/6237/5603/67  
tags=53%, 5747/22798/2769/7850/1285/1511/735/5331/2921/10319/1278/3914/3913/3315/7099/  
tags=37%, 3635/5335/5321/5594/207/273/4651/2212/208/8605/2213/8612/10163/7409/7408/305  
tags=44%, 2921/602/5604/6401/8809/4314/64764/6364/7132/5743/840/3553/6352/6374/5594/20  
tags=42%, 10319/3914/3913/7099/7043/8651/3306/3588/3126/7132/958/2770/3119/3112/3717/5  
tags=52%, 6363/3606/6362/1235/3572/2921/6351/6366/6373/729230/8797/10563/8809/8807/570  
tags=57%, 6777/6776/3118/3123/6778/915/4772/3594/916/5530/4794/920/55534/3560/3126/371  
tags=51%, 5604/915/4772/5728/10538/7099/916/5530/3845/4794/920/1460/917/919/3717/5335/  
tags=46%, 6777/6776/5331/4846/7056/4772/1278/6401/1286/7043/1287/1281/3845/2308/1288/3  
tags=43%, 5515/5331/915/7099/7043/916/7132/3553/23236/2778/2770/917/6348/6349/414062/9  
tags=54%, 3572/6777/6776/3118/3123/6778/915/4772/3662/3594/916/5530/4794/920/3560/3126  
tags=42%, 5604/915/4772/916/5530/3845/4794/920/5788/925/917/919/5335/940/5594/207/6654/  
tags=38%, 25759/5604/637/5551/4772/8797/3106/3135/5530/3845/3821/3822/399694/919/3689/  
tags=43%, 108/1910/5331/4846/25759/5604/6013/1278/1286/1287/64764/1281/3845/2782/1288/  
tags=37%, 23236/2778/2770/109/5584/5321/5594/103910/207/111/112/71/2212/2776/208/8605/  
tags=34%, 10274/4176/1021/10735/996/7043/8900/7533/10926/7534/991/29945/701/6502/2033/  
tags=43%, 54209/7132/126014/3553/10859/3552/8600/11025/10326/5594/207/55423/4286/1540/  
tags=48%, 122970/11332/30/51/641371/10965/6342/9524/60481/6319/8310/79993  
tags=42%, 1855/8313/3977/658/81029/652/4093/657/3572/4211/5604/79923/55183/6926/4090/3  
tags=45%, 5747/9564/7456/148022/3606/8874/7454/5585/4615/10096/1793/5604/4772/3661/709  
tags=36%, 9267/2917/3845/2846/8526/7249/23236/2778/399694/4254/109/5335/5321/5154/5594  
tags=43%, 782/6261/8536/3762/4638/108/4659/5331/4846/6263/5604/4772/53632/5530/3845/81  
tags=50%, 10667/51091/5188/124454/118672/55157/80222/123263/79731/10352/55699/54938  
tags=40%, 5604/637/5551/1521/8797/4170/578/3845/2081/7132/840/7278/113457/112714/4001/  
tags=38%, 2057/5771/3572/6777/6776/1441/6778/338376/4170/3594/8651/3590/3560/3588/5061  
tags=44%, 4615/57506/4940/6777/6776/10399/9641/637/915/3661/6504/7099/1021/916/578/330  
tags=45%, 4311/59272/2028/3816/5972/5476/290/1636/183  
tags=56%, 2746/762/760/2747/771/766/377677/768/1373  
tags=26%, 834/5594/51135/115362/114769/1536/5970/837/6347/3576/10379/4671/24145/11842/  
tags=39%, 85477/51564/27044/2967/3661/1021/3106/64764/3135/578/3845/8900/7533/23513/75  
tags=38%, 9103/537/3123/972/637/7099/7043/8411/5530/7096/23545/817/3588/3126/7132/4046  
tags=39%, 5604/4772/5728/5928/1021/7043/3106/3135/5530/2309/3845/8900/7249/2308/2305/3  
tags=39%, 4615/57506/6777/6776/537/6778/9641/5604/637/4772/3661/7099/7043/64764/3845/8  
tags=37%, 4314/8013/221037/578/2138/2313/5328/1655/6692/8900/3560/5546/3206/2308/958/4  
tags=51%, 3117/79671/5610/581/148022/3606/7706/56649/5611/4615/57506/10241/4940/3838/  
tags=44%, 4170/1021/8651/7168/672/6541/578/1945/3845/5328/90427/1946/10253/5743/9839/3  
tags=39%, 9641/5604/637/4772/3661/57580/1021/3106/3135/5530/578/3845/2782/7132/5743/37  
tags=34%, 8829/56963/6586/3611/29984/5530/1949/1945/3845/3983/817/10371/1946/64218/549

tags=46%, 6777/108/2868/5331/2921/6351/25759/6366/5604/6373/729230/10563/57580/6358/63  
tags=37%, 7099/114548/10972/9267/9138/347688/10094/578/2846/7132/840/5010/3553/7278/11  
tags=35%, 5604/637/915/4772/200315/3661/7099/684/916/3106/3135/5530/578/3845/2782/920/  
tags=36%, 1021/9138/3106/64764/3135/5530/578/3845/2782/3588/7132/7249/5743/3553/23236/  
tags=45%, 3123/5604/915/4772/5728/8829/996/7043/916/3106/64764/3135/5530/3845/920/8900  
tags=28%, 4627/23191/3689/8515/10398/5154/5594/103910/54961/6654/624/3696/4478/1730/71  
tags=33%, 55072/3661/10616/7099/114548/9267/3611/10094/2309/7132/5216/2308/3553/23236/  
tags=41%, 23521/4615/57506/4940/3572/735/6142/629/6139/9641/140801/3661/8829/7099/1145  
tags=32%, 9693/57568/23236/2778/2770/4254/109/6494/3689/5335/5584/9771/5154/3082/5594/  
tags=45%, 898/930/3516/11047/4615/57506/4940/3118/4616/29760/3123/9641/637/915/5719/36  
tags=29%, 8515/10398/5154/3082/5594/103910/1292/207/131873/6654/1293/3696/71/7148/208/  
tags=29%, 5335/960/3082/5594/207/6654/5777/4478/71/6548/7157/208/5500/3316/4060/4313/8/  
tags=41%, 3977/6363/3606/6362/8718/10148/658/7850/652/3574/1235/2057/657/3572/2921/635  
tags=36%, 2317/64746/10121/8797/7184/79443/7099/114548/399/9267/347688/10094/578/7132/  
tags=25%, 5598/5321/5154/3082/5594/207/6654/1848/51135/3727/7157/5970/208/8605/2005/21  
tags=32%, 29941/10319/1278/3914/5728/3913/7184/4170/7099/1286/1021/1287/64764/672/2309  
tags=34%, 10319/1278/3914/5728/3913/3661/1286/1021/1452/1287/3106/64764/3135/578/1311/  
tags=43%, 162972/5819/8503/84911/79744/6431/55786/7592/3122/91120/64170/57232/284306/  
tags=32%, 7428/10319/7704/3914/5728/3913/7184/3594/1286/1021/7043/9138/1287/1488/11239  
tags=38%, 8836/1244/6470/2348/9429/6472/113235/4524/7298/1719/1147  
tags=63%, 84647/4547/2168/38/39/335/81579/50487/80168/5407/8613/2169/1056/2806/5319/29  
tags=75%, 26229/10090/29940/55454/337876/55501/64132/50515/54480/56548/113189/55790/6  
tags=44%, 1195/7099/3306/840/3297/3553/57396/1937/3689/834/5970/3576/4671/929/7097/331  
tags=55%, 3122/3600/9020/29851/3117/3118/3123/3126/958/3119/3112/942/608/940/7852/3113  
tags=50%, 55240/55367/143686/5268/11200/581/898/27244/3732/4616/50484/8493/637/5728/87  
tags=54%, 3118/3123/5551/1363/5799/3106/3135/3126/3553/3552/3119/3112/942/940/3113/313  
tags=28%, 5594/207/4089/6654/10018/7157/208/332/83439/374/6932/5880/5894/7042/10000/83  
tags=44%, 6809/6540/127124/6505/529/155066/525/10497/245972/528/50617/6532/526/535/929  
tags=38%, 3106/3135/920/3126/5010/5788/958/925/80381/3119/3112/23705/3689/4684/942/940  
tags=40%, 3106/8411/347688/3135/1311/23545/3126/338382/7059/6441/7278/113457/112714/3  
tags=28%, 5598/6374/5594/6280/3727/5970/6347/3576/6372/5603/3551/3934/29761/836/4312/2  
tags=29%, 8850/5335/9882/2033/5594/207/3065/5469/71/6548/7157/208/25942/8202/4855/489/  
tags=27%, 6667/8600/399694/26508/5594/207/6654/7157/208/83439/8202/3280/182/23462/8032  
tags=41%, 5313/4706/29796/5602/3643/1337/27089/9167/4695/4705/4728/4704/51085/4717/625  
tags=35%, 8850/26508/2033/3065/3280/182/23462/4855/3955/9794/6310/4853/1857/3714/6868/  
tags=34%, 10096/1793/25759/3611/10094/8218/63916/399694/71/858/10163/857/391/9844/1009  
tags=34%, 79861/2878/6647/292/4706/29796/5602/5432/2892/1337/5715/27089/9167/10671/469  
tags=36%, 3679/108/6442/6444/7043/7168/6547/7171/2778/109/8515/111/3696/112/71/22801/3  
tags=28%, 4214/23236/2778/2770/399694/109/3717/5335/2033/5594/207/6654/111/112/1385/27  
tags=26%, 3696/71/22801/83439/2697/3676/3675/3694/489/3908/6932/55799/4000/1756/60/367  
tags=26%, 6514/5313/3174/3172/6927  
tags=28%, 5335/2033/5594/207/405/1536/5970/208/3099/6513/226/5163/285/3939/10000/8569/  
tags=43%, 205/249/9054/204/84284/52  
tags=36%, 414328/51071/229/64080/2203/132158/9104/729020/6120/5631  
tags=48%, 8702/2525/2528/79369/10402/2651/2529/2527/53947/28/8706/10678/6487  
tags=30%, 9641/5604/637/3661/1021/578/3845/7533/7132/5010/7534/23586/5594/207/6654/945  
tags=36%, 204962/3845/8526/7249/6667/5335/5321/5154/5594/207/6654/1609/208/1120/8605/5  
tags=36%, 56963/7043/57154/2200/5308/4090/285704/3399/3625/93/26585/6667/2331/2033/559  
tags=18%, 4311/340024/9056/11136/1803/7512/6520/59272/23428/8645/6505/117247/10008/56  
tags=35%, 5604/7428/7043/112399/3845/5546/3082/2033/5594/201163/207/6654/2113/405/208/  
tags=33%, 3845/817/4214/23236/2778/109/5598/5321/5594/6654/111/112/2776/8605/4313/8681  
tags=33%, 5728/7184/4314/64764/3845/5328/6692/2308/5154/2033/5594/207/6654/1385/7157/2  
tags=29%, 127124/529/155066/5336/525/245972/528/50617/526/535/9296/245973/9550/51382  
tags=50%, 27349/7923/54995/51102/81616/84869/2180/197322  
tags=42%, 7099/7043/4314/6364/23545/3126/3553/3552/3119/6348/6349/414062/8600/3112/635

'54658/54657/5313/6470/54600/54576/54659/54579/145226/54577/249/54578/53354/2643/51109  
2/8801/2746/3417/26007/128/84706/132158/2731/38/51/55753/275/113675/84693/54363/6472/5!  
7/526/535/9296/4705/4728/4704/4717/245973/6390/9550/1349/51382/1350/4720/4722/6392/473  
155/3417/5830/51/2053/26063/55825/283927/54363/5191/189/1384/1891/5194/10005/5052/6342.  
577/54578/4258/4257/151531/51733/8824/79799/9446/2948/9/83549  
77/128/54578/4258/4257/79799/9446/2948/9/2052/221/873/64816/56267/1553/1577/119391  
/54579/54577/54578/10864/358/79799/6580/760/9429/8671/3781/2052/5243/10998/5244/6256  
3/81616/1376/39/1632  
/10998/2170/6342/6256/335/1622  
79723  
382/27430/4144/56267/2730/4507/4191/6898/58478/259307/51074/883/137362/6611  
549/316/34/38/10449/84693/3028/594/56922/27034/5095/39/64087/1629/11112  
59/54579/54577/128/54578/4258/4257/79799/8574/9446/2948/2052/221/873/1553/1577/119391/  
7923/1586/79799/3291/220074/1577/3284/6716  
4579/145226/54577/128/54578/316/51109/79799/8228/9249/54884/1577/157506/53630/54905/15  
35/3163/4501/55630/115019/140803/4493/1181/7779/261729/4502/486/540/3162/481  
562/55902/221/80201/5232  
54659/54579/54577/128/54578/316/4128/4258/4257/79799/9446/2948  
6/4128/38/26/2639/23498/51166/39  
2/5095/39/8803  
/5723/2805/27430/4144/384/729020/6120/5232/3420/5091/5631/2875/5230  
3/112817/26/2628/2805/2593/384/4942

162/4191/3421/6391/1738  
5  
12/50/189/81888/5095/39  
2271/5091/5162/4191  
54579/223/54577/54578/79799/7358/9104

48/35  
622/35  
'31/55349/275/2628/113675/6472/189/1757/5723/2593  
578/2937/290/2880/119391/9588/2730

3342/84869/35/9524/2180/60481/6319/197322/3030/8310/79993

4/3163/645  
54659/54579/54577/54578/79799/7358/729020/6120  
382/496/10723/1188/534/9114/527/523/90423/495

1597

/3575/4261/100/3932/64421/6890  
/3115/3133/3108/3107/3105/3109  
'5970/3115/3108/7097/6775/6772/7042/64127/4087/6774/3460/3109/7100/3725/3566

212/3113/729/3115/3108/716/6737/718/2209/713/714/3109/715/87  
/100137049/5603/10000/27040/4067/3937/6850

95/6403/7097/7058/2532/7042/975/3683/3383  
9/6932/5894/5371/2209/3551/10000/862/4609/6774/3684/890/1436  
71/3113/3134/3115/3133/27/1525/3108/3908/3107/5880/857/3105/836/3683/3383/1756/60/3109/  
/3115/3133/3108/3107/3105/3109  
4695/4705/4728/4704/5683/4717/6390/5686/5701/1349/1350/10131/65018/5705/4720/4722/639/  
3065/7157/5970/208/2122/5894/9846/3551/7042/10000/4609/867/1026/5925/1643/4792  
1/27089/9167/6009/788/4695/388753/4705/4728/4704/4717/6390/1349/1350/4878/4720/4722/81  
3376/929/716/718/23643/5603/836/713/2353/3684/714/3678/715/29108/10392/3725/710  
208/2213/10288/5533/7409/5880/5894/3551/10000/4067/2353/975/27071/4792/8519/6850/4773/  
119/25984/3112/3689/1675/3075/2359/3880/2212/3113/2213/3115/6403/6404/3108/716/2357/71  
/3553/3552/3119/3112/942/940/3113/3134/3115/3133/3108/3107/3105/3109  
1293/3696/7148/22801/375790/3676/3675/3694/3908/7058/9899/3911/3339/1282/2335/3678/36/  
6/1902/2771/2697/5894/5159/196883/113/5332/10376/5156/84617/7846/3710/5579/203068  
3115/4688/3108/3676/653361/7097/718/2209/5603/6772/7042/4689/2353/3684/3460/3109/4792/  
/920/3126/3553/2323/911/3552/925/917/3119/3112/4254/960/914/1438/1604/3113/947/3115/35/  
5/3675/3908/3911/3551/10000/836/4609/1282/2335/1026/9134/330/5925/1643/3685/4792/7188/  
5894/4853/10498/5603/196883/113/3714/10000/2353/4854/1026/1839/5925/3725  
4688/7409/7408/3676/653361/9076/5880/5603/58494/83593/4689/90952/10627/1364/3684/7414,  
85/5328/7132/5743/3553/6357/958/1460/23586/142/8600/5335/51135/1540/5970/3576/7185/75/  
07/51135/5970/208/3576/51311/51284/353376/929/7097/23643/5603/6772/3551/10000/2353/34/  
72/1263/3551/1960/10000/868/1959/4792/26253/29108/6850/22808/3710/4773/3725  
1286/7043/1287/1281/338382/1288/3553/23236/911/2778/5269/3689/5869/2776/5970/3576/929/  
5/653361/8681/5880/5894/9846/100137049/2209/10000/27040/10095/50807/4067/8877/10109/3/  
7/1385/5970/208/3659/6347/7185/182/6372/5603/3551/64127/10000/836/9252/3976/9586/2353/  
594/207/51135/3113/5970/208/2771/3115/1234/3108/3908/3587/7097/3310/23643/4261/5603/67  
07/6358/6356/6364/1236/3560/3588/7132/6357/6348/6349/414062/6375/6846/6355/6352/6374/  
8/917/3119/919/3112/3717/5335/5594/3113/5970/3115/864/182/7535/5533/9794/3108/4853/677  
940/5594/55509/207/5777/5970/208/7535/5533/353376/7097/5894/5603/6772/3551/10000/27040/  
553/23236/3552/3717/5335/5594/207/4089/1536/5970/208/6347/4313/3576/5603/6772/7042/100  
19/6352/5594/207/51135/624/2776/5970/208/6347/2771/3576/7097/718/5603/3551/7042/10000/  
/50615/3553/3718/917/3119/919/3112/3717/5335/5594/4089/3113/5970/3115/7535/9466/5533/3/  
/5777/3702/5970/208/5063/7535/5533/7409/5894/5603/3551/10000/8440/27040/5588/2353/3932  
5335/962/5594/6654/3384/22914/5777/2207/3133/7535/5533/7409/7305/4277/3107/10870/5880/  
6019/23236/2778/2770/399694/109/5594/207/6654/111/112/1385/5970/208/2771/4313/2790/279  
5500/2771/2207/84876/7408/8681/10672/6786/100137049/5603/196883/113/6916/10000/5332/40  
4089/3065/891/7157/4172/4171/8317/4174/7272/5933/7042/8379/4087/4609/9232/1026/9134/59  
3727/2212/1385/5970/208/2213/10288/4688/10379/5533/8792/5971/7305/653361/9846/814/220

845/8324/3399/3718/3625/5462/93/3717/7994/648/5594/207/659/4089/6498/4086/5460/208/362  
9/114548/9138/10094/920/3553/63916/925/9815/5335/834/5594/207/51135/71/2212/2776/5970/  
1/207/6654/111/1609/112/208/8605/1902/3576/2207/2206/8612/8681/10672/5894/5159/6237/984  
7/952/5743/4881/4208/23236/2778/2770/109/5021/4882/10398/5598/5321/5594/111/112/71/277

142/839/1520/84790/6709/5594/207/5783/9451/10018/71/7157/5970/208/332/3563/7185/824/14  
5/3718/3717/5154/2033/207/6654/5777/1438/5617/3953/208/3563/8554/10379/9466/85480/918/  
6/3560/51209/3553/3718/1460/3552/917/23586/30835/940/103/207/51135/9451/4478/7157/5970

9/22900/4939/5603/10628/6772/3551/9447/64127/5332/90550/3455/10135/2919/7158/330/4792/  
534/991/3718/728340/730394/8850/5423/6502/2033/5594/3065/1385/7157/5970/3134/1234/7185.  
/3553/3552/3119/30835/3112/1520/3689/3717/2033/5594/207/5869/51135/2212/64581/1385/311  
552/204851/5594/207/2113/891/7157/5970/208/5500/3134/3576/3133/5533/824/3107/5894/6237  
900/4214/7534/3718/23586/3717/2033/5594/207/4089/6654/51135/1385/7157/5970/208/332/357  
208/3087/6667/5081/51274/942/5154/648/1848/4286/3065/4086/7157/5970/25942/2005/3576/71  
3118/3123/9641/5604/637/8106/8797/3661/7099/1021/114548/578/23633/3126/7132/7177/3553/  
99694/1789/5335/960/406996/5598/5154/648/2033/5594/659/6654/27086/54541/3065/6768/100/  
17/942/5335/2033/5594/207/9976/1385/7157/5970/208/3134/1234/2790/3576/83439/2791/3133/  
110/2770/2042/5335/10398/5594/103910/54961/10154/91584/659/7852/85464/5063/2771/2041/6



356/6364/2309/3845/2782/1236/6357/3718/23236/2870/2770/6348/6349/414062/399694/6375/68.  
3457/112714/4627/23191/6188/84790/834/5594/51135/5777/4651/71/2212/5970/837/5063/1902.  
7132/2770/917/919/5335/5594/207/51135/891/85363/7852/2776/5970/208/5063/6891/2771/3134  
2778/2770/6348/6349/414062/6667/6352/109/5732/5594/207/6654/111/112/7852/1385/2776/715  
/3560/3126/7132/958/4214/991/3718/917/3119/29945/701/8850/3112/109/3689/5423/4488/2114  
/6548/221178/7852/22801/5500/85464/5063/1902/3687/7074/10163/7409/3676/3675/3694/4660.  
'63916/6352/5335/960/10398/7321/834/5594/103910/207/71/7157/5970/208/837/3576/831/7307/  
548/6217/4314/6169/11224/6230/7132/6229/3553/6181/200916/6146/6157/23586/6188/2197/533  
135/207/111/25865/112/71/2776/208/1902/2771/7074/64411/7409/7408/9732/5880/5894/2357/5  
61/1021/916/3106/3135/578/4794/8900/3126/958/3718/917/23586/3119/919/3112/960/6502/207  
'22801/5500/5063/858/7409/7408/3676/3675/3694/4660/3908/824/5880/5894/857/5159/7058/522  
58/7074/80326/7409/4660/10855/8826/7097/5894/857/6237/2817/5603/7042/11211/10000/836/9  
1/1441/6366/6373/729230/338376/8797/10563/3594/8809/8807/57007/7043/6358/6356/6364/355  
'338382/5216/840/5788/388/51209/3553/7278/63916/113457/112714/23191/3836/6188/1639/847  
22/1847/5533/5971/1844/57551/374/3925/8681/11221/929/1846/5880/5894/55799/5159/6237/28  
'1945/1311/3845/5529/2846/2782/1946/3560/7533/6794/7249/7059/1288/2323/7534/3718/4254/  
'3845/5529/23545/55534/8900/7132/7249/7059/8638/5743/23513/2308/1288/8324/2778/5584/855  
730051/3117/5610/7549/581/148022/54753/8890/57573/27102/57615/93134/285268/148254/575  
'9/578/3845/817/2846/2782/8900/3560/5743/840/2308/1288/8324/2323/3718/23236/2778/23604/

881/337/10554/338/1208/8513/84649  
4131/51363/22856  
0/718/836/3684/2919/4792/29108/7100/317/2920  
/3115/3108/3676/10673/3601/3109/56477  
'97/1021/7249/6241/92344/891/7157/51246/64065/64393/836/1026/9134/5054/4194/1643/894/47  
4/3115/3133/3108/3107/3105/3109  
6/4087/2353/4609/5900/1026/1643/5366/3725  
'6/245973/9550/51382/10814/6538/6511/534/5864/594855/9114/527/523/90423/6530/773  
/3384/914/5175/3696/1001/3113/947/3134/3115/6402/23114/6403/1003/6404/3133/1365/57502/  
119/30835/81035/3112/1520/3689/84790/5869/71/2212/1536/64581/3113/6891/2213/3134/3115/  
353/2919/23765/10758/4792/7188/7128/2920/3725  
6513/5894/4853/10499/6772/9969/10000/5332/4609/4854/60/3685/9968/3091/5214/5579/23389  
'6/4855/6932/10023/5894/4853/23401/1857/11211/3714/10000/2353/4609/2260/4854/1026/5925.  
'6/6390/1349/1350/4720/4722/6392/2931/4731/4711/7386/4694/1351/374291/10975/51422/1006.  
4854/151636/9253  
'5/867/7414/2335/26052/10109/3059/60/3678  
'5/55062/55081/4705/4728/4704/5683/2880/4717/6390/5686/5701/1349/1350/5705/4720/4722/63  
676/3675/3694/489/3908/55799/196883/113/7042/4000/1756/60/3678/3685/784  
76/208/2771/5894/5603/6772/196883/113/10000/5332/9586/2353/9021/3667/6774/3726/3710/55  
8/3685/784

6774/1026/5054/3460/5209/7076/1906/3091/5214/5579/2026/3098

1/91543/7157/5970/208/4599/8554/1365/10379/9076/5894/4939/6772/3551/10000/836/4600/902  
6261/8612/10163/8681/5880/5894/5159/100137049/6581/10000/8527/1606/2353/5900/5156/571  
'4/9241/659/4089/64750/4086/10468/3624/654/5933/7042/4087/4609/4681/9765/7050/4052  
46/6519/5645  
'5063/6513/5894/7042/10000/1026/3091/3725  
/5894/100137049/5603/196883/113/5332/4215/1839/1958/3710/5579/3725/2796  
950/5970/208/83439/6932/5894/5159/2078/3551/10000/9586/2260/5156/1026/9134/5925/4792

'5/3689/942/940/6374/3113/6347/3115/3576/8792/3108/6372/7097/10673/7042/4312/2353/2919/

1/57026/2729/79799/9054/204/23498/54995/93100/6697/79717/6472/1723/349565/124454/84274  
5902/50/189/4524/2098/5095/5723/2747/2805/39/8803/9104/2271/6390/4967/729020/80201/612  
1/479/4711/496/7386/4694/5464/1351/374291/10975/534/1537/7385/6391/4723/4709/126328/12  
/5825/92960/4358/23600/5826/255027/196743/11264/847/10654/5192/5189/8800/2180/8504

1565

58

/8672

2/4731/6622/4711/7386/4694/5694/347733/118424/1351/10213/7416/374291/10975/7295/5704/1  
.10/6392/137682/4731/4711/7386/4694/2180/1351/6599/374291/10975/57104/51422/26291/1537.

/5579/3725

.8/2209/728/713/3684/3683/3383/714/3109/715

35/7450/1284/3918/961/3915/3371

/65108/5579/3725

63/945/928/3108/3676/3675/929/3575/912/2209/3684/3678/3554/3109/1436/3566

'1284/317/3918/3915

/3683/3383/83700/60/5579/87

35/8792/5971/353376/929/7329/23643/10673/3551/27040/5588/4067/3932/2919/3383/330/3554/  
55/4792/7100/3665/1326/3725

'3908/7097/912/5272/3911/7042/836/5332/1282/3684/2919/7414/2335/3554/1284/3918/2920/55/  
985/4082/6850/65108/5579

'9021/3726/2919/197259/3383/330/4792/7188/7128/7133/2920/11035/1906/1326/3725

'72/3911/3551/7042/10000/836/6774/330/3460/3109/4792/3918/3915

7852/6368/5197/6347/1234/51554/3576/6372/3587/2919/1436/7133/2920/56477

5/5603/6772/3551/3714/27040/5588/2353/3932/4854/3460/3109/4792/4773/3725/3566

)29126/5588/2353/6774/3932/4215/3460/4792/3091/4773/3725

)00/836/5332/4087/6774/1282/3383/2335/5054/1284/1958/1906/5579/3725

'5332/713/4087/2353/714/5054/3460/4792/3725

.108/5603/6772/3551/27040/196/4087/5588/2353/6774/3932/3460/3554/3109/4792/3091/4773/37  
/3937/868/4792/4773/1326/3725

'5894/3105/27040/836/3455/3932/3937/3683/3383/3460/6850/4773/5579

)1/54331/5894/5603/196883/113/408/10000/59/5332/4087/9586/4312/2353/1282/4792/1284/1906

)67/64805/10627/3937/60/10235/7450/83706/6850/5742/3710

)25/994/894/23594/472/896/890/2810

9/5603/6772/3551/7042/10000/4689/2353/9021/3455/3932/3937/3726/2274/3460/3554/4792/143

4/6929/80326/3198/6932/5894/5603/1857/11211/10000/3976/4087/4609/6774/2260/2535/9314/3

'208/6347/3576/7535/10163/7409/3676/5880/6196/5603/3551/10000/391/27040/9844/10095/235

6/100137049/196883/113/10000/8527/56895/1606/5332/8877/9170/5900/5156/26052/9265/9266

6/8605/5500/2771/5533/4660/8681/3759/5894/55799/814/100137049/196883/113/5332/2353/10

39/5894/1616/3551/10000/836/10376/2353/4000/823/330/60/4792/472/317/5366/7846/3710/372

)1439/3587/5894/5159/3575/6775/6772/10000/3976/9021/4609/3455/6774/3601/5156/1026/346

)208/2213/4599/10379/51284/7097/3310/4939/6772/3551/10000/836/4600/2353/3455/6774/868/

3428/7188/29108/7128/10392/2634/2920/11035/3665/3710/84674/3725

/3133/10379/9759/3107/718/3105/5933/5966/1960/8379/836/9586/4067/6774/9734/1026/9134/6

.3/5970/208/2213/3115/3687/2207/5533/3108/4360/929/3587/7097/5894/718/2209/4261/5603/11

'3105/5603/5933/7042/677/10000/678/83593/4087/4609/90550/1026/9134/823/5054/5925/10758

'6/353376/7097/5894/6775/5603/6772/3551/7042/1960/10000/836/9586/2353/4609/6774/3339/10

.85/3207/6929/2120/8842/5090/4300/929/5371/8148/2209/2078/5966/862/4609/3684/1026/64918

3552/23586/3119/3836/3112/6352/3717/103/834/2033/5594/29107/207/51135/64499/91543/71/3

18/7148/7157/8434/4855/6624/7431/3925/7329/9759/5894/4853/5159/3551/7042/1545/836/9252.

'10379/5533/3055/4277/6932/54331/3107/5894/285/718/3105/5603/6772/3551/10000/836/4067/2

091/2048/57556/5533/10509/7220/91653/5880/5894/5163/6237/5362/57522/8440/10627/10507/2

46/6355/6352/109/3717/5335/6374/5594/207/6654/111/112/7852/6368/2776/3702/5197/5970/20/  
/4644/3576/4642/10163/1365/4671/9076/10672/3071/9871/5603/3551/8440/836/10095/10376/64  
/1234/2790/2791/3133/5533/25939/54331/3107/5880/7097/5894/3105/5603/9582/3551/10000/83  
57/5970/208/6347/6891/2771/3134/1234/2790/3576/2791/3133/5533/10672/54331/3107/3587/588  
/2033/5594/207/4089/111/2113/112/1385/7157/3113/5970/208/2005/3134/3115/6929/3133/2001  
/10672/5880/8826/5894/3071/5159/6237/10095/10627/9459/2260/9170/3684/7414/55740/5156/3  
'10163/4671/3099/929/824/718/7322/5603/3551/23048/10000/9844/9252/10095/5332/5588/1062  
5/1675/103/834/5594/25873/51135/6232/2212/1536/5970/729/6347/3576/6223/6403/6203/4599/  
159/6237/285/51735/5228/5603/196883/113/10000/27040/5332/83593/1268/2260/3937/9170/590  
/51135/3065/10018/7157/3113/5970/208/5713/25942/6891/3134/3115/864/3280/3133/10379/310  
28/3911/10000/10627/1282/7414/5156/7791/2335/330/60/3678/64098/3685/894/7450/1284/896/2  
67/4087/5329/4609/6774/867/3339/2260/406991/2335/1026/3059/1839/60/3678/7078/3685/2535  
90/920/10220/1236/3560/3588/9573/7132/9235/939/50615/133396/3553/6357/3557/958/3552/36  
'90/10398/834/5594/103910/207/5869/51135/71/5970/208/837/5063/3576/83439/64837/3831/467  
35/3310/5228/100137049/6196/5603/1616/1850/3551/7042/408/10000/836/9252/6789/4915/8569  
'4602/3717/8515/5523/5154/3082/5594/1292/207/131873/6654/54541/1293/5617/3696/10018/13  
15/5523/26508/2033/5594/1292/207/131873/6654/3065/1293/3696/1741/1385/7148/7157/5970/2  
47/4615/163081/57506/7594/284390/10189/4940/125893/7730/26974/3118/440515/7637/55762/6  
'2770/6667/1612/4254/109/3717/5335/6502/2736/5732/26508/5154/3082/2033/5594/207/4089/60

72/896/317/5366/2810

'3108/3676/9076/9019/3107/3105/29126/58494/90952/1364/3684/3683/3383/83700/3109/3685/60  
9146/3133/4688/3108/4360/653361/929/3107/7097/7058/718/3105/2209/11151/55176/10376/468

/1643/2535/2247/7474/3725  
2/1537/7385/6391/4723/4709/126328/125965/9377/7384/4700/4697/6945/51094/4713/4715/4690

392/4731/5440/5435/4711/7386/4694/5694/3766/347733/1351/10213/7416/374291/10975/2902/5

579

'1/4609/3455/6774/1364/975/1026/5925/4792/317/3665  
53/3091/5579/3725

'3683/3383/3109/2920/3725/10312

/10243/2937/554235/1719/7358/51004/27430/9104/1728/9249/4337/51805/4144/5372/7389/7372/  
0/5232/3420/5091/847/5631/6392/2875/5230/35/5162  
!5965/9377/7384/9114/527/4700/523/4697/4713/4715/4696/4701/90423/495/4716

.813/1537/25828/10105/3709/5568/7385/6391/4723/7280/4709/147700/801/7314/126328/125965  
/6300/5568/7385/6391/9658/29078/4723/107/4709/126328/125965/9377/5468/7384/4700/4697/4

4792/7188/472/7128/6850/2920/5579

79/3915/87

'25/3566

3/3725

6/6850/4773/2355/3725

3720/2247/7474/463  
3/3932/3937/2335/10109/60/3678/4792/29108/4773/3725  
6/6850/22808  
26/60/5997/784/29904/57118/3710/4773/5579/3725

5  
0/894/896/10401/3566  
'9134/4792/894/896/7128/317/3665/3725

672/5925/1959/4792/894/7188/896/890/5366/6850/5922/3665/5315/3725/87  
1151/6772/1263/7042/64127/10000/836/8877/3684/3460/3109/26253/317/6850/10312  
3/894/472/896/890/22808/3710/4773  
026/9134/5925/1959/1643/4792/890/317/3665/4773/5579/3725  
9/330/1643/894/472/4297/890/1436/64332/604  
113/5970/208/6347/3115/3576/4599/10379/8766/3108/51284/5894/5371/10482/4939/4261/6772/  
/23405/1788/3667/4609/6774/4854/1786/5156/406991/1026/9134/2146/3678/7078/4194/994/894  
2353/4609/3455/6774/2919/3383/1026/7538/5925/4792/6850/2920/2247/3665/3091/3710/4773/3  
2047/55740/64221/3985/2242/1808/1969/5361/10505/2051/4773/7474/23380

8/6347/2771/1234/2790/3576/2791/7074/7409/3055/653361/6372/54331/1794/5880/5894/6772/1  
.005/2353/9170/9181/1364/10109/4542/3059/60/3554/9265/9266/55971/4792/84617/29108/7100,  
36/2353/6890/3985/27350/567/4792/7188/8906/472/7133/8905/3710/4773/5579/3725  
30/5894/11214/3105/5603/196883/113/3551/10000/836/5332/9586/4609/6774/5156/1026/6890/5  
86/5533/3108/5971/6513/3107/3105/196883/113/3551/7042/4316/10000/8379/4087/9586/2353/4  
683/2335/7114/10109/60/3678/3985/3685/2247/22808/87  
7/9181/7414/823/92610/10109/3059/60/3678/3554/9265/9266/4792/7188/472/29108/10392/7100  
10379/51311/51284/9636/716/7097/6202/718/4939/5603/6772/728/3551/6134/6168/713/4600/61  
00/3684/55740/5156/3683/23683/60/10235/1969/1436/2247/22808/51466/5579  
08/5971/7431/9636/3107/7097/3105/4939/5603/6772/3551/10000/836/4067/4609/3455/6774/368  
2316/3918/5579/3915/3371/3725/87  
5/2316/2247/22808/3091/3710/5579/7474  
25/93/6348/6349/414062/8600/6375/6846/6355/6352/8771/608/94/6374/659/1438/7293/5617/39  
71/23207/112574/929/6932/7097/5894/3071/6237/23643/57381/5603/3551/10000/391/9844/836/  
/2353/4609/2260/5156/4215/3554/9448/994/1843/10235/784/2316/1969/1436/5922/2247/22808/  
85/7148/7157/5970/208/22801/1902/3563/2790/2791/200186/55012/3676/3675/374/3694/9180/3  
08/22801/3659/3134/83439/3280/182/23462/4599/3133/80326/55012/10379/4855/3955/9794/367  
3432/55659/10520/162966/6429/100289635/3123/972/9641/637/8427/10308/57677/10838/7699/8  
354/4286/3065/624/1438/111/2113/405/112/10018/7852/2776/7157/2950/5970/208/1902/2771/3

514/1462

39/3684/6890/60/3678/3109/3685/84617/715/7846/203068/10312

3/4701/6720/4716/3630/5465/5564/4714/1329/84701

704/146754/4294/7019/1537/10105/7802/7385/5441/6391/1768/4723/6875/7280/4709/147700/1

2/4338/55312/11019/53630/2730/80347/4351/7390/80308/4522/5805



/9377/7384/5692/5702/4700/7326/4697/4713/3708/842/4715/4696/4701

!713/6195/10891/1374/4715/4696/4701/63976/84699/6199/91942/4716/28958/5564/4714/4893/1:

'3551/11100/10000/836/4600/9021/3455/3383/7514/3460/60/3109/4792/896/29108/317/3665/557  
./472/4082/6659/5579/3371/4363

.96883/113/3551/408/10000/9844/5332/2268/4067/6774/2919/58191/10235/4792/2920/5579/564/  
/4641/7846/203068/3725

925/3554/3685/567/4792/7188/3710/4773/5579

1609/9232/3932/3601/3683/3383/1026/7538/9134/7514/4215/5925/1959/3554/3109/567/4792/894

1/3710/3098/3725/87

.36/6868/4312/2353/3455/6774/714/1839/4792/7450/715/6850/5579/3725

3/3383/1026/9134/6890/5925/1643/3109/567/4792/894/7188/953/896/890/7128/317/6850/3665/3

53/7852/6368/5197/7292/6347/3603/3563/1234/51554/3576/3624/9466/8792/85480/654/6372/91  
10095/10376/5287/2353/10627/4609/113146/197259/10109/330/60/9265/9266/4792/302/84617/2  
5579/1326/3725

908/54331/5525/7097/5894/5159/3575/285/7058/5228/3911/3551/10000/4915/9586/3667/4609/3  
76/3675/3694/9636/3908/6932/3107/5525/5894/4853/5159/7058/3105/6772/3911/5933/1857/355  
34527/163049/3661/219749/684/84874/390980/3106/349075/94039/3135/79788/578/284307/5771  
32/3563/4313/2790/3576/83439/7185/8202/3280/1909/2122/2791/182/23462/80326/4855/3675/1

26328/125965/9377/5468/7384/5692/5702/4700/4697/9001/4713/27113/3708/10891/842/5437/47



329/84701/57492/155/126129/353500/4702/55811/23305/6194/4718/4719

4/472/896/890/706/1958/64784/4773/3725

3725

.80/1439/3587/3575/10673/7042/3976/3455/3601/2919/58191/3460/3554/23765/1436/7133/2920/  
!9108/2316/10392/7100/29109/11035/7846/203068/3725/6281

3455/1282/2260/9170/5156/2335/1026/9134/3678/3685/894/7450/1284/896/1969/1436/3918/685/  
1/11211/10000/836/4600/9586/3455/1282/4854/2335/1026/9134/5925/3678/3685/894/7450/2535  
L1/339559/84671/7574/3126/7132/7249/65243/163071/29990/3553/57209/7559/163050/5199/107  
0672/6513/3908/6932/54331/1439/10023/5880/5894/5371/4853/5159/3575/6775/23401/5228/677

'15/4696/4701/10120/84699/8678/5693/5717





/56477/3566

0/2247/3915/3371/3566

/1284/472/896/890/3918/5315/3915/7474/3371/10312

'80/23586/3119/126070/126231/3112/90987/6352/115509/7695/3717/140612/29992/7551/57335/

'2/3911/196883/113/1857/3551/7042/11211/3714/10000/836/9252/6789/5332/83593/4087/4312/







6427/81931/207/7692/51135/342909/9831/7700/84924/9451/84449/55769/7752/5451/146540/71.  
2353/862/4609/3455/6774/867/1282/2260/9170/3601/4854/5900/5156/2335/1026/9134/330/3460





57/25799/3113/80818/5970/208/5500/6347/6891/3134/3115/63934/90649/90321/3133/10793/126  
/5925/1643/10235/3685/4792/894/7188/2535/1284/896/890/1436/317/5366/3918/1906/2247/309







5017/7694/10379/84914/163227/3108/91975/7767/282890/6430/3107/146198/136051/7097/5371/  
1/5579/3915/7474/3725/3566





'10482/9534/718/148156/3105/4939/26152/79088/1616/6772/3551/55900/121274/10000/51427/8





36/9021/3455/80264/162655/6890/330/6672/3460/3678/3109/170960/567/4792/7188/90338/818!







56/54811/389114/317/6850/3665
