# Supplementary material for: The Potential Diagnostic Value of Immune-Related Genes in Interstitial Fibrosis and Tubular Atrophy after Kidney Transplantation
Source: Hindawi journal article supplement (doi:10.1155/2022/7212852), 2022-06-17
Supplement: f1 [file 7212852.f1.zip]

| Ingenuity C          | -log(p-value) | Ratio    | z-score | Molecules                                          |
|----------------------|---------------|----------|---------|----------------------------------------------------|
| Granulocyte          | 1.01E+01      | 7.51E-02 | NaN     | CCL19,CCL4,CCL5,CXCL1,CXCL10,CXCL11,CXCL2,CXCL3    |
| Agranulocyte         | 9.52E+00      | 6.74E-02 | NaN     | CCL19,CCL4,CCL5,CXCL1,CXCL10,CXCL11,CXCL2,CXCL3    |
| Pathogenesis         | 8.94E+00      | 5.56E-01 | NaN     | CCL4,CCL5,CXCL10,CXCL11,CXCL9                      |
| Communication        | 8.00E+00      | 9.38E-02 | NaN     | CCL4,CCL5,CD8A,CXCL10,FCER1G,IGHG2,IGHG3,TNFRSF10A |
| Primary Immune       | 7.56E+00      | 1.40E-01 | NaN     | CD3D,CD8A,IGHG2,IGHG3,IGLL1/IGLL5,IL7R,PTPRC       |
| Differential         | 4.91E+00      | 1.74E-01 | 2       | CCL4,CCL5,CXCL1,LCN2                               |
| Hematopoiesis        | 4.85E+00      | 1.02E-01 | NaN     | CD3D,CD8A,FCER1G,IGHG2,IGHG3                       |
| Systemic Lupus       | 4.81E+00      | 3.93E-02 | NaN     | CD3D,FCER1G,FCGR2B,IGHG2,IGHG3,KLK1,PTPRC,RASD1    |
| Acute Phase          | 4.71E+00      | 4.44E-02 | 2.449   | ALB,APOH,C3,CP,FGB,RASD1,SERPINA3,SERPING1         |
| IL-17A Signaling     | 4.69E+00      | 1.54E-01 | NaN     | CCL5,CXCL1,CXCL10,CXCL11                           |
| Complement           | 4.07E+00      | 1.08E-01 | 1       | C1QB,C1QC,C3,SERPING1                              |
| Role of IL-17        | 3.81E+00      | 9.30E-02 | NaN     | CCL4,CXCL1,CXCL10,CXCL6                            |
| Differential         | 3.73E+00      | 1.67E-01 | NaN     | CCL4,CCL5,CXCL1                                    |
| Role of Hypertension | 3.67E+00      | 5.81E-02 | 2.236   | CCL4,CCL5,CXCL10,ISG20,PYCARD                      |
| Natural Killer       | 3.58E+00      | 3.55E-02 | 2.449   | FCER1G,HCST,KLRB1,KLRC4-KLRK1/KLRK1,RAC2,RASD1     |
| LXR/RXR Activation   | 2.99E+00      | 4.13E-02 | -1.342  | ALB,APOH,C3,LY96,LYZ                               |
| Th1 Pathway          | 2.99E+00      | 4.13E-02 | NaN     | CD3D,CD8A,HLA-DQA2,IL10RA,STAT4                    |
| Dendritic Cell       | 2.95E+00      | 3.26E-02 | 2       | CD1C,FCER1G,FCGR2B,IGHG2,IGHG3,STAT4               |
| Hepatic Fibrosis     | 2.92E+00      | 3.23E-02 | NaN     | CCL5,CXCL9,EGF,IL10RA,LY96,TIMP1                   |
| B Cell Receptor      | 2.92E+00      | 3.23E-02 | NaN     | FCGR2B,IGHG2,IGHG3,PTPRC,RAC2,RASD1                |
| Phospholipase        | 2.82E+00      | 2.63E-02 | NaN     | CD3D,FCER1G,FCGR2B,IGHG2,IGHG3,RAC2,RASD1          |
| Phagosome            | 2.80E+00      | 3.76E-02 | NaN     | FCER1G,FCGR2B,IGHG2,IGHG3,RAC2                     |
| MSP-ROD              | 2.79E+00      | 3.73E-02 | 1.342   | CSF2RB,ELF3,KLK1,RASD1,SFN                         |
| STAT3 Pathway        | 2.77E+00      | 3.70E-02 | NaN     | CSF2RB,EGF,IL10RA,IL7R,RASD1                       |
| Inhibition of        | 2.72E+00      | 7.69E-02 | NaN     | MMP7,TFPI2,TIMP1                                   |
| Allograft Rejection  | 2.67E+00      | 4.65E-02 | NaN     | FCER1G,HLA-DQA2,IGHG2,IGHG3                        |
| Glucocorticoid       | 2.57E+00      | 1.95E-02 | NaN     | CCL5,CD3D,CSF2RB,EGF,G6PC,IL10RA,IL7R,RASD1,SLPI   |
| Role of Pathogen     | 2.53E+00      | 3.25E-02 | 2       | C1QB,C1QC,C3,CCL5,TNFSF13B                         |
| CCR5 Signaling       | 2.52E+00      | 4.26E-02 | NaN     | CCL4,CCL5,CD3D,FCER1G                              |
| Neuroinflammation    | 2.52E+00      | 2.33E-02 | 1.342   | BIRC3,CCL5,CXCL10,GABBR1,GABRP,KLK1,PYCARD         |
| Role of IL-17        | 2.47E+00      | 1.43E-01 | NaN     | CXCL1,CXCL6                                        |
| Autoimmunity         | 2.44E+00      | 6.12E-02 | NaN     | FCER1G,IGHG2,IGHG3                                 |
| T Cell Receptor      | 2.34E+00      | 3.77E-02 | NaN     | CD3D,CD8A,PTPRC,RASD1                              |
| Th1 and Th2          | 2.33E+00      | 2.92E-02 | NaN     | CD3D,CD8A,HLA-DQA2,IL10RA,STAT4                    |
| Erythropoiesis       | 2.31E+00      | 2.89E-02 | 1.342   | BIRC3,CSF2RB,RAC2,RASD1,TNFSF13B                   |
| Role of IL-17        | 2.29E+00      | 5.45E-02 | NaN     | CCL5,CXCL1,CXCL6                                   |
| T Cell Exhaustion    | 2.29E+00      | 2.86E-02 | NaN     | FCER1G,HLA-DQA2,IL10RA,RASD1,STAT4                 |
| NF-κB Signaling      | 2.25E+00      | 2.79E-02 | 1       | EGF,FCER1G,RASD1,TNFRSF17,TNFSF13B                 |
| MSP-ROD              | 2.24E+00      | 3.54E-02 | -1      | HLA-DQA2,KLK1,NFKB1Z,RASD1                         |
| Neuroprotection      | 2.20E+00      | 3.45E-02 | 0       | GZMA,GZMK,KLK1,SERPINA3                            |
| Role of Tissue       | 2.20E+00      | 3.45E-02 | NaN     | CCN1,CXCL1,FGB,RASD1                               |
| PI3K/AKT Signaling   | 2.20E+00      | 2.72E-02 | NaN     | CSF2RB,IL10RA,IL7R,RASD1,SFN                       |
| CD28 Signaling       | 2.14E+00      | 3.31E-02 | NaN     | ARPC1B,CD3D,FCER1G,PTPRC                           |
| Clathrin-mediated    | 2.11E+00      | 2.59E-02 | NaN     | ALB,ARPC1B,EGF,LYZ,UBD                             |
| FXR/RXR Activation   | 2.08E+00      | 3.17E-02 | NaN     | ALB,APOH,C3,G6PC                                   |
| ERK5 Signaling       | 1.97E+00      | 4.17E-02 | NaN     | EGF,RASD1,SFN                                      |
| T Helper Cell        | 1.95E+00      | 4.11E-02 | NaN     | FCER1G,IL10RA,STAT4                                |
| Glioma Invasion      | 1.95E+00      | 4.11E-02 | NaN     | RAC2,RASD1,TIMP1                                   |
| PI3K Signaling       | 1.94E+00      | 2.90E-02 | NaN     | C3,FCGR2B,PTPRC,RASD1                              |
| Lipid Antigens       | 1.94E+00      | 7.69E-02 | NaN     | CD1C,FCER1G                                        |
| Role of Macrophage   | 1.85E+00      | 3.75E-02 | NaN     | CCL5,CXCL10,RASD1                                  |
| Chemokine            | 1.85E+00      | 3.75E-02 | NaN     | CCL4,CCL5,RASD1                                    |
| Actin Nucleation     | 1.83E+00      | 3.70E-02 | NaN     | ARPC1B,RAC2,RASD1                                  |
| Role of Macrophage   | 1.83E+00      | 1.91E-02 | NaN     | CCL5,IGHG2,IGHG3,RASD1,SOST,TNFSF13B               |
| PKC Signaling        | 1.77E+00      | 2.58E-02 | NaN     | CD3D,FCER1G,RAC2,RASD1                             |
| CTLA4 Signaling      | 1.73E+00      | 3.37E-02 | NaN     | CD3D,CD8A,FCER1G                                   |

|              |          |          |       |                                              |
|--------------|----------|----------|-------|----------------------------------------------|
| Crosstalk b  | 1.73E+00 | 3.37E-02 | NaN   | CD69,CSF2RB,KLRC4-KLRK1/KLRK1                |
| Cytotoxic T  | 1.71E+00 | 5.88E-02 | NaN   | CD3D,FCER1G                                  |
| Altered T C  | 1.71E+00 | 3.33E-02 | NaN   | FCER1G,TNFRSF17,TNFSF13B                     |
| OX40 Sign    | 1.71E+00 | 3.33E-02 | NaN   | CD3D,FCER1G,HLA-DQA2                         |
| B Cell Deve  | 1.66E+00 | 5.56E-02 | NaN   | IL7R,PTPRC                                   |
| IL-17A Sig   | 1.66E+00 | 5.56E-02 | NaN   | LCN2,NFKBIZ                                  |
| GABA Rec     | 1.65E+00 | 3.16E-02 | NaN   | GABBR1,GABRP,UBD                             |
| Bladder Ca   | 1.63E+00 | 3.09E-02 | NaN   | EGF,MMP7,RASD1                               |
| Antiprolife  | 1.60E+00 | 5.13E-02 | NaN   | CD3D,FCER1G                                  |
| Antigen Pr   | 1.60E+00 | 5.13E-02 | NaN   | HLA-DQA2,NLRC5                               |
| Cdc42 Sigr   | 1.59E+00 | 2.27E-02 | NaN   | ARPC1B,CD3D,FCER1G,HLA-DQA2                  |
| SAPK/JNK     | 1.57E+00 | 2.94E-02 | NaN   | FCER1G,RAC2,RASD1                            |
| B Cell Activ | 1.56E+00 | 4.88E-02 | NaN   | TNFRSF17,TNFSF13B                            |
| Role of NF   | 1.55E+00 | 2.21E-02 | NaN   | CD3D,FCER1G,FCGR2B,RASD1                     |
| IGF-1 Sign   | 1.55E+00 | 2.88E-02 | NaN   | CCN1,RASD1,SFN                               |
| Intrinsic Pr | 1.54E+00 | 4.76E-02 | NaN   | FGB,KLK1                                     |
| Telomeras    | 1.52E+00 | 2.80E-02 | NaN   | EGF,ELF3,RASD1                               |
| Systemic L   | 1.52E+00 | 1.82E-02 | 1.342 | FCGR2B,ISG20,RAC2,RASD1,TNFSF13B             |
| IL-17 Sign   | 1.51E+00 | 2.14E-02 | 2     | CXCL1,LCN2,RASD1,TNFSF13B                    |
| Ephrin Rec   | 1.49E+00 | 2.12E-02 | NaN   | ARPC1B,EGF,RAC2,RASD1                        |
| iCOS-iCOS    | 1.48E+00 | 2.70E-02 | NaN   | CD3D,FCER1G,PTPRC                            |
| Breast Can   | 1.47E+00 | 1.36E-02 | 0.707 | ACKR1,ADGRV1,EGF,GABBR1,GPR171,GPR183,RAC2,R |
| Leukocyte    | 1.47E+00 | 2.07E-02 | 0     | ARHGAP9,MMP7,RAC2,TIMP1                      |
| HER-2 Sigr   | 1.46E+00 | 2.06E-02 | 1     | EGF,ELF3,FCER1G,RASD1                        |
| Fc Epsilon   | 1.42E+00 | 2.56E-02 | NaN   | FCER1G,RAC2,RASD1                            |
| IL-8 Signal  | 1.42E+00 | 2.00E-02 | NaN   | CXCL1,EGF,RAC2,RASD1                         |
| Airway Pat   | 1.41E+00 | 2.54E-02 | NaN   | CXCL1,LCN2,TNFSF13B                          |
| MSP-RON      | 1.28E+00 | 3.45E-02 | NaN   | CSF2RB,KLK1                                  |
| IL-12 Sign   | 1.28E+00 | 2.26E-02 | NaN   | ALB,LYZ,STAT4                                |
| Th2 Pathw    | 1.26E+00 | 2.21E-02 | NaN   | CD3D,HLA-DQA2,STAT4                          |
| SPINK1 Pa    | 1.26E+00 | 3.33E-02 | NaN   | CPA3,KLK1                                    |
| Actin Cyto   | 1.25E+00 | 1.76E-02 | NaN   | ARPC1B,EGF,RAC2,RASD1                        |
| Autophagy    | 1.25E+00 | 3.28E-02 | NaN   | CTSS,CTSV                                    |
| Ovarian Ca   | 1.24E+00 | 2.16E-02 | NaN   | EGF,MMP7,RASD1                               |
| Hereditary   | 1.23E+00 | 2.14E-02 | NaN   | RASD1,SFN,UBD                                |
| Systemic L   | 1.22E+00 | 1.50E-02 | 1     | CD3D,FCER1G,HLA-DQA2,RAC2,RASD1              |
| Role of PI3  | 1.21E+00 | 3.12E-02 | NaN   | CCL5,PLAC8                                   |
| PXR/RXR A    | 1.20E+00 | 3.08E-02 | NaN   | CYP3A7,G6PC                                  |
| IL-17A Sig   | 1.20E+00 | 3.08E-02 | NaN   | CXCL1,CXCL6                                  |
| Calcium-in   | 1.19E+00 | 3.03E-02 | NaN   | CD3D,FCER1G                                  |
| Nur77 Sigr   | 1.16E+00 | 2.94E-02 | NaN   | CD3D,FCER1G                                  |
| Role of JAK  | 1.15E+00 | 2.90E-02 | NaN   | IL7R,RASD1                                   |
| SPINK1 Ge    | 1.15E+00 | 2.90E-02 | NaN   | GZMA,RASD1                                   |
| Epithelial A | 1.14E+00 | 1.97E-02 | NaN   | ARPC1B,EGF,RASD1                             |
| IL-10 Sign   | 1.14E+00 | 2.86E-02 | NaN   | FCGR2B,IL10RA                                |
| Agrin Inter  | 1.14E+00 | 2.86E-02 | NaN   | RAC2,RASD1                                   |
| GM-CSF Si    | 1.14E+00 | 2.86E-02 | NaN   | CSF2RB,RASD1                                 |
| Colorectal   | 1.12E+00 | 1.58E-02 | NaN   | EGF,MMP7,RAC2,RASD1                          |
| Caveolar-r   | 1.11E+00 | 2.74E-02 | NaN   | ALB,EGF                                      |
| Non-Small    | 1.11E+00 | 2.74E-02 | NaN   | EGF,RASD1                                    |
| Regulation   | 1.10E+00 | 2.70E-02 | NaN   | EGF,RASD1                                    |
| TREM1 Sig    | 1.09E+00 | 2.67E-02 | NaN   | FCGR2B,NLRC5                                 |
| FcRIIB Si    | 1.09E+00 | 2.67E-02 | NaN   | FCGR2B,RASD1                                 |
| Role of MA   | 1.09E+00 | 2.67E-02 | NaN   | CCL5,CXCL10                                  |
| Toll-like R  | 1.08E+00 | 2.63E-02 | NaN   | LY96,UBD                                     |
| Macropino    | 1.08E+00 | 2.63E-02 | NaN   | EGF,RASD1                                    |
| CREB Sign    | 1.08E+00 | 1.17E-02 | 1.134 | ACKR1,ADGRV1,EGF,GABBR1,GPR171,GPR183,RASD1  |
| HMGB1 Sig    | 1.06E+00 | 1.82E-02 | NaN   | RAC2,RASD1,TNFSF13B                          |

|              |          |          |     |                                   |
|--------------|----------|----------|-----|-----------------------------------|
| Glioblastor  | 1.06E+00 | 1.82E-02 | NaN | EGF,RAC2,RASD1                    |
| VDR/RXR /    | 1.06E+00 | 2.56E-02 | NaN | CCL5,CXCL10                       |
| IL-3 Signal  | 1.05E+00 | 2.53E-02 | NaN | CSF2RB,RASD1                      |
| FLT3 Signa   | 1.04E+00 | 2.50E-02 | NaN | RASD1,STAT4                       |
| Renal Cell   | 1.04E+00 | 2.50E-02 | NaN | RASD1,UBD                         |
| JAK/Stat Si  | 1.04E+00 | 2.50E-02 | NaN | RASD1,STAT4                       |
| Extrinsic Pr | 1.02E+00 | 6.25E-02 | NaN | FGB                               |
| Tec Kinase   | 1.01E+00 | 1.73E-02 | NaN | FCER1G,RAC2,STAT4                 |
| Wnt/尾-ca     | 1.01E+00 | 1.73E-02 | NaN | MMP7,SOX9,UBD                     |
| Tumor Mic    | 1.00E+00 | 1.70E-02 | NaN | EGF,MMP7,RASD1                    |
| FAT10 Sigr   | 9.67E-01 | 5.56E-02 | NaN | UBD                               |
| Acute Mye    | 9.63E-01 | 2.25E-02 | NaN | CSF2RB,RASD1                      |
| Regulation   | 9.55E-01 | 2.22E-02 | NaN | CD3D,RASD1                        |
| Granzyme     | 9.47E-01 | 5.26E-02 | NaN | GZMA                              |
| DNA dama     | 9.47E-01 | 5.26E-02 | NaN | SFN                               |
| Th17 Activ   | 9.47E-01 | 2.20E-02 | NaN | FCER1G,STAT4                      |
| Regulation   | 9.36E-01 | 1.60E-02 | NaN | EGF,RASD1,TNFSF13B                |
| Production   | 9.28E-01 | 1.59E-02 | NaN | ALB,LYZ,RAC2                      |
| RhoGDI Sig   | 9.28E-01 | 1.59E-02 | NaN | ARHGAP9,ARPC1B,RAC2               |
| Fc纬 Recep    | 9.24E-01 | 2.13E-02 | NaN | ARPC1B,RAC2                       |
| ErbB Signa   | 9.24E-01 | 2.13E-02 | NaN | EGF,RASD1                         |
| The Visual   | 9.24E-01 | 5.00E-02 | NaN | RDH12                             |
| Inflammas    | 9.24E-01 | 5.00E-02 | NaN | PYCARD                            |
| VEGF Signa   | 8.89E-01 | 2.02E-02 | NaN | RASD1,SFN                         |
| Apoptosis    | 8.79E-01 | 2.00E-02 | NaN | BIRC3,RASD1                       |
| Virus Entry  | 8.66E-01 | 1.96E-02 | NaN | RAC2,RASD1                        |
| ERK/MAPK     | 8.66E-01 | 1.49E-02 | NaN | ELF3,RAC2,RASD1                   |
| Regulation   | 8.60E-01 | 1.94E-02 | NaN | ARPC1B,RAC2                       |
| Sumoylatic   | 8.60E-01 | 1.94E-02 | NaN | ISG20,RAC2                        |
| HIF1伪 Sig    | 8.54E-01 | 1.46E-02 | NaN | EGF,MMP7,RASD1                    |
| FAK Signal   | 8.54E-01 | 1.92E-02 | NaN | EGF,RASD1                         |
| Neuregulir   | 8.48E-01 | 1.90E-02 | NaN | EGF,RASD1                         |
| Thrombin :   | 8.39E-01 | 1.44E-02 | NaN | EGF,RAC2,RASD1                    |
| Bupropion    | 8.36E-01 | 4.00E-02 | NaN | CYP3A7                            |
| Integrin Sig | 8.18E-01 | 1.41E-02 | NaN | ARPC1B,RAC2,RASD1                 |
| Glioma Sig   | 8.15E-01 | 1.82E-02 | NaN | EGF,RASD1                         |
| Type I Diak  | 8.10E-01 | 1.80E-02 | NaN | CD3D,FCER1G                       |
| Endocanna    | 7.85E-01 | 1.74E-02 | NaN | RAC2,RASD1                        |
| fMLP Signa   | 7.80E-01 | 1.72E-02 | NaN | ARPC1B,RASD1                      |
| Renin-Ang    | 7.67E-01 | 1.69E-02 | NaN | CCL5,RASD1                        |
| Cholecystc   | 7.62E-01 | 1.68E-02 | NaN | RAC2,RASD1                        |
| TNFR2 Sign   | 7.62E-01 | 3.33E-02 | NaN | BIRC3                             |
| HGF Signa    | 7.57E-01 | 1.67E-02 | NaN | ELF3,RASD1                        |
| Rac Signali  | 7.50E-01 | 1.65E-02 | NaN | ARPC1B,RASD1                      |
| Acetone D    | 7.50E-01 | 3.23E-02 | NaN | CYP3A7                            |
| Inhibition c | 7.45E-01 | 1.64E-02 | NaN | SFN,TNFSF13B                      |
| RhoA Signa   | 7.40E-01 | 1.63E-02 | NaN | ARHGAP9,ARPC1B                    |
| G伪i Signa    | 7.28E-01 | 1.60E-02 | NaN | GABBR1,RASD1                      |
| GP6 Signal   | 7.28E-01 | 1.60E-02 | NaN | FCER1G,FGB                        |
| 14-3-3-me    | 7.19E-01 | 1.57E-02 | NaN | RASD1,SFN                         |
| Atheroscle   | 7.19E-01 | 1.57E-02 | NaN | ALB,LYZ                           |
| MIF-medic    | 7.12E-01 | 2.94E-02 | NaN | LY96                              |
| Retinoate f  | 7.12E-01 | 2.94E-02 | NaN | RDH12                             |
| p70S6K Sig   | 7.08E-01 | 1.55E-02 | NaN | RASD1,SFN                         |
| Coagulatio   | 7.01E-01 | 2.86E-02 | NaN | FGB                               |
| TWEAK Sig    | 7.01E-01 | 2.86E-02 | NaN | BIRC3                             |
| Axonal Gui   | 6.93E-01 | 1.01E-02 | NaN | ARPC1B,EGF,MMP7,RAC2,RASD1        |
| Cardiac Hy   | 6.86E-01 | 1.01E-02 | NaN | CSF2RB,IL10RA,IL7R,RASD1,TNFSF13B |

|             |          |          |     |                         |
|-------------|----------|----------|-----|-------------------------|
| PTEN Signa  | 6.74E-01 | 1.47E-02 | NaN | RAC2,RASD1              |
| Iron home   | 6.70E-01 | 1.46E-02 | NaN | CP,EGF                  |
| Hepatic Fik | 6.64E-01 | 1.06E-02 |     | 2 CCL5,RAC2,RASD1,TIMP1 |
| April Medi  | 6.50E-01 | 2.50E-02 | NaN | TNFRSF17                |
| MIF Regul   | 6.31E-01 | 2.38E-02 | NaN | LY96                    |
| Estrogen B  | 6.31E-01 | 2.38E-02 | NaN | CYP3A7                  |
| Oncostatin  | 6.22E-01 | 2.33E-02 | NaN | RASD1                   |
| Retinol Bio | 6.14E-01 | 2.27E-02 | NaN | RDH12                   |
| IL-23 Signa | 6.14E-01 | 2.27E-02 | NaN | STAT4                   |
| Coronaviru  | 6.13E-01 | 1.33E-02 | NaN | CCL5,PYCARD             |
| Phagosom    | 6.07E-01 | 1.32E-02 | NaN | CTSS,CTSV               |
| iNOS Signa  | 6.06E-01 | 2.22E-02 | NaN | LY96                    |
| FAT10 Can   | 5.97E-01 | 2.17E-02 | NaN | UBD                     |
| nNOS Sign   | 5.88E-01 | 2.13E-02 | NaN | RASD1                   |
| Necroptos   | 5.83E-01 | 1.27E-02 | NaN | BIRC3,PYCARD            |
| Graft-versu | 5.82E-01 | 2.08E-02 | NaN | FCER1G                  |
| Cell Cycle: | 5.73E-01 | 2.04E-02 | NaN | SFN                     |
| Melanoma    | 5.65E-01 | 2.00E-02 | NaN | RASD1                   |
| TNFR1 Sigr  | 5.65E-01 | 2.00E-02 | NaN | BIRC3                   |
| UVC-Induc   | 5.59E-01 | 1.96E-02 | NaN | RASD1                   |
| CXCR4 Sig   | 5.47E-01 | 1.20E-02 | NaN | RAC2,RASD1              |
| Lymphoto    | 5.45E-01 | 1.89E-02 | NaN | CXCL1                   |
| Germ Cell-  | 5.32E-01 | 1.17E-02 | NaN | RAC2,RASD1              |
| EGF Signal  | 5.32E-01 | 1.82E-02 | NaN | EGF                     |
| CNTF Sign   | 5.19E-01 | 1.75E-02 | NaN | RASD1                   |
| Nicotine D  | 5.19E-01 | 1.75E-02 | NaN | CYP3A7                  |
| Cancer Dru  | 5.11E-01 | 1.72E-02 | NaN | RASD1                   |
| Semaphori   | 5.00E-01 | 1.67E-02 | NaN | RAC2                    |
| Maturity O  | 5.00E-01 | 1.67E-02 | NaN | APOH                    |
| Endometri   | 5.00E-01 | 1.67E-02 | NaN | RASD1                   |
| Melatonin   | 5.00E-01 | 1.67E-02 | NaN | CYP3A7                  |
| Induction c | 4.93E-01 | 1.64E-02 | NaN | BIRC3                   |
| IL-2 Signal | 4.93E-01 | 1.64E-02 | NaN | RASD1                   |
| Hepatic Ch  | 4.84E-01 | 1.08E-02 | NaN | LY96,TNFSF13B           |
| Thrombop    | 4.83E-01 | 1.59E-02 | NaN | RASD1                   |
| NRF2-mec    | 4.75E-01 | 1.06E-02 | NaN | MAFF,RASD1              |
| ErbB2-Erbl  | 4.71E-01 | 1.54E-02 | NaN | RASD1                   |
| Netrin Sigr | 4.71E-01 | 1.54E-02 | NaN | RAC2                    |
| Nicotine D  | 4.71E-01 | 1.54E-02 | NaN | CYP3A7                  |
| Superpath   | 4.71E-01 | 1.54E-02 | NaN | CYP3A7                  |
| Pyridoxal 5 | 4.66E-01 | 1.52E-02 | NaN | G6PC                    |
| Regulation  | 4.66E-01 | 1.04E-02 | NaN | EGF,RASD1               |
| Estrogen R  | 4.66E-01 | 9.15E-03 | NaN | EGF,MMP7,RASD1          |
| ErbB4 Sign  | 4.61E-01 | 1.49E-02 | NaN | RASD1                   |
| RAR Activa  | 4.60E-01 | 1.03E-02 | NaN | CSF2RB,RDH12            |
| Remodelin   | 4.56E-01 | 1.47E-02 | NaN | ARPC1B                  |
| Adrenome    | 4.51E-01 | 1.02E-02 | NaN | C3,RASD1                |
| Gap Juncti  | 4.49E-01 | 1.01E-02 | NaN | EGF,RASD1               |
| Ephrin B Si | 4.35E-01 | 1.39E-02 | NaN | RAC2                    |
| IL-15 Signa | 4.23E-01 | 1.33E-02 | NaN | RASD1                   |
| Angiopoie   | 4.23E-01 | 1.33E-02 | NaN | RASD1                   |
| Estrogen-[  | 4.23E-01 | 1.33E-02 | NaN | RASD1                   |
| NF-魏B Ac    | 4.18E-01 | 1.32E-02 | NaN | RASD1                   |
| GDNF Fam    | 4.18E-01 | 1.32E-02 | NaN | RASD1                   |
| Neurotrop   | 4.18E-01 | 1.32E-02 | NaN | RASD1                   |
| mTOR Sigr   | 4.17E-01 | 9.52E-03 | NaN | RAC2,RASD1              |
| Antiprolife | 4.13E-01 | 1.30E-02 | NaN | RASD1                   |
| IL-7 Signal | 4.09E-01 | 1.28E-02 | NaN | IL7R                    |

|              |          |          |     |                  |
|--------------|----------|----------|-----|------------------|
| Thyroid Ca   | 4.05E-01 | 1.27E-02 | NaN | RASD1            |
| BEX2 Signa   | 4.05E-01 | 1.27E-02 | NaN | KLK1             |
| Role of Os   | 3.97E-01 | 9.17E-03 | NaN | BIRC3,SOST       |
| Prolactin S  | 3.96E-01 | 1.23E-02 | NaN | RASD1            |
| Osteoarthr   | 3.93E-01 | 9.09E-03 | NaN | ELF3,SOX9        |
| PEDF Signa   | 3.91E-01 | 1.22E-02 | NaN | RASD1            |
| LPS-stimul   | 3.88E-01 | 1.20E-02 | NaN | RASD1            |
| TR/RXR Ac    | 3.84E-01 | 1.19E-02 | NaN | G6PC             |
| VEGF Fami    | 3.84E-01 | 1.19E-02 | NaN | RASD1            |
| LPS/IL-1 M   | 3.81E-01 | 8.89E-03 | NaN | CYP3A7,LY96      |
| HIPPO sigr   | 3.80E-01 | 1.18E-02 | NaN | SFN              |
| IL-4 Signal  | 3.80E-01 | 1.18E-02 | NaN | RASD1            |
| BMP signa    | 3.80E-01 | 1.18E-02 | NaN | RASD1            |
| PDGF Sign    | 3.77E-01 | 1.16E-02 | NaN | RASD1            |
| Ceramide S   | 3.69E-01 | 1.14E-02 | NaN | RASD1            |
| RANK Sign    | 3.66E-01 | 1.12E-02 | NaN | BIRC3            |
| Prostate C   | 3.58E-01 | 1.10E-02 | NaN | RASD1            |
| Death Rec    | 3.55E-01 | 1.09E-02 | NaN | BIRC3            |
| Huntingtor   | 3.51E-01 | 8.37E-03 | NaN | EGF,UBD          |
| Cardiac Hy   | 3.48E-01 | 8.33E-03 | NaN | RAC2,RASD1       |
| Melanocyt    | 3.48E-01 | 1.06E-02 | NaN | RASD1            |
| 伪-Adrene     | 3.44E-01 | 1.05E-02 | NaN | RASD1            |
| TGF-尾 Sig    | 3.41E-01 | 1.04E-02 | NaN | RASD1            |
| Amyotroph    | 3.37E-01 | 1.03E-02 | NaN | BIRC3            |
| p53 Signali  | 3.34E-01 | 1.02E-02 | NaN | SFN              |
| Salvage Pa   | 3.34E-01 | 1.02E-02 | NaN | G6PC             |
| UVA-Induc    | 3.34E-01 | 1.02E-02 | NaN | RASD1            |
| Opioid Sig   | 3.34E-01 | 8.10E-03 | NaN | RAC2,RASD1       |
| Molecular    | 3.33E-01 | 7.50E-03 | NaN | BIRC3,RAC2,RASD1 |
| Signaling k  | 3.22E-01 | 7.91E-03 | NaN | ARPC1B,RAC2      |
| Chronic M    | 3.19E-01 | 9.71E-03 | NaN | RASD1            |
| Mouse Em     | 3.19E-01 | 9.71E-03 | NaN | RASD1            |
| PPAR Signa   | 3.13E-01 | 9.52E-03 | NaN | RASD1            |
| PAK Signal   | 3.10E-01 | 9.43E-03 | NaN | RASD1            |
| PD-1, PD-    | 3.10E-01 | 9.43E-03 | NaN | HLA-DQA2         |
| CDK5 Sign    | 3.05E-01 | 9.26E-03 | NaN | RASD1            |
| Paxillin Sig | 3.05E-01 | 9.26E-03 | NaN | RASD1            |
| Pancreatic   | 3.02E-01 | 9.17E-03 | NaN | EGF              |
| Antioxidan   | 3.02E-01 | 9.17E-03 | NaN | CSF2RB           |
| Role of MA   | 2.99E-01 | 9.09E-03 | NaN | RASD1            |
| NGF Signa    | 2.88E-01 | 8.77E-03 | NaN | RASD1            |
| Protein Ub   | 2.87E-01 | 7.33E-03 | NaN | BIRC3,UBD        |
| G-Protein    | 2.86E-01 | 7.30E-03 | NaN | GABBR1,RASD1     |
| Apelin End   | 2.86E-01 | 8.70E-03 | NaN | RASD1            |
| Senescenc    | 2.84E-01 | 7.27E-03 | NaN | ELF3,RASD1       |
| Sphingosir   | 2.81E-01 | 8.55E-03 | NaN | RAC2             |
| Role of PKI  | 2.78E-01 | 8.47E-03 | NaN | PYCARD           |
| Role of NA   | 2.76E-01 | 8.40E-03 | NaN | RASD1            |
| Reelin Sigr  | 2.68E-01 | 8.20E-03 | NaN | ARPC1B           |
| G Beta Gar   | 2.68E-01 | 8.20E-03 | NaN | RASD1            |
| Xenobiotic   | 2.65E-01 | 6.97E-03 | NaN | CYP3A7,RASD1     |
| CCR3 Sign    | 2.64E-01 | 8.06E-03 | NaN | RASD1            |
| IL-6 Signal  | 2.59E-01 | 7.94E-03 | NaN | RASD1            |
| Ferroptosis  | 2.59E-01 | 7.94E-03 | NaN | RASD1            |
| P2Y Purige   | 2.57E-01 | 7.87E-03 | NaN | RASD1            |
| Synaptic L   | 2.53E-01 | 7.75E-03 | NaN | RASD1            |
| White Adip   | 2.53E-01 | 7.75E-03 | NaN | FCER1G           |
| G伪12/13 :    | 2.48E-01 | 7.63E-03 | NaN | RASD1            |

|              |          |          |     |              |
|--------------|----------|----------|-----|--------------|
| Adipogene    | 2.42E-01 | 7.46E-03 | NaN | SOX9         |
| Insulin Rec  | 2.32E-01 | 7.19E-03 | NaN | RASD1        |
| Semaphori    | 2.32E-01 | 7.19E-03 | NaN | VCAN         |
| Synaptoge    | 2.31E-01 | 6.41E-03 | NaN | ARPC1B,RASD1 |
| D-myo-inc    | 2.26E-01 | 7.04E-03 | NaN | PTPRC        |
| D-myo-inc    | 2.26E-01 | 7.04E-03 | NaN | PTPRC        |
| Xenobiotic   | 2.24E-01 | 6.99E-03 | NaN | RASD1        |
| 3-phosphc    | 2.01E-01 | 6.41E-03 | NaN | PTPRC        |
| D-myo-inc    | 2.00E-01 | 6.37E-03 | NaN | PTPRC        |
| G伪q Signa    | 2.00E-01 | 6.37E-03 | NaN | RAC2         |
| Synaptic Lc  | 0.00E+00 | 5.29E-03 | NaN | RASD1        |
| PPAR伪/R)     | 0.00E+00 | 5.24E-03 | NaN | RASD1        |
| Endothelin   | 0.00E+00 | 5.32E-03 | NaN | RASD1        |
| GNRH Sigr    | 0.00E+00 | 5.78E-03 | NaN | RASD1        |
| ILK Signalir | 0.00E+00 | 5.26E-03 | NaN | RAC2         |
| EIF2 Signal  | 0.00E+00 | 4.46E-03 | NaN | RASD1        |
| Protein Kin  | 0.00E+00 | 5.00E-03 | NaN | PTPRC,SFN    |
| Regulation   | 0.00E+00 | 6.02E-03 | NaN | RASD1        |
| Role of NF   | 0.00E+00 | 4.67E-03 | NaN | RASD1        |
| Sertoli Cell | 0.00E+00 | 5.15E-03 | NaN | RASD1        |
| Superpath    | 0.00E+00 | 5.03E-03 | NaN | PTPRC        |
| 3-phosphc    | 0.00E+00 | 6.02E-03 | NaN | PTPRC        |
| cAMP-mec     | 0.00E+00 | 4.37E-03 | NaN | GABBR1       |
| HOTAIR Re    | 0.00E+00 | 6.25E-03 | NaN | MMP7         |
| Xenobiotic   | 0.00E+00 | 5.29E-03 | NaN | CYP3A7       |
| Xenobiotic   | 0.00E+00 | 5.21E-03 | NaN | CYP3A7       |
| Insulin Sec  | 0.00E+00 | 4.10E-03 | NaN | STAT4        |

6,CXCL9,MMP7,SELL,XCL1,XCL2  
6,CXCL9,MMP7,SELL,XCL1,XCL2

3F17,TNFSF13B

31,TNFSF13B

1,STAT4

ASD1
