# Supplementary material for: The Potential Diagnostic Value of Immune-Related Genes in Interstitial Fibrosis and Tubular Atrophy after Kidney Transplantation
Source: Hindawi journal article supplement (doi:10.1155/2022/7212852), 2022-06-17
Supplement: f1 [file 7212852.f1.zip]

| ID       | Description  | setSize | enrichment | NES      | pvalue   | p.adjust | qvalues | rank |
|----------|--------------|---------|------------|----------|----------|----------|---------|------|
| hsa05200 | Pathways i   | 492     | 0.288704   | 1.63771  | 0.001416 | 0.007052 | 0.00362 | 4319 |
| hsa05168 | Herpes sim   | 427     | 0.407695   | 2.285798 | 0.001435 | 0.007052 | 0.00362 | 5578 |
| hsa04010 | MAPK sign    | 274     | 0.295127   | 1.57405  | 0.001546 | 0.007052 | 0.00362 | 3189 |
| hsa04060 | Cytokine-c   | 249     | 0.459573   | 2.434882 | 0.00155  | 0.007052 | 0.00362 | 3361 |
| hsa05132 | Salmonella   | 244     | 0.416601   | 2.193588 | 0.001577 | 0.007052 | 0.00362 | 4389 |
| hsa04510 | Focal adhe   | 196     | 0.348798   | 1.786559 | 0.0016   | 0.007052 | 0.00362 | 3725 |
| hsa05166 | Human T-c    | 211     | 0.491889   | 2.546843 | 0.001603 | 0.007052 | 0.00362 | 4283 |
| hsa05205 | Proteoglyc   | 199     | 0.336046   | 1.725415 | 0.001605 | 0.007052 | 0.00362 | 3551 |
| hsa05131 | Shigellosis  | 209     | 0.354854   | 1.835231 | 0.001608 | 0.007052 | 0.00362 | 4251 |
| hsa05171 | Coronaviru   | 195     | 0.536612   | 2.741961 | 0.001608 | 0.007052 | 0.00362 | 3407 |
| hsa05163 | Human cyt    | 210     | 0.379942   | 1.964246 | 0.00161  | 0.007052 | 0.00362 | 4283 |
| hsa05170 | Human im     | 191     | 0.373705   | 1.909919 | 0.001616 | 0.007052 | 0.00362 | 3171 |
| hsa05169 | Epstein-Ba   | 194     | 0.513406   | 2.619817 | 0.001626 | 0.007052 | 0.00362 | 4210 |
| hsa05164 | Influenza A  | 162     | 0.488962   | 2.42679  | 0.001629 | 0.007052 | 0.00362 | 2410 |
| hsa04810 | Regulation   | 204     | 0.302854   | 1.55813  | 0.001634 | 0.007052 | 0.00362 | 2304 |
| hsa05130 | Pathogenic   | 184     | 0.399709   | 2.019545 | 0.001637 | 0.007052 | 0.00362 | 4495 |
| hsa04621 | NOD-like r   | 161     | 0.498645   | 2.470922 | 0.001639 | 0.007052 | 0.00362 | 3084 |
| hsa05203 | Viral carcin | 161     | 0.408156   | 2.022524 | 0.001639 | 0.007052 | 0.00362 | 4288 |
| hsa03013 | RNA transp   | 152     | 0.357822   | 1.767416 | 0.001642 | 0.007052 | 0.00362 | 5638 |
| hsa04514 | Cell adhesi  | 136     | 0.519878   | 2.531358 | 0.001645 | 0.007052 | 0.00362 | 1835 |
| hsa05161 | Hepatitis B  | 157     | 0.405473   | 2.00926  | 0.001645 | 0.007052 | 0.00362 | 3112 |
| hsa04630 | JAK-STAT     | 139     | 0.397912   | 1.940622 | 0.00165  | 0.007052 | 0.00362 | 3551 |
| hsa05135 | Yersinia inf | 130     | 0.433014   | 2.09059  | 0.001653 | 0.007052 | 0.00362 | 4238 |
| hsa05152 | Tuberculos   | 171     | 0.513311   | 2.559124 | 0.001653 | 0.007052 | 0.00362 | 1840 |
| hsa04062 | Chemokine    | 177     | 0.472258   | 2.367425 | 0.001656 | 0.007052 | 0.00362 | 3147 |
| hsa04650 | Natural kill | 119     | 0.522944   | 2.475983 | 0.001658 | 0.007052 | 0.00362 | 2746 |
| hsa05206 | MicroRNA     | 163     | 0.370581   | 1.834216 | 0.001658 | 0.007052 | 0.00362 | 3153 |
| hsa04110 | Cell cycle   | 117     | 0.400527   | 1.885877 | 0.001664 | 0.007052 | 0.00362 | 5000 |
| hsa04145 | Phagosome    | 144     | 0.569409   | 2.783252 | 0.001664 | 0.007052 | 0.00362 | 2458 |
| hsa04210 | Apoptosis    | 129     | 0.411661   | 1.979463 | 0.001664 | 0.007052 | 0.00362 | 3582 |
| hsa04218 | Cellular sei | 148     | 0.350543   | 1.721002 | 0.001667 | 0.007052 | 0.00362 | 3153 |
| hsa05167 | Kaposi sarc  | 175     | 0.43195    | 2.158284 | 0.001669 | 0.007052 | 0.00362 | 4271 |
| hsa03040 | Spliceosom   | 128     | 0.349741   | 1.679384 | 0.001672 | 0.007052 | 0.00362 | 6438 |
| hsa04217 | Necroptos    | 124     | 0.399959   | 1.910349 | 0.001672 | 0.007052 | 0.00362 | 2974 |
| hsa04380 | Osteoclast   | 122     | 0.561521   | 2.670978 | 0.001672 | 0.007052 | 0.00362 | 3582 |
| hsa05162 | Measles      | 132     | 0.490758   | 2.373564 | 0.001672 | 0.007052 | 0.00362 | 3084 |
| hsa04610 | Compleme     | 77      | 0.540288   | 2.374447 | 0.001675 | 0.007052 | 0.00362 | 1374 |
| hsa04612 | Antigen pr   | 77      | 0.639973   | 2.812539 | 0.001675 | 0.007052 | 0.00362 | 2532 |
| hsa05202 | Transcripti  | 158     | 0.423478   | 2.091156 | 0.001675 | 0.007052 | 0.00362 | 2771 |
| hsa05133 | Pertussis    | 71      | 0.636801   | 2.751419 | 0.001684 | 0.007052 | 0.00362 | 1476 |
| hsa04668 | TNF signal   | 108     | 0.519188   | 2.412559 | 0.001695 | 0.007052 | 0.00362 | 3171 |
| hsa05140 | Leishmania   | 74      | 0.705174   | 3.066181 | 0.001695 | 0.007052 | 0.00362 | 2539 |
| hsa05145 | Toxoplasma   | 108     | 0.516344   | 2.399344 | 0.001695 | 0.007052 | 0.00362 | 3331 |
| hsa04657 | IL-17 signa  | 86      | 0.43611    | 1.947457 | 0.001698 | 0.007052 | 0.00362 | 3084 |
| hsa04658 | Th1 and Th   | 86      | 0.57906    | 2.585802 | 0.001698 | 0.007052 | 0.00362 | 2146 |
| hsa05134 | Legionello   | 57      | 0.572679   | 2.371016 | 0.001698 | 0.007052 | 0.00362 | 3215 |
| hsa04061 | Viral prote  | 87      | 0.630103   | 2.81618  | 0.001701 | 0.007052 | 0.00362 | 2042 |
| hsa05235 | PD-L1 exp    | 87      | 0.512585   | 2.290944 | 0.001701 | 0.007052 | 0.00362 | 3084 |
| hsa05414 | Dilated car  | 87      | 0.392346   | 1.753551 | 0.001701 | 0.007052 | 0.00362 | 4677 |
| hsa04670 | Leukocyte    | 105     | 0.42182    | 1.948764 | 0.001704 | 0.007052 | 0.00362 | 1507 |
| hsa05416 | Viral myoc   | 58      | 0.679317   | 2.820205 | 0.001704 | 0.007052 | 0.00362 | 3484 |
| hsa04611 | Platelet act | 114     | 0.414755   | 1.932947 | 0.001706 | 0.007052 | 0.00362 | 4166 |
| hsa04662 | B cell rece  | 79      | 0.486606   | 2.131165 | 0.001706 | 0.007052 | 0.00362 | 3624 |
| hsa03010 | Ribosome     | 110     | 0.364183   | 1.686646 | 0.001709 | 0.007052 | 0.00362 | 4512 |
| hsa04512 | ECM-recep    | 82      | 0.401109   | 1.765811 | 0.001709 | 0.007052 | 0.00362 | 3158 |
| hsa05410 | Hypertropl   | 82      | 0.410956   | 1.809162 | 0.001709 | 0.007052 | 0.00362 | 3741 |
| hsa05150 | Staphylocc   | 73      | 0.708493   | 3.070399 | 0.001715 | 0.007052 | 0.00362 | 1835 |

|          |               |     |          |          |          |          |          |      |
|----------|---------------|-----|----------|----------|----------|----------|----------|------|
| hsa04640 | Hematopo      | 91  | 0.61745  | 2.783194 | 0.001724 | 0.007052 | 0.00362  | 2177 |
| hsa04666 | Fc gamma      | 95  | 0.414546 | 1.880011 | 0.001724 | 0.007052 | 0.00362  | 2119 |
| hsa05323 | Rheumatoi     | 90  | 0.580316 | 2.598251 | 0.00173  | 0.007052 | 0.00362  | 2136 |
| hsa04659 | Th17 cell d   | 96  | 0.577157 | 2.622631 | 0.001733 | 0.007052 | 0.00362  | 3084 |
| hsa04660 | T cell rece   | 96  | 0.442938 | 2.012733 | 0.001733 | 0.007052 | 0.00362  | 4277 |
| hsa04064 | NF-kappa      | 98  | 0.542017 | 2.463989 | 0.001742 | 0.007052 | 0.00362  | 2442 |
| hsa04620 | Toll-like re  | 98  | 0.521666 | 2.371475 | 0.001742 | 0.007052 | 0.00362  | 3215 |
| hsa04625 | C-type lec    | 98  | 0.461367 | 2.097358 | 0.001742 | 0.007052 | 0.00362  | 4166 |
| hsa04933 | AGE-RAGE      | 99  | 0.434776 | 1.98581  | 0.001742 | 0.007052 | 0.00362  | 2760 |
| hsa05146 | Amoebiasi     | 98  | 0.501684 | 2.280636 | 0.001742 | 0.007052 | 0.00362  | 2760 |
| hsa05142 | Chagas dis    | 97  | 0.500707 | 2.273293 | 0.001745 | 0.007052 | 0.00362  | 3215 |
| hsa05322 | Systemic lu   | 48  | 0.77094  | 3.075403 | 0.001745 | 0.007052 | 0.00362  | 2136 |
| hsa05144 | Malaria       | 47  | 0.672157 | 2.67504  | 0.001748 | 0.007052 | 0.00362  | 1716 |
| hsa05321 | Inflammat     | 55  | 0.663962 | 2.712362 | 0.001754 | 0.007052 | 0.00362  | 2436 |
| hsa04672 | Intestinal ir | 42  | 0.649702 | 2.503836 | 0.001783 | 0.007052 | 0.00362  | 1835 |
| hsa04940 | Type I diab   | 41  | 0.697649 | 2.671138 | 0.001783 | 0.007052 | 0.00362  | 3215 |
| hsa05332 | Graft-vers    | 41  | 0.7668   | 2.935898 | 0.001783 | 0.007052 | 0.00362  | 2136 |
| hsa05320 | Autoimmu      | 44  | 0.720346 | 2.806441 | 0.001792 | 0.007052 | 0.00362  | 1835 |
| hsa05340 | Primary im    | 34  | 0.61656  | 2.25984  | 0.001795 | 0.007052 | 0.00362  | 2890 |
| hsa05330 | Allograft re  | 33  | 0.812025 | 2.953563 | 0.001812 | 0.007052 | 0.00362  | 2136 |
| hsa05310 | Asthma        | 23  | 0.817058 | 2.76112  | 0.001845 | 0.007052 | 0.00362  | 1835 |
| hsa00532 | Glycosamin    | 20  | 0.626082 | 2.047928 | 0.001887 | 0.007052 | 0.00362  | 1242 |
| hsa00360 | Phenylalan    | 17  | -0.67266 | -2.13332 | 0.00207  | 0.007052 | 0.00362  | 4543 |
| hsa00340 | Histidine r   | 21  | -0.65056 | -2.23464 | 0.002083 | 0.007052 | 0.00362  | 2833 |
| hsa01210 | 2-Oxocarb     | 18  | -0.64464 | -2.0862  | 0.002092 | 0.007052 | 0.00362  | 2111 |
| hsa00220 | Arginine b    | 20  | -0.67829 | -2.28376 | 0.002119 | 0.007052 | 0.00362  | 3535 |
| hsa04744 | Phototrans    | 20  | -0.60806 | -2.04732 | 0.002119 | 0.007052 | 0.00362  | 6585 |
| hsa04977 | Vitamin di    | 20  | -0.62327 | -2.0985  | 0.002119 | 0.007052 | 0.00362  | 2640 |
| hsa00040 | Pentose ar    | 26  | -0.58114 | -2.07972 | 0.002165 | 0.007052 | 0.00362  | 4801 |
| hsa00053 | Ascorbate     | 23  | -0.66496 | -2.29322 | 0.002174 | 0.007052 | 0.00362  | 4801 |
| hsa00790 | Folate bios   | 23  | -0.61661 | -2.12648 | 0.002174 | 0.007052 | 0.00362  | 3681 |
| hsa04966 | Collecting    | 27  | -0.63932 | -2.29001 | 0.002198 | 0.007052 | 0.00362  | 1571 |
| hsa00640 | Propanoat     | 30  | -0.60366 | -2.20927 | 0.002212 | 0.007052 | 0.00362  | 3624 |
| hsa00260 | Glycine, se   | 35  | -0.57222 | -2.23196 | 0.002222 | 0.007052 | 0.00362  | 4855 |
| hsa00350 | Tyrosine m    | 33  | -0.5719  | -2.20027 | 0.002222 | 0.007052 | 0.00362  | 4543 |
| hsa00410 | beta-Alani    | 28  | -0.62022 | -2.23608 | 0.002222 | 0.007052 | 0.00362  | 4220 |
| hsa00650 | Butanoate     | 24  | -0.72548 | -2.53474 | 0.002237 | 0.007052 | 0.00362  | 4033 |
| hsa00020 | Citrate cyc   | 29  | -0.62251 | -2.25928 | 0.002247 | 0.007052 | 0.00362  | 3720 |
| hsa00250 | Alanine, as   | 34  | -0.52294 | -2.02405 | 0.002247 | 0.007052 | 0.00362  | 2912 |
| hsa00630 | Glyoxylate    | 29  | -0.65739 | -2.38589 | 0.002247 | 0.007052 | 0.00362  | 2522 |
| hsa00071 | Fatty acid    | 42  | -0.50826 | -2.0708  | 0.002268 | 0.007052 | 0.00362  | 4033 |
| hsa00380 | Tryptophan    | 40  | -0.48311 | -1.9421  | 0.002273 | 0.007052 | 0.00362  | 4622 |
| hsa00270 | Cysteine ar   | 46  | -0.43518 | -1.82303 | 0.002278 | 0.007052 | 0.00362  | 4322 |
| hsa00280 | Valine, leu   | 46  | -0.65452 | -2.74186 | 0.002278 | 0.007052 | 0.00362  | 4033 |
| hsa00620 | Pyruvate m    | 36  | -0.53948 | -2.10078 | 0.002309 | 0.007052 | 0.00362  | 3584 |
| hsa00330 | Arginine ar   | 48  | -0.5437  | -2.30999 | 0.002331 | 0.007052 | 0.00362  | 3867 |
| hsa00190 | Oxidative p   | 98  | -0.59272 | -2.91465 | 0.002336 | 0.007052 | 0.00362  | 4665 |
| hsa00830 | Retinol me    | 50  | -0.4229  | -1.79807 | 0.002358 | 0.007052 | 0.00362  | 4801 |
| hsa00980 | Metabolism    | 60  | -0.44619 | -1.95351 | 0.002364 | 0.007052 | 0.00362  | 4801 |
| hsa01230 | Biosynthes    | 65  | -0.46937 | -2.09331 | 0.00237  | 0.007052 | 0.00362  | 2330 |
| hsa01200 | Carbon me     | 110 | -0.52915 | -2.67333 | 0.002398 | 0.007052 | 0.00362  | 3965 |
| hsa04721 | Synaptic ve   | 68  | -0.41132 | -1.84392 | 0.002415 | 0.007052 | 0.00362  | 3551 |
| hsa00010 | Glycolysis    | 57  | -0.42894 | -1.86114 | 0.002421 | 0.007052 | 0.00362  | 3781 |
| hsa00982 | Drug meta     | 57  | -0.46829 | -2.03187 | 0.002421 | 0.007052 | 0.00362  | 4801 |
| hsa04976 | Bile secreti  | 71  | -0.42032 | -1.90171 | 0.002451 | 0.007052 | 0.00362  | 5533 |
| hsa04146 | Peroxisom     | 77  | -0.49028 | -2.24572 | 0.002469 | 0.007052 | 0.00362  | 3625 |
| hsa01240 | Biosynthes    | 142 | -0.36795 | -1.91669 | 0.002481 | 0.007052 | 0.00362  | 5150 |
| hsa04932 | Non-alcoh     | 137 | -0.31714 | -1.63619 | 0.002538 | 0.007151 | 0.003671 | 4665 |

|          |              |     |          |          |          |          |          |      |
|----------|--------------|-----|----------|----------|----------|----------|----------|------|
| hsa04714 | Thermoge     | 189 | -0.37539 | -2.03162 | 0.002591 | 0.007236 | 0.003714 | 5726 |
| hsa05016 | Huntingtor   | 254 | -0.27492 | -1.54784 | 0.002786 | 0.007714 | 0.00396  | 4976 |
| hsa04151 | PI3K-Akt s   | 321 | 0.274689 | 1.497101 | 0.003003 | 0.008246 | 0.004233 | 4283 |
| hsa04015 | Rap1 signa   | 194 | 0.303889 | 1.550691 | 0.003252 | 0.008838 | 0.004537 | 3096 |
| hsa04921 | Oxytocin s   | 138 | 0.337701 | 1.648578 | 0.003273 | 0.008838 | 0.004537 | 4121 |
| hsa05160 | Hepatitis C  | 144 | 0.332322 | 1.624378 | 0.003328 | 0.008911 | 0.004574 | 3841 |
| hsa05100 | Bacterial in | 67  | 0.409178 | 1.738011 | 0.003396 | 0.00896  | 0.004599 | 4238 |
| hsa04115 | p53 signal   | 72  | 0.379519 | 1.644094 | 0.003401 | 0.00896  | 0.004599 | 4170 |
| hsa04540 | Gap juncti   | 81  | 0.383811 | 1.684758 | 0.003436 | 0.008979 | 0.004609 | 3028 |
| hsa03050 | Proteasom    | 43  | 0.46989  | 1.808553 | 0.003636 | 0.009425 | 0.004838 | 5680 |
| hsa00601 | Glycosphir   | 27  | -0.49502 | -1.77313 | 0.004396 | 0.011303 | 0.005802 | 3087 |
| hsa04960 | Aldosteror   | 35  | -0.44244 | -1.72576 | 0.004444 | 0.011339 | 0.00582  | 3042 |
| hsa01212 | Fatty acid r | 55  | -0.41036 | -1.77893 | 0.00463  | 0.011666 | 0.005989 | 4033 |
| hsa04742 | Taste trans  | 47  | -0.40025 | -1.68098 | 0.004651 | 0.011666 | 0.005989 | 5833 |
| hsa00140 | Steroid hor  | 50  | -0.40592 | -1.72588 | 0.004717 | 0.011666 | 0.005989 | 4801 |
| hsa04978 | Mineral ab   | 50  | -0.41099 | -1.74742 | 0.004717 | 0.011666 | 0.005989 | 4800 |
| hsa05204 | Chemical c   | 69  | -0.38993 | -1.75915 | 0.004808 | 0.011801 | 0.006058 | 4801 |
| hsa04120 | Ubiquitin r  | 132 | 0.319629 | 1.545893 | 0.005017 | 0.01213  | 0.006227 | 4244 |
| hsa05418 | Fluid shear  | 132 | 0.321153 | 1.553264 | 0.005017 | 0.01213  | 0.006227 | 4210 |
| hsa04623 | Cytosolic E  | 56  | 0.406643 | 1.677497 | 0.005119 | 0.012287 | 0.006307 | 4106 |
| hsa04964 | Proximal tu  | 20  | -0.5828  | -1.96225 | 0.006356 | 0.015142 | 0.007773 | 3818 |
| hsa04926 | Relaxin sig  | 119 | 0.328762 | 1.556588 | 0.006633 | 0.015688 | 0.008053 | 4283 |
| hsa05222 | Small cell l | 90  | 0.354492 | 1.58717  | 0.00692  | 0.016248 | 0.00834  | 3158 |
| hsa05143 | African try  | 33  | 0.472921 | 1.720147 | 0.007246 | 0.016891 | 0.00867  | 2248 |
| hsa04723 | Retrograde   | 121 | -0.31092 | -1.5841  | 0.007444 | 0.017228 | 0.008843 | 5923 |
| hsa05110 | Vibrio chol  | 49  | -0.36595 | -1.55202 | 0.009434 | 0.021678 | 0.011128 | 1218 |
| hsa03018 | RNA degra    | 69  | 0.365464 | 1.566384 | 0.010239 | 0.023362 | 0.011992 | 5957 |
| hsa03030 | DNA replic   | 36  | 0.453267 | 1.691589 | 0.010545 | 0.023892 | 0.012264 | 3666 |
| hsa00030 | Pentose ph   | 28  | -0.45263 | -1.63185 | 0.011111 | 0.024823 | 0.012742 | 2873 |
| hsa04975 | Fat digesti  | 35  | -0.41785 | -1.62985 | 0.011111 | 0.024823 | 0.012742 | 3577 |
| hsa00970 | Aminoacyl    | 24  | -0.49729 | -1.73748 | 0.011186 | 0.024823 | 0.012742 | 5582 |
| hsa04350 | TGF-beta s   | 87  | 0.34979  | 1.563349 | 0.011905 | 0.026239 | 0.013469 | 3909 |
| hsa04150 | mTOR sign    | 146 | -0.27424 | -1.43059 | 0.012563 | 0.027502 | 0.014118 | 4030 |
| hsa05012 | Parkinson    | 203 | -0.24252 | -1.32796 | 0.015625 | 0.033977 | 0.017441 | 5179 |
| hsa00561 | Glycerolip   | 55  | -0.35012 | -1.51779 | 0.018519 | 0.039956 | 0.02051  | 5004 |
| hsa05412 | Arrhythmo    | 68  | 0.349985 | 1.495028 | 0.018707 | 0.039956 | 0.02051  | 3858 |
| hsa00480 | Glutathion   | 53  | -0.3567  | -1.53302 | 0.018779 | 0.039956 | 0.02051  | 2907 |
| hsa03008 | Ribosome     | 73  | 0.350451 | 1.518753 | 0.018868 | 0.039956 | 0.02051  | 5175 |
| hsa00860 | Porphyrin    | 34  | -0.40278 | -1.55899 | 0.020225 | 0.042551 | 0.021842 | 4839 |
| hsa00983 | Drug meta    | 69  | -0.32435 | -1.46329 | 0.021635 | 0.045223 | 0.023214 | 4801 |
| hsa00062 | Fatty acid   | 25  | -0.44201 | -1.55878 | 0.022026 | 0.045747 | 0.023483 | 5528 |

# leading\_edcore\_enrichment

tags=34%, 113/54331/1439/5880/6775/83593/4609/1436/330/3575/1902/1438/2252/637/3725/78  
tags=49%, 330/718/10308/4939/3115/7097/3113/637/3109/6347/3108/6352/3460/836/6672/2999  
tags=27%, 929/5880/11221/4609/1436/3554/3310/2252/3725/4208/836/2353/9448/5579/5156/18  
tags=41%, 3587/10673/1439/7133/1436/3554/3575/1234/1438/3603/90865/729230/7852/6362/35  
tags=44%, 23643/10109/834/7846/302/197259/929/5788/29108/4609/84617/330/9844/3071/1037  
tags=35%, 5880/7058/64098/330/857/3676/3725/3908/1293/894/858/7450/2335/7409/5579/1062  
tags=49%, 113/3689/4773/4609/3554/1959/8829/3115/3113/3109/3725/3108/958/894/3601/3683  
tags=35%, 960/5329/4060/3059/4609/857/7097/836/858/7099/2335/7409/5579/4318/3082/10855  
tags=38%, 960/10109/834/3059/929/29108/9844/3554/718/837/8767/3725/6352/10392/7099/732  
tags=48%, 2212/1536/716/834/713/714/4600/715/718/51311/8829/51284/4939/7097/3725/6223/  
tags=40%, 113/3587/54331/5880/4773/4609/3554/1234/637/7852/10672/6347/6352/836/2791/63  
tags=31%, 25939/54331/5880/4773/7133/1234/7097/637/3725/7852/836/60489/919/7099/2791/2  
tags=52%, 960/7431/4609/7128/4939/3115/7097/3113/637/3109/3725/953/4067/3108/958/894/31  
tags=40%, 834/29108/4600/51284/4939/90865/3115/3113/637/3109/6347/3108/6352/3460/836/7  
tags=23%, 3684/10109/3689/5880/9459/1902/3071/3676/2252/7852/7114/10672/3683/2335/7409  
tags=45%, 2212/10109/834/7846/3059/29108/84617/3554/1902/3071/9871/10376/4542/837/3725  
tags=39%, 3428/1536/834/2634/114769/29108/7128/330/4939/837/8767/3725/6347/9447/6352/1  
tags=43%, 9734/718/1959/1234/3725/4067/894/836/1960/6672/5366/7188/3133/87/5594/5925/8  
tags=49%, 8761/9631/3646/26986/9669/79902/6613/1973/8672/8487/10762/53371/1965/387082/  
tags=38%, 3684/942/3689/5788/1462/6614/6402/5175/4267/3115/914/3113/3676/3109/57502/31  
tags=32%, 6775/4773/4609/1959/7097/637/3725/353376/836/7099/1960/2353/5579/3576/4318/1  
tags=38%, 3587/1439/6775/4609/3575/1438/5771/3574/3460/894/3601/5156/3560/3563/3455/36  
tags=43%, 2212/10109/834/3937/5880/4773/29108/9844/3676/3725/6347/7099/2353/3932/2335/  
tags=35%, 2213/3684/3587/9103/1520/2212/2207/4360/3689/929/718/11151/3115/7097/3113/70  
tags=40%, 113/54331/1794/3055/5880/2268/9844/1234/729230/7852/6362/4067/6347/3702/6352  
tags=39%, 7305/2207/3689/3937/5880/4773/10870/962/637/3460/3683/836/919/3932/7409/5579  
tags=33%, 960/7431/4609/4082/9839/23414/894/836/5579/2146/5728/5156/406996/4318/406991  
tags=50%, 4609/4175/894/10926/9232/11200/5925/890/9134/8317/6502/7533/996/7534/7042/99  
tags=44%, 2213/3684/4689/4688/9103/1520/2212/1536/4360/7846/3689/929/7058/84617/715/71  
tags=40%, 1520/1439/7846/330/597/10376/637/3725/836/1513/2353/5366/3002/3563/84790/945  
tags=29%, 83593/4773/4609/894/5728/3576/3133/11200/5594/6237/5925/890/5500/9134/22808/  
tags=43%, 9976/54331/942/3055/4773/4609/718/1234/637/3725/4067/836/2791/2353/3383/2920  
tags=55%, 3310/11017/6632/10189/1655/3178/10946/10285/23350/55119/4686/51690/10915/494  
tags=29%, 1536/834/197259/6775/29108/7128/330/90865/637/5836/3460/353376/7099/1540/718  
tags=48%, 2213/4689/4688/7305/9103/2212/3937/4773/1436/10859/3554/2274/11025/3725/1028  
tags=40%, 2213/4600/7128/3310/51284/4939/7097/637/3725/894/836/7099/2353/30835/917/915  
tags=34%, 3684/3075/3078/5329/716/11326/3080/3689/713/714/715/718/7056/1604/7450/1675/  
tags=48%, 1520/3310/3115/3113/3109/3108/567/6890/925/3126/972/3123/3821/3822/3119/3133  
tags=32%, 3684/942/929/2313/4609/1436/330/597/5090/2209/958/894/3087/4208/862/3576/300/  
tags=42%, 3684/23643/716/834/3689/713/929/714/29108/715/718/3394/3725/353376/836/10392  
tags=45%, 197259/7133/7128/330/3725/6347/6352/836/2353/3383/2920/64127/2919/7188/6372/  
tags=65%, 3684/4689/4688/9103/2212/1536/3689/718/3115/7097/3113/3676/3109/3725/3108/22  
tags=46%, 3587/23643/330/3310/1234/3115/7097/3113/3109/3908/3108/958/3460/836/7099/312  
tags=41%, 7128/3725/6347/6280/836/2353/2920/2919/7188/6372/3576/4318/5594/6356/3627/62  
tags=48%, 6775/4773/3115/3113/3109/3725/3108/3460/919/2353/3932/917/915/3126/3123/864/  
tags=47%, 3684/834/3689/929/29108/3310/718/7097/836/7099/2920/2919/3576/317/4615/3606/  
tags=47%, 3587/7133/1436/1234/729230/7852/6362/6347/6352/6366/6357/6348/6349/414062/29  
tags=44%, 4773/7097/3725/3460/353376/919/7099/2353/3932/917/915/5728/55509/940/920/559  
tags=49%, 113/3676/3908/3479/7168/3678/6444/7171/7042/3685/7043/3694/108/7273/6445/782  
tags=28%, 3684/4689/4688/1536/3689/5880/83593/5175/4267/3676/7852/3702/3683/7409/5579/  
tags=74%, 942/3689/5880/857/3115/3113/637/3109/3908/1604/3108/958/3683/836/3383/3126/3  
tags=46%, 113/2212/2207/3937/6916/83706/10672/4067/7450/64805/10627/5908/5332/1281/545  
tags=43%, 2213/5880/4773/27071/10859/8519/11025/3725/10288/4067/2353/7409/5579/971/559  
tags=38%, 6223/200916/6202/6173/11224/6136/6224/23521/6188/6175/6142/25873/6193/6159/6  
tags=33%, 960/7058/3676/3908/1293/7450/2335/3915/1311/1282/948/961/1278/3371/1292/3678  
tags=44%, 3676/3908/3479/1906/7168/3678/6444/7171/7042/3685/7043/3694/7273/6445/782/65  
tags=49%, 2213/3684/9103/2359/3075/2212/716/3689/713/714/715/718/2357/3115/3113/3109/3

tags=48%, 3684/960/912/945/929/1436/3554/3575/1438/3115/914/3113/3676/911/3109/1604/35  
tags=28%, 2213/2212/10109/3055/5880/5788/4082/50807/4067/2209/7409/5579/8877/2215/6533  
tags=48%, 10673/942/3689/3115/7097/3113/3109/3725/6347/3108/6352/3683/1513/7099/2353/6  
tags=56%, 4773/196/3554/3115/3113/3109/3725/3108/3460/919/2353/3932/917/915/3126/3123/  
tags=48%, 3937/5788/4773/3725/3702/919/2353/3932/7409/917/925/915/868/940/920/5594/553  
tags=41%, 23643/10673/929/7128/330/597/3554/4067/958/6366/353376/6357/7099/3932/8792/5  
tags=43%, 23643/942/929/51311/51284/7097/7096/3725/958/6352/353376/1513/7099/2353/6348  
tags=46%, 2207/834/4773/29108/1959/3725/1960/30835/1540/868/114548/64581/5594/6237/365  
tags=34%, 1536/7056/3725/6347/836/2335/5579/3383/3576/6401/5332/1281/1282/1958/5594/43  
tags=38%, 3684/912/3689/929/3554/7097/911/3908/836/7099/2335/5579/2920/2919/3576/913/3  
tags=44%, 713/714/718/7097/3725/6347/6352/3460/919/7099/2353/6348/6349/414062/917/915/  
tags=69%, 2212/942/716/713/714/715/718/3115/3113/3109/3108/2209/958/2215/3126/3123/311  
tags=53%, 3689/7058/2532/5175/7097/2995/3820/6347/958/3683/7099/3383/22914/3576/6403/3  
tags=62%, 6775/3115/7097/3113/3109/3725/3108/3460/7099/64127/3126/3123/3119/3118/3122/  
tags=52%, 10673/942/3115/3113/3676/3109/7852/3108/958/3601/3126/3123/3119/3118/940/608  
tags=73%, 942/3115/3113/3109/3108/3126/3002/3123/3119/3133/3118/940/3122/3112/3134/355  
tags=68%, 942/3115/3113/3109/3108/3126/3002/3123/3821/3119/3133/3824/3118/940/3122/311  
tags=57%, 942/3115/3113/3109/3108/958/3126/3002/3123/3119/3133/3118/940/3122/3112/3134  
tags=56%, 100/5788/3575/958/3932/6890/925/915/64421/920/3543/7535/916/4261/6891/5993/2  
tags=79%, 942/3115/3113/3109/3108/958/3126/3002/3123/3119/3133/3118/940/3122/3112/3134  
tags=78%, 2207/3115/3113/3109/3108/958/3126/3123/3119/3118/3122/3112/6356/2206/2205/31  
tags=45%, 56548/51363/55454/64131/29940/22856/337876/50515/55790  
tags=88%, 1644/6898/137362/5053/218/222/3242/10249/259307/2806/221/2805/4128/4282/4129  
tags=76%, 55748/501/218/222/224/223/219/144193/221/217/26/84735/10841/443/4128/4129  
tags=78%, 3420/137362/84706/3417/3421/587/48/2806/2805/95/2875/3418/50/162417  
tags=65%, 137362/2746/445/84706/435/2806/2805/4843/27165/384/95/2875/162417  
tags=75%, 1258/51806/9187/8787/9626/805/2978/91860/6010/5158/3000/2979/2779/6011/810  
tags=55%, 8029/2346/335/6948/25974/9963/6573/686/5948/113278/113235  
tags=73%, 79799/54600/54659/54579/54576/54578/54658/54657/54577/54575/2990/10327/9942  
tags=91%, 79799/54600/54659/54579/54576/54578/54658/54657/54577/54575/501/2990/9104/1  
tags=61%, 8836/5092/5860/8644/84105/5053/2643/250/4337/2356/248/249/873/6697  
tags=48%, 495/9296/127124/529/535/245972/527/1188/50617/6521/525/245973/155066  
tags=63%, 8310/79611/51/26275/8801/1962/5095/35/18/5096/32/593/4329/55902/1892/84532/3  
tags=66%, 2593/5723/2653/635/29968/501/64902/189/113675/1610/51268/6470/29958/1491/273  
tags=73%, 1644/6898/1312/128/5409/137362/218/222/3242/130/81889/2954/3081/1621/259307/  
tags=79%, 55748/54498/8310/501/1807/51/218/26275/222/1962/224/35/223/219/18/221/51733/2  
tags=79%, 6296/3033/64064/5019/123876/348158/56898/54988/7915/79944/1962/35/18/2571/18  
tags=59%, 6389/3420/5105/1743/6391/8801/4191/5091/3417/3421/4967/5106/48/55753/3418/88  
tags=56%, 2746/64902/2346/189/80150/445/7915/84706/435/18/8659/259307/2806/2571/2805/2  
tags=62%, 189/4191/125061/5095/6470/51179/48/5096/2731/55902/81888/84532/9380/112817/3  
tags=57%, 3033/128/1376/8310/10455/501/33/51/81616/130/1962/224/35/223/10449/219/34/30/  
tags=62%, 51166/1644/56267/3033/501/1743/8564/130013/125061/1962/224/223/219/259307/64  
tags=52%, 56267/6898/635/29968/137362/10768/64902/191/23743/4191/113675/4143/587/2593  
tags=74%, 3033/64064/5019/501/27034/26275/64902/64087/197322/587/1962/5095/224/35/223/  
tags=56%, 501/5105/134526/10873/4191/5091/224/223/5106/219/32/217/55902/84532/9380/531  
tags=54%, 4953/54498/501/137362/113451/8974/1152/1610/79814/224/58510/223/219/8659/280  
tags=63%, 1327/6390/56901/4698/4717/7381/4728/1347/6389/7384/496/4722/533/479/4726/537  
tags=60%, 79799/54600/54659/54579/1549/54576/54578/54658/54657/54577/128/54575/9249/5  
tags=62%, 79799/2944/54600/54659/54579/4259/1549/54576/2948/54578/54658/54657/54577/12  
tags=37%, 445/84706/5091/113675/4143/229/5232/3417/3421/587/6470/435/48/2806/2805/1491  
tags=51%, 29968/54363/128/6389/3420/8310/283871/137362/51/1743/10873/2746/9104/26275/7  
tags=38%, 10814/533/160/23025/6530/161/6505/6809/6538/773/6511/9296/594855/127124/529/  
tags=46%, 128/501/92579/5105/218/222/7167/10327/130/2203/229/5232/224/223/5106/219/253  
tags=61%, 79799/2944/54600/54659/54579/4259/1549/54576/2326/2948/54578/54658/54657/23  
tags=63%, 6548/6554/5243/6344/115/9429/111/79799/6523/114/343/54600/54659/54579/54576/  
tags=53%, 255027/8310/10455/5194/10478/51/5191/5825/26061/6647/189/5824/8309/11001/106  
tags=51%, 64802/4338/29926/158067/4144/169355/84274/79799/54600/54659/54579/51805/553  
tags=43%, 1327/6390/56901/4698/3630/4717/54205/7381/4728/1347/6389/5602/7384/51094/472

tags=53%, 4708/7249/125965/6598/4707/57492/5600/788/84335/115/29078/79133/116228/28958  
tags=39%, 3066/126328/2892/7019/56171/293/774/5693/26100/1327/6390/56901/6874/4698/471  
tags=32%, 54331/7058/4609/1436/3575/1902/7097/3676/2252/3908/1293/3574/894/7450/7099/2  
tags=28%, 3684/113/3689/3937/5880/83593/1436/1902/2357/2252/3683/7409/5579/5156/3082/5  
tags=38%, 113/4773/57118/3725/4208/3759/2353/5579/5332/817/5997/952/29904/5594/5500/86  
tags=35%, 4609/4600/4939/637/836/3455/9451/5594/5925/3665/3646/9076/317/23586/3627/677  
tags=43%, 10109/3059/9844/857/858/2335/10096/391/3678/10095/7414/71/5290/399694/859/36  
tags=40%, 637/894/836/5366/5728/1643/11200/92344/3479/9134/27244/317/6241/5054/355/643  
tags=32%, 113/7846/84617/1902/10376/2697/5579/3357/5156/5332/84790/5594/203068/80310/5  
tags=53%, 5699/5698/5687/5696/5721/5720/3458/5685/5682/23198/5689/5706/5707/5700/10213  
tags=48%, 28/8703/10331/2528/8704/79369/6484/53947/2524/2525/2529/2527/2651  
tags=49%, 4306/3643/5578/5296/5170/5595/5291/476/5582/486/482/6340/6337/481/3291/23327  
tags=55%, 51144/51495/2194/23205/60481/126129/3033/79966/54995/1376/8310/33/51/79993/8  
tags=57%, 112/255022/5137/9033/50834/6335/114/6326/1131/2555/3351/5568/5331/3354/80835  
tags=54%, 79799/54600/54659/54579/54576/1584/3292/54578/54658/54657/54577/1312/54575/3  
tags=62%, 6523/1317/7779/4502/2495/3163/491/4493/261729/540/140803/115019/4501/4495/44  
tags=52%, 79799/2944/54600/54659/54579/4259/1549/54576/56267/9/2948/54578/54658/54657/  
tags=35%, 330/92912/7321/9246/868/1643/22954/55294/4281/6502/9021/55958/996/8453/51465  
tags=36%, 4688/5880/3554/5175/857/7056/3725/6347/4208/858/2353/3383/4318/6401/653361/4  
tags=43%, 834/29108/90865/9447/6352/6351/84265/3665/23586/3627/3606/11035/3553/4792/47  
tags=70%, 760/762/5105/2746/8671/476/358/5106/27165/10991/486/482/1468/481  
tags=36%, 113/54331/3725/2791/2353/4318/5332/1281/1282/2790/5594/4313/1278/1906/9586/7  
tags=31%, 4609/330/3908/836/2335/7188/5728/1643/3915/1282/5925/9134/317/6502/7185/4792  
tags=39%, 5579/3383/8542/6401/5332/3620/4615/3606/355/3553/7412/3458/2776  
tags=54%, 4716/4719/112/4708/2570/4707/5600/2563/10681/115/111/126328/3763/2892/774/11  
tags=22%, 9296/127124/529/535/245972/527/50617/525/3784/245973/155066  
tags=54%, 8761/5394/7832/26986/4848/84186/246175/9125/55802/132430/694/51690/2026/1134  
tags=44%, 4175/5557/29935/5427/5422/10535/6117/6118/5982/5984/79621/5111/54107/4174/41  
tags=29%, 9104/2203/229/51071/414328/5211/132158/64080  
tags=43%, 8694/10554/80168/10555/2169/2168/1056/84647/335/10999/4547/50487/2806/5407/3  
tags=54%, 79587/118672/25973/51091/10667/5188/57505/80222/2193/124454/57176/23395/549  
tags=39%, 4609/10468/3624/2200/5594/1634/2331/4681/7042/4086/7043/26585/5308/7048/3458  
tags=32%, 9681/8408/3480/57600/64900/58528/7480/10641/8140/3643/8131/7855/5578/6195/18  
tags=39%, 10105/5708/89953/111/6531/126328/293/5693/1327/6390/56901/805/4698/4717/5568  
tags=45%, 253558/196051/3990/2710/8525/129642/64900/501/8694/10554/80168/10555/10327/3  
tags=40%, 2697/3676/3908/3678/6444/3685/3694/6445/782/6547/71/88/3696/6442/784/4000/36  
tags=36%, 2938/2936/9027/2678/2880/3417/4258/373156/2947/51471/79094/2940/79017/2686/2  
tags=49%, 26354/83732/10813/29889/23560/55127/134430/84128/51602/55813/29107/10199/23  
tags=59%, 645/79799/54600/54659/54579/3163/54576/7390/54578/54658/54657/54577/54575/29  
tags=46%, 79799/2944/978/54600/54659/54579/4259/1549/54576/9/2948/54578/54658/54657/54  
tags=56%, 51144/51495/60481/3033/641371/10965/11332/79993/51102/9524/10449/122970/937.

52/3908/3574/10672/3460/894/3601/836/2791/2353/5366/2335/5579/862/10161/7188/5728/3576  
2/567/6890/3126/7188/972/3123/80818/3119/3133/80264/3118/3122/3112/3455/9451/5500/3665  
44/3082/5908/1847/1846/285/5594/10235/3479/6237/8605/374/6789/5321/80310/22808/5533/92  
574/6347/3624/958/6352/3460/6366/3601/6357/6348/6349/414062/8792/2920/2919/51554/6375/6  
7/7097/837/8767/3725/836/10392/7099/2353/10627/399/6281/3576/114548/84790/113146/5594  
7/5728/5156/3082/5908/3915/1311/1282/87/5594/3479/5500/1278/3371/103910/80310/55742/74  
/2353/3932/567/917/3383/915/3126/5728/3123/9232/3119/3560/3133/11200/3118/3122/3112/19  
/817/7291/406991/5594/1634/4313/3479/6237/5500/1278/1839/22808/355/3678/8826/117581/96  
1/10627/7188/3576/92610/114548/831/5332/87/5594/3099/103910/10096/9252/4615/5216/3606/  
6347/7450/7099/2353/5579/1675/200916/6202/3576/2162/728/114548/6403/3455/5594/6173/963  
48/6349/414062/567/5579/6890/7188/3576/5156/5332/3133/2790/6351/5594/5925/5533/3134/55  
353/567/917/5579/6890/8905/915/7188/3133/2790/920/5594/9582/5533/3134/4615/5530/355/31  
683/836/919/567/917/3383/6890/915/3126/7188/3123/864/1643/3119/3133/3118/3122/3112/345  
099/5579/3383/3126/3576/3123/114548/3119/3118/3122/3112/3455/5594/3665/317/23586/3627/  
1/10627/5156/87/3687/5594/1730/6237/5500/103910/10096/80310/22808/55740/5216/3678/8826  
5/10672/4644/836/7099/2353/3576/4642/114548/64005/84790/5594/203068/9076/10096/4615/36  
0392/7099/84674/2920/64127/2919/2633/7188/3576/115362/51393/114548/118429/5332/24145/  
90/9134/3665/6502/7533/3134/7185/9586/3516/5423/3105/3107/7534/4792/10379/3106/2960/31  
78664/29107/10189/57122/132430/11260/4686/8669/3837/1207/8665/23165/10799/5901/26019/6  
08/958/3683/9019/3383/925/3126/3123/6403/6401/3119/3133/6404/3118/940/3384/3122/3112/5  
643/5594/5925/890/9134/3665/317/23586/3717/6772/4615/9586/355/51135/7534/4792/7042/704  
00/3717/6772/9021/4170/9180/3588/5159/2273/10379/3459/9655/85480/6774/50615/3594/1026/  
7409/9815/925/3576/114548/920/5594/10096/4615/391/3606/3678/3553/51135/4792/10095/753  
96/637/8767/3109/3108/2209/3460/836/7099/30835/64127/8877/2215/3126/972/3123/3119/3118  
2/6366/6357/2791/6348/6349/414062/7409/5579/2920/2919/6375/6372/3576/6846/6373/5908/63  
/3383/2215/22914/3002/3821/3822/3133/3824/3384/3455/5594/5533/5530/355/3105/5551/3107/  
/1545/5594/6935/9134/3371/6624/4853/9252/4170/7168/3678/5159/7042/10253/994/1786/4363/  
4/7043/472/1026/891/7272/5933/7532/4087/2810/701/1027/5111/10274/29945/10459/7529/235  
8/11151/10376/3115/7097/3113/3109/3108/2209/7099/30835/6890/2215/3126/3123/3119/1311/6  
1/5594/317/7185/4170/840/355/113457/112714/5551/4792/1965/7278/1519/472/1075/4001/71/4  
5533/3134/5054/5530/90550/3105/3107/3106/7042/3135/7043/677/10758/7048/2113/472/1026/8  
/2919/3576/3133/285/2790/3455/5594/5925/3665/3717/6772/5533/3134/5530/7538/355/3105/31  
4115/3183/220988/22938/3192/9410/57461/51645/10569/6633/23451/6100/57819/51691/144983/  
38/114548/817/3455/8605/5321/3717/6772/11035/355/3553/10379/3459/6774/3458/2752/142/31  
38/2209/54209/3460/1513/2353/3932/8792/1540/55423/2215/653361/3455/5594/6772/5533/9021  
/868/3560/940/3455/9451/9134/3665/317/23586/6772/4615/4599/355/3553/6504/51135/4792/10  
2/2162/728/710/10544/3687/729/5054/717/2149  
/3824/3118/3122/3112/10437/920/3134/5721/3105/3107/3117/3106/3135/5720/3125/3127/4261/  
2/2120/4318/2530/1643/3560/64332/3479/890/6935/7185/64919/2078/8013/4211/55589/1848/60  
/7099/2353/6372/3576/114548/710/5594/3659/4615/840/3678/3553/717/51135  
4318/6401/5594/3600/1906/3659/3627/7185/9252/1326/8809/9021/9586/3726/7424/11035/840/3  
09/3460/7099/2353/5579/2215/3126/3123/3119/653361/3118/3122/3112/5594/65108/3717/6772/  
6/3123/3119/3915/3118/3122/3112/5594/3717/6772/4615/3588/51135/3117/4792/3459/7042/704  
79/3553/23765/4792/6364/7187/3934/10758/6374/6354/5743/3458/4790/9641/6885/53342/4314/  
3119/3560/3118/3122/3112/920/5594/3717/6772/5533/4853/5530/3516/3117/4792/3459/7535/91  
840/3553/4792/58484/4790/4671/841/7100/1195/10767/3593  
20/2919/51554/6375/6372/3576/6846/6373/3560/6363/6351/1236/8807/6356/1524/10563/3627/6  
4/29126/10538/3717/6772/5533/4615/5530/4792/3459/7535/6774/916/27040/3091/4794/3458/47  
/6547/71/3696/6442/784/7170/4000/4624/7169/3688/487/5350/4625/1674/60/1756/779/786/463  
3383/10627/399/4318/5908/653361/87/58494/4313/103910/9076/1003/7412/83700  
123/3119/3133/3118/940/3122/3112/3134/6444/3105/5551/3107/3117/8672/3106/3135/3125/312  
518/5594/10235/5500/1278/8605/103910/5321/5592/2149/108/4659/2776/71/3710/5742/5290/22  
4/5533/5530/10990/11006/4792/4794/3635/4790/5777/5290/25780/118788/4893/5534/3551/108  
5229/2197/6189/6135/6187/6130/6203/6154/6166/51187/6138/6191/6123/6124/6230/6143/6194/6  
/131873/3685/3694/9899/7060/3918/3696/7148/1284/3688/3910  
47/71/3696/53632/6442/784/7170/4000/4624/7169/3688/487/4625/1674/60/5565/1756/779/786/  
108/2209/3683/3383/1675/2215/3126/3123/728/6403/3119/6404/3118/3122/3112/717/2214/3117

74/3108/2209/917/925/915/3126/3123/931/913/3119/3563/3118/952/3122/3112/948/920/910/367  
361/5594/8605/5321/10096/65108/2214/10095/9846/27040/7454/3635/8612  
348/6349/414062/8792/3383/2920/2919/3126/6372/3576/3123/3119/3118/940/3122/3112/10312/  
3119/3560/3118/3122/3112/920/5594/3717/6772/5533/5530/3553/3117/4792/3459/7535/6774/91  
3/1326/5530/4690/5062/4792/7535/916/5063/27040/4794/3458/4790/29851/6885/5777/5290/489  
579/3383/2920/1540/2919/7188/3576/6363/6351/23586/7185/4615/3553/51135/7412/4792/7535/  
3/6349/414062/3576/6373/6351/3455/5594/3665/3627/6772/1326/4615/4283/3553/51135/4792/7:  
59/22808/6772/5533/5530/3553/26253/4792/10379/4046/5743/5971/4790/9641/3710/53342/5290.  
13/1278/1906/3717/6772/5054/7424/3553/7412/7042/7043/6774/7048/4790/4087/5290/7046/102  
915/5332/1281/5272/1282/87/1278/910/338382/3553/1511/7042/7043/3458/7414/2776/4790/391  
3576/5332/5594/5054/4615/355/3553/51135/4792/3459/7042/7043/916/7048/3458/2776/4790/40  
9/3118/940/87/3122/3112/2903/729/717/6737/2214/1511/3117/3125/3127/6632/3458  
082/6401/1311/948/4615/3606/3553/7412/7042/7043  
'3112/8807/6772/8809/3606/3553/3117/3459/7042/7043/6774/3125/3127/50615/3594/3458/3566/  
/3122/3112/3600/3117/3125/3127  
/3553/3105/5551/3107/3117/3106/3135/3125/3127/3458/5799/1363/941/3593  
2/3134/355/3553/3105/5551/3107/3117/3106/3135/3125/3127/3458  
/355/3105/5551/3107/3117/3106/3135/3125/3127  
9851/3718/84876  
/355/3105/5551/3107/3117/3106/3135/3125/3127/3458  
17/3125/3127

)

/54490/9365/6652/51181/27294/51084  
3327/54490/224/223/219/9365/55586/217

945/38/8802  
{1/23464/55349/9380/4128/4129/132158/1757/275  
'220074/2806/221/7306/2184/2805/4128/4282/4129  
2571/4329/217/1892/84735  
{92/65985/38/3155/622  
02/50  
7165/443/2875/339983  
{8/50/132158/275  
'217/1892/2639/36/38/1632  
{577/217/1892/2639/23498/26/4128/55526/883/38/4129  
37/2806/2805/2937/1491/4357/84245/3945/7263/883/55256  
'10449/219/18/549/259307/56922/5096/34/30/593/4329/217/1892/36/65985/38/3028/3155/3712  
3/3945/38/197257/3029  
{6/2805/4843/217/26/384/84735/4128/112817/4129/112483/5625  
/1353/4701/4696/4700/4715/1340/374291/6391/4713/4706/4705/4702/7386/4709/4695/4697/510  
359/8694/51109/54884/157506/130/1551/10901/317749/54490/1576/1548/54905/145226/8608/15  
28/54575/2938/218/222/130/1553/8574/4258/373156/2947/374875/54490/2052/2940/1576/221/1  
/384/5313/5211/95/2875/3418/50/162417  
'167/189/6391/8801/4191/84706/4524/2203/5091/113675/229/5232/3417/3421/1962/4967/5095/1  
'10497/535/245972/527/50617/6540/525/5864/6539/245973/155066  
8/221/80201/217/55902/130589/84532/5313/3945/5211  
30/54577/128/54575/2938/218/222/130/4258/373156/2947/54490/2940/1576/221/1548/2329/156  
'5568/54578/54658/54657/54577/760/54575/57835/3781/6522/6580/8671/6555/1244/476/358/10:  
{54/283927/3417/55825/55670/196743/10901/1610/373156/51268/1962/11264/51179/2053/5830/  
12/54576/7390/4351/54578/54658/54657/54577/54995/29968/204/54575/9249/8836/2990/2643/5:  
2/4726/3643/4701/4696/4700/4715/5296/1340/374291/5563/6391/4713/4706/5465/4705/4702/5:



3/57521/111/6602/285521/126129/126328/63976/114/1327/6390/8110/56901/10818/4698/155/65  
7/7280/5438/54205/10383/25981/8408/7381/5331/246721/347733/4728/1347/6389/5602/5609/2/  
791/2335/10161/5728/5156/3082/3915/3560/3563/1311/285/1282/2790/3455/5594/3479/1278/91  
908/5332/285/54518/5594/10235/3479/6237/2903/51466/57568/80310/22808/1268/55740/5216/  
05/5321/5533/5530/6263/108/4659/5743/1026/782/4660/2776/71/6261/3710/53632/5021/4882/7  
2/7533/9021/91543/4599/355/7534/4792/10379/6774/7187/1965/1026/3458/6041/8554/4938/479  
88/10459/1499/10163/60/63916/867/8218/10092/10094/387/26052/5879/998  
93/472/1026/891/2810/841/8493/51246/896/1021/4193/143686/6477/8797  
592/113457/112714/5159/108/7278/5154/2776/3710/2771/2773/4893  
5684/5710/5718/5686/5719/5691/9861/5688

/6338

1616/197322/51102/9524/1962/35/10449/9374/34/30/1892/27349/84869/36/7923/38  
3352/5153/2784/773/2914/954/8645/6340/6337/22953/2911/6338  
284/8644/6820/1551/6716/374875/54490/1586/220074/1576/1585/79154/7923/3291  
96/645745/4494/476/55630/55503/475/1181/7421/6569/65010/486/482/481/113235/340024/142  
54577/128/54575/2938/218/222/130/1551/1553/4258/373156/2947/374875/54490/2052/2940/15  
11065/7318/7322/4591/55120/5371/10054/8554/55236/9039/672/140739/29945/26259/64750/1/  
313/1906/1003/3553/7412/6613/4205/3685/387082/3458/5154/1843/71/4790/2949/6885/5290/85  
90/9641/51082/29110/3551/10623/10622/10621/8737/3569

424/4792/1910/108/7048/4790/4087/2769/5290/7046/399694/1284/2771/468/2773/4893/10000/5  
3685/7187/5743/1026/4790/3918/5290/1027/1284/3551/3688/3910

4/2555/56901/22999/4698/4717/3762/5568/2562/5331/776/4728/5602/2560/4722/6300/4726/470

40/10950/167227/54464/5393/29883/9337/196513/57819/51691/51013/9652/2027/25904/22803/1  
72/4176

38

38

56963/5933/4090/3399/4087/653/7046/9241/650/657/130399/64750/285704/6198/5515/4089/9/  
56/27330/5296/9894/64223/5170/5563/83667/5595/5291/84219/4041/2475/6009/6520/6199/929  
7280/54205/10383/7317/7381/347733/91860/4728/1347/6389/5602/25828/7384/818/4722/598/  
116255/1056/224/223/219/57104/217/5407/56894/80339/132158/26007  
88/487/89/1499/1674/60/1756/779/786/55799/6932  
937/3418/119391/26873/124975  
160/55131/2091/10799/5901/28987/1736/54464/29102/84135/51119/4931/55781/51077/79631/1/  
990/3145/210/54490/124454/2235/326625  
577/54575/2990/1807/2938/4832/151531/4258/2947/83549/54490/2940/1576/8824/51733/1548/  
4/1892

/5156/4318/1643/3082/3915/3560/3563/5332/1282/2790/817/3455/5594/4313/3600/10235/3479/  
/317/23586/3717/6772/7752/3134/4615/9021/284406/355/162993/3678/339559/3553/3105/3107/  
52/1326/4615/5530/7424/355/3553/5159/51135/5062/1848/7042/994/7043/6197/1849/5922/7048  
3372/3576/6846/6373/3560/3563/6363/608/6351/3455/1236/920/3600/8807/939/6356/1524/1056/  
/6237/203068/103910/10096/4615/391/5216/3606/11035/3839/840/338382/29109/3836/3553/113  
124/1292/3678/131873/5159/5062/3685/3694/5063/4659/7791/5154/7414/4660/71/7060/3918/36  
58/4316/920/5594/3600/5925/890/9134/5533/3134/5530/9586/7538/996/5423/3105/3107/3117/4  
7/3316/7042/3685/2535/7474/6774/7074/3091/27250/4659/1026/4660/2247/7078/71/8324/1655/  
/3678/3553/4792/10095/7322/472/58484/7414/71/4790/3710/6885/7336/5290/3101/4671/7100/2  
36/1839/11224/23586/3627/6136/6772/729/4615/6224/23521/4599/3553/717/6868/6188/6175/51  
30/9586/11214/355/3553/3588/3105/3107/4792/3106/3135/3685/6774/108/6891/5734/5743/102  
05/3107/51135/5062/4792/3106/3135/200316/916/5063/6891/472/891/2776/85363/4790/3710/6  
5/5925/890/9134/3665/9636/317/6502/23586/3627/6772/3134/4615/3516/355/3105/3107/51135/  
'3717/6772/64499/3838/4615/9021/91543/3606/4599/355/7177/3836/3553/51135/3117/4792/103  
/2149/5159/5062/10095/3685/3694/85464/5063/7074/4659/5154/7414/4660/2247/71  
06/840/355/3553/113457/112714/2149/6188/51135/4690/5062/4792/10095/5063/7278/71/4790/6  
3455/5594/3665/6772/4615/3606/11035/90550/10010/3553/10135/51135/4792/10379/9051/1062  
35/6774/7187/5922/5966/1026/4790/5933/7532/9519/5290/3718/1027/9759/841/468/4893/2293  
606/6607/79023/10250/55706/25929/8667/9984/5411/1975/9818/8661/79760/7919/1967/7175/2  
8494/920/29126/9076/3134/1003/257194/3105/3107/7412/83700/3117/3106/3135/3685/201633/  
13/6774/7187/7048/64135/1026/4790/9641/6885/5290/3718/7046/5111/841/468/4893/29110/355  
'3458/3566/5154/8554/3953/53342/5777/3597/9466/1441/5290/3718/8027/5617/338376/10401/3  
5/6197/27040/7454/58484/2776/71/4790/6885/5290/7456/29110/3551/3688/10163/60/63916/100  
3/64581/817/3122/3112/10312/3687/5594/317/3717/6772/5533/4615/5530/3606/3553/26253/358  
33/5332/653361/2790/6351/1236/5594/10235/6356/1524/10563/3627/3717/6772/6368/6355/4283  
'2214/3459/3106/3135/7535/27040/4277/4068/117157/3458/3823/5777/5290/399694  
'6774/4325/27250/472/5743/1026/5154/648/7078/4790/3925/5290/672/1788/1027/7148/399694/  
5/4174/9126/9184/4172/991/4176/8379/4089/896/1021/4085/8900/4193/8881/64682/23594/109  
53361/3133/3118/64581/84790/3122/3112/81035/10312/948/203068/3134/338382/3678/113457/  
790/3710/142/5290/4000/841/468/4893/4217/3551/332/1521/7132/1616/60/143/10000/9020  
391/4790/5933/3710/4087/5290/7046/4893/4683/5534/23411  
07/4792/10379/3459/3106/3135/6774/7187/131450/4277/3091/5743/1026/2247/4790/9641/3710/  
'9984/58517/7919/10286/9416/9775/55110/10465/55696/1665/6427/57187/51340/27316/84991/2  
46/3718/5837/29082/841  
'5530/3726/3553/10990/2214/11006/4792/10379/3459/7042/9846/7048/3458/5971/4790/6885/52  
379/6774/916/7187/1965/64135/51209/4938/4790/9641/6885/440275/5290/4940/3718/1027/103

'6891/3458/5993/3823

4/4086/5081/7048/472/5966/1026/25942/2005/5154/648/5371/1655/4790/2138/1027/51274/4314

355/3553/7412/4792/6364/7187/6374/5743/4790/6885/5290/4314/841/468/4217/3551/7132  
'4615/3553/2214/51135/3117/4792/3459/7042/7043/3125/3127/5743/3458/4790/6885/5777  
13/6774/3125/3127/4261/3458/4790/6885/3918/2771/841/2773/3551/3688/3910/7132/3593/5294  
'841/29110/3551  
6/3125/3127/27040/3594/4794/3458/3566

3368/8809/3606/6355/4283/3588/6358/6364/6374/6354  
'90/5777/5290/4893/5534/3551  
3/55799/196883/5567/2778/7134/22801/3679/109

7/6445/71/6442/841/4624/941/4625/60/1756  
36/4638/84876/2771/2244/2773/3688/5294/6786/60/695/5906/10000/7408/5501/387/1277/19688  
92/695/10000/975  
3192/6125/6134/6144/6146/6122/6228/6201/65005/6168/140801

4633/55799  
'3125/3127

78/3553/951/3117/916/3125/3127/3566/2323

'3600/3606/3553/3117/7042/6364/7043/3125/3127/6374/3458  
6/3125/3127/27040/50615/3091/3594/7048/4794/3662/3458/3566/4790/4087/53342/9466/3718/7  
3/5534/3551/10892/10000/9020/8440/387/1493/5603/998/5588/2534  
'7187/27040/472/5743/5971/4790/6885/142  
187/4790/9641/6885/5290/841/7100/29110/3551/941/3593  
/841/4893/5534/3551/10892/3593/1263/10000/9020/4193/387/3569/64170/5603  
?7/1284  
8/2769/5290/1284  
87/2769/5290/7046/2771/841/2773/3551/7132/3593

'4790/4087

)79/495/1537/4720/4704/10975/4718/9167/64077/9296/29796/4714/4694/1350/127124/529/2708  
555/8228  
548/1565/1555/873/22977/119391/27294

3470/51179/35/48/2806/5096/80201/2805/4329/2731/55902/1892/84532/55753/414328/5313/521

5/1555/4128/119391/4129  
7/54490/9376/2052/6256/123264/1576/8431/486/482/10864/200931/481/10998  
'5192/10005/30/4843/5264/26063/1384/3418/3155/4598/92960/5827  
51109/3145/9104/112724/4832/3242/10327/250/8564/5372/125061/51004/4143/4337/210/587/90  
291/7386/4709/4695/4697/51079/1537/4720/4704/10975/6256/4718/9167/29796/4714/4694/1350

260/4717/5568/7381/4728/1347/6389/1376/51103/7384/51287/4722/6300/4726/1353/3991/2629:  
878/7384/4722/160/4726/5439/3064/4701/548644/4696/4700/10540/5441/6647/4715/161/1340/3  
34/374/3371/80310/3717/7533/9586/7424/1292/4170/3678/9180/131873/2149/4602/5159/7534/8  
7424/2149/5159/9771/27040/108/7074/51735/5154/2776/2247/71/5900/5898/2846/5290/25780/2  
84/4638/2771/2773/4893/5534/140465/5294/60/5565/779/10398/786/5501/55799/387/196883/55  
0/7532/9641/440275/5290/4940/841/4893/29110/3551/7132/1499/7529/10000/5515/975/1021/56

680

76/221/1548/873/883/119391

0401/9320/867/991/51366/4734/4193/4214/8881/26272/7324/64682/6477/9616/11059/7316

59/657/4217/3551/7132/1499/60/10000/7184/92/387/6612/9181/5603/5879

59/408/1277/196883/5567/2778/5603/59345/1385/4312/64764

01/5578/4696/4700/222236/4715/374291/5595/4713/4706/2915/2784/4705/3760/4702/773/4709/4

170506/22894/219988/23404/87178/5214/80349/5213/255967

2/4093/387

6/10542/8322/79109/2887/79726/127124/529/5582/220441/525/55615/7477/55437/7479/245973

9927/4726/4701/4696/4700/4715/1340/374291/5715/6391/4713/4706/842/4705/4702/7386/4709/4

0885/9724/23195/22803/7514/10556/51096/10557/10482

7172/119391

'5925/890/9134/6789/1906/317/6502/3717/6772/4853/7185/9252/7424/840/355/8453/2149/5159/  
/51135/5199/3117/4792/10379/3459/3106/162966/3135/219749/390980/7187/79230/3125/3127/1  
3/2005/5154/782/2323/2247/1843/5971/4790/6885/3925/25780/7046/8817/784/5921/11184/468/  
3/3627/6368/8809/3606/6355/355/9180/4283/3553/9235/94/3588/58191/6358/23765/3459/7042/  
3457/112714/3831/6188/51135/57381/4792/10095/3840/5063/7278/58484/51209/71/4790/6885/5  
96/5290/7148/399694/1284/859/4638/3688/3910/1499/29895/60/5906/10000/10398/7408/4633/5  
792/3106/7042/3135/7043/4488/916/3125/3127/108/7048/2113/472/1026/2005/706/5971/4790/4  
'3710/4087/7483/5777/5290/286/859/11211/4893/3688/3593/6194/1499/7472/60/29102/6198/86  
9110/11146/3551/3688/7132/10892/22863/10163/29895/60/9265/6198/63916/3098/10000/10398/  
135/6142/4792/10379/25873/6193/6774/7187/6159/6229/2197/64135/6189/6135/6187/6130/6203  
3/2776/4790/3710/5290/5732/2771/841/468/2773/4893/29110/5534/3551/1230/7132/1499/3570/  
385/5290/2771/841/2773/4893/29110/5534/3551/7132  
3117/4792/10379/3106/3135/6774/916/7187/3125/3127/8819/6891/4794/1026/25942/5971/4938/  
79/3459/7187/3125/3127/4261/1965/64135/3458/6041/5371/29107/71/4938/4790/9641

885/2846/5777/4671/841/7100/7456/3551/3688/7132/10006/10163/60/9265/7082/10802/4430/10  
3/7187/58484/6041/22900/4938/4790/9641/3710/6885/115361/4940/5027/140609/4671/841/2911  
3/7529/3572/991/8379/896/1021/8900/5610/5315/4193/387/5567/5700/5879/1385/10971/998/647  
3435/9775/55110/6612/9086/55746/9972/57187/51808/8891/96764/9688/7514/8087/10556/1917/  
3125/3127

1/332

593/3570/3976/3572/10000

00/10092/10094/387/3569/5603/5879/998

3/2214/51135/3117/3459/7042/7043/4046/3125/3127/4261

/58191/6358/4792/6364/6774/7454/108/7074/6374/6354/2776/4790/1235/5290/3718/399694/277

9759/27086/4893/3551/23411

71/1871/4171/545/1031/7157/983/2033/2932/5934

'112714/3105/3107/2214/3117/3106/3135/3685/3125/3127/6891/7278/4481/71/8411/7060

'5290/841/4893/29110/5534/3551/1230/7132/22863/1499/5294/3572/10000/1021/64422/5610/69  
'9896/55660/3190/11325/6628/84950/6636/6426/25949/6428/10772/988/6432/51729/6434/10450

'90/7046/2355/126014/5534/3551/10326/7132/8600/695/10000/9020

99/841/29110/3551

†

3/2243/5567/2778/5603

'046/5534/3556/3551

9/535/245972/1329/527/50617/4723/525/1337/9377/1349/245973/155066/1351

.1/2875/3418/38/8802/50/132158/26007/275

54/54490/6470/224/124454/219/205/2356/248/145226/2937/249/217/53354/2235/23498/23475/1  
V/27089/6720/1329/5313/2931/4723/1337/51085/9377/1349/1351

1/4701/6195/4696/4700/4715/27330/1340/374291/64223/5606/5563/6391/4713/4706/353500/470  
174291/146754/5715/6391/4713/4706/9001/842/2915/4705/148327/4702/7386/2880/4709/4695/4  
3115/3685/3694/1026/3566/5154/2323/2247/4790/7532/7060/2846/3918/3696/1441/5290/672/37  
3683/8817/2771/2773/4893/3688  
567/2778  
510

4695/4697/51079/107/4720/4704/4718/747/4714/4694/57406/5582/4723/2911/2166/2788

4695/4697/51079/1813/10131/1537/147700/65018/4720/4704/10975/4718/9167/79861/29796/47:

'4792/3459/7042/3685/7043/2535/1910/7474/6774/7187/108/1909/3091/3594/7048/2113/5734/5'  
l965/10780/6891/10793/64135/94039/3458/641339/6041/148156/5371/7773/10189/84671/4938/5  
4893/5534/4217/3556/3551/7132/1616  
6364/7043/85480/3557/50615/3594/7048/6374/6354/8771/3458/3566/3953/944/53342/3597/1235  
898/5290/388/55770/4671/841/7100/3551/3799/7132/10006/1499/79443/29895/5294/60/9265/86  
501/896  
.087/9519/5290/701/3718/7046/4487/468/5901/4893/29945/5534/2114/3551/7132/4801/10000/91  
7/10000  
'23048/4633/10092/4193/11335/10094/387/8737/9181/5603/5879/998/7316/5588  
/6154/6166/51187/4938/4790/9641/6885/6138/5290/4940/2266/6191/6123/4314/6124/6230/224  
3198/10000/1021/4193/387/196883/5567/8737/3569/2778/5603/59345/5879/1385/1871/64764

'4790/9541/9641/6885/5290/4940/3718/1027/841/29110/3551/22938/965/695/10000/9020/5706/4

092/10972/10094/8440/387/8737/10427/9181/3569/5603/8797/5879/998/2534/1365/8743/4691/!  
.0/3551  
'64/2961  
'11218/1983/10557/1977/10482/8666/51068/5903/10460/8563/10289/65109/23191/1968

'1/5197/2773/4893/3551/1230

32/57580/3569/5603/59345/5879/1385/7316/1871  
/6430/51639/9879/6635/2521/9343/23450/84844/3312/6431/9716/51503



.723/8566/349565/554235/5313/326625/57026/55163/93100/6697/80347

05/148327/4702/51548/7386/4709/4695/4697/51079/493753/51241/107/2475/6009/25915/123096  
697/51079/5432/4294/1387/2475/1537/27019/2902/147700/4720/4704/10975/5435/4718/9167/27  
18/1027/7148/1284/8817/5617/118788/468/4893/3551/3688/3910/6194/3570/5294/7529/6198/10

14/4137/4694/1350/27089/810/1329/292/4128/4723/1337/4129/9377/1349/118424/1351

743/1026/3458/3566/5154/2323/5371/2776/2247/26508/8324/4790/2949/5900/4087/7483/5898/2  
51427/7633/4790/9641/6885/284307/7574/90321/440275/163227/29915/5290/282890/4940/12601

5/9466/1441/653/7046/5617/650/338376/3604/5197/657/130399/3556/1230/7132/3593/4050/357  
555/63916/1781/10000/10398/7184/4633/10092/5287/6932/10640/64746/10094/387/51143/11257

184/9020/991/8379/4089/896/4085/8900/4214/196883/8881/5567/3569/64682/1385/1871/64764

4/29110/3551/6143/7132/3593/6194/3570/730/6192/6125/6134

1734/896/1021/8900/5707/5610/4193/930/8737/3569/5700/10213/5603/5879

3267/2768



/1537/4720/4704/10975/4718/9167/6199/57104/29796/4714/55811/4694/1350/4878/27089/1329/  
'113/79861/29796/4714/10126/1742/4694/1350/5437/27089/1329/10891/292/4723/10120/1337/9:  
0000/5515/4254/7184/1975/896/1021/4193/930/1277/3914/5529/3569/5649/59345/5879/1385/109

846/3918/3597/1441/8202/5290/3718/25780/7046/1027/5732/1284/8817/11211/650/7170/2771/8  
7/65243/389114/80110/57209/9831/7559/84527/841/146198/7767/7673/29110/84924/3551/2615

3/8600/3976

4/8737/3569/2316/1783/5603/8797/9648/5879/998/51164/8743/10121



'10891/84987/4723/1337/9377/1349/1351  
377/1349/3766/1351  
}71/2249/64764



41/4436/2773/4893/2736/3551/3688/332/3910/1488/3593/1499/7472/3570/6198/867/3572/10000  
2/7594/90317/7132/57547/1616/3593/115509/81931/342909/162655/10172/90649/163081/10000





)/185/4254/7184/405/4089/896/1021/8900/6932/367/5979/4193/5888/387/7175/3914/196883/556  
)/7695/58500/7571/147929/349075/7562/5501/345462/30832/140612/147923/10224/91661/7596/





37/3595/3569/4292/2778/59345/5879/4312/998/2249/1871/11040/7482/7296

'5610/90075/1967/163071/57693/54811/57711/7770/55769/91975/117608/3569/64170/55659/774







.8/6427/7639/7567/22835/8891/199704/7637/10520/6940/79788/55422/84911/7733/148266/8487.





4/7699/7771/329/57232/147694/148103/7157/121274/91120/79862/93134/27102/684/342926/25!





888/6426/3111/5970/7539/10482/163087/147660/7743/55786/58492/6428/7738/90987/147948/79







9088/3690/3716/3454/57677/125893/6432/6773/6850/7098/57573/148268/7553/162963
