# Supplementary material for: The Potential Diagnostic Value of Immune-Related Genes in Interstitial Fibrosis and Tubular Atrophy after Kidney Transplantation
Source: Hindawi journal article supplement (doi:10.1155/2022/7212852), 2022-06-17
Supplement: f1 [file 7212852.f1.zip]

| ID       | Description  | setSize | enrichment | NES      | pvalue   | p.adjust | qvalues  | rank |
|----------|--------------|---------|------------|----------|----------|----------|----------|------|
| hsa05200 | Pathways i   | 492     | 0.295736   | 1.616631 | 0.001095 | 0.00591  | 0.003437 | 4772 |
| hsa05168 | Herpes sim   | 427     | 0.439114   | 2.36653  | 0.001116 | 0.00591  | 0.003437 | 5822 |
| hsa05165 | Human pa     | 316     | 0.305755   | 1.602136 | 0.001172 | 0.00591  | 0.003437 | 3149 |
| hsa05014 | Amyotroph    | 305     | 0.289044   | 1.510376 | 0.001176 | 0.00591  | 0.003437 | 3896 |
| hsa05132 | Salmonella   | 244     | 0.456583   | 2.341669 | 0.001202 | 0.00591  | 0.003437 | 4126 |
| hsa04144 | Endocytosi   | 235     | 0.312757   | 1.598631 | 0.001205 | 0.00591  | 0.003437 | 3894 |
| hsa04060 | Cytokine-c   | 249     | 0.385874   | 1.982046 | 0.001206 | 0.00591  | 0.003437 | 1290 |
| hsa05163 | Human cyt    | 210     | 0.435654   | 2.200503 | 0.001238 | 0.00591  | 0.003437 | 3471 |
| hsa05171 | Coronaviru   | 195     | 0.529638   | 2.662479 | 0.001242 | 0.00591  | 0.003437 | 3149 |
| hsa05166 | Human T-c    | 211     | 0.504874   | 2.549485 | 0.001244 | 0.00591  | 0.003437 | 2675 |
| hsa05131 | Shigellosis  | 209     | 0.41623    | 2.096019 | 0.001247 | 0.00591  | 0.003437 | 3505 |
| hsa05169 | Epstein-Ba   | 194     | 0.584219   | 2.930995 | 0.001252 | 0.00591  | 0.003437 | 2796 |
| hsa05170 | Human im     | 191     | 0.431521   | 2.157866 | 0.001266 | 0.00591  | 0.003437 | 2288 |
| hsa05130 | Pathogenic   | 184     | 0.471388   | 2.346131 | 0.001269 | 0.00591  | 0.003437 | 3894 |
| hsa04062 | Chemokine    | 177     | 0.506104   | 2.511418 | 0.001271 | 0.00591  | 0.003437 | 2914 |
| hsa05152 | Tuberculos   | 171     | 0.530065   | 2.618164 | 0.001277 | 0.00591  | 0.003437 | 2682 |
| hsa05167 | Kaposi sarc  | 175     | 0.467968   | 2.316909 | 0.001284 | 0.00591  | 0.003437 | 3471 |
| hsa04141 | Protein pro  | 157     | 0.374081   | 1.823087 | 0.001294 | 0.00591  | 0.003437 | 4594 |
| hsa05161 | Hepatitis B  | 157     | 0.434555   | 2.11781  | 0.001294 | 0.00591  | 0.003437 | 3062 |
| hsa04218 | Cellular sei | 148     | 0.383753   | 1.856578 | 0.001295 | 0.00591  | 0.003437 | 4341 |
| hsa05202 | Transcripti  | 158     | 0.384418   | 1.87462  | 0.001297 | 0.00591  | 0.003437 | 4484 |
| hsa03013 | RNA transp   | 152     | 0.494621   | 2.404478 | 0.0013   | 0.00591  | 0.003437 | 5149 |
| hsa04530 | Tight junct  | 161     | 0.346522   | 1.692651 | 0.0013   | 0.00591  | 0.003437 | 3451 |
| hsa04621 | NOD-like r   | 161     | 0.524042   | 2.559783 | 0.0013   | 0.00591  | 0.003437 | 2366 |
| hsa05164 | Influenza A  | 162     | 0.563871   | 2.758962 | 0.0013   | 0.00591  | 0.003437 | 3149 |
| hsa05203 | Viral carcin | 161     | 0.494256   | 2.414285 | 0.0013   | 0.00591  | 0.003437 | 3114 |
| hsa04110 | Cell cycle   | 117     | 0.432473   | 2.016235 | 0.001309 | 0.00591  | 0.003437 | 4464 |
| hsa04071 | Sphingolip   | 116     | 0.360863   | 1.68211  | 0.001311 | 0.00591  | 0.003437 | 3471 |
| hsa05135 | Yersinia int | 130     | 0.496926   | 2.354542 | 0.001311 | 0.00591  | 0.003437 | 3505 |
| hsa03040 | Spliceosom   | 128     | 0.519514   | 2.456275 | 0.001312 | 0.00591  | 0.003437 | 4754 |
| hsa04145 | Phagosome    | 144     | 0.604152   | 2.908124 | 0.001312 | 0.00591  | 0.003437 | 3451 |
| hsa05160 | Hepatitis C  | 144     | 0.452304   | 2.177194 | 0.001312 | 0.00591  | 0.003437 | 3179 |
| hsa05162 | Measles      | 132     | 0.510052   | 2.419595 | 0.001314 | 0.00591  | 0.003437 | 3198 |
| hsa05418 | Fluid shear  | 132     | 0.412968   | 1.959045 | 0.001314 | 0.00591  | 0.003437 | 4712 |
| hsa04217 | Necroptos    | 124     | 0.485921   | 2.287571 | 0.001316 | 0.00591  | 0.003437 | 2832 |
| hsa03010 | Ribosome     | 110     | 0.400371   | 1.852194 | 0.001318 | 0.00591  | 0.003437 | 4820 |
| hsa04611 | Platelet act | 114     | 0.383861   | 1.779203 | 0.001319 | 0.00591  | 0.003437 | 3471 |
| hsa04380 | Osteoclast   | 122     | 0.534672   | 2.508196 | 0.001321 | 0.00591  | 0.003437 | 4214 |
| hsa04630 | JAK-STAT     | 139     | 0.347668   | 1.662914 | 0.001321 | 0.00591  | 0.003437 | 4429 |
| hsa04210 | Apoptosis    | 129     | 0.468533   | 2.214862 | 0.001323 | 0.00591  | 0.003437 | 3494 |
| hsa04650 | Natural kill | 119     | 0.554374   | 2.585454 | 0.001326 | 0.00591  | 0.003437 | 1731 |
| hsa04668 | TNF signal   | 108     | 0.542696   | 2.496026 | 0.001326 | 0.00591  | 0.003437 | 4214 |
| hsa05145 | Toxoplasma   | 108     | 0.571434   | 2.628201 | 0.001326 | 0.00591  | 0.003437 | 2675 |
| hsa04514 | Cell adhesi  | 136     | 0.537185   | 2.559873 | 0.001328 | 0.00591  | 0.003437 | 1450 |
| hsa04670 | Leukocyte    | 105     | 0.486268   | 2.220208 | 0.00133  | 0.00591  | 0.003437 | 3599 |
| hsa04933 | AGE-RAGE     | 99      | 0.454297   | 2.042336 | 0.00135  | 0.00591  | 0.003437 | 4214 |
| hsa04666 | Fc gamma     | 95      | 0.473854   | 2.112641 | 0.001351 | 0.00591  | 0.003437 | 4214 |
| hsa04659 | Th17 cell d  | 96      | 0.61612    | 2.751636 | 0.001353 | 0.00591  | 0.003437 | 3859 |
| hsa04660 | T cell rece  | 96      | 0.493805   | 2.205368 | 0.001353 | 0.00591  | 0.003437 | 4422 |
| hsa05142 | Chagas dis   | 97      | 0.506993   | 2.267071 | 0.001357 | 0.00591  | 0.003437 | 4214 |
| hsa04064 | NF-kappa     | 98      | 0.607275   | 2.720501 | 0.001362 | 0.00591  | 0.003437 | 2648 |
| hsa04620 | Toll-like re | 98      | 0.544364   | 2.438668 | 0.001362 | 0.00591  | 0.003437 | 3149 |
| hsa04625 | C-type lect  | 98      | 0.450391   | 2.017684 | 0.001362 | 0.00591  | 0.003437 | 4341 |
| hsa05146 | Amoebiasis   | 98      | 0.49209    | 2.20449  | 0.001362 | 0.00591  | 0.003437 | 3481 |
| hsa04640 | Hematopo     | 91      | 0.65766    | 2.907763 | 0.001366 | 0.00591  | 0.003437 | 1129 |
| hsa04061 | Viral prote  | 87      | 0.617044   | 2.715911 | 0.001376 | 0.00591  | 0.003437 | 1224 |
| hsa05222 | Small cell l | 90      | 0.448008   | 1.978366 | 0.001376 | 0.00591  | 0.003437 | 3481 |

|          |               |     |          |          |          |          |          |      |
|----------|---------------|-----|----------|----------|----------|----------|----------|------|
| hsa05235 | PD-L1 exp     | 87  | 0.506373 | 2.228794 | 0.001376 | 0.00591  | 0.003437 | 4214 |
| hsa05323 | Rheumatoi     | 90  | 0.631352 | 2.787997 | 0.001376 | 0.00591  | 0.003437 | 3272 |
| hsa04657 | IL-17 signa   | 86  | 0.421015 | 1.848356 | 0.001377 | 0.00591  | 0.003437 | 4364 |
| hsa04658 | Th1 and Th    | 86  | 0.612236 | 2.687863 | 0.001377 | 0.00591  | 0.003437 | 1611 |
| hsa04662 | B cell recep  | 79  | 0.487028 | 2.111269 | 0.001379 | 0.00591  | 0.003437 | 3042 |
| hsa04610 | Compleme      | 77  | 0.477925 | 2.062992 | 0.001397 | 0.00591  | 0.003437 | 3678 |
| hsa04612 | Antigen pr    | 77  | 0.716974 | 3.094862 | 0.001397 | 0.00591  | 0.003437 | 2796 |
| hsa03018 | RNA degra     | 69  | 0.447016 | 1.900848 | 0.001403 | 0.00591  | 0.003437 | 2985 |
| hsa05100 | Bacterial in  | 67  | 0.453939 | 1.919717 | 0.00141  | 0.00591  | 0.003437 | 3894 |
| hsa05133 | Pertussis     | 71  | 0.584187 | 2.489862 | 0.001414 | 0.00591  | 0.003437 | 2493 |
| hsa03008 | Ribosome      | 73  | 0.441636 | 1.88506  | 0.00142  | 0.00591  | 0.003437 | 4792 |
| hsa05150 | Staphylocc    | 73  | 0.697329 | 2.976449 | 0.00142  | 0.00591  | 0.003437 | 1032 |
| hsa05140 | Leishmania    | 74  | 0.697124 | 2.966292 | 0.001427 | 0.00591  | 0.003437 | 2826 |
| hsa05416 | Viral myoc    | 58  | 0.772023 | 3.151723 | 0.001451 | 0.00591  | 0.003437 | 826  |
| hsa04623 | Cytosolic L   | 56  | 0.436757 | 1.769941 | 0.001464 | 0.00591  | 0.003437 | 2752 |
| hsa05321 | Inflammatc    | 55  | 0.695687 | 2.806165 | 0.001466 | 0.00591  | 0.003437 | 2769 |
| hsa05134 | Legionello    | 57  | 0.592671 | 2.407956 | 0.001468 | 0.00591  | 0.003437 | 3325 |
| hsa05144 | Malaria       | 47  | 0.657733 | 2.582129 | 0.001481 | 0.00591  | 0.003437 | 2227 |
| hsa05320 | Autoimmu      | 44  | 0.7575   | 2.938145 | 0.001484 | 0.00591  | 0.003437 | 506  |
| hsa03050 | Proteasom     | 43  | 0.598605 | 2.296265 | 0.001493 | 0.00591  | 0.003437 | 3896 |
| hsa05322 | Systemic lu   | 48  | 0.769374 | 3.024588 | 0.001495 | 0.00591  | 0.003437 | 2675 |
| hsa04940 | Type I diak   | 41  | 0.744705 | 2.818062 | 0.001511 | 0.00591  | 0.003437 | 506  |
| hsa05332 | Graft-versu   | 41  | 0.831381 | 3.146058 | 0.001511 | 0.00591  | 0.003437 | 506  |
| hsa04672 | Intestinal ir | 42  | 0.663913 | 2.520162 | 0.001513 | 0.00591  | 0.003437 | 2675 |
| hsa05340 | Primary im    | 34  | 0.651069 | 2.36506  | 0.001536 | 0.00591  | 0.003437 | 1553 |
| hsa03030 | DNA replic    | 36  | 0.515901 | 1.902436 | 0.001538 | 0.00591  | 0.003437 | 5023 |
| hsa05143 | African try   | 33  | 0.569479 | 2.056526 | 0.00155  | 0.00591  | 0.003437 | 2227 |
| hsa05330 | Allograft re  | 33  | 0.833867 | 3.011296 | 0.00155  | 0.00591  | 0.003437 | 506  |
| hsa05310 | Asthma        | 23  | 0.813515 | 2.671741 | 0.001597 | 0.005987 | 0.003482 | 445  |
| hsa03060 | Protein exp   | 20  | 0.643217 | 2.032053 | 0.001608 | 0.005987 | 0.003482 | 3530 |
| hsa04151 | PI3K-Akt s    | 321 | 0.279877 | 1.468177 | 0.002342 | 0.008623 | 0.005014 | 3481 |
| hsa00340 | Histidine n   | 21  | -0.59772 | -2.09438 | 0.002591 | 0.00937  | 0.005449 | 6424 |
| hsa04140 | Autophagy     | 132 | 0.342328 | 1.623943 | 0.002628 | 0.00937  | 0.005449 | 4881 |
| hsa04744 | Phototrans    | 20  | -0.56767 | -1.92848 | 0.002632 | 0.00937  | 0.005449 | 5167 |
| hsa00410 | beta-Alani    | 28  | -0.52315 | -1.99016 | 0.002762 | 0.009729 | 0.005658 | 3621 |
| hsa04975 | Fat digesti   | 35  | -0.47234 | -1.90328 | 0.002793 | 0.009731 | 0.005659 | 4853 |
| hsa04742 | Taste trans   | 47  | -0.46143 | -2.0009  | 0.003058 | 0.010541 | 0.00613  | 4237 |
| hsa04740 | Olfactory t   | 73  | -0.38819 | -1.88289 | 0.003356 | 0.011445 | 0.006656 | 5167 |
| hsa04260 | Cardiac mi    | 68  | -0.41188 | -1.94305 | 0.003497 | 0.011801 | 0.006863 | 6039 |
| hsa04810 | Regulation    | 204 | 0.302093 | 1.521137 | 0.003713 | 0.012165 | 0.007075 | 3451 |
| hsa05205 | Proteoglyc    | 199 | 0.293673 | 1.474219 | 0.003727 | 0.012165 | 0.007075 | 4264 |
| hsa00190 | Oxidative p   | 98  | -0.46061 | -2.3563  | 0.003731 | 0.012165 | 0.007075 | 4850 |
| hsa04015 | Rap1 signa    | 194 | 0.311147 | 1.561005 | 0.003755 | 0.012165 | 0.007075 | 4399 |
| hsa04723 | Retrograde    | 121 | -0.31956 | -1.68644 | 0.004    | 0.012832 | 0.007462 | 4537 |
| hsa04115 | p53 signali   | 72  | 0.394005 | 1.677191 | 0.004267 | 0.013555 | 0.007883 | 5007 |
| hsa04714 | Thermoge      | 189 | -0.31008 | -1.76513 | 0.004717 | 0.014838 | 0.008629 | 5024 |
| hsa04510 | Focal adhe    | 196 | 0.300007 | 1.505764 | 0.004981 | 0.015519 | 0.009025 | 4214 |
| hsa04020 | Calcium sig   | 205 | -0.24901 | -1.43233 | 0.005102 | 0.015743 | 0.009156 | 2744 |
| hsa04120 | Ubiquitin r   | 132 | 0.328327 | 1.557523 | 0.005256 | 0.015937 | 0.009268 | 6151 |
| hsa04977 | Vitamin di    | 20  | -0.53178 | -1.80656 | 0.005263 | 0.015937 | 0.009268 | 3450 |
| hsa05033 | Nicotine ac   | 25  | -0.45658 | -1.68548 | 0.005362 | 0.016086 | 0.009355 | 5781 |
| hsa04080 | Neuroactiv    | 239 | -0.33612 | -1.97887 | 0.00578  | 0.017182 | 0.009992 | 3536 |
| hsa05220 | Chronic my    | 76  | 0.382513 | 1.646476 | 0.006964 | 0.020512 | 0.011928 | 4214 |
| hsa04622 | RIG-I-like    | 64  | 0.401198 | 1.67186  | 0.007163 | 0.020782 | 0.012086 | 3113 |
| hsa04664 | Fc epsilon    | 63  | 0.407044 | 1.685629 | 0.007184 | 0.020782 | 0.012086 | 4214 |
| hsa05020 | Prion disea   | 228 | 0.285526 | 1.449606 | 0.008589 | 0.024627 | 0.014322 | 3938 |
| hsa05206 | MicroRNA      | 163 | 0.306973 | 1.504104 | 0.009103 | 0.025871 | 0.015045 | 4452 |
| hsa05210 | Colorectal    | 85  | 0.337945 | 1.479271 | 0.009736 | 0.027429 | 0.015951 | 4694 |

|          |             |     |          |          |          |          |          |      |
|----------|-------------|-----|----------|----------|----------|----------|----------|------|
| hsa04721 | Synaptic ve | 68  | -0.31423 | -1.4824  | 0.01049  | 0.029227 | 0.016997 | 3471 |
| hsa05017 | Spinocereb  | 123 | 0.3106   | 1.458229 | 0.010554 | 0.029227 | 0.016997 | 5712 |
| hsa05212 | Pancreatic  | 75  | 0.358626 | 1.535824 | 0.01122  | 0.030808 | 0.017916 | 2497 |
| hsa00600 | Sphingolip  | 44  | 0.422452 | 1.638581 | 0.011869 | 0.032317 | 0.018794 | 3771 |
| hsa03015 | mRNA sun    | 88  | 0.339113 | 1.49185  | 0.012465 | 0.033657 | 0.019573 | 4865 |
| hsa04520 | Adherens j  | 69  | 0.36185  | 1.538698 | 0.014025 | 0.037555 | 0.02184  | 3891 |
| hsa04950 | Maturity oi | 19  | -0.52076 | -1.74736 | 0.015584 | 0.041388 | 0.024069 | 3153 |

leading\_edcore\_enrichment

tags=38%, 7852/6772/5880/6775/330/3575/3600/1439/10161/3560/1438/83593/4790/3601/4792/  
tags=55%, 3118/3113/3122/3108/3106/3115/3134/3135/3119/3126/3133/3109/3107/6352/3117/6  
tags=28%, 3106/3134/3135/3133/3107/3105/6772/3659/10379/4790/1282/1284/355/4599/5734/5  
tags=33%, 834/10376/84790/10189/71/7133/10010/2876/5687/10762/5216/79139/5879/79902/57  
tags=44%, 5788/834/330/929/197259/7097/10376/6188/29108/84790/837/4790/302/71/4792/307  
tags=32%, 3106/3134/3135/3133/7852/3107/3105/1234/3560/10109/10096/3310/387/58533/829/  
tags=23%, 729230/7852/6352/6347/958/10673/3587/6363/3627/1234/1524/6373/3575/3600/4283  
tags=39%, 3106/3134/3135/3133/7852/3107/6352/6347/3105/5880/3587/1234/6890/567/6351/47  
tags=48%, 834/1536/6347/6772/3627/713/10379/7097/2212/6188/6175/4790/4792/6187/714/512  
tags=38%, 3118/3113/3122/3108/3106/3115/3134/3135/3119/3126/3689/3133/3109/3107/3117/3  
tags=39%, 834/6352/3059/929/29108/837/4790/71/4792/10109/10096/92610/3553/387/960/1145  
tags=48%, 3118/3113/3122/3108/3106/3115/3134/3135/3119/3126/3133/3109/3107/3117/3105/6  
tags=31%, 3106/3134/3135/60489/3133/7852/3107/3105/5880/919/1234/200316/915/6890/567/7  
tags=45%, 834/3059/10376/2212/6188/29108/84790/837/4790/71/4542/4792/3071/10109/10096/  
tags=41%, 729230/7852/6352/6347/6772/5880/1794/6363/3627/1234/1524/6373/4283/3702/3055  
tags=39%, 3118/3113/3122/3108/3115/1520/3119/3126/3689/3109/3117/11151/6772/972/3587/9  
tags=40%, 3106/3134/3135/3133/3107/3105/6772/942/1234/10379/3055/4067/4790/4792/3459/5  
tags=40%, 3310/10130/6746/79139/23190/7991/6185/81567/9451/54431/5034/3703/27248/7184/  
tags=38%, 6772/6775/7097/4790/4792/7534/5579/4609/4773/23586/7529/355/6774/10971/5111/  
tags=40%, 3106/3134/3135/3133/3107/3105/83593/4790/4609/4773/6237/5728/3576/7048/5594/  
tags=42%, 958/942/330/929/3002/3560/3684/4790/2209/597/2313/64919/4609/2120/64332/1436  
tags=56%, 1973/6613/10189/10762/1207/3646/5901/8664/79902/4928/79023/9775/1967/23165/7  
tags=30%, 911/3059/913/10376/912/84790/71/10109/10096/387/5111/7408/9076/5879/87/10092  
tags=40%, 834/1536/6352/6347/6772/114769/2633/330/7128/115362/10379/3428/29108/837/263  
tags=50%, 3118/3113/3122/3108/834/3115/3119/3126/3109/6352/3117/6347/6772/3627/10379/3  
tags=43%, 3106/3134/3135/3133/3107/3105/7533/1234/10379/4067/4790/4792/7534/5366/387/7  
tags=48%, 7533/7534/4609/10459/7529/4176/9184/10971/10926/5111/8317/4172/9232/9126/888  
tags=34%, 5880/2207/4790/5579/2205/387/5728/10672/5332/5879/637/2773/259230/8560/1901/  
tags=45%, 834/6347/5880/925/3937/3932/2212/29108/4790/71/4792/10109/10096/3553/4773/38  
tags=52%, 9410/10189/57819/3310/6628/22938/10450/3190/9416/9775/1665/6426/10084/4686/2  
tags=48%, 3118/3113/3122/3108/3106/3115/1520/3134/3135/3119/3126/1536/3689/3133/3109/3  
tags=38%, 6772/7533/3627/10379/4790/4792/7534/4609/23586/7529/4939/4938/355/6774/4599/  
tags=46%, 6772/7128/915/10379/7097/3560/917/4790/4792/51284/2213/3553/10399/3310/23586  
tags=45%, 6347/5880/4688/6401/5175/4790/6613/71/653361/3553/7056/387/3383/7412/1906/58  
tags=40%, 834/1536/6772/6775/330/7128/10379/197259/29108/3459/3553/3460/8743/355/6774/  
tags=43%, 6188/6175/6187/6223/6193/6122/23521/6130/6203/51187/6191/6229/6125/65005/620  
tags=42%, 3937/2207/2212/4067/71/113/387/6916/4638/10672/7408/5908/5332/103910/10235/3  
tags=50%, 6772/3937/3932/4689/7305/10379/4688/10859/2212/2274/4790/9103/2215/2209/4792  
tags=41%, 6772/6775/3587/3575/3600/1439/10379/3560/1438/3601/3459/3574/5771/4609/3460/  
tags=39%, 1520/330/1439/10376/3002/84790/4790/597/71/4792/5551/5366/1075/1519/8743/355  
tags=36%, 3106/3135/962/3689/3133/3107/3105/5880/3937/919/3932/3384/3824/2207/22914/73  
tags=56%, 6352/6347/3659/3627/330/7128/3600/197259/6401/4790/4792/7133/3553/2919/2920/  
tags=44%, 3118/3113/3122/3108/3115/3119/3126/3109/3117/6772/958/3587/1234/330/7097/312  
tags=32%, 3118/3113/3122/3108/3106/5788/3115/3134/3135/3119/914/3126/3689/3133/3109/31  
tags=49%, 1536/3689/7852/5880/4689/3702/4688/3683/83593/5175/3684/71/653361/5579/399/3  
tags=43%, 1536/6347/6772/6401/4790/1282/1284/5579/3553/7056/6774/3383/7412/1906/3576/5  
tags=51%, 5788/5880/3055/2212/4067/2215/2209/2214/10109/10096/653361/5579/2213/1072/74  
tags=64%, 3118/3113/3122/3108/3115/3119/3126/3109/3117/6772/919/3932/915/3123/3560/479  
tags=53%, 5788/925/3937/919/3932/915/3702/4794/917/4790/4792/4773/387/7535/4690/10892/  
tags=52%, 6352/6347/919/915/713/7097/917/4790/4792/3459/714/3553/3460/355/6348/6349/41.  
tags=50%, 958/10673/6363/3932/330/929/7128/6351/4067/4790/597/4792/6366/5579/3553/2358  
tags=47%, 6352/6772/958/942/3627/929/6373/4283/7097/6351/4790/4792/51284/51311/3553/70  
tags=45%, 834/6772/3659/2207/10379/29108/4790/4792/64581/3553/4773/6237/387/114548/841  
tags=42%, 3689/911/913/929/7097/912/3684/4790/1282/1284/5579/3553/2919/2920/5272/3576/!  
tags=42%, 3118/3113/3122/3108/3115/3119/914/3126/3109/911/3117/925/913/929/915/3575/91.  
tags=40%, 729230/7852/6352/6347/3587/6363/3627/1234/1524/6373/4283/6375/6846/6351/3560  
tags=41%, 330/4790/4792/1282/1284/4609/5728/7185/3688/3551/7187/3673/1021/2335/7188/12

tags=55%, 6772/919/3932/915/7097/4794/917/4790/4792/3459/55509/4773/3460/6774/5728/753  
tags=52%, 3118/3113/3122/3108/3115/3119/3126/3689/3109/6352/3117/6347/10673/942/3600/7  
tags=47%, 6347/3627/7128/4790/4792/3553/2919/6356/2920/6372/3576/841/6426/3551/7187/68  
tags=44%, 3118/3113/3122/3108/3115/3119/3126/3109/3117/6772/6775/919/3932/915/3123/356  
tags=39%, 5880/10859/4067/4794/4790/4792/8519/5579/27071/2213/4773/118788/29760/5879/1  
tags=43%, 3689/713/3684/11326/2/714/716/1604/1191/715/7056/3078/3075/966/730/2149/3426.  
tags=61%, 3118/3113/3122/3108/3106/3115/5720/1520/3134/3135/3119/3126/3133/3109/3107/3  
tags=38%, 694/57819/10950/2023/9337/25904/80349/22803/55802/4848/26986/5394/54464/8418  
tags=46%, 3059/71/10109/10096/387/10459/5879/10092/9844/3688/2335/10552/858/5747/857/8  
tags=48%, 834/3394/3689/3659/929/713/29108/3684/4790/714/716/1072/3553/715/387/6372/11.  
tags=53%, 5901/1736/55813/22803/29107/2091/10813/28987/55272/51119/10557/23560/54464/8  
tags=45%, 3118/3113/3122/3108/3115/3119/3126/3689/3109/3117/713/3683/2212/3123/3112/36  
tags=66%, 3118/3113/3122/3108/3115/3119/3126/1536/3689/3109/3117/6772/4689/7097/4688/2  
tags=50%, 3118/3113/3122/3108/3106/3115/3134/3135/3119/3126/3689/3133/3109/3107/3117/3  
tags=36%, 834/6352/3627/6351/29108/4790/4792/3553/23586/9447/3606/3551/10623/8737/5434  
tags=62%, 3118/3113/3122/3108/3115/3119/3126/3109/3117/6772/6775/7097/3123/3112/4790/3  
tags=51%, 834/3689/929/7097/29108/3684/4790/4792/3553/3310/2919/2920/3576/841/3606/709  
tags=49%, 3689/6347/958/3820/22914/7097/3683/2995/6401/5175/3553/3383/7412/6403/3576/2  
tags=50%, 3118/3113/3122/3108/3106/3115/3134/3135/3119/3126/3133/3109/3107/3117/3105/9  
tags=56%, 5696/5720/5698/5699/5721/5687/5702/5689/3458/5685/5691/5686/5719/5682/5684/5  
tags=73%, 3118/3113/3122/3108/3115/3119/3126/3109/3117/958/942/713/2212/3123/3112/6737  
tags=54%, 3118/3113/3122/3108/3106/3115/3134/3135/3119/3126/3133/3109/3107/3117/3105/9  
tags=59%, 3118/3113/3122/3108/3106/3115/3134/3135/3119/3126/3133/3109/3107/3117/3105/9  
tags=62%, 3118/3113/3122/3108/3115/3119/3126/3109/7852/3117/958/10673/942/3600/3123/31  
tags=50%, 5788/958/925/3932/915/3575/6890/4261/64421/7535/100/29760/5993/3543/8625/689  
tags=64%, 4176/5982/5111/6118/4172/5557/6117/10535/5984/2237/4171/54107/4175/4174/5665  
tags=45%, 3620/6401/8542/5579/3553/355/3383/7412/5332/3606/3458/4615/2150/2776/7124  
tags=67%, 3118/3113/3122/3108/3106/3115/3134/3135/3119/3126/3133/3109/3107/3117/3105/9  
tags=65%, 3118/3113/3122/3108/3115/3119/3126/3109/3117/958/2207/3123/3112/2205/6356  
tags=60%, 23478/90701/3309/58477/5018/9789/6731/60559/11231/6729/28972/6726  
tags=28%, 7533/3575/10161/7097/3560/4790/1282/3574/7534/1284/54331/4609/7529/5728/1097  
tags=81%, 224/138199/4129/26/3176/4128/57571/221/84735/219/10841/222/223/144193/55748/  
tags=41%, 10010/6237/5728/81671/3091/64422/22863/3146/6885/9451/5594/5567/29982/51100/  
tags=70%, 805/808/5158/3000/2978/9626/1258/5148/2779/810/8787/6011/2979/6010  
tags=46%, 51733/8310/221/84735/54498/219/339896/222/223/35/55748/2571/218  
tags=60%, 38/5322/10999/5319/8694/4547/2168/5406/949/2169/8513/80168/84649/337/10554/1  
tags=57%, 255022/8645/775/3354/2554/5137/6335/1131/9033/5566/5330/2911/5331/80835/3355  
tags=48%, 805/808/283297/79541/79339/138804/26248/4992/26529/3000/26689/5137/158131/26  
tags=63%, 10975/845/4624/4625/782/4633/6547/59283/7169/7134/23439/1339/59285/785/1337/  
tags=31%, 3689/7852/5880/3683/3684/71/3071/10109/7114/10096/1072/6237/387/4638/10672/5  
tags=36%, 3059/7097/71/5579/4609/6237/387/960/355/6774/5879/8826/4060/406991/3688/3091  
tags=50%, 4704/1339/1337/479/9550/4725/84701/9377/4715/1346/374291/29796/4708/56901/47  
tags=37%, 3689/5880/3937/3683/83593/3684/71/5579/113/6237/387/5216/1436/7408/3397/5908  
tags=44%, 4725/2775/22999/779/2793/775/2892/778/774/5578/4715/374291/57406/2554/3763/4  
tags=50%, 5366/355/5728/841/637/64065/472/1021/4616/6241/11200/1643/891/64393/8493/101  
tags=39%, 126129/1352/53632/4704/1339/1337/84335/6009/2475/4725/84701/123096/29078/493  
tags=36%, 5880/330/64098/71/1282/1284/5579/387/4638/5728/7408/5908/5879/87/3676/3371/1  
tags=27%, 2767/5566/1950/2324/5330/816/2911/80271/85366/491/818/5331/3362/3706/340156/  
tags=52%, 330/9246/7318/8881/7316/140739/92912/4214/10055/51366/868/7323/9616/8453/732  
tags=55%, 113278/5406/949/80704/5948/337/151056/6573/335/25974/113235  
tags=64%, 2560/2893/2561/773/2892/774/2554/2570/8973/116443/2563/57030/2905/2902/1141/  
tags=40%, 4544/554/2918/4543/2570/2688/2689/6343/4295/8973/1131/11255/90226/623/7068/1  
tags=38%, 4790/4792/4609/1488/3551/7048/5594/1021/3065/4089/5925/4616/1027/8503/1643/1  
tags=36%, 3627/4790/4792/10010/23586/54941/3576/841/1540/64135/3551/9636/7187/6885/421  
tags=41%, 241/5880/3937/2207/4067/2205/5879/5321/7409/27040/5594/8503/3635/4893/7124/2  
tags=32%, 1536/6352/5880/4689/713/4688/10376/84790/714/653361/5687/3553/3310/5879/730/  
tags=36%, 4790/1545/9839/5579/4609/7431/387/960/6774/5728/4082/3371/3190/4170/406991/3  
tags=40%, 5880/5366/4609/387/5879/7048/5594/2353/4089/4616/8503/4436/1643/1499/572/514

tags=32%, 6844/6532/1759/6511/127124/245973/535/1212/57030/6531/10814/155066/527/5948!  
tags=50%, 5579/5687/5332/5702/5689/22863/2903/9519/29982/3516/7419/5685/5691/8503/2959  
tags=27%, 6772/5880/4790/6774/5879/9459/3551/7048/5594/3716/1021/4089/5925/4616/8503/1  
tags=43%, 7357/259230/8560/2720/253782/9517/8612/7368/55304/130367/8611/8877/91012/81!  
tags=41%, 10189/9775/4686/29107/2521/53918/64895/5411/26986/23283/5527/132430/11052/1!  
tags=39%, 5880/71/387/5879/87/8826/7048/6885/5594/4089/1495/10163/1499/283106/1457/745  
tags=58%, 4825/5080/3171/5313/5078/3651/2645/3170/3630/3172/6927

'3459/1282/3574/5366/1284/5579/54331/113/4609/3460/387/6789/355/6774/5734/5728/10672/14  
347/3105/6772/972/330/6890/567/10379/7097/3123/3112/4790/10189/4792/3459/10308/3553/23  
728/841/3676/4600/3371/3688/3551/9636/7187/7098/8323/3673/5594/3716/472/5567/1021/9519  
'02/4928/637/2882/79023/5689/23165/310/4686/84617/55860/22863/9451/220988/29107/2903/3  
1/10109/10096/399/4609/3553/6237/387/8743/114548/8767/5216/23643/3576/841/5879/3606/10  
'378/11031/10092/29082/84313/8724/7048/163/26286/8766/93343/50807/3799/51100/868/10552.  
'/1439/6375/6846/6351/3560/1438/3603/3601/7133/3459/3574/6366/3553/2919/3460/6356/2920/  
90/4792/5579/54331/113/4609/3553/4773/387/355/6774/5734/10672/3588/6348/6349/414062/35  
84/5579/716/51311/6223/3553/715/23586/4939/4938/6193/6774/114548/4599/6122/23521/6403/  
105/958/3932/915/3600/567/3683/3123/4316/3560/3112/917/4790/3601/4792/113/4609/4773/33  
48/8767/5216/3576/5332/5879/87/3554/3606/10892/10092/103910/9844/3688/831/3551/7316/22  
772/958/919/3627/7128/915/6890/567/10379/7097/3683/3123/4067/4794/3112/917/4790/4792/4  
097/25939/917/4790/4792/7133/5579/54331/1072/4773/355/841/5879/637/2773/3551/6891/6885  
'3553/387/8743/10972/355/114548/10672/9076/3576/4690/841/5879/3554/64005/3606/10092/368  
'/6375/6846/6351/4067/4790/4792/653361/6366/5579/54331/113/2268/2919/387/6356/2920/637  
29/2207/7097/2212/3123/3112/3684/4790/4360/9103/2215/2209/2214/3459/64581/4261/2213/35  
4331/4609/4773/2919/2920/355/6774/3383/3576/841/9976/5879/637/3551/7316/7187/7098/3091  
'7323/3309/55768/6748/3326/22872/27102/10483/23471/7321/5610/6500/10134/11231/6184/642  
'3576/841/353376/637/64135/3551/7187/7098/7048/1959/6885/5594/3716/4214/2353/7099/4089/  
'472/1021/5925/4616/7419/11200/8503/891/1875/3710/2309/23411/4893/1019/824/2113/890/592  
'/5090/3576/7185/8842/4086/3087/7048/7403/2521/472/3065/4616/5747/4211/1027/1025/8464/2  
'9760/4686/1968/29107/2521/9669/5411/9972/26986/387082/8487/10557/53371/57122/8892/231  
'/103910/3688/5567/4214/5564/4627/10552/7846/7430/51735/1365/10627/10095/3725/1739/4218  
'34/4790/4792/115361/10010/3553/2919/387/2920/64127/4939/4938/114548/8767/10628/10135/3  
123/29108/3112/4790/71/4792/3459/51284/5579/4261/3553/23586/3460/8743/3838/4939/4938/3  
529/6774/10971/22938/841/5879/87/7185/3190/6672/7187/5902/9734/1959/5594/3716/5567/102  
'1/472/1021/3065/4089/5925/4616/1027/11200/891/1875/994/6500/4171/996/64682/1019/4085/4  
'5594/1903/8503/253782/9517/4363/2776/5527/4893/7124/55304/2206/130367/2770/8877/91012.  
7/114548/7535/3576/5879/3676/3606/10092/9844/3688/3551/7409/8935/27040/6885/5594/2335/  
'20988/494115/23350/2521/6427/6430/3183/51645/55660/10772/55119/3192/6434/23451/84844/  
107/3117/11151/3105/4689/929/6890/7097/4688/10376/2212/3123/84790/3112/3684/4360/9103/  
'3646/10971/9076/841/4600/637/6041/3551/7187/7098/9451/5594/3716/1021/5925/3458/975/873  
'/4939/4938/355/6774/4599/841/4600/637/64135/3551/7187/6885/9451/3716/1021/2353/7099/93  
79/3554/3551/6885/2353/7184/858/5747/3458/387082/2950/3326/857/8503/1499/7124/652/3725  
'114548/841/353376/1540/637/29082/5321/7098/3146/3716/2752/7099/7188/6778/128866/3717/3  
'02/6201/6124/6142/6194/6173/6146/6136/124995/6143/29088/6135/6189/11224/6228/6132/2009  
688/2773/5321/2149/3673/5594/5567/64805/83706/8673/8503/10627/2776/3710/10125/2770/86  
'/2214/3459/653361/55423/2213/3553/4773/3460/1436/29760/5879/1540/3554/4982/3551/7048/6  
'6774/3588/4170/3563/3716/6778/3717/3458/3594/3597/8503/3976/122809/6773/5156/3718/946  
'/841/7185/4170/637/3551/3563/9451/5594/472/2353/7846/4616/143/8737/8503/8837/3710/572/  
05/3683/3002/2215/2214/3459/3821/3822/10870/5551/5579/4773/3460/8743/355/3383/7535/587  
'6372/64127/355/3383/7412/1906/841/7185/8809/3551/7187/7424/6885/5594/1326/6364/2353/71  
3/3112/4790/4792/3459/4261/3310/3460/6774/23643/3588/841/3688/2773/3551/6885/5594/3716  
07/3117/3105/958/942/925/3384/6402/3683/3123/3112/6401/5175/3684/3383/7412/6403/9076/3  
87/3383/7412/7408/5908/9076/5879/87/3676/103910/3688/2773/7409/4267/5747/7430/1365/850  
332/5879/7424/7048/5594/2335/4089/1285/3717/1027/8503/4893/7124/3725/1286/1019/1281/18  
08/4082/5879/10092/5321/7409/27040/5594/65108/50807/10552/8503/1398/3635/8612/10163/1  
4/3112/917/4790/4792/3459/3553/196/4773/3460/6774/7535/3554/3551/3091/7048/27040/5594/  
3551/7409/27040/6885/5594/1326/2353/868/3458/916/8503/4893/10125/29851/7124/3725/1739/  
4062/3576/5332/841/2773/3551/7048/5594/2353/7099/3458/9630/916/4615/8503/8837/2776/511  
6/2919/2920/3383/7535/7412/23643/29760/3576/353376/1540/3554/7185/10892/3551/7187/405  
96/23643/6348/6349/414062/3576/841/353376/5879/3551/7187/7098/6885/5594/1326/2353/709  
'/1540/10892/26253/3551/1959/5594/868/5971/8503/3710/6773/4893/7124/3725/6850/1960/529  
5332/87/3554/5567/2335/7099/1285/5747/3458/9630/8503/2776/7124/3912/3915/1286/3918/128  
2/3123/1438/3112/917/3684/2209/3574/1604/3553/960/945/931/1436/966/3676/3554/952/3563/1  
'/7133/6366/2919/6356/2920/6372/8743/8807/1436/6355/3588/6348/6349/414062/3576/3606/88  
85/5925/4616/5747/1027/8503/1643/51426/3912/3915/1286/3685/3918/1019/5290/317/836/1163

5/353376/29126/3551/10538/3091/27040/5594/3716/2353/7099/3717/3458/916/4615/8503/4893/  
097/3683/3123/3112/3553/2919/2920/6372/3383/6348/6349/414062/3576/3606/4050/6364/2353/  
85/5594/6364/2353/7184/7188/3458/3326/6280/3934/7124/3725/29110/3320/836/6374/5743/560  
0/4794/3112/917/4790/4792/3459/864/4773/3460/7535/3551/27040/5594/3716/2353/6778/3717/  
.0892/3551/7409/5594/2353/10288/975/8503/11025/3635/971/4893/3725/6850/10451/5777/5290  
/5329/710/3080/5265/629/729/717/718/2162/10877/2244/7450/4179/5054/2266/5327  
117/3105/972/925/3824/5721/6890/567/3123/3112/10437/3821/3822/4261/3310/5993/8625/6891  
36/23404/25804/132430/5214/9652/7832/219988/246175/51013/29883/9125/22894  
503/1495/1398/10163/1499/10095/391/5290/10097/10093/7414/63916/60/3611/867/10094  
4548/23643/3576/353376/3688/2773/5594/2353/7099/10392/710/4615/717/51135/718/7124/3725  
34128/55127/26354/283106/1457/51096/9724/134430/10482/29889/10199/79631/10528/10775/7!  
84/9103/2215/2209/2214/714/2213/716/715/2359/3383/2357/6403/3075/3880/3875/6404/3426  
212/3123/3112/3684/4790/9103/2215/2209/4792/2214/3459/653361/5579/3553/3460/3676/3688/  
105/5880/958/942/3683/3123/3112/71/5551/1604/3383/841/5879/637  
l/3665/11035/29110/103/10621  
459/3553/3460/64127/6774/8807/3606/8809/7099/6778/3458/3594/30009/7124/3725/3111/3125/  
9/4615/718/4671/7124/9554/1937/1195/7100/317/836/3593/5861/3312  
532/3606/7099/3458/975/4615/7058/7124  
58/942/3123/3002/3112/5551/355  
704/5700/5706/5714/5683/5718/5688/5710/5701  
/2215/2209/2214/714/716/715/6628/87/730/2903/3458/6741/729/717/718/7124/3111/3125/3127  
42/3123/3002/3112/5551/3553/355  
42/3824/3123/3002/3112/3821/5551/3553/355  
12/3601/3676/5284/608/56477/29851/3111/6387/3125/3127  
1/916  
5/4173/5985/79621/246243/5981/5427/57804/5422

58/942/3123/3002/3112/5551/355

'1/1436/118788/5879/3676/3371/4170/3688/3551/2149/3563/11140/7424/4254/3673/5594/3716/.'  
'443/218  
'8673/203228/10670/8503/8837/55014/572/11345/7405/4893/10325/4218/89849/29110/8678/105

208/376497/50487/335/1056/5407  
i/3351/9568/6338/5153/114/170572/6337/954/3352/2784/2914/22953  
3245/1258/5566/816/4993/123041/8392/818/26539/26740/26211/26476/2788/156/26664/26716/1  
'84701/4635/779/4634/9377/775/778/1346/29796/6548/9254/786/27091/125965/7381/783/7137/2  
216/5879/87/3676/8826/10092/103910/3688/9459/2149/7409/3673/5594/2335/4627/10552/3696/  
/8323/7409/27250/967/3673/5594/5329/5567/2335/7099/7474/858/5747/7430/857/6194/8503/16  
'31/4713/127124/245973/535/4706/4714/125965/4695/7381/4702/4707/4723/4718/155066/51079  
/2357/5332/9771/5879/10235/3688/2773/2149/7424/7409/4254/51466/27040/5594/2903/51735/8  
708/2570/56901/4731/4713/4706/4714/5566/4695/2563/5330/2911/4702/57030/4707/4723/4718/  
9/901/92344/8795/3486/317/836/983/2810/545/896/5054/6477/25898/7057/894/9134/27244/419  
3753/9377/5606/6196/4715/148327/1346/374291/29796/6598/4708/56901/4731/4713/4706/4714/  
03910/3688/7424/7409/3673/5594/2335/1285/3696/858/5747/3694/857/8503/10627/1398/1499/6  
'2064/8074/4914/5731/3360/8822/2905/5260/553/93129/107/6915/56413/4843/219931/810/155/1  
'8/1643/4281/7334/7321/6500/55236/9320/996/64682/55958/51465/22954/90293/29945/27338/2

'1137

87/83551/116443/7349/2488/4157/1815/5644/2563/2911/8698/23566/1135/9294/10316/1443/11!  
398/572/51426/4893/1019/5290/1487/9846/7040/867/7046/10000/5781/5293  
l/4/8737/3665/7124/1654/29110/9140/3593/9474  
206/8605/6850/10451/5290/9846/5603/2534/6416/10000/5293  
'5702/5689/84617/9451/5594/2903/3831/5567/3799/7846/3309/858/7419/5685/5691/857/8503/72  
551/27250/5594/472/1021/3065/2146/4853/7430/1786/1027/8503/1398/4363/994/23411/4893/27  
26/4893/5899/3725/4292/5290/836/4087/7040/2956/7046/10000/5293/2932/374/6934/6198/2606



55/6534/6512/6538/525/6530/160/23025/5864

)/5686/5719/5682/2776/3710/489/5684/5704/5700/8678/4217/5290/5706/5714/3708/5289/5683/1  
643/572/51426/5899/1019

537/8879/2717/55331/8613/5660

1051/65110/23708/5500/26019/5499/55308/1478/10482/1477/11269/10914/2733/81608/65109/23  
4/6591/5777/52/7414/7082/60/7525/10810/2534/7046/2033

136/1910/1906/3576/5332/841/5879/1488/7185/5732/637/10235/3688/2773/3551/7187/2149/356/  
586/162966/3460/4939/4938/355/79230/841/80264/5199/637/64135/148156/84527/57693/6041/  
/2335/3065/1285/3696/5925/7474/4853/5747/3694/3516/1027/8503/1499/1452/6696/7058/572/5  
831/2521/29982/3799/7846/3309/9972/53371/5685/5691/57122/203228/10121/5686/9688/5719/8  
092/4074/103910/9648/9844/3551/84617/55860/6885/5594/3831/8677/55770/51626/2353/3799/  
/9815/128866/858/9744/60682/64744/10015/857/51652/10565/6643/2350/116984/10095/57132/4  
/6372/8743/355/8807/1436/6355/3588/6348/6349/414062/3576/3554/3606/8809/1236/939/94/498  
/576/5332/841/5879/3554/5732/637/2773/3551/6891/5594/3716/5567/1021/7188/5925/5747/2791/  
/3576/6130/730/4600/6203/8829/64135/51187/6191/3551/9636/7187/7098/6885/5594/6229/3716.  
83/5728/9184/5901/2114/9232/3554/8829/3551/8881/7048/5902/1959/5594/3716/472/5567/4214  
/863/6885/5594/472/7099/10552/7188/7323/23048/10392/5747/4615/8737/10670/8503/10627/13  
609/7431/864/23586/4939/960/4938/355/6774/3383/29760/22938/841/5879/5702/637/3551/9636  
/5594/472/1174/2353/7099/7188/8905/5747/2791/916/9616/4615/8737/85363/8503/1398/891/27  
38/3551/2149/84617/6885/5594/2353/7099/4627/10552/7846/7430/10006/4615/8737/1365/23191  
2/6774/6355/5908/6348/6349/414062/3576/5332/5879/1236/10235/9844/2773/3551/10563/7409/  
/53/7096/3460/387/64127/8767/3588/841/5993/3606/10892/637/26253/8625/5594/3716/4801/709  
/64422/22863/5594/3716/1021/2353/5925/3717/4277/2791/8503/3665/1499/3710/6773/718/5610  
/15/7993/30001/51465/824/3320/6745/2923/4217/10427/1965/821/6400/55968/3312/573/468/987  
/6778/5925/3717/7419/4615/8503/3665/1643/572/6773/51135/64764/10488/4893/7124/1654/372  
/8/5500/5934/5499/3486/5290/983/10111/4683/545/4087/3708/5533/5603/896/5054/5534/7040/7  
130/1643/4300/4297/25942/2530/51426/1655/905/2078/5966/2005/890/1848/3207/3486/6760/96  
91/9688/8480/1977/96764/9984/8667/132430/55706/11260/6606/6607/65110/9631/1975/7341/5  
3/50848/1019/7454/1741/5584/4217/9475/1364/51762/10097/10686/10093/5562/7082/4628/60  
576/5332/841/9447/3606/6041/84674/3551/7187/9051/6885/5594/3716/22900/7099/7188/10392/  
/55/114548/3383/4599/3576/841/4600/3606/4928/637/64135/6041/3551/7187/7098/5594/29107/  
/1/9519/3065/7188/5925/2961/3516/1027/7419/8503/2965/2959/3665/572/718/5610/64764/1048  
/175/890/4174/5885/5934/5591/29945/983/2810/545/4087/4173/6502/7272/896/8454/7040/1027/  
/4217/8439/9475/5290/81537/8879/9846/5603  
/2353/7099/10552/9815/5747/4615/8503/5586/1398/10163/2776/51135/10095/7124/3725/7454/2/  
/27316/55696/9984/10286/6432/1655/25804/84950/9716/57461/9343/1659/5093/29896/8683/849  
/2215/2209/71/2214/64581/653361/2213/715/5879/4074/3688/6891/84617/3673/7099/7846/1781.  
/7/1365/8503/27102/3665/8837/1499/91543/572/6773/5610/4893/7124/1019/29110/3454/1965/5/  
/67/868/916/1027/4615/8503/6504/27102/3665/572/6773/51135/5610/8667/3725/283106/1457/10  
/3685/3320/3690/7341/4217/5290/5562/4205/4257/60/1003/5603/4208/4318/5327/1843/6416/51  
3458/7419/8737/3326/51652/8837/6773/5836/5610/11035/7124/57132/8605/824/3718/3320/3454  
16/51081/6138/6159/6217/64963/29074/6224/65008/11222/9045/65003/6134/51263/55173/2899/  
/05/54518/6850/3690/1281/2244/4659/5742/5500/5584/9475/5499/5290/7450/3708/60/5603  
3885/5594/3716/2353/5971/3458/10288/8503/11025/6773/7124/3725/1385/6850/3690/3454/5290  
3/3454/9180/5777/8835/5290/3593/3455/8027/3572/8554/3570/896/2273/2033/85480/3977/9021.  
4893/7124/3725/824/835/1521/4217/8795/1965/5290/317/836/3708/60/468/4001  
/9/637/4068/7409/27040/5594/3823/4277/3458/117157/8503  
/88/8737/8503/8837/3976/64764/10488/11035/7124/3725/9586/1385/4217/5290/836/6374/6376/!  
/7099/3717/3458/4615/572/51135/7124/3912/3915/3918/3111/2770/3125/3127  
676/29126/1462/9019/3688/6404/201633/965/79679/3696/4267  
/3/1495/10627/1499/7294/50848/2770/6387/10451/9475/5290/1364/10686/7414/60/1003/5603/4/  
/5/5290/836/4087/5603/5054/7040/7046/1958/10000/5293  
0095/8605/7454/8611/6850/8877/10451/5290/10097/10093/9846/382/10810/8613/10094/85477/1  
/3716/2353/4089/6778/3717/3458/916/3594/3326/3662/30009/3725/3111/3718/3320/3125/3127/9  
/1019/10451/1493/5777/5290/5533/5603/5534/2534/5588/5062/4775/10000/940/5293/2932/959/9  
/35/718/7124/3725/2770/5290/3593/4087/5603/5054/7040/7046/2771/6416/10000/356/5293  
/27040/6885/472/7099/7188/4616/5971/4615/8737/8837/51135/6357/7124/283106/1457/6850/6  
/3/4615/8737/8503/3665/6696/51135/7124/3725/29110/7100/3454/5290/3593/3455  
/3593/5743/3708/5533/5603/5534/4775/3709/10000/5781/5293/22808  
/1/5290/836/3593/5868/7414/3914/3908  
100133941/4254/3673  
/9/1236/10563/6364  
/5743/6502/3914/3908

'10125/3725/283106/1457/27436/5777/5290/5533/5603/5534/5588/4775/10000/5781/940/5293  
'7099/3458/10312/7124/3725/3111/6387/284/3125/3127/1493/528/51382/6374/7010  
j3/4318/6279/51433/23765/4312/10758/2932  
'4853/3458/916/3516/3594

./3823/4801/3309/3458/3326/4802/6892/7124/3111/1385/3320/3125/3127/2923

5/2770  
514/10799/55131/51068/166378/4931/83732/55781/10556/3692/23195/1460

'6885/5594/3716/65108/2353/7099/3717/3458/4615/51135/718/7124/3725/3111/3125/3127/5777

'3127/7100

1021/2335/7099/7184/1285/3696/3717/5747/3694/2791/4602/1027/3326/6194/8503/5586/6696/7/  
i33/1965/9140/5290/5861/9474/84938/5562/55255/3708/5289/5588/9706/10000/5293/8897/2280/

.26370/810/5153/815/26658/7932  
?7092/7139/1349/1340/488/1347/482/1351/1350/1329/27089  
'5747/7430/3694/8503/10627/23191/1398/10163/10095/4893/2247/3685/5156/5305/6387/3690/1/  
34/1499/3710/1655/4893/7124/2247/3685/2535/3690/10855/1975/10451/4659/5500/5777/7078/9  
/527/4726/496/1349/495/1340/525/64077/1347/4696/4709/1351/4694/4697/4701/1353/1350/132  
3503/1398/135/1499/2776/4893/5899/2247/1268/2770/5156/8631/54518/3690/284/10451/57568/!  
'5331/3762/2788/51079/4726/6300/5595/107/114/2166/4696/5600/747/115/2915/4709/2784/469/  
4/8797/51246  
'5566/125965/4695/7381/51548/4702/4707/4723/4718/51241/6602/51079/4726/55811/6300/1349  
696/7058/572/3912/3725/1293/3915/1286/3685/3918/5156/824/3690/10451/4659/5500/9475/549  
.53/488/5153/114/2902/2925/53373/3274/1956/26291/91807/56848/2251/815/115/8912/2915/89/  
6091/11065/9039/8554/6502/8454/55120/6477/867/11059/25898/9021/4734/51433/83737/55294/

36/5032/134860/3362/3640/5645/5697/9038/2912/7253/3355/6755/5731/51052/3360/1442/2905/

?9/5686/5719/5682/3710/572/64764/203068/10488/7124/283106/3915/1457/9586/5684/1385/570.  
'44/5156/3690/7078/3236/5290/836/7168/5743/4318/5243/1788/2033/6768/5154/6935/9252/705/  
j0/10018

.0105/5718/7436/5688/10528/9706/5710/5701/115209/3709/10000/5293/7494/293/1600/9861/23.

3049/23435/9939/29101/80336/10767/55110/2935

3/3091/7424/8323/4254/7048/3673/5594/3716/5567/1021/2335/2353/3065/4089/7184/7188/1285/  
6426/6672/3551/1967/7187/7098/6891/6885/9451/3716/7752/29992/6427/84671/7748/51427/643/  
527/8638/6773/5610/64764/10488/10134/4893/10312/7124/3912/1739/1293/3915/1286/9586/36  
3480/5682/3710/572/493869/6432/203068/11345/23064/7124/55706/4218/5684/5704/29110/9631  
7099/9367/7184/10552/7846/6281/10392/1781/10006/4615/8737/3326/10627/10121/23191/388/1  
1218/1175/6642/11311/5156/5584/23527/23362/10564/10097/8027/10093/5868/27243/25978/802  
32/3563/10563/7048/4050/6364/608/9235  
'8737/8503/1398/1499/2776/6892/3710/64764/10488/4893/7124/9586/3685/2770/1019/11214/13  
/6125/2353/6202/7099/6201/6124/6142/6868/4615/6194/8503/6173/629/729/6146/6136/717/614  
1/9519/4801/2353/4089/5925/5971/916/7419/11200/8503/64764/10488/4893/7124/3725/1739/200  
98/10163/3710/7334/7321/2309/718/11345/6500/10095/4671/7124/3725/10325/7336/824/29110/  
3/7187/953/965/6891/6885/3716/1021/3065/7188/5925/4616/5971/916/3516/1027/4615/8737/881  
'76/6892/3710/572/51135/6500/4893/7124/3725  
./10163/4642/51135/203068/10095/4671/4644/7124/3725/4430/7100/5777/8795/10427/9475/836/  
5594/5567/6364/3717/5747/2791/8503/1398/2776/572/6773/2309/6357/4893/56477/58191/2770/  
99/3717/3458/4615/4802/572/51135/718/10312/7124/3111/1385/6850/8877/3125/3127/1054  
0/11345/4893/3725/2247/1019/1385/29110/6850/8678/3454/131450/5290/836/3455/3572/5743/3  
71/8454/80267/9601/201595/267/1603/8720/9532/5887/51128/3301/10277/7494/22926/9709/478  
5/9586/1385/3718/29110/890/3454/1960/5290/317/836  
'046/4775/3709/10000/894/5293/3805/10758/22808  
311/4208/4318/5327/466/9915/4149/4291/51274/5154/6935/894/648/4286/4005/5468/5079  
7510/8672/1965/26019/55746/8665/7175/55308/10482/51808/11218/11269/51095/54960/55520/1

'55669/7419/4615/8737/3326/5586/3665/51393/3710/6773/51135/11345/4671/11035/7124/3725/  
3716/8766/1021/7099/3717/3458/4615/8503/3665/8480/91543/6773/51135/5610/7124/3841/3111  
3/4893/1654/3725/1739/5966/9586/1019/1385/3718/890/6850/5700/5934/5922/1960/5290/836/2/  
4/2033/51433/894/23595/2932/5001

9110/391/10451/9475/5290/10097/10093/63916/60/5603/382  
91/11325/3312/144983/58517/26121/6632/6431/151903/988/11017/5356/10915/51340/51691/51:  
/7058/718/203068/10312/9554/3685/3111/3690/3125/3127/528/821/51382/79659/1783/5868/511  
290/317/836/1364/3455/10686  
019/3718/29110/103/3454/1965/5290/317/836/3593/3455/4179  
154/10000/5293/6383/6385/2941/801/4780/90/25828  
-/8795  
3/6167

1/3455/814/9846/5533/5603/5534/7040/2534/7046/9021/3726/10000/5293  
/5154/10000/5781/894/5293/9655/5159/3566

5743/468/5603/4318/6416/9021/840/3726/10000/9252/83737/5293

318/11069

10000/5293  
466/3572/4087/3570/5533/5603/5534/7040/5588/7046/4775  
20

387

058/1977/572/5527/2309/64764/10488/4893/3912/2247/1293/3915/1286/9586/3685/3918/1019/1  
3/64798/6198/3476/440275/140775/1612/55102/83452

0451/4659/5500/9475/5499/8516/5290/10097/1902/10093/7414/1730/2252/4628/60  
9475/3236/5499/5290/836/3593/4087/3708/60/5603/4318/7040/867/8321/3709/3082/10000/5781/  
9/27089  
5584/889/5290/1902/7010/2252/60/5603/25780/11069/56034/23683/2771/3082/5154/10000/7057  
4/4697/4701/5582

/107/1340/6199/8110/155/1347/353500/91942/3991/114/57104/4696/10818/5600/26291/90993/4  
9/8516/5290/7450/7414/60/3914/3908/3611/896/2534/56034/5062/3082/5154/10000/7057/5574/  
13/3363/5582/3361/22953/147  
/8452/10277/8450/55284/64750/7332/7319/1161/10477/57448/4193/10401/9040/10054/7322/892

553/1145/5646/3351/9568/1325/6915/165829/56413/1146/6753/57053/155/153/4987/2901/11757

4/5700/1965/5290/317/836/10963/5706/3312/5714/3708/5533/5683/468/5621/5603/7385/10105/  
7/894/1945/5293/648/27086/5159/10253/6624

369/55102/5717/9698/60673/5692/7416/5707/6310/6667/25814/5649/9821

/6778/5925/4616/8202/3717/7474/4853/5747/3458/2791/8453/1027/3594/2950/3326/3597/8503/  
30/7188/3717/146198/7770/7594/3458/7673/4615/94039/8503/8892/27102/3665/10793/6892/763  
85/3918/5663/1019/1385/2535/29110/890/3690/5700/1741/3454/5934/5584/8516/528/51382/529  
/5700/8678/4217/10718/51164/1965/55746/317/836/7175/5861/5868/5706/3181/25978/7802/104  
1499/51135/203068/6500/10095/4671/11035/7124/5286/3725/3320/391/7100/10640/8795/51164/  
'23/3312/4087/382/57403/55737/5867/30844/9267/867/7046/11059/51510/10094

85/5156/29110/6387/3690/2923/9475/5290/836/6376/5743/3708/3570/5533/468/5603  
3/6773/6135/51135/718/5610/2162/7124/3725/6189/11224/6228/6132/29110/6850/103/2244/200  
05/9586/996/64682/3111/1019/4085/1385/2113/3718/890/3125/3127  
'7100/8678/9475/9140/5290/9474/11335/10097/10093/7414/63916/3708/5289/60/5603/3611/382  
19/8503/3665/1643/5719/6892/6773/25942/51135/5610/51426/7124/3725/3111/1019/5704/3718/:

/1364/5861/10097/10686/1902/10093/10061/7082/2597/4628/60/5603/382/10810/9871/2534/926  
'7454/3718/6387/10451/6368/10663/9475

708/5533/5289/5603  
0

10775/7514/2733/10799/65109/8669/23435/51068/8661/3837/10605/57187/9939/10556/80336/12

2635  
./1019/29110/3125/3127/103/3454/8795/1965/7177/5290/317/836/3593/64499/3455  
360/983

362/9879/3178/51729/57187/9939/6428/55110  
.43/9341/5289/60



.385/5156/3718/6850/3320/3690/284/1975/3454/5934/9180/8516/5290/8115/7450/3455/1902/556

/356/7057/5293/6383

'/1945/5293/196883/22808/5159

!878/115/4709/84987/1351/4694/4697/4701/1353/1350/1329/57521/27089  
2/894/5293

!5/7337/55585/65264/26272/991/9354

79/3972/7434/2740/151/2902/4985/2925/2692/1813/1394/64106/5020/3274/2696/7442/8862/139:

5534/5718/2534/4711/5688/5710/5701/1958



1495/4436/1643/1398/1499/2776/572/6773/51426/23401/6500/4893/10125/652/5899/3912/3725/  
9/7559/572/55422/91661/6773/57209/51135/718/5610/6432/63934/55769/171392/7124/54925/80/  
0/836/26508/7450/3455  
482/5714/55255/144983/127602/5533/5289/60/5683/468/5603/7385/9896/5534/5718/4711/5688/  
9475/5290/79659/836/10097/1783/10093/5868/63916/51143/2597/5289/60/5603/382/10810/6041

0916/3454/185/6138/6159/6217/5290/3593/7450/3455

29110/890/6850/3125/3127/5700/3454/2923

7/5062/10094

9401/5903/55110/8666/8890/6612/10419/25929/1915/8891

52/7010/2252/3570/468/3914/3908

2/2831/2147/3352/1141/2915/2690/1144/3363/2914/3361/7067/22953/1137/147



'2247/3915/1286/3685/3918/2770/1019/650/5156/2113/2535/3718/890/3320/6387/3454/185/2743  
0110/65251/30832/10224/84874/10520/10795/7581/6940/3111/7699/162963/7766/29110/6850/36

847/9706/2733/5710/5701

12/64746/9267/6416/10094/3840/840/51429/58484/5287/10000







36/9475/4292/5290/317/836/3593/7175/1163/26508/3455/1902/3572/4087/5743/2252/1487/3570,  
90/7767/57541/3125/3127/7539/91975/3454/5500/7562/2923/127396/79788/90592/7582/7571/7





/4257/6502/3914/3908/25780/896/10928/8454/4318/2271/7040/2956/1909/867/8321/7046/2771/  
695/8683/1965/51385/7596/389114/5499/90075/84924/7694/5290/317/836/3593/284406/284323,





2033/10681/9915/840/4149/3082/5154/10000/9252/356/894/5293/4312/196883/4286/2932/5159/  
/3455/80818/58500/163081/140612/10482/126068/148266/390980/641339/6431/7637/339559/90:







3566/5468/2778/2941/6934/10319/801/4780/6198/26060/10018/999/9134/862/3595  
333/148103/7556/7743/7691/9021/57232/93134/57547/10000/5781/57711/356/115509/7771/284:





307/5293/7644/126295/7773/121274/9310/684/7574/158431/10172/23118/7568/7733/7587/16322





27/440275/6428/340252/26152/342926/84914/8890/56242/284390/147948/9641/55786/10013182







7/345462/90594/3678/169270/8891/93474/136051/7592/7567/163087/80095/199704/199692/114





7/147929/7730/65243/5970/162993/79891/10780/4940/59348/57343/219749/90321/81931/1616/:







22869/147657/727/64170/7561/3592
