# Supplementary material for: The Potential Diagnostic Value of Immune-Related Genes in Interstitial Fibrosis and Tubular Atrophy after Kidney Transplantation
Source: Hindawi journal article supplement (doi:10.1155/2022/7212852), 2022-06-17
Supplement: f1 [file 7212852.f1.zip]

| ID       | Description                                  | setSize | enrichment | NES      | pvalue   | p.adjust | qvalues  | rank |
|----------|----------------------------------------------|---------|------------|----------|----------|----------|----------|------|
| hsa01240 | Biosynthesis of amino acids                  | 142     | 0.584365   | 2.724171 | 0.001592 | 0.007936 | 0.003738 | 2374 |
| hsa01200 | Carbon metabolism                            | 110     | 0.580654   | 2.607929 | 0.0016   | 0.007936 | 0.003738 | 3283 |
| hsa00190 | Oxidative phosphorylation                    | 98      | 0.578637   | 2.564096 | 0.00161  | 0.007936 | 0.003738 | 5477 |
| hsa04146 | Peroxisome                                   | 77      | 0.654296   | 2.789063 | 0.001629 | 0.007936 | 0.003738 | 3762 |
| hsa04976 | Bile secretion                               | 71      | 0.588415   | 2.468983 | 0.001667 | 0.007936 | 0.003738 | 1922 |
| hsa03320 | PPAR signaling                               | 68      | 0.490048   | 2.038171 | 0.001695 | 0.007936 | 0.003738 | 2406 |
| hsa00983 | Drug metabolism - cytochrome P450            | 69      | 0.569506   | 2.371484 | 0.001701 | 0.007936 | 0.003738 | 1662 |
| hsa05204 | Chemical carcinogenesis                      | 69      | 0.569418   | 2.37112  | 0.001701 | 0.007936 | 0.003738 | 1484 |
| hsa01230 | Biosynthesis of nucleosides and nucleotides  | 65      | 0.484698   | 1.986952 | 0.001712 | 0.007936 | 0.003738 | 2108 |
| hsa01212 | Fatty acid metabolism                        | 55      | 0.524659   | 2.066382 | 0.001724 | 0.007936 | 0.003738 | 3254 |
| hsa00010 | Glycolysis / Gluconeogenesis                 | 57      | 0.474755   | 1.888683 | 0.00173  | 0.007936 | 0.003738 | 809  |
| hsa00982 | Drug metabolism - cytochrome P450            | 57      | 0.671856   | 2.672795 | 0.00173  | 0.007936 | 0.003738 | 1484 |
| hsa00480 | Glutathione metabolism                       | 53      | 0.539265   | 2.110269 | 0.001736 | 0.007936 | 0.003738 | 1864 |
| hsa00071 | Fatty acid catabolism                        | 42      | 0.625735   | 2.334117 | 0.001751 | 0.007936 | 0.003738 | 2283 |
| hsa00140 | Steroid hormone biosynthesis                 | 50      | 0.573833   | 2.223669 | 0.001751 | 0.007936 | 0.003738 | 2874 |
| hsa00830 | Retinol metabolism                           | 50      | 0.654682   | 2.536968 | 0.001751 | 0.007936 | 0.003738 | 1457 |
| hsa04978 | Mineral absorption                           | 50      | 0.570825   | 2.21201  | 0.001751 | 0.007936 | 0.003738 | 3065 |
| hsa00270 | Cysteine and methionine metabolism           | 46      | 0.551743   | 2.087537 | 0.001776 | 0.007936 | 0.003738 | 1898 |
| hsa00280 | Valine, leucine, and isoleucine metabolism   | 46      | 0.768067   | 2.906006 | 0.001776 | 0.007936 | 0.003738 | 2677 |
| hsa00980 | Metabolism of drugs and xenobiotics          | 60      | 0.608855   | 2.429341 | 0.001776 | 0.007936 | 0.003738 | 1484 |
| hsa00310 | Lysine degradation                           | 59      | 0.47209    | 1.871878 | 0.001786 | 0.007936 | 0.003738 | 1178 |
| hsa00330 | Arginine and proline metabolism              | 48      | 0.64363    | 2.457741 | 0.001786 | 0.007936 | 0.003738 | 1833 |
| hsa00380 | Tryptophan metabolism                        | 40      | 0.720794   | 2.656316 | 0.001789 | 0.007936 | 0.003738 | 1180 |
| hsa00020 | Citrate cycle (TCA cycle)                    | 29      | 0.686685   | 2.358988 | 0.001792 | 0.007936 | 0.003738 | 3283 |
| hsa00630 | Glyoxylate and shikimate metabolism          | 29      | 0.75506    | 2.593878 | 0.001792 | 0.007936 | 0.003738 | 2677 |
| hsa00350 | Tyrosine metabolism                          | 33      | 0.620835   | 2.202011 | 0.001795 | 0.007936 | 0.003738 | 1578 |
| hsa00360 | Phenylalanine metabolism                     | 17      | 0.697864   | 2.110117 | 0.001799 | 0.007936 | 0.003738 | 1409 |
| hsa00760 | Nicotinate and nicotinamide metabolism       | 31      | 0.584295   | 2.043163 | 0.001808 | 0.007936 | 0.003738 | 2124 |
| hsa00450 | Selenocysteine metabolism                    | 16      | 0.702609   | 2.082988 | 0.001812 | 0.007936 | 0.003738 | 1820 |
| hsa00620 | Pyruvate metabolism                          | 36      | 0.621057   | 2.226502 | 0.001812 | 0.007936 | 0.003738 | 2834 |
| hsa00220 | Arginine biosynthesis                        | 20      | 0.688797   | 2.181083 | 0.001815 | 0.007936 | 0.003738 | 2016 |
| hsa00770 | Pantothenate and CoA biosynthesis            | 20      | 0.68002    | 2.15329  | 0.001815 | 0.007936 | 0.003738 | 2655 |
| hsa04964 | Proximal tubule acid secretion               | 20      | 0.717089   | 2.27067  | 0.001815 | 0.007936 | 0.003738 | 2708 |
| hsa00640 | Propanoate metabolism                        | 30      | 0.754818   | 2.612103 | 0.001828 | 0.007936 | 0.003738 | 2677 |
| hsa00650 | Butanoate metabolism                         | 24      | 0.779394   | 2.579341 | 0.001828 | 0.007936 | 0.003738 | 3031 |
| hsa00053 | Ascorbate and aldehyde metabolism            | 23      | 0.908035   | 2.984193 | 0.001832 | 0.007936 | 0.003738 | 1093 |
| hsa00250 | Alanine, aspartate, and glutamate metabolism | 34      | 0.608282   | 2.151383 | 0.001832 | 0.007936 | 0.003738 | 2571 |
| hsa00790 | Folate biosynthesis                          | 23      | 0.676148   | 2.222112 | 0.001832 | 0.007936 | 0.003738 | 2243 |
| hsa00860 | Porphyry and chlorophyll metabolism          | 34      | 0.641011   | 2.267142 | 0.001832 | 0.007936 | 0.003738 | 2388 |
| hsa00410 | beta-Alanine metabolism                      | 28      | 0.719032   | 2.453176 | 0.001835 | 0.007936 | 0.003738 | 2571 |
| hsa00260 | Glycine, serine, and alanine metabolism      | 35      | 0.811553   | 2.883377 | 0.001842 | 0.007936 | 0.003738 | 1112 |
| hsa00040 | Pentose phosphate pathway                    | 26      | 0.797585   | 2.680225 | 0.001848 | 0.007936 | 0.003738 | 1093 |
| hsa04966 | Collecting duct acid secretion               | 27      | 0.681333   | 2.301014 | 0.001855 | 0.007936 | 0.003738 | 3164 |
| hsa00340 | Histidine metabolism                         | 21      | 0.811067   | 2.579902 | 0.00188  | 0.007936 | 0.003738 | 1263 |
| hsa05310 | Asthma                                       | 23      | -0.6705    | -2.22809 | 0.002193 | 0.007936 | 0.003738 | 3838 |
| hsa05340 | Primary immunodeficiency                     | 34      | -0.58737   | -2.19691 | 0.002193 | 0.007936 | 0.003738 | 5328 |
| hsa05330 | Allograft rejection                          | 33      | -0.68786   | -2.5158  | 0.002247 | 0.007936 | 0.003738 | 3838 |
| hsa05322 | Systemic lupus erythematosus                 | 48      | -0.6246    | -2.53276 | 0.002262 | 0.007936 | 0.003738 | 2950 |
| hsa04940 | Type I diabetes mellitus                     | 41      | -0.61134   | -2.37292 | 0.002288 | 0.007936 | 0.003738 | 3838 |
| hsa05332 | Graft-versus-host disease                    | 41      | -0.62243   | -2.41597 | 0.002288 | 0.007936 | 0.003738 | 3838 |
| hsa05144 | Malaria                                      | 47      | -0.52371   | -2.11274 | 0.002304 | 0.007936 | 0.003738 | 3963 |
| hsa04672 | Intestinal immune response                   | 42      | -0.60074   | -2.34377 | 0.00232  | 0.007936 | 0.003738 | 4025 |
| hsa05320 | Autoimmune disease                           | 44      | -0.63035   | -2.48714 | 0.002326 | 0.007936 | 0.003738 | 3838 |
| hsa05416 | Viral myocarditis                            | 58      | -0.63902   | -2.7046  | 0.002331 | 0.007936 | 0.003738 | 2354 |
| hsa05134 | Legionellosis                                | 57      | -0.39402   | -1.65622 | 0.002358 | 0.007936 | 0.003738 | 3839 |
| hsa05321 | Inflammatory bowel disease                   | 55      | -0.57528   | -2.405   | 0.00237  | 0.007936 | 0.003738 | 4075 |
| hsa05100 | Bacterial infection                          | 67      | -0.42141   | -1.85743 | 0.002392 | 0.007936 | 0.003738 | 3176 |

|          |               |     |          |          |          |          |          |      |
|----------|---------------|-----|----------|----------|----------|----------|----------|------|
| hsa05412 | Arrhythmia    | 68  | -0.39022 | -1.71985 | 0.002427 | 0.007936 | 0.003738 | 3008 |
| hsa04061 | Viral prote   | 87  | -0.46819 | -2.13726 | 0.002481 | 0.007936 | 0.003738 | 4752 |
| hsa05140 | Leishmania    | 74  | -0.61735 | -2.7415  | 0.002481 | 0.007936 | 0.003738 | 3963 |
| hsa05235 | PD-L1 exp     | 87  | -0.49387 | -2.25447 | 0.002481 | 0.007936 | 0.003738 | 4032 |
| hsa05414 | Dilated car   | 87  | -0.39434 | -1.80013 | 0.002481 | 0.007936 | 0.003738 | 4213 |
| hsa05133 | Pertussis     | 71  | -0.48928 | -2.17494 | 0.002488 | 0.007936 | 0.003738 | 3925 |
| hsa04657 | IL-17 signa   | 86  | -0.37336 | -1.69944 | 0.0025   | 0.007936 | 0.003738 | 4816 |
| hsa04658 | Th1 and Th    | 86  | -0.53192 | -2.42116 | 0.0025   | 0.007936 | 0.003738 | 4451 |
| hsa04540 | Gap junctio   | 81  | -0.40543 | -1.83182 | 0.002506 | 0.007936 | 0.003738 | 4623 |
| hsa05150 | Staphylocc    | 73  | -0.54177 | -2.40565 | 0.002506 | 0.007936 | 0.003738 | 2026 |
| hsa04512 | ECM-recept    | 82  | -0.46417 | -2.0975  | 0.002525 | 0.007936 | 0.003738 | 3375 |
| hsa04640 | Hematopo      | 91  | -0.52798 | -2.41627 | 0.002525 | 0.007936 | 0.003738 | 3838 |
| hsa05410 | Hypertropl    | 82  | -0.37205 | -1.68125 | 0.002525 | 0.007936 | 0.003738 | 2746 |
| hsa05222 | Small cell l  | 90  | -0.35967 | -1.64056 | 0.002545 | 0.007936 | 0.003738 | 4542 |
| hsa05323 | Rheumatoi     | 90  | -0.38438 | -1.75328 | 0.002545 | 0.007936 | 0.003738 | 4144 |
| hsa04612 | Antigen pr    | 77  | -0.4469  | -1.9841  | 0.002577 | 0.007936 | 0.003738 | 4342 |
| hsa04666 | Fc gamma      | 95  | -0.4178  | -1.92482 | 0.002577 | 0.007936 | 0.003738 | 2977 |
| hsa04659 | Th17 cell d   | 96  | -0.54041 | -2.48811 | 0.002604 | 0.007936 | 0.003738 | 4432 |
| hsa04660 | T cell recept | 96  | -0.3821  | -1.75924 | 0.002604 | 0.007936 | 0.003738 | 4813 |
| hsa04662 | B cell recept | 79  | -0.43094 | -1.92398 | 0.002604 | 0.007936 | 0.003738 | 3434 |
| hsa04064 | NF-kappa      | 98  | -0.44543 | -2.06006 | 0.002625 | 0.007936 | 0.003738 | 5316 |
| hsa04620 | Toll-like re  | 98  | -0.43652 | -2.01887 | 0.002625 | 0.007936 | 0.003738 | 3856 |
| hsa04625 | C-type lect   | 98  | -0.36894 | -1.70632 | 0.002625 | 0.007936 | 0.003738 | 4414 |
| hsa05146 | Amoebiasis    | 98  | -0.47148 | -2.18056 | 0.002625 | 0.007936 | 0.003738 | 4624 |
| hsa04611 | Platelet act  | 114 | -0.3706  | -1.76289 | 0.002639 | 0.007936 | 0.003738 | 2517 |
| hsa04218 | Cellular sei  | 148 | -0.33633 | -1.66431 | 0.002646 | 0.007936 | 0.003738 | 4963 |
| hsa04933 | AGE-RAGE      | 99  | -0.36513 | -1.68688 | 0.002646 | 0.007936 | 0.003738 | 4542 |
| hsa04145 | Phagosome     | 144 | -0.40811 | -2.01049 | 0.002653 | 0.007936 | 0.003738 | 2354 |
| hsa04668 | TNF signal    | 108 | -0.4975  | -2.3331  | 0.002653 | 0.007936 | 0.003738 | 4849 |
| hsa05142 | Chagas dis    | 97  | -0.41058 | -1.88876 | 0.002653 | 0.007936 | 0.003738 | 4695 |
| hsa05145 | Toxoplasma    | 108 | -0.46201 | -2.16665 | 0.002653 | 0.007936 | 0.003738 | 3963 |
| hsa04670 | Leukocyte     | 105 | -0.46352 | -2.15928 | 0.002681 | 0.007936 | 0.003738 | 1539 |
| hsa04380 | Osteoclast    | 122 | -0.50287 | -2.40669 | 0.002695 | 0.007936 | 0.003738 | 4910 |
| hsa05135 | Yersinia inf  | 130 | -0.39641 | -1.91282 | 0.00271  | 0.007936 | 0.003738 | 4060 |
| hsa04210 | Apoptosis     | 129 | -0.33843 | -1.62859 | 0.002725 | 0.007936 | 0.003738 | 4536 |
| hsa04630 | JAK-STAT      | 139 | -0.34513 | -1.68307 | 0.002725 | 0.007936 | 0.003738 | 2087 |
| hsa05161 | Hepatitis B   | 157 | -0.42056 | -2.11014 | 0.002732 | 0.007936 | 0.003738 | 4784 |
| hsa05162 | Measles       | 132 | -0.41314 | -2.00115 | 0.002732 | 0.007936 | 0.003738 | 3878 |
| hsa04621 | NOD-like r    | 161 | -0.43057 | -2.16535 | 0.00274  | 0.007936 | 0.003738 | 3974 |
| hsa05202 | Transcripti   | 158 | -0.3822  | -1.9165  | 0.00274  | 0.007936 | 0.003738 | 3425 |
| hsa05203 | Viral carcin  | 161 | -0.39431 | -1.983   | 0.00274  | 0.007936 | 0.003738 | 2514 |
| hsa04921 | Oxytocin s    | 138 | -0.36217 | -1.7669  | 0.002747 | 0.007936 | 0.003738 | 4322 |
| hsa05164 | Influenza A   | 162 | -0.43666 | -2.19926 | 0.002747 | 0.007936 | 0.003738 | 3925 |
| hsa04015 | Rap1 signa    | 194 | -0.31669 | -1.64168 | 0.00277  | 0.007936 | 0.003738 | 3366 |
| hsa04514 | Cell adhesi   | 136 | -0.435   | -2.10788 | 0.00277  | 0.007936 | 0.003738 | 3136 |
| hsa05169 | Epstein-Ba    | 194 | -0.4495  | -2.33013 | 0.00277  | 0.007936 | 0.003738 | 4943 |
| hsa04650 | Natural kill  | 119 | -0.4493  | -2.13215 | 0.002778 | 0.007936 | 0.003738 | 2670 |
| hsa04926 | Relaxin sig   | 119 | -0.38373 | -1.821   | 0.002778 | 0.007936 | 0.003738 | 4726 |
| hsa05205 | Proteoglyc    | 199 | -0.33604 | -1.74909 | 0.002778 | 0.007936 | 0.003738 | 2547 |
| hsa05171 | Coronaviru    | 195 | -0.45905 | -2.38053 | 0.002786 | 0.007936 | 0.003738 | 3925 |
| hsa04062 | Chemokine     | 177 | -0.41101 | -2.09437 | 0.002793 | 0.007936 | 0.003738 | 4783 |
| hsa05152 | Tuberculos    | 171 | -0.35902 | -1.81859 | 0.002793 | 0.007936 | 0.003738 | 4279 |
| hsa04510 | Focal adhe    | 196 | -0.39404 | -2.04579 | 0.002801 | 0.007936 | 0.003738 | 2425 |
| hsa05206 | MicroRNA      | 163 | -0.3671  | -1.84769 | 0.002809 | 0.007936 | 0.003738 | 3388 |
| hsa05130 | Pathogenic    | 184 | -0.353   | -1.80715 | 0.002825 | 0.007936 | 0.003738 | 1525 |
| hsa05170 | Human im      | 191 | -0.31077 | -1.60512 | 0.002825 | 0.007936 | 0.003738 | 4060 |
| hsa05167 | Kaposi sarc   | 175 | -0.39105 | -1.989   | 0.002833 | 0.007936 | 0.003738 | 2406 |
| hsa05163 | Human cyt     | 210 | -0.35233 | -1.84734 | 0.002865 | 0.007936 | 0.003738 | 4279 |

|          |                  |     |          |          |          |          |          |      |
|----------|------------------|-----|----------|----------|----------|----------|----------|------|
| hsa05131 | Shigellosis      | 209 | -0.3367  | -1.76273 | 0.002874 | 0.007936 | 0.003738 | 2878 |
| hsa04810 | Regulation       | 204 | -0.32536 | -1.69161 | 0.002882 | 0.007936 | 0.003738 | 2764 |
| hsa05166 | Human T-<br>cell | 211 | -0.47734 | -2.49668 | 0.00289  | 0.007936 | 0.003738 | 4616 |
| hsa04010 | MAPK sign        | 274 | -0.29712 | -1.61812 | 0.002994 | 0.008114 | 0.003822 | 4442 |
| hsa04060 | Cytokine-c       | 249 | -0.37053 | -1.98859 | 0.003012 | 0.008114 | 0.003822 | 4783 |
| hsa05132 | Salmonella       | 244 | -0.37734 | -2.01699 | 0.00303  | 0.008114 | 0.003822 | 3562 |
| hsa04932 | Non-alcoh        | 137 | 0.330555 | 1.537087 | 0.003096 | 0.008206 | 0.003866 | 5477 |
| hsa04714 | Thermoge         | 189 | 0.323783 | 1.565041 | 0.003115 | 0.008206 | 0.003866 | 5477 |
| hsa05165 | Human pa         | 316 | -0.27096 | -1.4988  | 0.003165 | 0.008269 | 0.003895 | 2995 |
| hsa04151 | PI3K-Akt s       | 321 | -0.26964 | -1.49092 | 0.0033   | 0.008554 | 0.00403  | 3425 |
| hsa05168 | Herpes sim       | 427 | -0.37145 | -2.12781 | 0.003559 | 0.009151 | 0.004311 | 5252 |
| hsa00970 | Aminoacyl        | 24  | 0.605679 | 2.004446 | 0.003656 | 0.009251 | 0.004358 | 4247 |
| hsa05200 | Pathways i       | 492 | -0.27798 | -1.61875 | 0.003663 | 0.009251 | 0.004358 | 4462 |
| hsa04975 | Fat digesti      | 35  | 0.503899 | 1.790308 | 0.003683 | 0.009251 | 0.004358 | 2677 |
| hsa00532 | Glycosamir       | 20  | -0.61837 | -1.97726 | 0.004435 | 0.011052 | 0.005207 | 2743 |
| hsa04142 | Lysosome         | 125 | 0.335495 | 1.540994 | 0.004724 | 0.011685 | 0.005505 | 2271 |
| hsa04350 | TGF-beta s       | 87  | -0.34163 | -1.55951 | 0.004963 | 0.012181 | 0.005738 | 4907 |
| hsa04610 | Compleme         | 77  | -0.36076 | -1.60169 | 0.005155 | 0.012435 | 0.005858 | 1715 |
| hsa00561 | Glycerolipi      | 55  | 0.431293 | 1.698658 | 0.005172 | 0.012435 | 0.005858 | 2724 |
| hsa05220 | Chronic my       | 76  | -0.35873 | -1.58695 | 0.005181 | 0.012435 | 0.005858 | 5678 |
| hsa03040 | Spliceoson       | 128 | -0.32984 | -1.58868 | 0.005405 | 0.012878 | 0.006066 | 6753 |
| hsa04072 | Phospholip       | 138 | -0.31486 | -1.53609 | 0.005495 | 0.012924 | 0.006088 | 2517 |
| hsa00120 | Primary bil      | 14  | 0.658246 | 1.850456 | 0.005505 | 0.012924 | 0.006088 | 2596 |
| hsa00900 | Terpenoid        | 22  | 0.612283 | 1.967848 | 0.00565  | 0.013169 | 0.006204 | 2931 |
| hsa04360 | Axon guidi       | 173 | -0.29192 | -1.48112 | 0.005714 | 0.013224 | 0.00623  | 3441 |
| hsa04150 | mTOR sigr        | 146 | 0.311396 | 1.45339  | 0.00639  | 0.014683 | 0.006917 | 4312 |
| hsa05221 | Acute mye        | 65  | -0.36759 | -1.6038  | 0.007177 | 0.01633  | 0.007693 | 4695 |
| hsa01210 | 2-Oxocarb        | 18  | 0.607482 | 1.872002 | 0.007207 | 0.01633  | 0.007693 | 4470 |
| hsa04977 | Vitamin dig      | 20  | 0.620694 | 1.965434 | 0.00726  | 0.016334 | 0.007695 | 1839 |
| hsa04550 | Signaling p      | 130 | -0.31284 | -1.50955 | 0.00813  | 0.018167 | 0.008558 | 4907 |
| hsa00910 | Nitrogen n       | 16  | 0.606064 | 1.796765 | 0.009058 | 0.020101 | 0.009469 | 2344 |
| hsa00062 | Fatty acid c     | 25  | 0.563031 | 1.885661 | 0.009191 | 0.020121 | 0.009479 | 3254 |
| hsa01040 | Biosynthes       | 25  | 0.551446 | 1.846864 | 0.009191 | 0.020121 | 0.009479 | 3254 |
| hsa04721 | Synaptic ve      | 68  | 0.39662  | 1.649593 | 0.010169 | 0.022114 | 0.010417 | 4216 |
| hsa04950 | Maturity oi      | 19  | 0.591207 | 1.842105 | 0.010889 | 0.02336  | 0.011004 | 890  |
| hsa05418 | Fluid shear      | 132 | -0.29215 | -1.41512 | 0.010929 | 0.02336  | 0.011004 | 3446 |
| hsa04110 | Cell cycle       | 117 | -0.32702 | -1.556   | 0.010959 | 0.02336  | 0.011004 | 4154 |
| hsa04623 | Cytosolic L      | 56  | -0.3555  | -1.49408 | 0.01171  | 0.024797 | 0.011681 | 3894 |
| hsa00670 | One carbo        | 19  | 0.577749 | 1.800172 | 0.014519 | 0.03035  | 0.014297 | 3426 |
| hsa04614 | Renin-ang        | 20  | 0.562231 | 1.780312 | 0.014519 | 0.03035  | 0.014297 | 1864 |
| hsa04270 | Vascular sr      | 116 | -0.30039 | -1.43547 | 0.015957 | 0.033142 | 0.015613 | 3468 |
| hsa04664 | Fc epsilon       | 63  | -0.3615  | -1.56702 | 0.016588 | 0.034232 | 0.016126 | 2437 |
| hsa05160 | Hepatitis C      | 144 | -0.28023 | -1.38052 | 0.018568 | 0.038075 | 0.017937 | 3964 |
| hsa04217 | Necroptos        | 124 | -0.29083 | -1.39557 | 0.019231 | 0.038942 | 0.018345 | 4223 |
| hsa04979 | Cholester        | 44  | 0.412738 | 1.554538 | 0.019231 | 0.038942 | 0.018345 | 1839 |
| hsa04744 | Phototrans       | 20  | 0.534225 | 1.691631 | 0.019964 | 0.040175 | 0.018926 | 4682 |
| hsa00601 | Glycosphir       | 27  | 0.470208 | 1.587997 | 0.020408 | 0.040816 | 0.019228 | 3761 |
| hsa00730 | Thiamine r       | 14  | 0.581461 | 1.634598 | 0.022018 | 0.043767 | 0.020618 | 2736 |

leading\_edcore\_enrichment

tags=48%, 55163/23475/8836/8564/54490/2643/210/205/5313/145226/224/219/6470/217/249/10  
tags=57%, 8802/48/414328/1962/4329/5313/3417/229/8801/26007/2731/5096/6470/2203/26275/  
tags=71%, 127124/155066/1337/1349/245972/9167/245973/50617/529/525/64077/29796/4706/2  
tags=71%, 1962/5827/3155/1610/8309/51268/3417/11001/5264/51179/5830/51/26061/6647/30/1  
tags=45%, 123264/1576/1244/200931/54490/8671/6555/9376/79799/54575/54658/54657/10864/3  
tags=40%, 1962/5106/8309/2168/345/11001/34/1582/51/30/2710/5105/33/364/6256/336/2170/13  
tags=39%, 7172/1576/54490/2940/2938/1807/151531/79799/51733/54575/54658/54657/8824/54  
tags=39%, 1576/54490/130/2940/1551/2938/79799/54575/128/54658/54657/54578/54576/54600/  
tags=38%, 48/5053/162417/5313/3417/1491/229/445/6470/29968/95/384/435/84706/50/113675/!  
tags=49%, 36/1962/34/27349/51/1892/38/30/7923/84869/3033/33/54995/1376/51102/10449/799  
tags=30%, 5106/130589/130/2538/5313/229/224/223/219/217/2203/3945/10327/9562/128/501/5  
tags=49%, 4129/4128/2329/1576/1555/54490/130/2940/2938/2326/79799/54575/128/54658/5465  
tags=40%, 124975/2940/51471/3417/2938/79017/9027/2729/2936/4258/2878/2678/2948/119391/  
tags=55%, 36/1962/130/224/34/223/219/217/51/2639/1892/38/30/128/501/10455/3033/33/1376/  
tags=50%, 1576/54490/1551/79799/8644/54575/54658/54657/54578/54576/54600/54577/54659/!  
tags=50%, 1576/1555/54490/130/1551/145226/79799/54575/10901/317749/128/54658/54657/822  
tags=58%, 340024/6569/142680/7421/1317/475/481/2495/261729/113235/4494/55630/115019/1  
tags=46%, 55256/1491/64902/23743/635/7263/3945/29968/2729/4357/113675/191/56267/23382/  
tags=76%, 36/3712/1962/18/3155/4329/224/549/34/223/219/64902/5096/217/26275/1892/38/30/  
tags=47%, 1576/1555/54490/130/27294/22977/2940/2938/79799/54575/128/54658/54657/54578/  
tags=29%, 55526/1962/51268/224/223/123688/219/217/2639/1892/8424/38/501/3033/51166/101  
tags=46%, 4129/112483/4128/84735/1610/58510/79814/112817/224/8659/223/219/8974/217/26/  
tags=57%, 4129/4128/55526/1962/64577/8564/224/223/219/130013/217/26/2639/1892/38/1644/3  
tags=72%, 8802/48/5106/3417/8801/55753/5105/50/4967/5091/8803/4191/6392/1738/3418/47/6  
tags=76%, 48/112817/2731/5096/6470/51179/2653/132158/38/275/9380/54363/5095/50/6472/18  
tags=45%, 4129/4128/130/81889/2184/3081/3242/1644/128/316/4282/221/220074/2805/7306  
tags=53%, 4129/4128/5053/10249/3242/1644/4282/221/2805  
tags=52%, 23475/4907/5169/4860/23409/316/683/93100/349565/54981/64802/23410/554235/516  
tags=50%, 22928/1491/51540/51091/22929/56267/118672/10587  
tags=56%, 5106/5313/3029/224/223/219/217/134526/3945/38/197257/9380/501/5105/5091/5590  
tags=55%, 162417/445/2746/95/384/435/84706/2744/2805/2747/2875  
tags=60%, 5169/224/1807/219/217/51733/53354/80347/79717/5167/8876/60496  
tags=70%, 5106/8671/2746/1468/358/481/5105/760/2744/762/486/2747/10991/482  
tags=73%, 8802/1962/18/4329/79611/8801/5096/26275/3945/51/1892/38/5095/1629/594/84693/!  
tags=75%, 1962/18/56898/3155/54988/123876/348158/79944/1892/38/3033/7915/6296/622/6598  
tags=91%, 9365/54490/55586/224/223/219/217/10327/79799/54575/54658/54657/501/54578/545  
tags=56%, 2346/18/443/445/8659/64902/2746/8528/435/84706/56954/7915/189/2744/2805/2747  
tags=61%, 5053/8836/2643/249/8644/6697/1719/5860/4337/873/4338/5092/10243/84105  
tags=50%, 54490/210/79799/54575/54658/54657/54578/54576/54600/54577/54659/54579/12445  
tags=64%, 1962/84735/18/4329/224/1807/223/219/217/26275/51/1892/51733/501/221/8310/557  
tags=66%, 4129/4128/29958/1610/51268/1491/55349/2731/64902/6470/635/2653/132158/29968/  
tags=73%, 9365/6652/54490/27294/51084/9942/10327/51181/79799/54575/54658/54657/54578/!  
tags=78%, 127124/155066/6521/245972/245973/50617/760/529/525/535/10723/528/496/526/527  
tags=71%, 4129/144193/4128/84735/443/224/223/219/217/26/10841/3176/138199/501/221  
tags=74%, 3125/3127/6356/3117/3122/3118/3112/3123/3126/958/3119/2206/3113/3115/2207/31  
tags=71%, 8625/29851/959/695/29760/930/5993/6891/916/920/3543/925/915/5788/4261/3718/8  
tags=70%, 3125/3127/5551/3117/940/3122/3118/3112/3106/3135/3123/3126/958/3119/942/3107  
tags=56%, 3117/2903/940/6628/3122/1511/3118/3112/6737/3123/729/3126/958/3119/942/2212/3  
tags=63%, 3125/3127/3552/3553/5551/3117/940/1363/3122/5799/3118/3112/3106/3135/3123/31  
tags=61%, 3125/3127/3552/3553/5551/3117/940/3821/3122/3118/3112/3106/3135/3123/3126/31  
tags=57%, 7040/7099/4615/3553/6401/948/22914/3820/3576/4035/7059/958/3082/7097/1311/70  
tags=60%, 3600/7040/3125/3127/9020/3117/940/3122/3118/608/3112/3123/3126/958/3119/7852  
tags=52%, 3125/3127/5551/3117/940/3122/3118/3112/3106/3135/3123/3126/958/3119/942/3107  
tags=60%, 3122/6442/6444/3118/27/1525/3112/637/3106/3135/3123/3126/958/1756/3119/942/7  
tags=42%, 7099/4615/5970/1195/4790/3553/840/4671/3576/1937/7097/3310/3689/929/834/836/3  
tags=69%, 3594/4772/7040/7099/3125/3127/8807/3459/50615/3552/8809/5970/6778/4790/3553/  
tags=31%, 859/10096/8218/63916/867/399694/26052/3611/71/10095/10163/60/858/391/3059/98

tags=37%, 786/3679/782/55799/3696/83439/6442/8515/6444/3685/6547/3675/489/1756/3694/69  
tags=53%, 3606/6354/53833/3627/2921/57007/6351/1235/8807/6356/8809/729230/5197/6374/63  
tags=64%, 7040/7099/3125/3127/4615/3459/51135/3552/5970/4790/3553/3717/3117/5603/3122/  
tags=49%, 4772/10538/7099/3265/4615/3459/5970/4790/3717/916/920/915/940/5603/4794/5550  
tags=44%, 1674/112/111/779/7040/6445/7273/786/3679/782/55799/108/3696/6442/8515/6444/31  
tags=51%, 114548/7099/4615/51135/3552/5970/4790/6374/3553/840/2771/1072/5603/3576/5594  
tags=47%, 7184/6885/6354/3627/2921/29761/53342/4322/5743/5598/2354/6356/5970/4790/6374  
tags=63%, 182/3516/5530/3594/6777/4772/3125/3127/3459/5970/6778/4790/3717/916/920/3117  
tags=47%, 2770/10381/347688/112/5598/2776/111/23236/3265/80310/7277/3357/3356/2771/559  
tags=41%, 3118/3112/3123/3880/3126/9103/3119/1675/2357/3689/2212/6404/2359/3113/2209/3  
tags=43%, 9900/3913/3914/3910/948/5649/3679/3696/8515/3685/1278/7059/3675/3694/3676/13  
tags=56%, 3125/3127/931/910/3552/1441/951/4254/3574/3553/2323/916/920/966/3117/925/915,  
tags=33%, 3679/782/55799/3696/53632/6442/8515/6444/3685/6547/7168/7171/3675/489/1756/3  
tags=41%, 1019/207/3911/5743/1288/1870/10319/578/5970/4790/3913/3914/3910/7157/6502/36  
tags=51%, 8600/3600/7040/7099/3125/3127/3552/6374/3553/6364/4314/3117/940/3576/3122/63  
tags=47%, 3306/1385/5993/3125/3127/6891/920/3117/925/10437/5720/3821/3822/4261/3122/31  
tags=37%, 7454/10096/273/5788/1072/100137049/3985/3635/5335/5594/5321/8605/7408/10000/  
tags=61%, 7048/53342/5530/3594/6777/4772/7040/3125/3127/3459/50615/3662/5970/6778/4790  
tags=45%, 5062/6885/208/1019/207/5530/4772/3265/9020/5970/4790/916/920/925/915/940/578  
tags=47%, 695/29760/208/930/207/5530/4772/3265/11006/5970/4790/971/10990/10288/4794/36  
tags=57%, 4791/4050/4616/959/695/29760/7412/6885/2921/142/5743/8600/6351/7099/4615/902  
tags=37%, 6351/7099/4615/7096/51135/5970/4790/3553/6373/5603/3576/6352/51311/51284/559  
tags=43%, 207/53342/5530/5743/4772/64170/114548/3265/9020/5970/4790/1540/3553/64581/56  
tags=50%, 913/5869/2921/3911/1288/2769/2776/1277/7040/10319/23236/7099/910/5970/4790/3  
tags=32%, 108/100137049/4638/5603/5500/1278/5594/2778/84876/5321/8605/1281/7408/10672/  
tags=43%, 7249/2308/4193/9133/208/1019/204851/7048/207/5530/55957/2309/8900/4772/1870/  
tags=45%, 1019/7048/207/7424/1288/6777/4772/1277/7040/23236/3265/3552/5970/4790/3553/3  
tags=38%, 3122/23480/3685/3118/81035/3112/7059/3106/3135/3123/3126/338382/9103/30835/1  
tags=52%, 7412/6885/208/64764/3627/602/2921/182/207/7424/1385/5743/3600/9020/8809/5970  
tags=48%, 208/2770/7048/207/5515/2769/2776/7040/23236/624/7099/4615/3459/51135/5970/47  
tags=53%, 6885/208/2770/207/3306/3911/7040/10319/7099/3125/3127/4615/3459/51135/5970/4  
tags=31%, 7408/1536/9076/90952/3702/653361/1003/7852/3676/71/3689/1364/7409/4688/4313/  
tags=56%, 695/29760/2215/6885/208/4286/7048/207/1385/5530/8600/2354/4772/7040/9020/345  
tags=36%, 2776/4772/114548/7099/6196/4615/51135/10094/5970/4790/3553/920/7454/925/1009  
tags=43%, 4170/835/2081/142/207/3002/4001/1519/578/3265/9020/7277/5970/4790/5551/840/9  
tags=38%, 53833/4170/2273/207/53342/3594/6777/3600/3265/3459/50615/1441/6778/3574/3717  
tags=39%, 10971/6885/208/64764/7048/4214/207/1385/8900/6777/4772/1870/7040/7099/3265/4  
tags=38%, 578/7099/4615/23586/4940/103/51135/3552/5970/4790/3553/6504/916/9451/915/715  
tags=36%, 64170/114548/23236/7099/4615/4940/11337/5027/51135/5970/9051/4790/3553/4671/  
tags=35%, 5970/8148/4790/25942/6935/4318/2530/4314/2005/1848/7157/51804/3560/5154/5966  
tags=27%, 6502/9759/468/5594/3718/10379/3106/5925/7534/3135/3065/7185/1234/6850/4067/6  
tags=41%, 3768/5530/5743/112/5598/2776/4772/111/779/23236/3265/4659/8681/4881/817/6261  
tags=43%, 114548/578/7099/3125/3127/4615/23586/3459/8766/4940/103/51135/3552/5970/4790  
tags=31%, 136/4254/54518/1945/135/8817/51735/2903/2771/5154/6494/57568/108/5603/2846/2  
tags=42%, 920/6401/1001/3117/925/201633/940/57689/5788/3696/3122/80381/3685/7122/3118/  
tags=49%, 5700/4193/695/29760/10018/6885/208/3627/1019/930/5710/207/3516/8900/1870/578  
tags=31%, 3821/3822/22914/919/5335/399694/5594/5777/637/3106/3135/5533/962/6850/7535/4  
tags=45%, 2783/208/1910/2770/64764/7048/207/7424/1385/4322/112/1288/2769/1277/111/7040  
tags=28%, 117581/1655/867/7291/5603/5335/3685/5500/1278/5594/5777/80326/3082/4087/8826  
tags=43%, 114548/6157/7099/6130/4615/6165/23586/6154/4940/103/51135/5970/4790/3553/612  
tags=49%, 10663/2783/6354/208/2770/3627/2921/207/112/2309/6777/2776/111/23236/6351/123  
tags=42%, 1385/8411/5530/5993/64170/7040/7099/3125/3127/4615/7096/3459/51135/3552/5970  
tags=30%, 3696/4638/8515/399694/3685/5500/1278/5594/5728/7059/824/3675/3082/5228/7408/  
tags=36%, 4790/6935/7329/6768/1945/4318/4194/7157/1789/5154/4855/54541/672/3667/9759/9  
tags=34%, 51135/10094/7277/5970/4790/3553/840/4627/7132/10096/4671/55971/5603/3576/464  
tags=38%, 9133/5062/6885/2783/208/2770/207/200315/5530/684/2776/4772/85363/891/578/709  
tags=29%, 83439/5603/3576/5335/5594/10379/9641/2790/6772/637/3106/5925/3135/5533/1234/  
tags=35%, 1385/5530/5743/112/2776/4772/111/1870/23236/578/6351/3265/6891/5970/4790/355

tags=27%, 10096/7157/4671/823/8767/63916/5603/3576/23048/6352/5335/7322/5594/824/7321/  
tags=27%, 5154/3679/85464/1072/1730/3696/4638/3985/2846/8515/3685/5500/5594/3675/8826/  
tags=50%, 64764/5901/1019/7048/4214/207/1385/5530/112/8900/6777/4772/3600/111/1870/704  
tags=36%, 4909/7048/4214/207/7424/3306/5530/7786/5598/57551/4772/779/7040/1849/3265/61  
tags=43%, 10663/3606/944/6354/8718/93/53833/3627/657/2921/7048/133396/53342/2662/8600/  
tags=32%, 51135/10094/7277/5970/4790/8677/3553/1639/840/112574/7132/10096/4671/8767/63  
tags=49%, 5313/1337/1349/9167/5602/3643/6256/29796/4706/27089/1351/9377/6720/51085/472  
tags=49%, 493753/65260/1337/1349/9167/51287/51103/29796/51241/4706/27089/10891/1376/28  
tags=27%, 7483/3913/1741/3914/3280/8638/7132/3910/5933/7157/5649/5525/3679/4855/8324/9  
tags=27%, 5970/1441/4790/4254/3574/2323/3913/3717/3914/1945/8817/3910/200186/7157/5649  
tags=39%, 80778/57547/7637/7567/57615/284406/148254/147694/7571/146540/10780/163050/7  
tags=67%, 51091/124454/10667/23395/118672/55157/5188/54938/123263/80222/10352/57176/2  
tags=34%, 8648/182/7048/374654/5979/207/7424/1612/3911/5743/112/10161/1288/8313/23604/  
tags=31%, 4547/84647/2168/38/81579/335/50487/5407/1056/80168/39  
tags=55%, 54480/55454/337876/50515/64132/113189/64131/56548/55790/22856/51363  
tags=27%, 26503/1515/4669/3373/5641/9476/3920/10053/1512/6609/1508/245972/5476/411/151  
tags=43%, 4093/83729/93/657/7048/1634/5515/57154/7040/3397/4090/64750/652/4089/5933/56  
tags=29%, 729/1675/3689/3078/3687/5054/1604/3080/728/716/713/3075/714/5329/3684/718/11  
tags=36%, 80339/56894/224/26007/223/219/217/10327/132158/253558/501/2710/196051/3990/1  
tags=49%, 6654/6776/5604/1021/25759/2122/4616/4193/208/1019/7048/207/6777/1870/7040/57  
tags=52%, 11325/3190/9092/22985/2521/6625/10262/57187/57461/1665/51691/22827/22938/49  
tags=27%, 108/100137049/3576/2846/5335/399694/2917/5594/2778/5321/56895/26052/8605/10  
tags=64%, 8309/1582/10858/1593/10005/10998/23600/6342/51302  
tags=45%, 57107/38/51449/79947/10269/23590/10654/4598/39/3156  
tags=35%, 8633/64218/5530/10509/54910/54961/57522/3265/54361/1949/29984/5362/5998/817/  
tags=35%, 55437/79109/10542/220441/2887/127124/6520/7855/57600/1147/3643/83667/245973.  
tags=38%, 208/7704/207/8900/6777/3265/5970/4790/1848/597/83439/5594/10000/6932/3551/58  
tags=78%, 48/162417/3417/95/84706/50/51166/2805/2875/3418/3420/137362/3421/2806  
tags=40%, 2346/9963/686/8029/6948/25974/113235/335  
tags=37%, 4093/4617/83729/208/93/657/207/648/8313/3397/4090/3265/54361/55183/7994/7483  
tags=44%, 2746/760/377677/771/762/2747/766  
tags=48%, 122970/11332/1892/3033/641371/10965/51102/10449/79993/51144/51495/60481  
tags=52%, 122970/11332/51/30/641371/10965/79993/6342/8310/51144/51495/6319/60481  
tags=44%, 6809/6540/127124/6505/155066/245972/10497/245973/50617/529/525/535/5864/528/  
tags=26%, 6514/5313/3174/6927/3172  
tags=32%, 3552/5970/4790/3553/859/652/4318/6401/7132/7056/7157/5154/6612/2949/5603/368  
tags=34%, 10926/8900/1870/7040/701/891/990/4175/4089/11200/5933/29945/7157/7272/6502/9  
tags=32%, 11277/6351/23586/103/5970/4790/90865/3553/6352/9641/9447/3551/834/84265/4792  
tags=63%, 10588/6470/10841/10840/275/1719/6472/4524/123263/7298/4522/200895  
tags=45%, 4311/59272/3816/5476/2028/1636/183/5972/290  
tags=34%, 4659/136/8681/4881/135/4627/5592/140465/108/100137049/4638/94274/5500/5594/2  
tags=30%, 100137049/5603/3635/5335/5594/5321/8605/10000/6850/4067/5894/9846/7409/2206/  
tags=28%, 1870/578/3265/23586/4940/3646/5970/4790/9451/7132/7157/8554/91543/4599/5594/  
tags=31%, 55072/10616/6777/114548/7099/3459/29082/3552/6778/1540/90865/3553/8681/3717/  
tags=27%, 27329/350/345/4018/348/4036/336/1593/4043/3990/344/335  
tags=50%, 91860/810/6011/2979/2779/9187/5158/2978/801/3000  
tags=44%, 2525/8702/2651/2528/10402/79369/53947/2527/28/8706/2529/10678  
tags=50%, 205/249/204/9054/84284/79178/52

327/79799/29968/3242/54575/2729/53354/54658/54657/204/23498/54578/54576/8942/54600/90  
'51179/2653/132158/51/29968/55753/2746/1892/38/275/128/54363/5095/84706/50/113675/9104/  
7089/535/1351/9377/4720/1350/528/4704/4718/496/4719/4694/526/6392/4695/527/7386/4709/9/  
0901/2053/8528/54363/26063/10455/55825/5194/283927/5191/390916/189/1384/5825/196743/1/  
358/54578/54576/54600/54577/54659/54579/481/3781/6580/6256/760/9429/5243/2052/10998/48  
376/1593/10998/335/6342/81616/8310/5465/1622/5170  
578/54576/54600/54577/4258/54659/54579/9/83549/2948/119391/9446/4257/1854  
'54577/4258/54659/54579/9/56267/2948/119391/2052/221/873/9446/4257  
5723/6472/27430/5091/2805/4144/729020/2875/6120  
93/197322/6342/81616/8310/51144/39/51495/35/6319/60481  
105  
57/54578/54576/54600/54577/4258/54659/54579/316/2948/119391/221/9446/4257  
'2730/2937/9446/2880/4257/26873/290  
10449/1632/81616/8310  
54579/1586/7923/3291/6716/220074/79154/3284/1577/51144/6715/1585  
28/54578/54576/54600/54577/54659/54579/316/51109/9249/157506/54884  
181/540/4495/3163/26872/486/7779/4496/645745/140803/2512/4501/6546/482/3162/4493  
'2730/27430/2937/2805/4144/4191/10768  
'56922/501/5095/316/3033/64087/1629/594/27034/3028/84693/10449/197322/65985/1738/11112  
'54576/54600/54577/4258/54659/54579/8574/2948/119391/2052/221/873/9446/4257  
57/79723  
112849/384/501/2628/2805/5625/4942  
23498/501/8942/316/3033/51166/56267  
391/2271/1743/6390/3420  
9/84693/55902/81888/4191/1738/39

57/83594/23408

2/4191/1738/39/2271

55862/8803/55902/8310/1738/39  
35/2571/39/35  
576/54600/54577/54659/54579/9104/7358  
/2875/80150/2571

4/3163/2235/326625/645  
48/2571  
'275/9380/501/1757/113675/5723/6472/2628/189  
54576/54600/54577/54659/54579/7358  
'9296/523/9550/1188/534/51382

08/3109  
4876/958/7535/64421/3575/3932/6890/100  
/3105/3113/3134/3115/3108/3133/3109  
3113/2209/3115/716/3108/713/714/718/3109/715/87  
26/3119/942/3107/3105/3113/3134/3115/3108/3133/3109  
19/942/3107/3105/3113/3134/3115/3108/3133/3109  
43/3689/7042/3683/3383/5175/975/6347/6403/7058/2532/2995  
/3676/942/3113/3115/10673/3108/3601/56477/3109  
/3105/3113/3134/3115/3108/3133/3109  
1/3107/3689/3105/3113/836/3134/3115/1604/60/3683/3383/8672/5880/3908/3108/3133/857/310/  
317/2919/7100/2920/3684/718/4792/29108  
'3117/3122/3118/3112/6772/3123/3126/4087/7097/3119/64127/7043/3113/3115/7042/7100/6775/  
44/7414/2335/857/10109/3678

32/3676/71/22801/60/4000/3908/2697/784/3678  
'55/6364/6373/10563/7132/1236/3560/6846/6375/6363/3576/6352/6362/6348/6349/414062/3588.  
'5594/3118/5777/3112/6772/3123/3126/9103/1536/7097/3119/653361/3676/7043/3689/2212/4688  
9/917/919/5335/5594/5728/5777/6772/1460/4215/5533/10000/7097/29126/7535/3551/5894/2704  
685/6547/7168/2778/7171/3675/489/1756/109/3694/3676/7043/71/22801/7042/60/196883/4000/.  
I/3659/6372/3689/3394/929/834/836/353376/716/713/23643/714/3684/718/2353/715/3678/10392  
I/3553/6364/3727/4318/4314/5603/3576/5594/4312/9641/6280/3551/6372/23765/836/2919/3934/  
/915/3560/9794/5603/3122/4794/917/919/5335/5594/3718/3118/3112/6772/3123/3126/5533/371  
'2/5154/108/5594/2778/109/113457/112714/5894/7278/5156/84790/196883/1902/5332/2697/557  
115/3683/3383/728/716/3108/713/3075/714/3684/2213/718/6403/3109/715  
11/22801/131873/7148/1292/1293/1284/9899/1282/3908/960/3339/961/3918/2335/7058/3678/33  
/948/952/3122/928/917/3590/3118/3112/911/3123/3675/1438/3126/947/914/3119/3676/945/929/  
694/3676/7043/71/22801/7042/60/4000/3908/784/1906/3678  
85/5728/5925/3675/7185/10000/3551/9134/836/317/1284/1282/3908/1026/330/3918/7188/2335/  
52/6348/6349/414062/3118/4312/3112/3123/3126/1513/7097/3119/942/7043/6372/8792/3689/31  
18/3112/3106/3135/3123/3126/972/3119/1520/3310/3107/3105/3113/3134/3115/567/5721/3108/  
'6850/4067/653361/5894/3055/2212/9846/7409/10095/50807/2209/8612/10163/27040/5880/5579  
'/3553/3717/916/920/4089/3117/915/3560/5603/3122/4794/917/919/5335/5594/3718/3118/3112/  
8/5603/4794/917/919/5335/5594/5777/868/5533/10000/7535/3702/3551/5894/5063/7409/27040/.  
35/5594/5777/10859/5533/11025/10000/6850/4067/3551/5894/7409/5880/975/27071/5579/2213/  
0/23586/51135/5970/4790/1540/3553/7329/7132/597/6363/3576/5335/5971/1460/958/6366/7185  
'4/6348/6349/414062/9641/6772/958/1513/10000/7097/3551/942/929/7100/353376/3455/23643/.  
'03/5971/5594/10379/9641/6772/4046/3659/868/5533/30835/10000/6850/3551/5894/834/2207/15  
553/3913/3914/3910/3576/1511/1278/5272/2778/911/338382/1281/7097/7043/3689/929/3315/83  
'10000/109/6850/6786/4067/71/2212/2207/3937/103910/60/64805/196883/5332/83706/6916/102  
7040/891/3265/2113/5928/3552/5970/4790/11200/5933/7157/823/5603/3576/5500/5594/5728/31  
717/4089/6401/7056/5603/3576/5335/1278/5594/6772/4087/1281/1536/10000/7043/4313/836/70  
536/7097/3119/113457/112714/1520/653361/1311/71/3107/3689/2212/7278/929/4688/3105/436  
'/4790/6374/3553/6364/840/4318/6401/7132/4314/5603/6352/468/5594/3659/7185/10000/64127/  
90/3553/916/7132/2771/915/5603/3576/917/919/6352/5594/6348/6349/414062/2778/4087/10000  
790/3913/3717/240/3914/7132/3910/3117/2771/4261/5603/3122/5594/3118/3112/6772/3588/312  
1365/4267/103910/60/3683/3383/10398/5880/5175/83593/5579/3684/7414/10627/4689/83700/58  
9/3552/11006/5970/4790/1540/3553/3727/7132/10990/10326/10288/5603/55423/5971/5594/103  
'6/63916/5603/3576/5335/5594/9815/10000/7535/3551/3676/71/2212/7409/834/10095/10163/270  
451/7132/7157/332/823/597/6709/468/5594/1521/637/824/7185/1513/10000/113457/112714/152  
'78554/3560/5154/3953/3590/3718/10379/9180/338376/5777/6772/5617/3588/1438/5771/10000/9  
615/23586/51135/5970/6778/4790/3717/4318/4089/7157/332/5603/3576/468/5594/3718/9641/67  
7/3560/940/10399/917/51284/4599/3718/10379/9641/6772/637/1460/868/30835/51209/10000/70  
'22900/8767/22861/115362/51393/5603/3576/6352/5594/10379/9641/6772/9447/118429/10135/1  
'/597/1655/5546/4211/6929/3576/2138/3087/8842/2313/51274/3065/958/8013/3207/7185/2120/5  
672/3107/5423/8379/9134/890/5922/3105/836/7533/3134/1960/9586/896/5366/3133/6774/894/1  
'/5021/786/2771/782/140465/55799/108/952/100137049/4638/53632/6263/5500/5594/2778/5321/  
'/90865/3553/3717/7132/3117/56649/4261/3576/3122/6352/91543/51284/4599/5594/10379/3118.  
5865/5335/64411/5594/2778/9771/3082/5228/7408/10000/109/23683/2357/9170/5894/71/3689/7  
'3112/3106/3135/3123/3126/958/947/6402/4684/914/9076/3119/29126/90952/1003/3676/942/310  
'/3125/3127/4615/9020/23586/4940/51135/6891/5970/4790/25942/3280/916/3117/11047/915/715  
277/5894/3107/3689/7409/3105/836/2207/27040/3937/3683/3383/3932/5880/10870/3133/3455/7  
'/23236/3265/5970/4790/4318/2771/59345/6019/108/5603/468/399694/1278/5594/2778/4312/279  
'/10000/7097/10855/5894/71/7078/7409/4313/3316/4660/836/7074/7042/11211/60/2817/858/309  
'24/7132/4314/6217/6181/6191/200916/6138/5603/3576/5335/8829/51311/6173/51284/4599/6187.  
5/3265/6356/5908/5970/4790/729230/5197/6374/6355/3717/6364/6373/10563/7454/2870/2771/1  
'/4790/3553/3717/817/7132/3117/64581/8767/4261/5603/3122/5594/3118/3112/6772/4046/637/3  
'10000/3694/3676/3611/5894/1311/71/22801/131873/5063/7148/1292/7409/1293/4660/1284/103  
0427/5335/399694/5594/7168/5728/9839/23414/3065/8434/3925/1786/2146/472/3551/5894/925/  
'4/2846/5594/7122/5777/10672/9076/113457/112714/64005/9170/3551/71/5063/2212/1364/7278.  
9/3265/4615/51135/6891/5970/4790/916/920/7132/2771/915/60489/59345/1072/5603/3985/917/  
'10000/6850/4067/6932/3551/942/4277/5894/3055/3107/3105/836/3134/2919/9976/3091/3383/75  
3/7132/2771/7157/59345/108/5732/5603/3576/6352/468/3685/5594/6348/6349/414062/2778/279



10000/472/3551/3611/9252/71/831/929/5216/834/10095/3099/10163/7100/103910/5588/60/837/  
10672/3694/9170/7852/3676/5894/71/22801/3689/5063/3687/7409/5216/4660/10095/7074/1016/  
0/701/3125/3127/3265/9020/2113/5970/4790/4487/916/920/4089/11200/7132/2005/3117/20018/  
96/4615/2252/9020/11184/51135/80310/5908/3552/5970/4790/4254/3553/8681/2323/3727/1850/  
57007/3594/3600/7292/7040/6351/1235/8807/3459/6356/50615/2660/3552/8809/1441/729230/5/  
3916/399/5788/23207/83439/5603/3576/388/5287/5594/79443/338382/51209/10000/10121/7097/  
20/1350/4704/4718/4719/4694/2931/6392/4695/5465/7386/4709/5291/51422/4717/6391/4714/10/  
35521/1351/9377/79133/84987/4720/1350/4878/4704/4718/6009/388753/4719/8110/25915/4694/  
794/23462/3696/83439/8515/3685/4599/1278/5594/10379/5728/2778/9641/6772/7059/3659/265/  
3/5525/3560/5154/3679/59345/54541/672/3667/3696/4915/468/2846/8515/3685/1278/5594/3718/  
728/7730/7249/7673/147948/6432/7633/6885/7559/208/79862/10520/29990/90987/25799/84449/  
83459/79731/2193/55699  
3594/8900/6777/2776/3600/111/1870/7040/10319/23236/624/578/3265/54361/2252/3459/2113/1

4/50617/53/2799/8907/535/1497/23062/285362/79158/2519/164/2581/256471/54/10239/3916/8/  
963/9241/654/9765/7050/3625/2200/285704/5308/5594/4087/26585/4086/7043/10468/2331/704/  
91/11326/2/715/7450/710  
607/5407/1056/80168/55326/55750  
8/3265/1488/5970/4790/4089/7157/867/399694/5594/5925/3065/10000/3551/5894/7043/9846/7/  
4115/58517/55110/23451/4686/25766/3192/7307/6432/6632/11017/6636/3306/9984/10465/5164/  
572/10000/109/6850/9170/5894/9846/8527/5900/2206/8612/2207/5156/196883/9266/9265/1902/

1945/56963/2771/10512/10371/57689/85464/1072/2041/10507/3985/6259/5163/5335/8829/5594/  
529/525/79726/7976/7479/8649/6396/8322/528/6009/526/9470/6195/5170/64121/5291/5582/92/  
94/890/929/5371/2209/6774/862/3684/1436/4609

/3717/652/4089/8324/6498/4211/6929/5603/3625/5594/3718/1857/80326/4087/10000/6932/3976

6532/526/527/9296/523/9550/6538/534/51382/6511/10814/90423/1213/594855/160/6539

5/10000/4208/653361/1003/3551/71/4688/2950/4313/387082/4205/60/2817/6613/858/3383/588/  
96/8317/4174/4176/4171/5925/7534/3065/4087/472/23594/7043/4172/8379/9134/890/7533/7042/  
2/11035/3665/29108

778/3778/1909/5321/72/8605/5583/10672/109/800/4882/5894/10203/59/3779/4660/5588/19688/  
2207/27040/3937/241/5880  
10379/7122/9641/6772/637/5925/7534/10000/9076/3551/5894/1364/1365/836/7533/317/4939/97/  
817/7132/823/100137049/3718/10379/6772/637/824/5321/8605/1536/5836/834/353376/6775/67

54/1723/54577/54659/54579/124454/6697/51109/55312/57026/1719/4337/9104/6472/54995/735!  
'5723/6472/4967/189/84693/5091/8803/2098/2805/55902/2747/4524/4191/80201/729020/2875/6  
296/523/9550/4717/6391/4714/534/10975/4705/4728/4697/51382/6390/4715/374291/4696/1537/  
0005/92960/5824/23600/11264/83594/5826/5189/6342/255027/8310/10654/5192/5052/4598/341!  
i6/8431/5244

/39

9

'3108/6774/3460/3566/3109/3725

/6366/1234/7852/6372/51554/6357/6368/2919/6358/3587/6347/2920/1436/56477/7133  
3/3113/2209/3115/7042/3108/5579/3684/718/3460/4792/2353/4689/3109/65108/3725  
10/5588/353376/3091/3932/6774/3460/4792/2353/4773/3725  
3908/784/113/3678  
2/29108/3725/710  
'6347/2920/7188/7128/4792/2353/10758/3725  
4/3119/7535/3551/864/4853/4854/3113/3115/27040/5588/3932/6775/3108/3460/3566/4792/2353  
9/5159/113/3710/10376/84617/7846/203068  
  
371/7450/3915  
'3563/3113/3575/2209/3115/912/1604/3108/960/3684/3554/3566/1436/3109/3678  
  
'1643/4792/3915/4609  
113/2919/3115/7042/10673/3683/3383/3108/6347/2920/2353/3109/10312/3725  
'6890/3133/3109  
1/8877/2213/4082/10109/65108  
'6772/3123/3126/5533/4087/9466/3119/7535/3551/3113/3115/27040/5588/3091/3932/3108/196/6  
3937/5588/8440/3932/1326/4792/2353/4773/3725  
'4792/2353/8519/4773/3725  
5/6850/7535/4067/472/3551/8792/929/6357/2919/27040/10673/5588/353376/3383/3932/23643/2  
1326/4792/2353/3665/3725  
360/1263/26253/4792/1959/6237/3710/22808/29108/4773/3725  
36/2919/912/7042/1284/1282/3908/5332/2920/5579/3684/3554/3918/7414/2335/3915/87  
35/113/5742/10627/3710/7450  
106/824/5925/3135/5533/4087/10000/677/472/5894/7043/3107/9134/890/678/3105/3134/7042/50  
142/1284/5054/3383/1282/5332/6774/6347/5579/1958/2335/1906/3725  
0/3113/3134/2209/3115/11151/60/84790/3108/6890/3133/3684/2213/718/7058/4689/3109/715/1  
'3551/3976/9252/6372/836/3726/2919/9586/3383/9021/6347/2920/330/7188/197259/1326/7128/4  
1/7097/3551/7043/7042/5054/5332/713/714/6347/718/3460/4792/2353/3725  
23/3126/958/1234/10000/7097/3119/3551/3310/7043/3113/836/3115/7042/3587/3908/3108/6774/  
3494/87  
79/126014/6772/10859/54209/5533/9103/11025/1513/814/10000/6850/653361/3551/8792/2212/9  
140/3937/60/3932/5880/6347/391/9844/2335/4792/2353/10109/3678/29108/4773/3725  
0/472/3551/5894/71/7278/3563/836/1439/317/1616/60/84790/4000/5366/330/4792/2353/3710/1  
3466/3976/5894/3563/3575/1439/10401/3587/5156/896/6775/6774/9021/3455/894/1026/5159/36  
'72/637/5925/7534/10000/7097/3551/5894/7043/9134/890/836/317/7042/1960/9586/353376/677  
197/3551/3310/9134/836/317/4939/896/4600/6774/3455/894/2213/7128/4792/2353/3665/3725  
.536/64127/3551/24145/7158/114769/834/2919/4939/10628/837/5332/3455/6347/2920/330/7188/  
5081/4208/472/942/2078/5090/4086/890/929/64919/5371/2209/4297/894/1026/862/330/3684/643  
026/718/7188/9734/4792/3665/1959/5315/3725/87  
'5533/8605/814/109/4208/4882/5894/71/3759/4660/60/196883/10398/5332/784/1026/5579/113/2  
/7514/9641/3112/6772/637/3123/3126/11100/10000/3119/3551/5894/71/29107/10482/7177/3113  
'409/1969/5900/5216/7074/27040/3937/1268/60/3683/5156/196883/2260/1902/5880/285/5332/2  
17/3689/1364/6404/3105/3113/1365/3134/57502/4267/3115/3683/3383/5175/3108/3133/3384/368  
57/6502/5719/5603/3122/4794/917/919/5971/3718/10379/3118/9641/3112/6772/637/3106/5925/3  
'305/3384/5579/3460/4773  
10/4087/1281/10000/109/5894/408/59/4313/1284/9586/196883/1282/5332/54331/113/4792/2353/  
11/2260/4060/960/406991/6774/3339/2247/1026/2535/5329/3059/1839/5579/967/2335/857/2316/  
/5594/10379/140801/4312/6175/9641/6772/6146/6159/729/6168/1536/6193/6850/7097/1675/623  
1236/59345/6846/6375/108/6363/3576/6352/6362/5335/399694/5594/3718/6348/6349/414062/27  
3588/3123/3126/5533/9103/972/30835/10000/6850/7097/3119/64127/1520/5894/7043/3689/3687/  
310/60/5156/858/896/1282/10398/5880/7791/3908/64098/894/330/5579/3918/5159/7414/2335/8  
2/6624/4853/7078/4854/9134/7148/836/406996/1545/7042/5156/1788/960/406991/6774/894/102  
/1365/834/836/10095/10163/9871/3071/7100/60/837/84790/8440/9266/9265/1902/4542/6188/91  
'919/5335/5594/2790/637/3106/3135/5533/1234/10000/7097/472/3551/7852/5894/9582/3107/506  
538/285/3133/6774/3455/2247/1026/2920/54331/718/4792/2353/3665/3710/2791/4609/4773/372  
10/637/3106/5925/3588/3135/5533/1234/10672/10000/109/3551/7852/5894/11214/3107/3105/836

'9266/9265/10398/92610/5332/960/9181/3059/3554/718/7188/9844/7414/4792/10627/3710/3098/  
3/3071/103910/60/3683/5156/2260/1902/10398/5880/2247/3684/5159/9459/7414/2335/10627/62.  
;/29945/915/7157/3560/108/6929/996/3122/917/468/2114/8829/5971/5594/3718/3118/5728/7514  
'1945/8817/786/7132/2005/1848/7157/5154/782/55799/100137049/5603/4915/468/5971/8569/55'  
197/6374/90865/3574/3553/6355/6364/652/920/10220/6373/3557/10563/7132/1236/3560/6846/6  
113457/112714/6932/3551/5894/71/5063/7278/929/5216/834/836/10095/57381/3071/3831/7100/  
375/4705/4728/4697/8660/6390/4715/54205/374291/4696/1537/1329/4723/4701/4711/5562/6389  
'6392/4695/107/6195/7386/4709/51422/137682/9658/4717/6391/4714/10975/4705/4728/29078/4/  
08/3106/1857/5925/80326/3135/3675/3065/10000/3694/6932/472/3551/3676/5894/1311/9636/31/  
'9180/5728/2790/7059/5617/7534/3675/3082/5228/4602/10000/6850/7097/3694/9170/3551/3676.  
'7743/84874/5451/207/285268/57232/7773/57677/684/349075/390980/64170/7539/55786/578/31  
  
L488/5970/1441/6778/4790/4254/3574/2323/7483/3913/3717/8202/3914/817/840/3280/652/4318/

4572/427/527  
2/3399/3624/4052/4681/4609

)42/1026/1643/4792/4609  
;/4670/27316/23350/9775/199746/9410/25949/1659/23450/10450/9343/8175/144983/8559/22098  
1606/5332/8877/5159/113/6237/22808

./2048/7220/5533/6586/2042/7852/3611/5894/57556/5063/1969/2047/91653/103910/8440/5361/1  
96/55615/523/9550/4041/534/7477/10641/51382/58528/3480/51256/28956/7473/90423/9663/556

;/5894/4086/3198/11211/3720/3399/3624/2260/6774/2247/2535/463/7474/9314/4609

)/5175/9181/6347/3554/1843/857/2353/1906/3725  
;/9232/896/894/1026/994/2810/4609

3/10398/5332/5579/113/1906/3710/10267

'5/4600/6774/9021/3455/1026/4792/3665/4609  
74/3455/330/7188/3460/197259/7128/11035/29108

3/93100/80347/9249/349565/64802/79717/2730/27430/2937/554235/2677/4144/4338/2235/84274  
120/6392/8310/1738/5232/3418/39/6391/2271/5230/35/1743/6390/5631/3420  
1329/90423/4723/4701/5464/4711/495/6389/4722/4700/4713/4702/479/1353/4708/125965/7381/  
3/10478/55670/8800/4358/4843/847/1891/54677/2180

3109/4773/3725

774/3554/3460/3566/4792/2353/3109/4773/3725

920/330/5579/3554/7188/7128/4792

54/896/3133/894/1026/83593/90550/6237/3710/10758/22808/4609/4773

0376/3678/10312/84617/7846/203068  
792/2353/1906/11035/7133/3725

23643/330/3918/3460/4792/3109/3915

846/4688/3726/2209/7042/3937/3932/9021/3455/7305/3554/2213/3460/2355/1436/4792/2353/46

0376/3725/7846  
01/3460/3566/85480/4609  
5/6774/3339/1026/5579/1643/4792/2353/3665/1959/4609/4773/3725

90550/7128/4792/11035/3665/3710/84674/2634/3428/10392/29108/3725  
32/1436/1643/4609/604

9904/5997/2353/3710/57118/4773/3725  
834/836/5371/317/3115/4939/60/64499/896/3383/3108/4600/9021/3455/6347/5579/3460/4792/  
247/83593/5579/3684/10235/5159/113/51466/1436/6237/55740/22808  
34/6403/3109/6614/9019/83700/58494/1462  
3135/3123/3065/3126/958/10000/6850/7097/3119/4067/3551/864/9636/3107/9134/890/3105/311

1906/2791/3725  
6237/3710/7474/3678/22808/4609  
02197/3551/6868/9636/23521/2212/6224/834/4939/6142/11224/728/716/25873/6203/713/4600/  
90/6772/6366/1234/10000/109/3702/4067/653361/3551/7852/5894/408/3055/6372/7409/6357/63  
/2212/929/4360/3113/836/317/2209/3115/2207/7042/11151/3587/1263/26253/3108/3684/8877/2  
57/10627/7058/2316/3678/3371/7450/3915/3725/87  
6/5579/5159/994/4363/4082/7431/6659/3678/3371/4609  
81/4642/4641/3059/3554/4792/2353/10109/10376/29108/84617/3725/7846/203068  
3/3105/836/3134/567/25939/5880/8906/6890/3133/27350/5579/54331/7188/4792/2353/7133/37:  
5  
3/3134/567/9586/3587/5156/196883/5880/5332/6890/3133/6774/6347/1026/5579/3554/54331/71

'10109/3678/10392/29108/3725/87  
37/55740/10109/3678/7114/22808/87  
l/3112/3106/5925/3135/3123/3126/958/4215/5533/4087/10000/109/3119/472/3551/7043/3107/54  
94/1847/5321/3082/4215/5228/5533/8605/10000/4208/3925/6789/3551/5894/3310/408/9252/184  
54/6375/7293/939/6363/3576/8771/6352/3953/3625/6362/3590/6348/6349/414062/9180/338376/  
'103910/60/837/84790/9266/9265/10398/6188/23643/391/330/197259/9844/4792/2353/10627/11/  
l/4722/51094/4700/6945/10062/4713/83737/4702/4217/3630/4708/125965/7381/5564/5296/7385/  
697/6599/6390/4715/788/374291/4696/1537/1329/26291/6300/2180/4723/4701/4711/5562/28958  
07/22801/131873/4853/4854/9134/890/7148/1292/1293/3105/836/3134/1284/11211/9586/896/12  
/5894/1311/22801/131873/374/9134/7148/1292/1969/3563/1293/7533/3575/1284/9586/5156/896  
.25/3127/7695/55762/4615/57693/23586/162993/3459/4940/282890/219749/84914/51135/162966  
  
'4089/8817/3910/2771/7157/3560/405/332/5154/4855/59345/10023/8324/23462/108/6502/867/5'

8/6100/57819/6628/10915/1655/10594/3178/23020/151903/9129/55119/10189/6626/6430/9416/

l0398/6091/5880/2242/64221/23380/10505/2051/10627/6237/55740/7474/1808/4773  
32/8325/9681/6199/8131

4/10243/51004/53630/4351/11019/326625/1738

'9114/7385/7384/4731/4712



389/2274/4773/3725

3665/3109/29108

3/836/3134/317/3115/4939/567/3683/896/3383/3108/6890/3133/960/6774/3455/894/1026/953/71

6188/6774/3455/714/6347/1839/5579/718/6134/6136/4792/2353/6403/715/6202/6223/7450/3725  
68/7074/2919/6358/58191/1794/196883/5880/5332/6774/6347/2920/5579/10235/54331/2268/11  
213/718/3460/3109/10312

10/8905/2791/4773/3725

88/113/4792/3710/2791/4609/4773

123/3689/8379/4488/9134/890/3105/3113/3134/3115/7042/567/9232/9586/3683/896/196883/338:  
.6/7043/374/1844/5922/1969/929/3315/836/7042/1616/5156/2260/5880/285/784/2247/11221/557  
'608/5617/3588/1438/958/6366/9235/1234/9466/7852/3976/7043/3603/6372/8792/51554/6357/23  
035/2316/6237/113146/10109/10376/29109/4609/10392/29108/84617/3725/7846/302/203068/628  
/7384/4731/4712  
3/6389/4722/152831/57104/6199/4700/4713/7248/5568/2475/4702/4893/4217/2885/2181/5606/13  
82/3955/3908/4600/3133/3455/894/1026/2535/3918/5159/2335/7058/7474/3678/3371/7450/5315  
i/2260/1902/1282/285/3908/3455/894/2247/1026/54331/3918/5159/3566/1436/2335/7058/2791/3  
3/126070/6891/284307/9831/54753/5970/125893/4790/63934/3553/3717/57335/79788/84671/940  
  
732/23401/83439/2949/3576/2846/5335/3685/5594/3718/5728/2778/4312/2790/6772/637/2736/2

29896/6633/6427/10946/3310/7919/51690



188/7128/1643/4792/3665/3109/7431/4609/3725

5  
3/9844/56477/4792/2791

3/3932/7538/64784/3108/3133/894/1026/3554/3601/1958/4316/113/4792/2353/3109/1959/706/4/  
'9/10235/3554/1843/5159/1326/994/9448/1436/2353/2316/6237/22808/4609/3725  
3765/3563/94/6368/3575/1439/2919/7042/6358/58191/10673/3587/3624/3455/6347/2920/3554/3/  
31

374/1353/4708/125965/23305/6655/7381/5564/63976/55471/7385/7384/353500/4731/4712  
5/3915/10312  
678/3371/7450/3915/4609  
39/5199/9451/163071/140612/7132/79088/3117/7157/7767/121274/55900/55659/342909/8890/7  
6508/1857/5925/80326/3675/1909/3065/1438/3082/5228/7185/4087/3714/10672/10000/109/6932





309/4773/3725

301/3460/3566/1436/85480/56477/7133

574/7692/84527/7694/10308/7752/115509/55769/126017/65243/81931/3122/163227/6352/54811

2/6789/9170/3551/7852/5894/9252/7043/4853/4854/9134/890/5900/3563/2950/4313/836/3575/14







/90649/91975/29992/170960/339559/57209/5500/81856/146198/10379/3118/9641/136051/3112/  
139/5371/317/7042/1284/11211/5156/896/196883/3091/2260/1902/1282/5880/6775/3908/5332/5:





6772/637/3106/3135/10189/3123/6430/3126/972/51427/10000/6427/6850/7097/3119/3551/16265

366/6774/3455/894/2247/1026/2535/862/83593/330/5579/10235/54331/3918/5159/3601/7188/11







55/6672/3107/80818/26152/90321/148156/90338/10793/10482/3105/3113/836/3134/5371/317/80  
3/3460/3566/1436/2335/1643/4792/2353/1906/7474/2791/3915/4609/3725





264/3115/4939/567/389114/1616/3108/6890/3133/9021/3455/6347/330/718/7188/3460/4792/366





i5/3109/3678
