# Supplementary material for: The Potential Diagnostic Value of Immune-Related Genes in Interstitial Fibrosis and Tubular Atrophy after Kidney Transplantation
Source: Hindawi journal article supplement (doi:10.1155/2022/7212852), 2022-06-17
Supplement: f1 [file 7212852.f1.zip]

| NAME      | GS<br> follow link to MSigDB                            | GS DETAIL   |
|-----------|---------------------------------------------------------|-------------|
| KEGG ANT  | KEGG ANTIGEN PROCESSING AND PRESENTATION                | Details ... |
| KEGG AUT  | KEGG AUTOIMMUNE THYROID DISEASE                         | Details ... |
| KEGG TOL  | KEGG TOLL LIKE RECEPTOR SIGNALING PATHWAY               | Details ... |
| KEGG NAT  | KEGG NATURAL KILLER CELL MEDIATED CYTOTOXICITY          | Details ... |
| KEGG CELL | KEGG CELL ADHESION MOLECULES CAMS                       | Details ... |
| KEGG CYT  | KEGG CYTOSOLIC DNA SENSING PATHWAY                      | Details ... |
| KEGG CHE  | KEGG CHEMOKINE SIGNALING PATHWAY                        | Details ... |
| KEGG NOD  | KEGG NOD LIKE RECEPTOR SIGNALING PATHWAY                | Details ... |
| KEGG T CE | KEGG T CELL RECEPTOR SIGNALING PATHWAY                  | Details ... |
| KEGG CYT  | KEGG CYTOKINE CYTOKINE RECEPTOR INTERACTION             | Details ... |
| KEGG B CE | KEGG B CELL RECEPTOR SIGNALING PATHWAY                  | Details ... |
| KEGG INTE | KEGG INTESTINAL IMMUNE NETWORK FOR IGA PRODUCTION       | Details ... |
| KEGG SYS  | KEGG SYSTEMIC LUPUS ERYTHEMATOSUS                       | Details ... |
| KEGG ALL  | KEGG ALLOGRAFT REJECTION                                | Details ... |
| KEGG TYPE | KEGG TYPE I DIABETES MELLITUS                           | Details ... |
| KEGG FC G | KEGG FC GAMMA R MEDIATED PHAGOCYTOSIS                   | Details ... |
| KEGG HEM  | KEGG HEMATOPOIETIC CELL LINEAGE                         | Details ... |
| KEGG GRA  | KEGG GRAFT VERSUS HOST DISEASE                          | Details ... |
| KEGG LEIS | KEGG LEISHMANIA INFECTION                               | Details ... |
| KEGG PATI | KEGG PATHOGENIC ESCHERICHIA COLI INFECTION              | Details ... |
| KEGG PRIC | KEGG PRION DISEASES                                     | Details ... |
| KEGG GLY  | KEGG GLYCOSAMINOGLYCAN BIOSYNTHESIS CHONDROITIN SULFATE | Details ... |
| KEGG JAK  | KEGG JAK STAT SIGNALING PATHWAY                         | Details ... |
| KEGG APO  | KEGG APOPTOSIS                                          | Details ... |
| KEGG AST  | KEGG ASTHMA                                             | Details ... |
| KEGG LEU  | KEGG LEUKOCYTE TRANSENDOTHELIAL MIGRATION               | Details ... |
| KEGG PRIN | KEGG PRIMARY IMMUNODEFICIENCY                           | Details ... |
| KEGG FC E | KEGG FC EPSILON RI SIGNALING PATHWAY                    | Details ... |
| KEGG MAF  | KEGG MAPK SIGNALING PATHWAY                             | Details ... |
| KEGG PATI | KEGG PATHWAYS IN CANCER                                 | Details ... |

| SIZE | ES       | NES      | NOM p-val | FDR q-val | FWER p-val | RANK AT LEADING EDGE         |
|------|----------|----------|-----------|-----------|------------|------------------------------|
| 86   | 0.637674 | 1.80744  | 0.01626   | 0.198152  | 0.144      | 2895 tags=44%, list=16%, sig |
| 44   | 0.74458  | 1.80474  | 0.008147  | 0.101305  | 0.148      | 2555 tags=57%, list=14%, sig |
| 98   | 0.607373 | 1.796019 | 0.004124  | 0.075449  | 0.159      | 2903 tags=34%, list=16%, sig |
| 127  | 0.607632 | 1.766854 | 0.004184  | 0.079395  | 0.206      | 2742 tags=35%, list=15%, sig |
| 128  | 0.612923 | 1.758741 | 0.004107  | 0.070061  | 0.22       | 2904 tags=47%, list=16%, sig |
| 50   | 0.621646 | 1.752431 | 0.006466  | 0.063044  | 0.232      | 1804 tags=22%, list=10%, sig |
| 175  | 0.643299 | 1.720948 | 0.002137  | 0.078175  | 0.289      | 1901 tags=34%, list=11%, sig |
| 60   | 0.679667 | 1.718522 | 0.008316  | 0.070382  | 0.297      | 1946 tags=38%, list=11%, sig |
| 102  | 0.589614 | 1.707745 | 0.008493  | 0.070875  | 0.326      | 2904 tags=37%, list=16%, sig |
| 227  | 0.608139 | 1.704341 | 0.00211   | 0.066931  | 0.339      | 2153 tags=37%, list=12%, sig |
| 74   | 0.558901 | 1.688296 | 0.010504  | 0.070246  | 0.368      | 3066 tags=38%, list=17%, sig |
| 42   | 0.74136  | 1.687857 | 0.012295  | 0.064579  | 0.368      | 2572 tags=62%, list=15%, sig |
| 52   | 0.790584 | 1.682236 | 0.004115  | 0.063299  | 0.383      | 1880 tags=65%, list=11%, sig |
| 33   | 0.81183  | 1.673049 | 0.008163  | 0.06476   | 0.407      | 2571 tags=79%, list=15%, sig |
| 41   | 0.717802 | 1.662224 | 0.018256  | 0.067585  | 0.434      | 2571 tags=63%, list=15%, sig |
| 95   | 0.544154 | 1.653037 | 0.012346  | 0.069252  | 0.456      | 1570 tags=25%, list=9%, sig  |
| 80   | 0.671442 | 1.652822 | 0.004149  | 0.065357  | 0.457      | 1889 tags=49%, list=11%, sig |
| 40   | 0.775701 | 1.647167 | 0.014706  | 0.065922  | 0.473      | 2571 tags=68%, list=15%, sig |
| 70   | 0.731231 | 1.642194 | 0.014433  | 0.065617  | 0.486      | 2575 tags=60%, list=15%, sig |
| 54   | 0.533335 | 1.638392 | 0.018     | 0.064872  | 0.497      | 1614 tags=22%, list=9%, sig  |
| 34   | 0.606233 | 1.637546 | 0.012422  | 0.062426  | 0.5        | 847 tags=24%, list=5%, sig   |
| 22   | 0.627394 | 1.634535 | 0.024048  | 0.06142   | 0.509      | 3458 tags=55%, list=20%, sig |
| 131  | 0.467417 | 1.623149 | 0.014199  | 0.065394  | 0.534      | 2786 tags=31%, list=16%, sig |
| 83   | 0.444357 | 1.59466  | 0.034765  | 0.081487  | 0.592      | 2807 tags=30%, list=16%, sig |
| 23   | 0.812747 | 1.586863 | 0.025794  | 0.083455  | 0.603      | 1872 tags=78%, list=11%, sig |
| 109  | 0.53842  | 1.584039 | 0.006085  | 0.082522  | 0.609      | 1214 tags=23%, list=7%, sig  |
| 33   | 0.765356 | 1.569317 | 0.021277  | 0.091066  | 0.653      | 1248 tags=52%, list=7%, sig  |
| 70   | 0.445848 | 1.527942 | 0.0375    | 0.121978  | 0.739      | 1570 tags=19%, list=9%, sig  |
| 245  | 0.343546 | 1.401129 | 0.046939  | 0.225204  | 0.911      | 2865 tags=25%, list=16%, sig |
| 306  | 0.345007 | 1.398404 | 0.045098  | 0.222292  | 0.916      | 3472 tags=31%, list=20%, sig |

ᵍnal=53%  
ᵍnal=66%  
ᵍnal=40%  
ᵍnal=41%  
ᵍnal=56%  
ᵍnal=24%  
ᵍnal=37%  
ᵍnal=43%  
ᵍnal=44%  
ᵍnal=42%  
ᵍnal=46%  
ᵍnal=72%  
ᵍnal=73%  
ᵍnal=92%  
ᵍnal=74%  
ᵗal=28%  
ᵍnal=54%  
ᵍnal=79%  
ᵍnal=70%  
ᵗal=24%  
ᵗal=25%  
ᵍnal=68%  
ᵍnal=36%  
ᵍnal=36%  
ᵍnal=87%  
ᵗal=24%  
ᵗal=55%  
ᵗal=20%  
ᵍnal=29%  
ᵍnal=38%
