# Supplementary material for: The Potential Diagnostic Value of Immune-Related Genes in Interstitial Fibrosis and Tubular Atrophy after Kidney Transplantation
Source: Hindawi journal article supplement (doi:10.1155/2022/7212852), 2022-06-17
Supplement: f1 [file 7212852.f1.zip]

| NAME      | GS<br> fo GS | DETAIL SIZE | ES  | NES      | NOM p-val | FDR q-val | FWER p-val |       |
|-----------|--------------|-------------|-----|----------|-----------|-----------|------------|-------|
| KEGG OXII | KEGG OXII    | Details ... | 95  | -0.47599 | -1.90175  | 0.008602  | 0.050945   | 0.053 |
| KEGG PARI | KEGG PARI    | Details ... | 88  | -0.41383 | -1.82593  | 0.01996   | 0.07391    | 0.127 |
| KEGG VALI | KEGG VALI    | Details ... | 43  | -0.66442 | -1.6959   | 0.02449   | 0.21618    | 0.364 |
| KEGG CITR | KEGG CITR    | Details ... | 29  | -0.64524 | -1.64753  | 0.032129  | 0.257977   | 0.458 |
| KEGG PYRI | KEGG PYRI    | Details ... | 37  | -0.57823 | -1.63627  | 0.035052  | 0.226979   | 0.485 |
| KEGG LYSI | KEGG LYSI    | Details ... | 42  | -0.51681 | -1.5968   | 0.042424  | 0.272186   | 0.591 |
| KEGG ARG  | KEGG ARG     | Details ... | 51  | -0.56793 | -1.58384  | 0.042339  | 0.262352   | 0.625 |
| KEGG PRO  | KEGG PRO     | Details ... | 28  | -0.62151 | -1.56635  | 0.046843  | 0.267578   | 0.655 |
| KEGG HIST | KEGG HIST    | Details ... | 26  | -0.64429 | -1.56565  | 0.03681   | 0.239476   | 0.655 |
| KEGG TERF | KEGG TERF    | Details ... | 15  | -0.63185 | -1.52638  | 0.058594  | 0.301051   | 0.747 |
| KEGG GLYI | KEGG GLYI    | Details ... | 30  | -0.69368 | -1.51246  | 0.072435  | 0.30218    | 0.765 |
| KEGG BUTI | KEGG BUTI    | Details ... | 31  | -0.62814 | -1.50771  | 0.066398  | 0.286475   | 0.769 |
| KEGG GLYI | KEGG GLYI    | Details ... | 26  | -0.51893 | -1.46156  | 0.036822  | 0.37503    | 0.843 |
| KEGG TYR  | KEGG TYR     | Details ... | 36  | -0.52326 | -1.45354  | 0.06544   | 0.366268   | 0.856 |
| KEGG PRO  | KEGG PRO     | Details ... | 20  | -0.62909 | -1.45092  | 0.062753  | 0.347621   | 0.862 |
| KEGG CYS  | KEGG CYS     | Details ... | 32  | -0.4563  | -1.43381  | 0.07332   | 0.363087   | 0.883 |
| KEGG AMI  | KEGG AMI     | Details ... | 21  | -0.53882 | -1.41227  | 0.117647  | 0.388466   | 0.905 |
| KEGG BET  | KEGG BET     | Details ... | 20  | -0.59901 | -1.3945   | 0.149194  | 0.405966   | 0.924 |
| KEGG PER  | KEGG PER     | Details ... | 75  | -0.47311 | -1.38568  | 0.184676  | 0.404871   | 0.927 |
| KEGG GLYI | KEGG GLYI    | Details ... | 54  | -0.44851 | -1.35959  | 0.138776  | 0.442679   | 0.94  |
| KEGG BIOS | KEGG BIOS    | Details ... | 21  | -0.4847  | -1.35021  | 0.137795  | 0.442744   | 0.941 |
| KEGG MAT  | KEGG MAT     | Details ... | 19  | -0.54201 | -1.34135  | 0.108738  | 0.444408   | 0.945 |
| KEGG SNA  | KEGG SNA     | Details ... | 35  | -0.41927 | -1.33947  | 0.140845  | 0.429216   | 0.947 |
| KEGG GLYI | KEGG GLYI    | Details ... | 44  | -0.40736 | -1.33895  | 0.08866   | 0.412226   | 0.948 |
| KEGG GAL  | KEGG GAL     | Details ... | 23  | -0.45    | -1.33574  | 0.131474  | 0.401619   | 0.948 |
| KEGG OLF  | KEGG OLF     | Details ... | 60  | -0.42947 | -1.30105  | 0.161943  | 0.462228   | 0.965 |
| KEGG PHEI | KEGG PHEI    | Details ... | 17  | -0.53924 | -1.2851   | 0.174349  | 0.480008   | 0.969 |
| KEGG AMI  | KEGG AMI     | Details ... | 43  | -0.39414 | -1.28394  | 0.188716  | 0.465673   | 0.969 |
| KEGG HUN  | KEGG HUN     | Details ... | 149 | -0.24054 | -1.2621   | 0.172708  | 0.497078   | 0.974 |
| KEGG REGI | KEGG REGI    | Details ... | 31  | -0.34926 | -1.25523  | 0.225673  | 0.493866   | 0.976 |
| KEGG ALZI | KEGG ALZI    | Details ... | 135 | -0.28248 | -1.23299  | 0.144309  | 0.524726   | 0.982 |
| KEGG ALAI | KEGG ALAI    | Details ... | 29  | -0.47685 | -1.19514  | 0.269076  | 0.593486   | 0.992 |
| KEGG FAT  | KEGG FAT     | Details ... | 41  | -0.41157 | -1.15651  | 0.338614  | 0.666054   | 0.997 |
| KEGG TRYI | KEGG TRYI    | Details ... | 37  | -0.46383 | -1.15622  | 0.336634  | 0.647264   | 0.997 |
| KEGG NITR | KEGG NITR    | Details ... | 22  | -0.42294 | -1.14833  | 0.291837  | 0.646094   | 0.997 |
| KEGG LINC | KEGG LINC    | Details ... | 22  | -0.47585 | -1.10295  | 0.347015  | 0.733865   | 0.999 |
| KEGG PPAI | KEGG PPAI    | Details ... | 63  | -0.39639 | -1.0663   | 0.363813  | 0.803466   | 1     |
| KEGG TYPE | KEGG TYPE    | Details ... | 45  | -0.2853  | -1.0656   | 0.312621  | 0.784018   | 1     |
| KEGG RETI | KEGG RETI    | Details ... | 50  | -0.45565 | -1.05799  | 0.446721  | 0.781876   | 1     |
| KEGG GLYI | KEGG GLYI    | Details ... | 25  | -0.32545 | -1.05767  | 0.39839   | 0.763006   | 1     |
| KEGG CAR  | KEGG CAR     | Details ... | 60  | -0.47129 | -1.05265  | 0.447791  | 0.756141   | 1     |
| KEGG FRU  | KEGG FRU     | Details ... | 32  | -0.33596 | -1.04492  | 0.422311  | 0.756061   | 1     |
| KEGG PEN  | KEGG PEN     | Details ... | 22  | -0.53943 | -1.02966  | 0.5125    | 0.771867   | 1     |
| KEGG INSL | KEGG INSL    | Details ... | 133 | -0.26633 | -1.01936  | 0.437113  | 0.776523   | 1     |
| KEGG ASCI | KEGG ASCI    | Details ... | 19  | -0.5741  | -1.01521  | 0.533881  | 0.768642   | 1     |
| KEGG CALI | KEGG CALI    | Details ... | 152 | -0.30962 | -1.00748  | 0.447525  | 0.769756   | 1     |
| KEGG MISI | KEGG MISI    | Details ... | 23  | -0.3679  | -0.98629  | 0.501062  | 0.799317   | 1     |
| KEGG GLYI | KEGG GLYI    | Details ... | 21  | -0.32421 | -0.98535  | 0.479612  | 0.784607   | 1     |
| KEGG PEN  | KEGG PEN     | Details ... | 25  | -0.3161  | -0.97882  | 0.484314  | 0.78281    | 1     |
| KEGG VIBR | KEGG VIBR    | Details ... | 52  | -0.27708 | -0.97841  | 0.486869  | 0.768164   | 1     |
| KEGG SELE | KEGG SELE    | Details ... | 23  | -0.37034 | -0.97396  | 0.514286  | 0.762393   | 1     |
| KEGG DRU  | KEGG DRU     | Details ... | 62  | -0.39963 | -0.96447  | 0.504219  | 0.767634   | 1     |
| KEGG SPHI | KEGG SPHI    | Details ... | 35  | -0.33608 | -0.95139  | 0.516393  | 0.780827   | 1     |
| KEGG PAN  | KEGG PAN     | Details ... | 16  | -0.39317 | -0.93231  | 0.579158  | 0.804987   | 1     |
| KEGG GLU  | KEGG GLU     | Details ... | 47  | -0.29684 | -0.92731  | 0.567251  | 0.80055    | 1     |
| KEGG ONE  | KEGG ONE     | Details ... | 17  | -0.34743 | -0.92286  | 0.531621  | 0.795413   | 1     |
| KEGG NOT  | KEGG NOT     | Details ... | 46  | -0.25199 | -0.90399  | 0.580952  | 0.819487   | 1     |

|           |           |             |     |          |          |          |          |   |
|-----------|-----------|-------------|-----|----------|----------|----------|----------|---|
| KEGG NUC  | KEGG NUC  | Details ... | 42  | -0.28198 | -0.89975 | 0.582441 | 0.81353  | 1 |
| KEGG HED  | KEGG HED  | Details ... | 49  | -0.25815 | -0.89495 | 0.631579 | 0.808906 | 1 |
| KEGG NEU  | KEGG NEU  | Details ... | 192 | -0.26925 | -0.89176 | 0.624528 | 0.801036 | 1 |
| KEGG NIC  | KEGG NIC  | Details ... | 22  | -0.33067 | -0.85907 | 0.648221 | 0.850923 | 1 |
| KEGG STEF | KEGG STEF | Details ... | 17  | -0.34148 | -0.85369 | 0.672584 | 0.847762 | 1 |
| KEGG GLIC | KEGG GLIC | Details ... | 64  | -0.22683 | -0.84484 | 0.727451 | 0.851494 | 1 |
| KEGG TAS  | KEGG TAS  | Details ... | 26  | -0.28523 | -0.8252  | 0.727092 | 0.873799 | 1 |
| KEGG MET  | KEGG MET  | Details ... | 58  | -0.33131 | -0.82431 | 0.66875  | 0.861862 | 1 |
| KEGG PUR  | KEGG PUR  | Details ... | 144 | -0.18266 | -0.81956 | 0.821138 | 0.856696 | 1 |
| KEGG DRU  | KEGG DRU  | Details ... | 44  | -0.35394 | -0.81575 | 0.636735 | 0.850124 | 1 |
| KEGG STAI | KEGG STAI | Details ... | 43  | -0.33151 | -0.8009  | 0.7119   | 0.862624 | 1 |
| KEGG MEL  | KEGG MEL  | Details ... | 65  | -0.20416 | -0.78895 | 0.84585  | 0.869839 | 1 |
| KEGG INO  | KEGG INO  | Details ... | 52  | -0.20172 | -0.78859 | 0.816456 | 0.85795  | 1 |
| KEGG HON  | KEGG HON  | Details ... | 24  | -0.21741 | -0.78171 | 0.763975 | 0.857223 | 1 |
| KEGG GLY  | KEGG GLY  | Details ... | 25  | -0.23271 | -0.72587 | 0.876228 | 0.926841 | 1 |
| KEGG STEF | KEGG STEF | Details ... | 46  | -0.26707 | -0.70373 | 0.798    | 0.944218 | 1 |
| KEGG PRO  | KEGG PRO  | Details ... | 20  | -0.23657 | -0.69597 | 0.757455 | 0.940982 | 1 |
| KEGG POR  | KEGG POR  | Details ... | 33  | -0.28597 | -0.66112 | 0.760915 | 0.966335 | 1 |
| KEGG OOC  | KEGG OOC  | Details ... | 102 | -0.1717  | -0.63634 | 0.983087 | 0.977598 | 1 |
| KEGG BASI | KEGG BASI | Details ... | 33  | -0.18085 | -0.62348 | 0.90297  | 0.975964 | 1 |
| KEGG MTC  | KEGG MTC  | Details ... | 50  | -0.15943 | -0.60851 | 0.975758 | 0.974978 | 1 |
| KEGG HYP  | KEGG HYP  | Details ... | 76  | -0.26349 | -0.6071  | 0.89391  | 0.963528 | 1 |
| KEGG BAS  | KEGG BAS  | Details ... | 31  | -0.18076 | -0.53354 | 0.934461 | 0.991708 | 1 |
| KEGG RNA  | KEGG RNA  | Details ... | 53  | -0.15084 | -0.48693 | 0.948498 | 0.993821 | 1 |
| KEGG N GI | KEGG N GI | Details ... | 44  | -0.12166 | -0.43653 | 0.99211  | 0.991181 | 1 |

## RANK AT LEADING EDGE

7057 tags=76%, list=40%, signal=125%  
7057 tags=75%, list=40%, signal=124%  
4021 tags=72%, list=23%, signal=93%  
5119 tags=69%, list=29%, signal=97%  
4769 tags=62%, list=27%, signal=85%  
4021 tags=40%, list=23%, signal=52%  
4525 tags=55%, list=26%, signal=74%  
4747 tags=71%, list=27%, signal=97%  
3775 tags=65%, list=21%, signal=83%  
5873 tags=80%, list=33%, signal=120%  
3616 tags=73%, list=20%, signal=92%  
4021 tags=65%, list=23%, signal=83%  
3523 tags=54%, list=20%, signal=67%  
3728 tags=50%, list=21%, signal=63%  
4303 tags=50%, list=24%, signal=66%  
4103 tags=44%, list=23%, signal=57%  
6400 tags=71%, list=36%, signal=112%  
3885 tags=60%, list=22%, signal=77%  
3497 tags=49%, list=20%, signal=61%  
3775 tags=44%, list=21%, signal=56%  
3803 tags=48%, list=21%, signal=61%  
3049 tags=42%, list=17%, signal=51%  
1177 tags=14%, list=7%, signal=15%  
1549 tags=27%, list=9%, signal=30%  
4202 tags=39%, list=24%, signal=51%  
5958 tags=60%, list=34%, signal=90%  
3593 tags=53%, list=20%, signal=66%  
4588 tags=40%, list=26%, signal=53%  
7254 tags=58%, list=41%, signal=98%  
7463 tags=55%, list=42%, signal=95%  
6036 tags=52%, list=34%, signal=78%  
1711 tags=34%, list=10%, signal=38%  
4021 tags=56%, list=23%, signal=72%  
2192 tags=46%, list=12%, signal=52%  
4589 tags=45%, list=26%, signal=61%  
607 tags=18%, list=3%, signal=19%  
3934 tags=46%, list=22%, signal=59%  
4805 tags=33%, list=27%, signal=46%  
6263 tags=64%, list=35%, signal=99%  
6313 tags=48%, list=36%, signal=75%  
5973 tags=65%, list=34%, signal=98%  
3278 tags=25%, list=19%, signal=31%  
4405 tags=50%, list=25%, signal=66%  
4805 tags=30%, list=27%, signal=41%  
7396 tags=95%, list=42%, signal=163%  
3389 tags=38%, list=19%, signal=47%  
5170 tags=43%, list=29%, signal=61%  
4090 tags=43%, list=23%, signal=56%  
3699 tags=36%, list=21%, signal=45%  
3237 tags=25%, list=18%, signal=31%  
5451 tags=57%, list=31%, signal=82%  
5073 tags=52%, list=29%, signal=72%  
1715 tags=26%, list=10%, signal=28%  
2432 tags=31%, list=14%, signal=36%  
3670 tags=34%, list=21%, signal=43%  
4518 tags=59%, list=26%, signal=79%  
2875 tags=20%, list=16%, signal=23%

4575 tags=33%, list=26%, signal=45%  
4102 tags=35%, list=23%, signal=45%  
3083 tags=35%, list=17%, signal=42%  
3755 tags=55%, list=21%, signal=69%  
2049 tags=18%, list=12%, signal=20%  
2615 tags=16%, list=15%, signal=18%  
2664 tags=27%, list=15%, signal=32%  
6263 tags=55%, list=35%, signal=85%  
2175 tags=13%, list=12%, signal=14%  
4476 tags=43%, list=25%, signal=58%  
7396 tags=67%, list=42%, signal=116%  
3631 tags=20%, list=21%, signal=25%  
6092 tags=40%, list=34%, signal=61%  
4575 tags=29%, list=26%, signal=39%  
2290 tags=20%, list=13%, signal=23%  
4730 tags=35%, list=27%, signal=47%  
8650 tags=55%, list=49%, signal=107%  
6263 tags=64%, list=35%, signal=98%  
2958 tags=15%, list=17%, signal=18%  
4761 tags=27%, list=27%, signal=37%  
1353 tags=8%, list=8%, signal=9%  
4687 tags=42%, list=26%, signal=57%  
13158 tags=97%, list=74%, signal=377%  
5344 tags=26%, list=30%, signal=38%  
2195 tags=9%, list=12%, signal=10%
