# Supplementary material for: The Potential Diagnostic Value of Immune-Related Genes in Interstitial Fibrosis and Tubular Atrophy after Kidney Transplantation
Source: Hindawi journal article supplement (doi:10.1155/2022/7212852), 2022-06-17
Supplement: f1 [file 7212852.f1.zip]

| ID       | Description  | setSize | enrichment | NES      | pvalue   | p.adjust | qvalues  | rank |
|----------|--------------|---------|------------|----------|----------|----------|----------|------|
| hsa05022 | Pathways c   | 402     | 0.291082   | 1.544246 | 0.001422 | 0.008143 | 0.003836 | 4219 |
| hsa05010 | Alzheimer    | 312     | 0.344131   | 1.785856 | 0.001453 | 0.008143 | 0.003836 | 4219 |
| hsa05014 | Amyotroph    | 305     | 0.304613   | 1.572003 | 0.001479 | 0.008143 | 0.003836 | 4176 |
| hsa05016 | Huntington   | 254     | 0.374759   | 1.895532 | 0.001493 | 0.008143 | 0.003836 | 4176 |
| hsa05012 | Parkinson    | 203     | 0.417162   | 2.041583 | 0.001515 | 0.008143 | 0.003836 | 2996 |
| hsa05020 | Prion disea  | 228     | 0.344295   | 1.712522 | 0.001517 | 0.008143 | 0.003836 | 3089 |
| hsa04714 | Thermogel    | 189     | 0.455631   | 2.20935  | 0.001527 | 0.008143 | 0.003836 | 2966 |
| hsa04152 | AMPK sign    | 115     | 0.364479   | 1.653893 | 0.001577 | 0.008143 | 0.003836 | 2479 |
| hsa01200 | Carbon me    | 110     | 0.642886   | 2.898094 | 0.001585 | 0.008143 | 0.003836 | 2824 |
| hsa05017 | Spinocereb   | 123     | 0.349146   | 1.598803 | 0.001587 | 0.008143 | 0.003836 | 4532 |
| hsa01240 | Biosynthes   | 142     | 0.515782   | 2.408857 | 0.001603 | 0.008143 | 0.003836 | 4074 |
| hsa04932 | Non-alcoh    | 137     | 0.443882   | 2.065397 | 0.001603 | 0.008143 | 0.003836 | 3276 |
| hsa04723 | Retrograde   | 121     | 0.365388   | 1.665639 | 0.001605 | 0.008143 | 0.003836 | 2687 |
| hsa00310 | Lysine deg   | 59      | 0.453493   | 1.826277 | 0.001616 | 0.008143 | 0.003836 | 4200 |
| hsa00010 | Glycolysis   | 57      | 0.591389   | 2.361714 | 0.001623 | 0.008143 | 0.003836 | 2836 |
| hsa00260 | Glycine, se  | 35      | 0.664328   | 2.399917 | 0.001623 | 0.008143 | 0.003836 | 4036 |
| hsa00330 | Arginine ai  | 48      | 0.630963   | 2.429887 | 0.001623 | 0.008143 | 0.003836 | 4282 |
| hsa00982 | Drug meta    | 57      | 0.483445   | 1.93064  | 0.001623 | 0.008143 | 0.003836 | 4746 |
| hsa00071 | Fatty acid   | 42      | 0.682449   | 2.574924 | 0.001631 | 0.008143 | 0.003836 | 2836 |
| hsa00250 | Alanine, as  | 34      | 0.58333    | 2.097282 | 0.001634 | 0.008143 | 0.003836 | 4972 |
| hsa00270 | Cysteine ai  | 46      | 0.549838   | 2.100552 | 0.001634 | 0.008143 | 0.003836 | 4914 |
| hsa00280 | Valine, leu  | 46      | 0.76213    | 2.911573 | 0.001634 | 0.008143 | 0.003836 | 3058 |
| hsa00380 | Tryptophan   | 40      | 0.635627   | 2.367247 | 0.001634 | 0.008143 | 0.003836 | 3328 |
| hsa00830 | Retinol me   | 50      | 0.528714   | 2.053509 | 0.001634 | 0.008143 | 0.003836 | 4386 |
| hsa04976 | Bile secreti | 71      | 0.499468   | 2.089775 | 0.001634 | 0.008143 | 0.003836 | 3724 |
| hsa00561 | Glycerolipi  | 55      | 0.436571   | 1.728251 | 0.001637 | 0.008143 | 0.003836 | 2908 |
| hsa00980 | Metabolism   | 60      | 0.455679   | 1.832226 | 0.001637 | 0.008143 | 0.003836 | 3724 |
| hsa01212 | Fatty acid   | 55      | 0.578581   | 2.290422 | 0.001637 | 0.008143 | 0.003836 | 2655 |
| hsa04146 | Peroxisom    | 77      | 0.61642    | 2.614934 | 0.001639 | 0.008143 | 0.003836 | 4361 |
| hsa00480 | Glutathion   | 53      | 0.432425   | 1.698625 | 0.001642 | 0.008143 | 0.003836 | 4070 |
| hsa00620 | Pyruvate m   | 36      | 0.73282    | 2.656743 | 0.001642 | 0.008143 | 0.003836 | 1915 |
| hsa00190 | Oxidative p  | 98      | 0.621308   | 2.735771 | 0.00165  | 0.008143 | 0.003836 | 3232 |
| hsa00983 | Drug meta    | 69      | 0.428113   | 1.772981 | 0.00165  | 0.008143 | 0.003836 | 3803 |
| hsa05204 | Chemical c   | 69      | 0.432895   | 1.792785 | 0.00165  | 0.008143 | 0.003836 | 4569 |
| hsa01230 | Biosynthes   | 65      | 0.530593   | 2.168965 | 0.001653 | 0.008143 | 0.003836 | 3702 |
| hsa00350 | Tyrosine m   | 33      | 0.555028   | 1.974358 | 0.001656 | 0.008143 | 0.003836 | 4663 |
| hsa00020 | Citrate cyc  | 29      | 0.766057   | 2.654095 | 0.001661 | 0.008143 | 0.003836 | 2824 |
| hsa00630 | Glyoxylate   | 29      | 0.706501   | 2.447756 | 0.001661 | 0.008143 | 0.003836 | 3375 |
| hsa00640 | Propanoate   | 30      | 0.794009   | 2.769829 | 0.001664 | 0.008143 | 0.003836 | 2720 |
| hsa00410 | beta-Alani   | 28      | 0.662484   | 2.261554 | 0.001667 | 0.008143 | 0.003836 | 3135 |
| hsa03320 | PPAR signa   | 68      | 0.435837   | 1.789146 | 0.001669 | 0.008143 | 0.003836 | 2655 |
| hsa04260 | Cardiac m    | 68      | 0.439389   | 1.803726 | 0.001669 | 0.008143 | 0.003836 | 1102 |
| hsa00900 | Terpenoid    | 22      | 0.70478    | 2.280815 | 0.001692 | 0.008143 | 0.003836 | 4570 |
| hsa04966 | Collecting   | 27      | 0.586752   | 1.988947 | 0.001692 | 0.008143 | 0.003836 | 1593 |
| hsa00062 | Fatty acid   | 25      | 0.597268   | 1.985857 | 0.001701 | 0.008143 | 0.003836 | 3283 |
| hsa00053 | Ascorbate    | 23      | 0.701125   | 2.28669  | 0.001715 | 0.008143 | 0.003836 | 4074 |
| hsa00790 | Folate bios  | 23      | 0.615221   | 2.006518 | 0.001715 | 0.008143 | 0.003836 | 1866 |
| hsa00340 | Histidine m  | 21      | 0.687124   | 2.189629 | 0.001718 | 0.008143 | 0.003836 | 2836 |
| hsa00650 | Butanoate    | 24      | 0.802579   | 2.63302  | 0.001721 | 0.008143 | 0.003836 | 2593 |
| hsa00970 | Aminoacyl    | 24      | 0.608552   | 1.996476 | 0.001721 | 0.008143 | 0.003836 | 4450 |
| hsa00040 | Pentose ar   | 26      | 0.683261   | 2.282377 | 0.001727 | 0.008143 | 0.003836 | 4074 |
| hsa01210 | 2-Oxocarb    | 18      | 0.67843    | 2.084903 | 0.001745 | 0.008143 | 0.003836 | 2640 |
| hsa00061 | Fatty acid   | 16      | 0.643727   | 1.90813  | 0.001754 | 0.008143 | 0.003836 | 1627 |
| hsa00450 | Selenocorr   | 16      | 0.625435   | 1.853909 | 0.001754 | 0.008143 | 0.003836 | 4983 |
| hsa00130 | Ubiquinon    | 11      | 0.665495   | 1.75256  | 0.001812 | 0.008143 | 0.003836 | 1692 |
| hsa05310 | Asthma       | 23      | -0.69877   | -2.39533 | 0.002387 | 0.008143 | 0.003836 | 2835 |
| hsa00532 | Glycosamir   | 20      | -0.65693   | -2.16513 | 0.002392 | 0.008143 | 0.003836 | 4659 |

|          |               |     |          |          |          |          |          |      |
|----------|---------------|-----|----------|----------|----------|----------|----------|------|
| hsa04640 | Hematopo      | 91  | -0.57933 | -2.69626 | 0.0025   | 0.008143 | 0.003836 | 2654 |
| hsa04933 | AGE-RAGE      | 99  | -0.3763  | -1.78846 | 0.002513 | 0.008143 | 0.003836 | 4129 |
| hsa05142 | Chagas dis    | 97  | -0.42537 | -2.01083 | 0.002513 | 0.008143 | 0.003836 | 3029 |
| hsa05330 | Allograft re  | 33  | -0.67554 | -2.52578 | 0.002513 | 0.008143 | 0.003836 | 2833 |
| hsa04657 | IL-17 signa   | 86  | -0.4651  | -2.12941 | 0.002519 | 0.008143 | 0.003836 | 3656 |
| hsa04658 | Th1 and Th    | 86  | -0.55019 | -2.51898 | 0.002519 | 0.008143 | 0.003836 | 3982 |
| hsa05140 | Leishmania    | 74  | -0.63122 | -2.83112 | 0.002519 | 0.008143 | 0.003836 | 2833 |
| hsa05323 | Rheumatoi     | 90  | -0.47257 | -2.19632 | 0.002519 | 0.008143 | 0.003836 | 2833 |
| hsa04064 | NF-kappa      | 98  | -0.5306  | -2.51282 | 0.002525 | 0.008143 | 0.003836 | 2104 |
| hsa04620 | Toll-like re  | 98  | -0.46078 | -2.18215 | 0.002525 | 0.008143 | 0.003836 | 4321 |
| hsa04625 | C-type lect   | 98  | -0.41178 | -1.95007 | 0.002525 | 0.008143 | 0.003836 | 4043 |
| hsa05146 | Amoebiasis    | 98  | -0.43677 | -2.06844 | 0.002525 | 0.008143 | 0.003836 | 4129 |
| hsa05150 | Staphylocc    | 73  | -0.6058  | -2.70988 | 0.002525 | 0.008143 | 0.003836 | 3261 |
| hsa04662 | B cell rece   | 79  | -0.50666 | -2.29862 | 0.002532 | 0.008143 | 0.003836 | 4043 |
| hsa04659 | Th17 cell d   | 96  | -0.55373 | -2.60586 | 0.002538 | 0.008143 | 0.003836 | 3982 |
| hsa04660 | T cell rece   | 96  | -0.46881 | -2.20622 | 0.002538 | 0.008143 | 0.003836 | 2176 |
| hsa04610 | Compleme      | 77  | -0.42345 | -1.91509 | 0.002551 | 0.008143 | 0.003836 | 2368 |
| hsa04612 | Antigen pr    | 77  | -0.41272 | -1.86657 | 0.002551 | 0.008143 | 0.003836 | 2550 |
| hsa04061 | Viral prote   | 87  | -0.69586 | -3.18899 | 0.002558 | 0.008143 | 0.003836 | 3577 |
| hsa05235 | PD-L1 exp     | 87  | -0.44672 | -2.04724 | 0.002558 | 0.008143 | 0.003836 | 2858 |
| hsa05321 | Inflammat     | 55  | -0.60352 | -2.52145 | 0.002558 | 0.008143 | 0.003836 | 4477 |
| hsa04940 | Type I diab   | 41  | -0.57786 | -2.25072 | 0.002564 | 0.008143 | 0.003836 | 2833 |
| hsa05133 | Pertussis     | 71  | -0.55948 | -2.48163 | 0.002564 | 0.008143 | 0.003836 | 2581 |
| hsa05144 | Malaria       | 47  | -0.58845 | -2.37223 | 0.002564 | 0.008143 | 0.003836 | 2956 |
| hsa05332 | Graft-vers    | 41  | -0.6379  | -2.48455 | 0.002564 | 0.008143 | 0.003836 | 4490 |
| hsa05340 | Primary im    | 34  | -0.76651 | -2.86824 | 0.002564 | 0.008143 | 0.003836 | 2319 |
| hsa04672 | Intestinal ir | 42  | -0.66909 | -2.62229 | 0.002571 | 0.008143 | 0.003836 | 3982 |
| hsa05416 | Viral myoc    | 58  | -0.52835 | -2.23202 | 0.002571 | 0.008143 | 0.003836 | 3106 |
| hsa04670 | Leukocyte     | 105 | -0.39572 | -1.88854 | 0.002584 | 0.008143 | 0.003836 | 3250 |
| hsa05134 | Legionello    | 57  | -0.40362 | -1.69492 | 0.002591 | 0.008143 | 0.003836 | 3029 |
| hsa05322 | Systemic lu   | 48  | -0.6647  | -2.68537 | 0.002591 | 0.008143 | 0.003836 | 3982 |
| hsa05320 | Autoimmu      | 44  | -0.63699 | -2.51753 | 0.002597 | 0.008143 | 0.003836 | 4490 |
| hsa05162 | Measles       | 132 | -0.44211 | -2.19164 | 0.002604 | 0.008143 | 0.003836 | 4604 |
| hsa04623 | Cytosolic I   | 56  | -0.43351 | -1.81421 | 0.002611 | 0.008143 | 0.003836 | 4284 |
| hsa04630 | JAK-STAT      | 139 | -0.37938 | -1.90376 | 0.002625 | 0.008143 | 0.003836 | 2905 |
| hsa05135 | Yersinia inf  | 130 | -0.38528 | -1.90397 | 0.002625 | 0.008143 | 0.003836 | 2176 |
| hsa04650 | Natural kill  | 119 | -0.4846  | -2.36414 | 0.002632 | 0.008143 | 0.003836 | 4521 |
| hsa04514 | Cell adhesi   | 136 | -0.48062 | -2.3977  | 0.002639 | 0.008143 | 0.003836 | 2683 |
| hsa04210 | Apoptosis     | 129 | -0.35008 | -1.72214 | 0.00266  | 0.008143 | 0.003836 | 4124 |
| hsa04668 | TNF signal    | 108 | -0.53497 | -2.55719 | 0.00266  | 0.008143 | 0.003836 | 4124 |
| hsa05145 | Toxoplasma    | 108 | -0.38942 | -1.86141 | 0.00266  | 0.008143 | 0.003836 | 3042 |
| hsa04145 | Phagosome     | 144 | -0.37088 | -1.8601  | 0.002667 | 0.008143 | 0.003836 | 2833 |
| hsa04380 | Osteoclast    | 122 | -0.53902 | -2.62655 | 0.002688 | 0.008143 | 0.003836 | 4043 |
| hsa04611 | Platelet act  | 114 | -0.35258 | -1.70831 | 0.002703 | 0.008143 | 0.003836 | 4217 |
| hsa05161 | Hepatitis B   | 157 | -0.40529 | -2.06719 | 0.002703 | 0.008143 | 0.003836 | 4321 |
| hsa05152 | Tuberculos    | 171 | -0.3932  | -2.02278 | 0.002732 | 0.008143 | 0.003836 | 2870 |
| hsa05202 | Transcripti   | 158 | -0.3643  | -1.85831 | 0.002732 | 0.008143 | 0.003836 | 3824 |
| hsa04621 | NOD-like r    | 161 | -0.40936 | -2.1024  | 0.002778 | 0.008143 | 0.003836 | 4604 |
| hsa05203 | Viral carcin  | 161 | -0.35034 | -1.79924 | 0.002778 | 0.008143 | 0.003836 | 4043 |
| hsa05164 | Influenza A   | 162 | -0.45071 | -2.31327 | 0.002793 | 0.008143 | 0.003836 | 4604 |
| hsa05206 | MicroRNA      | 163 | -0.33326 | -1.70467 | 0.002793 | 0.008143 | 0.003836 | 4176 |
| hsa04062 | Chemokine     | 177 | -0.48329 | -2.49036 | 0.002833 | 0.008143 | 0.003836 | 3454 |
| hsa05167 | Kaposi sar    | 175 | -0.37843 | -1.94959 | 0.002833 | 0.008143 | 0.003836 | 4043 |
| hsa05169 | Epstein-Ba    | 194 | -0.44505 | -2.32447 | 0.002865 | 0.008143 | 0.003836 | 4321 |
| hsa05171 | Coronavir     | 195 | -0.50253 | -2.62665 | 0.002865 | 0.008143 | 0.003836 | 4321 |
| hsa05166 | Human T-c     | 211 | -0.44099 | -2.35038 | 0.002882 | 0.008143 | 0.003836 | 4191 |
| hsa05163 | Human cyt     | 210 | -0.33152 | -1.76307 | 0.00289  | 0.008143 | 0.003836 | 4490 |
| hsa05170 | Human im      | 191 | -0.32016 | -1.66805 | 0.00289  | 0.008143 | 0.003836 | 4359 |

|          |              |     |          |          |          |          |          |      |
|----------|--------------|-----|----------|----------|----------|----------|----------|------|
| hsa05132 | Salmonella   | 244 | -0.3184  | -1.72742 | 0.002994 | 0.008363 | 0.003939 | 3444 |
| hsa04060 | Cytokine-c   | 249 | -0.50624 | -2.73626 | 0.003096 | 0.008573 | 0.004039 | 3577 |
| hsa04010 | MAPK sign    | 274 | -0.28457 | -1.55855 | 0.003125 | 0.008581 | 0.004042 | 4267 |
| hsa04150 | mTOR sigr    | 146 | 0.334328 | 1.559727 | 0.00321  | 0.008741 | 0.004118 | 4598 |
| hsa04973 | Carbohydr    | 38  | 0.464181 | 1.699776 | 0.003284 | 0.008806 | 0.004148 | 1771 |
| hsa00760 | Nicotinate   | 31  | 0.511954 | 1.794551 | 0.003295 | 0.008806 | 0.004148 | 4101 |
| hsa04130 | SNARE inte   | 30  | 0.521137 | 1.817938 | 0.003328 | 0.008806 | 0.004148 | 2190 |
| hsa01040 | Biosynthes   | 25  | 0.54786  | 1.82158  | 0.003401 | 0.008806 | 0.004148 | 3283 |
| hsa00220 | Arginine b   | 20  | 0.598656 | 1.88413  | 0.003425 | 0.008806 | 0.004148 | 4357 |
| hsa00770 | Pantotheni   | 20  | 0.609998 | 1.919825 | 0.003425 | 0.008806 | 0.004148 | 3245 |
| hsa04964 | Proximal tu  | 20  | 0.610665 | 1.921925 | 0.003425 | 0.008806 | 0.004148 | 5384 |
| hsa05168 | Herpes sim   | 427 | -0.26018 | -1.49432 | 0.003472 | 0.008858 | 0.004173 | 4614 |
| hsa05200 | Pathways i   | 492 | -0.26414 | -1.54082 | 0.003846 | 0.009736 | 0.004586 | 2905 |
| hsa00140 | Steroid hor  | 50  | 0.430555 | 1.672265 | 0.004902 | 0.012217 | 0.005755 | 4663 |
| hsa00860 | Porphyrin i  | 34  | 0.503666 | 1.810861 | 0.004902 | 0.012217 | 0.005755 | 5555 |
| hsa04977 | Vitamin dig  | 20  | 0.553202 | 1.741076 | 0.005137 | 0.012631 | 0.00595  | 1726 |
| hsa03430 | Mismatch i   | 23  | 0.522505 | 1.704129 | 0.005146 | 0.012631 | 0.00595  | 2322 |
| hsa05160 | Hepatitis C  | 144 | -0.30988 | -1.55414 | 0.005333 | 0.012992 | 0.006121 | 4550 |
| hsa04360 | Axon guidi   | 173 | -0.26974 | -1.38987 | 0.00551  | 0.013322 | 0.006276 | 4082 |
| hsa05130 | Pathogenic   | 184 | -0.32396 | -1.68287 | 0.005682 | 0.013553 | 0.006385 | 3581 |
| hsa04510 | Focal adhe   | 196 | -0.26906 | -1.41005 | 0.005714 | 0.013553 | 0.006385 | 3374 |
| hsa04015 | Rap1 signa   | 194 | -0.2801  | -1.46296 | 0.005731 | 0.013553 | 0.006385 | 2981 |
| hsa05205 | Proteoglyc   | 199 | -0.26956 | -1.41484 | 0.005814 | 0.01365  | 0.00643  | 2981 |
| hsa04910 | Insulin sigr | 133 | 0.315188 | 1.454589 | 0.006525 | 0.01521  | 0.007165 | 5126 |
| hsa00360 | Phenylalan   | 17  | 0.574231 | 1.739019 | 0.00692  | 0.016016 | 0.007545 | 4569 |
| hsa04664 | Fc epsilon   | 63  | -0.38016 | -1.64153 | 0.0075   | 0.017208 | 0.008106 | 2176 |
| hsa05221 | Acute mye    | 65  | -0.39944 | -1.7389  | 0.007557 | 0.017208 | 0.008106 | 2156 |
| hsa04666 | Fc gamma     | 95  | -0.34185 | -1.6035  | 0.007595 | 0.017208 | 0.008106 | 2215 |
| hsa04217 | Necroptos    | 124 | -0.31047 | -1.517   | 0.008108 | 0.018243 | 0.008594 | 3573 |
| hsa05131 | Shigellosis  | 209 | -0.25501 | -1.3566  | 0.008475 | 0.018936 | 0.008921 | 2185 |
| hsa00500 | Starch and   | 32  | 0.468059 | 1.654066 | 0.011551 | 0.025634 | 0.012076 | 3245 |
| hsa05220 | Chronic my   | 76  | -0.32416 | -1.45955 | 0.012658 | 0.0279   | 0.013143 | 2156 |
| hsa00730 | Thiamine r   | 14  | 0.595335 | 1.694462 | 0.014159 | 0.030997 | 0.014602 | 2325 |
| hsa04218 | Cellular sei | 148 | -0.28837 | -1.46357 | 0.015464 | 0.033626 | 0.015841 | 4359 |
| hsa03013 | RNA transp   | 152 | 0.29946  | 1.405613 | 0.015924 | 0.034395 | 0.016203 | 6074 |
| hsa05222 | Small cell l | 90  | -0.30794 | -1.43118 | 0.017632 | 0.037833 | 0.017823 | 4550 |
| hsa04922 | Glucagon s   | 96  | 0.32495  | 1.426871 | 0.018092 | 0.038565 | 0.018167 | 2485 |
| hsa05165 | Human pa     | 316 | -0.22651 | -1.26373 | 0.019108 | 0.040465 | 0.019062 | 3374 |
| hsa04512 | ECM-recep    | 82  | -0.3159  | -1.43592 | 0.020408 | 0.042937 | 0.020227 | 3607 |

# leading\_edcore\_enrichment

tags=32%, 1349/7386/4717/2911/54205/4720/29796/6390/9377/4706/4722/1537/292/10105/291/  
tags=36%, 1349/7386/4717/54205/4720/29796/4023/6390/9377/4706/4722/1537/292/10105/291/  
tags=34%, 1349/7386/4717/54205/4720/29796/6390/9377/4706/4722/1537/6389/4702/65018/471  
tags=38%, 1349/7386/4717/10891/54205/4720/29796/6390/9377/4706/4722/3766/1537/292/1010  
tags=36%, 1349/7386/4717/54205/4720/29796/6390/9377/4706/4722/1537/292/10105/291/6389/  
tags=31%, 1349/7386/4717/54205/4720/29796/6390/9377/4706/4722/1537/292/10105/291/6389/  
tags=36%, 1349/7386/4717/10891/4720/29796/493753/6390/9377/4706/4722/1537/6389/5563/47  
tags=24%, 10891/5563/5862/2538/51422/1994/7248/32/5208/3643/55844/5468/6009/2203/3156/  
tags=61%, 2805/38/3418/414328/8801/6390/84693/26007/8803/8802/128/6389/26275/1738/275/  
tags=41%, 2911/54205/292/10105/291/10939/1600/3708/115209/5701/3709/8678/5717/7416/570  
tags=53%, 2235/4338/51805/217/84274/9054/5805/204/1738/8566/210/53354/51004/54995/1101  
tags=41%, 1349/7386/4717/54205/4720/29796/6390/9377/4706/4722/1537/6389/5563/4702/4715  
tags=29%, 4717/2911/4720/4706/4722/2788/4702/3760/4715/2560/3708/10681/3709/4705/4714/  
tags=46%, 38/217/3033/1738/501/224/55526/51166/2639/1892/1962/123688/10157/39/219/9869  
tags=51%, 3945/217/128/1738/2538/501/1737/224/5162/84532/130589/5230/2597/2203/2023/51  
tags=74%, 1491/9380/1738/23464/275/501/29958/4129/6470/189/2653/29968/4128/1610/1757/6  
tags=67%, 2805/217/501/4129/224/6611/84735/112849/8974/5625/112483/4953/4942/4128/1610  
tags=53%, 128/4129/2947/1576/2948/9446/2940/2330/4128/2329/130/4259/2938/54576/2941/54  
tags=67%, 38/34/36/10455/217/33/3033/128/10449/501/224/1632/3032/2639/2181/2180/30/1892  
tags=71%, 2805/339983/2346/7915/2746/189/2875/2747/443/18/2571/8528/56954/445/64902/54  
tags=67%, 2805/3945/1491/55256/4191/6611/27430/58478/4144/29968/191/23743/51074/4507/4  
tags=78%, 5019/56922/549/38/34/36/217/84693/3712/27034/594/11112/3033/26275/1738/10449  
tags=68%, 38/217/3033/1738/501/4129/224/55526/1644/51166/2639/8942/847/4128/1892/1962/  
tags=56%, 128/1551/9249/1576/216/145226/8228/157506/10901/317749/51109/130/56603/54576  
tags=45%, 760/358/476/481/1576/9429/1244/3781/8431/10864/3156/10998/107/6523/5243/5457  
tags=40%, 4023/217/26007/501/80339/224/2710/56894/129642/219/1607/116255/10327/253558/  
tags=43%, 873/128/27294/2947/1576/2948/9446/2940/22977/130/4259/2938/54576/8574/2941/5  
tags=49%, 38/34/36/33/3033/10449/54995/84869/3032/2181/2180/6342/30/1892/27349/1962/81  
tags=70%, 3418/283927/5191/10455/2053/5827/3155/55825/3417/83594/8309/6647/189/5189/21  
tags=51%, 3418/3417/124975/2947/6611/79017/2948/9446/4953/2940/26873/2729/4259/2938/62  
tags=64%, 38/3945/217/9380/1738/501/2271/1737/4191/224/3029/10873/5162/32/2739/84532/1  
tags=54%, 1349/7386/4717/4720/29796/6390/9377/4706/4722/1537/6389/245973/4702/4715/529  
tags=48%, 151531/2947/83549/1576/2948/9446/2940/7172/9/4259/2938/7372/6240/54576/2941/  
tags=48%, 873/128/1551/2947/1576/2948/9446/2940/9/130/4259/2938/54576/2941/54577/54600  
tags=52%, 2805/3418/1491/3420/3417/6470/2875/27430/4144/29968/50/95/5230/2597/729020/2  
tags=61%, 7306/2805/128/4129/1644/4282/4128/130/81889/3081/2184/220074/5409/316/1621/2  
tags=79%, 3418/8801/6390/8803/8802/6389/1738/3420/2271/1737/3417/4191/5162/4967/50/639  
tags=76%, 38/84693/9380/1738/275/4191/6470/189/5096/84532/2653/50/847/51179/4190/39/48,  
tags=80%, 38/3945/8801/84693/8803/594/8802/26275/1738/79611/1629/32/5096/84532/55862/4  
tags=61%, 217/26275/501/224/84735/4329/1892/18/2571/1962/51/219/3030/8310/223/51733/18  
tags=34%, 34/4023/33/10873/8309/2710/2181/2180/6342/5468/30/1962/81616/51/10998/11001/  
tags=19%, 1349/7386/783/29796/9377/1537/476/1327/7385/481/1351/1329/7384  
tags=82%, 38/51449/3422/57107/3156/39/79947/23463/4598/2224/116150/2342/2339/10654/235  
tags=44%, 1188/245973/760/6521/529/245972/50617/127124/523/51382/526/528  
tags=56%, 3033/10449/3032/122970/11332/1892/641371/10965/79993/51102/117145/3030/5114  
tags=83%, 217/501/224/55586/9365/219/10327/54576/54577/54600/223/54578/54575/54659/545  
tags=43%, 873/4338/5805/249/84105/10243/1719/5053/8836/6697  
tags=62%, 217/501/4129/224/84735/443/138199/4128/219/144193/26/10841/223  
tags=79%, 5019/38/622/79944/3033/3155/56898/65985/6296/7915/1892/18/2571/1962/39/3030/  
tags=71%, 5188/10667/51091/79731/55699/124454/55157/23438/80222/23395/57038/55278/219  
tags=77%, 51181/27294/51084/6652/9942/729020/9365/6120/10327/54576/54577/54600/54578/  
tags=61%, 2805/3418/3420/3417/2875/51166/50/95/162417/48/3419  
tags=56%, 54995/32/84869/2181/2180/27349/81616/7923/51102  
tags=69%, 22929/1491/51091/22928/4548/10587/51540/883/56267/118672/92935  
tags=36%, 51805/84274/51004/10229  
tags=83%, 7124/3125/3127/2205/3118/3117/3126/3123/6356/3113/958/3119/3115/2207/959/310  
tags=70%, 26229/126792/29940/337876/64132/113189/55501/55790/51363/22856/56548/64131/

tags=53%, 910/3559/3570/4254/3117/3126/3123/1604/929/913/947/3113/3690/3552/1438/3553/!  
tags=40%, 7043/5331/5293/10000/4087/8503/4772/3569/6777/2308/5333/6774/7040/5054/1284/  
tags=39%, 841/2774/7040/8772/148022/3460/5054/355/5603/5594/7042/4792/5970/5332/2769/2  
tags=79%, 356/3593/7124/3125/3127/3118/3117/3126/3123/355/3134/3002/3113/5551/3133/942  
tags=47%, 4314/3569/7188/6354/8061/841/1673/7187/3627/8772/2921/7184/4318/5598/6356/56  
tags=56%, 3125/3127/4772/30009/5534/5530/6777/55534/3118/3559/3117/3126/3123/3460/3595  
tags=53%, 3118/7040/3117/3126/3123/3460/5603/5594/7042/4792/5970/6772/1536/3689/3113/3  
tags=48%, 3118/7040/2921/51561/3117/3126/3123/1493/7042/3689/3113/3606/3552/4050/8992/  
tags=38%, 4792/5335/5970/929/6351/4050/9020/3553/8792/958/597/695/6363/5743/4067/6357/!  
tags=49%, 7124/3452/3439/3447/7100/5293/10000/3661/1513/8503/3569/3448/3654/4283/841/7  
tags=46%, 5293/10000/338339/4193/1540/8503/4772/4791/5534/3569/5530/6367/841/868/51561  
tags=47%, 22798/3593/7124/7043/5331/5293/3911/8503/735/3569/338382/7414/10319/2774/391  
tags=56%, 720/721/1673/3118/5724/3117/3126/125115/2266/3123/3689/3859/3113/2359/3872/1  
tags=46%, 5293/10000/353514/8503/4772/5534/5530/11027/971/10990/11006/5594/4792/5970/9  
tags=59%, 3125/3127/4087/4772/30009/5534/3569/5530/6777/6774/3118/7040/3559/51561/3570  
tags=32%, 5603/1493/5594/5788/4792/5335/5970/29851/9020/3845/940/1326/925/5063/916/479  
tags=40%, 2266/2161/2243/5054/7056/1604/3689/2244/1675/10878/716/629/3687/11326/10877/  
tags=36%, 3824/3117/3126/3123/3134/1520/10437/3113/3821/3822/972/3133/6891/3107/4261/3  
tags=67%, 3569/1435/1233/6370/6355/4283/6354/8795/7852/6367/3627/2921/29949/8764/3559/  
tags=38%, 6774/116071/148022/1460/3460/4215/10538/5603/5594/4792/29126/5335/5970/6772/  
tags=75%, 3593/7124/7100/7043/3125/3127/4087/4772/30009/3569/6774/3118/7040/51561/3117  
tags=54%, 3118/3117/3126/3123/355/3134/5799/3002/3113/3552/5551/3553/3133/942/3107/940  
tags=48%, 51561/148022/1072/5603/5594/5970/929/3689/114548/3552/836/716/3553/2771/3659  
tags=55%, 2995/7040/5175/4233/1311/7042/975/3689/3606/3553/958/7097/6403/6401/22914/63  
tags=71%, 356/7124/115653/3125/3127/3569/3118/3824/3117/3126/3123/355/3134/3002/3113/3  
tags=65%, 64421/5788/973/29851/6891/930/958/4261/925/695/916/84876/959/920/100/7535/35.  
tags=67%, 3125/3127/3569/6370/7852/3118/7040/3117/3126/3123/56477/3113/29851/5284/9020  
tags=53%, 8672/841/637/3118/3117/3126/3123/857/1525/3134/1604/3689/3113/836/5551/3133/!  
tags=37%, 5906/7414/7852/1500/6494/5175/4318/58494/5603/5335/10627/1536/83700/3689/426  
tags=40%, 841/1937/58484/2921/4792/5970/929/81876/3689/3606/836/3553/7097/834/317/3310  
tags=71%, 3125/3127/735/2215/720/721/733/3118/3117/3126/3123/3113/1511/716/942/958/940.  
tags=70%, 356/3452/3439/3447/1081/3125/3127/3448/3118/7253/3117/3126/3123/355/3134/149  
tags=53%, 51135/1019/1965/51209/356/3593/3452/3439/3447/5293/10000/898/3661/8503/23586  
tags=46%, 3452/3439/3447/51082/3661/23586/3569/3448/10622/3627/84265/90865/103/4792/59  
tags=31%, 5156/6774/29949/3559/51561/3570/5159/5154/5771/3460/85480/3595/6778/6772/677  
tags=28%, 5603/5594/4792/5335/5970/114548/3606/2776/9815/3553/7456/925/834/6347/10094/  
tags=50%, 117157/25759/80328/6464/356/7124/3452/3439/3447/5293/115653/8503/4772/51744/  
tags=40%, 5175/57863/3117/3126/3123/58494/23114/3134/1493/5788/29126/22829/947/83700/3  
tags=42%, 4217/5293/10000/1513/8503/71/142/472/578/8739/113457/112714/8795/841/637/727  
tags=52%, 4217/8986/5293/10000/8503/9252/4314/3569/7188/1435/841/90993/7187/3627/8772/  
tags=36%, 10319/841/6774/3914/3118/7040/3117/3126/3123/3460/5603/5594/3915/7042/4792/5  
tags=37%, 3118/7278/5869/6441/4360/4481/3117/3126/3123/1311/3134/1520/929/1536/3689/31  
tags=53%, 5293/10000/1540/1513/353514/8503/4772/4791/5534/5530/2215/1435/8061/11027/70  
tags=38%, 5742/5908/5331/5293/10000/5592/8503/71/9138/10672/7094/5906/5321/5023/2266/1  
tags=42%, 356/6554/7124/3452/3439/3447/4214/7043/5293/10000/898/3661/8503/4772/23586/3  
tags=34%, 637/3118/7040/8772/5869/51561/4360/3117/3126/3123/7096/3460/5603/817/5594/70  
tags=39%, 8842/5546/5090/4314/472/3569/84444/1031/578/2308/6929/2005/6692/2078/2313/67  
tags=48%, 51135/79792/64170/115361/22900/7158/7124/3452/5585/3439/3447/5331/3661/7295/  
tags=37%, 5293/898/4193/3661/8503/7531/4791/7188/1233/578/5315/6777/5610/841/90993/718  
tags=54%, 51135/1019/1965/356/3593/7124/3836/3452/9230/3439/3447/5293/10000/3661/3125/  
tags=39%, 54541/4854/5728/5293/11186/898/4193/4325/8503/6541/659/9252/7329/995/472/672  
tags=44%, 1233/6370/57580/6355/6777/4283/6354/5906/7852/408/6367/10663/7074/6774/3627/  
tags=41%, 5293/10000/3661/59345/8503/4772/2247/131450/5534/3569/3448/5530/1233/578/575  
tags=49%, 7124/6502/3452/3439/3447/5293/10000/898/4193/3661/3125/3127/8503/5713/4791/2  
tags=52%, 7124/3452/3439/3447/6159/6146/5293/3661/8503/6868/4312/6227/735/23586/4314/3  
tags=47%, 4214/5728/7043/5293/10000/898/3125/3127/4087/8503/4772/4791/64784/4487/5534/  
tags=41%, 356/3579/108/1230/7124/3452/6667/3439/3447/5331/5293/9826/10000/4193/3661/59  
tags=41%, 8945/7124/9133/3452/3439/3447/140564/5293/10000/3661/59345/8503/4772/5534/99

tags=31%, 578/3654/89953/113457/112714/338382/8795/3800/841/6188/8655/58484/127829/727  
tags=46%, 3569/3448/1435/1233/6370/6355/1442/4283/6354/8795/7852/3557/6367/3625/10663/  
tags=35%, 2322/2249/5908/4214/7043/4217/8986/10000/5923/3164/409/4772/2247/4791/9252/5  
tags=34%, 58528/5563/245973/8649/1147/529/7248/57600/10542/3643/127124/523/51382/2733/  
tags=32%, 6518/2538/476/481/8972/2542/276/277/278/279/6523/280  
tags=58%, 23410/23530/83594/23409/4860/349565/133686/64802/23475/683/93100/54981/316/!  
tags=37%, 53407/9570/10490/6845/6809/9341/9527/8417/10652/8773/10282  
tags=52%, 6342/122970/30/11332/51/641371/10965/79993/3295/79966/8310/51144/51495  
tags=60%, 2805/2746/2875/2747/95/162417/384/445/435/2806/84706/2744  
tags=50%, 217/53354/224/79717/80347/219/79646/51733/1807/5169  
tags=70%, 760/358/476/481/2746/2747/4190/5106/5105/486/2744/1468/27165/482  
tags=32%, 148268/51135/55769/1965/64170/356/7710/3593/349075/92595/29992/7124/3452/34:  
tags=25%, 5156/5228/637/7187/6774/7483/3914/8324/7040/7428/2768/8772/80326/57121/3559/  
tags=48%, 1551/1576/1586/7923/3291/79154/54576/220074/54577/54600/3294/374875/54578/5:  
tags=68%, 2235/210/326625/124454/7389/54576/54577/54600/644/54578/54575/54659/54579/2:  
tags=35%, 25974/2346/686/9963/113235/5948/8029  
tags=35%, 5395/4437/6119/5981/10714/5985/2956/4292  
tags=39%, 1019/1965/356/7124/3452/3439/3447/5293/10000/3661/6041/91543/8503/7531/10197  
tags=34%, 56963/5293/1948/8503/64221/6586/5361/659/2048/5534/85464/2044/5530/91653/747  
tags=35%, 8976/3569/578/3654/4644/10672/113457/112714/8795/8440/841/6188/5062/10163/72  
tags=27%, 3371/8516/7094/5906/7414/3611/131873/10319/5062/858/5156/5228/3914/8515/5649  
tags=28%, 7074/5156/5228/1500/6494/10636/57121/57568/4233/5159/4254/5154/196883/5603/5  
tags=27%, 7074/858/6774/7483/8324/7040/3339/80326/7078/4233/4318/355/857/5603/817/5594  
tags=35%, 10891/5563/2538/51422/7248/32/801/3643/5573/8835/9470/6009/1399/2203/6720/81  
tags=59%, 2805/4129/1644/4282/4128/5053/2806/10249/3242/221  
tags=27%, 5603/5594/5335/3845/8605/241/240/3635/695/4067/2207/7409/9846/27040/3937/220  
tags=26%, 5594/862/5970/929/6776/3845/8900/11040/597/890/2209/3684/6932/1436/5371/1848  
tags=27%, 1072/5594/5788/5335/7408/8605/3635/2209/4067/4082/3055/10094/2212/653361/557  
tags=40%, 7124/3452/3439/3447/1540/91782/142/7188/3448/29082/6777/5321/5610/8795/841/5  
tags=21%, 3099/5603/5594/4792/5335/5970/929/10627/9181/5332/837/7322/114548/3606/10398  
tags=41%, 2538/8972/2632/276/277/278/279/280/5236/57733/178/80201/5169  
tags=32%, 7043/5293/10000/4193/8503/578/6777/7040/5594/7042/4792/5970/6776/3845/399694  
tags=43%, 9054/204/52/84284/249/205  
tags=36%, 8945/2305/9133/5728/7043/5293/10000/898/4193/4087/8503/4772/5534/472/3569/55  
tags=45%, 26999/59343/11102/10284/9470/7341/65110/9939/10419/6396/2332/8891/1977/6510:  
tags=39%, 1019/22798/6502/5728/5293/10000/898/3911/8503/3685/7188/578/10319/7187/3914/  
tags=21%, 3945/10891/5563/2642/2538/51422/3708/3709/5162/32/801/2203/5160/1387/5213/81  
tags=24%, 3371/5315/8516/2308/5610/7474/55534/5529/131873/10319/841/3955/90993/7187/74  
tags=35%, 3685/1758/3371/8516/131873/10319/3914/3339/8515/9900/5649/1292/9899/1311/714



930/3119/952/3563/3115/1441/2209/925/2323/3574/916/960/951/931/917/3554/3108/3678/3109,  
'7056/5603/5594/7042/5335/5970/6772/6776/1536/5332/3552/836/3845/581/3553/6401/6347/431  
775/2776/3553/2771/6348/6349/414062/7097/916/6347/919/811/6352/917/713/915/7132/714/23  
/958/3107/940/3119/3115/3105/959/3108/3109/3112  
03/5594/4792/5970/2354/836/3553/9641/6279/5743/6347/3727/23765/6374/6364/10758/2353/62  
i/5603/5594/6778/4792/5335/5970/6772/6776/3113/9794/3594/3119/3560/3115/916/4794/919/91  
552/9103/3553/3119/3115/2209/7097/5743/4688/2212/653361/3108/5579/3109/5777/3684/3112/  
'3553/942/8792/940/3119/3115/6348/6349/414062/7097/6347/6352/3108/3109/8600/3683/10673/  
959/3554/5579/5971/8600/7535/10673/3932/27040/7132/7185/6366/23643/4615/3383/7128/7412  
187/3663/3627/8772/148022/7096/5603/5594/4792/5970/6772/6373/929/6351/3553/942/958/132  
./5603/5594/4792/5970/6772/114548/64581/9020/3845/3710/4046/3553/3659/1960/9641/5743/26  
./4/733/7040/2921/5869/910/1284/3915/7042/5970/929/913/3689/5332/2769/2776/836/3315/1511  
675/25984/716/9103/3119/629/3115/2209/6403/2212/3108/728/3109/713/3684/3683/6404/3112/  
)75/973/11024/3845/10859/930/3635/695/10288/4067/4794/11025/5579/7409/5777/4773/2213/23  
)3117/3126/3123/3460/5603/5594/6778/4792/5335/5970/6772/6776/3572/3113/3594/3553/3119/  
4/919/959/917/7409/920/7535/5777/915/3932/27040/3937/3702/4773/2353/3725  
'2/1191/3078/728/713/3684/5329/3075/3080/714/715/717/718/7450/729/710  
119/3115/925/3105/567/3310/811/5721/3108/3109/920/6890/3112  
'3570/6356/56477/6373/6359/6351/3572/1524/8809/10563/3606/6362/5197/3560/6846/6348/6348  
'3845/940/55509/7097/3091/916/4794/919/917/920/7535/5777/915/3932/27040/4773/2353/4615/  
'/3126/3123/3460/3595/6778/7042/5970/6772/3113/8809/3606/3552/3594/64127/3553/3119/3115  
/3119/3115/3105/3108/3109/3112  
)834/3394/10392/3678/713/3684/6374/714/2353/715/717/23643/4615/718/3725/3576/29108/710  
47/959/3082/3683/3820/7058/4615/3383/7412/3576/2532  
552/3821/5551/3553/3133/942/3107/940/3119/3115/3105/3108/3109/3112  
43/915/3718/3932/6890/3575  
)942/958/940/3119/3115/959/3108/3109/10673/3601/3112/3676/608  
942/958/3107/940/3119/3115/3105/959/3108/60/3109/3683/3112/3383/5880  
)7/4478/7408/10398/2771/1365/1364/4688/4313/653361/60/5579/7409/399/3684/3683/3702/3676  
/3684/4615/718/3576/29108/2920/2919  
/3119/3115/2209/2903/2212/959/3108/3109/713/6737/3112/714/715/717/718/729/87  
3/3002/3113/5551/3133/942/958/3107/940/3119/3115/3105/959/3108/3109/3112  
)3569/3448/578/3654/6777/5610/841/868/637/7187/6774/4940/8772/3559/103/9451/1460/355/4  
)70/6351/3606/11277/3553/9641/834/6352/11035/9447/3665/29108  
'6/3572/1438/3594/3560/3563/10401/1441/338376/9180/3574/9466/10379/3976/5777/3718/5061  
2212/60/3678/7409/920/7535/3932/27040/7454/3937/9844/4773/3676/2353/10095/4615/3725/10  
'5534/3448/5530/2215/3823/8795/3384/637/3824/4277/3460/355/5594/4068/5335/3002/3689/836  
)689/4267/3113/29851/57689/9019/80380/3133/942/958/3107/940/3119/3115/925/1365/201633/3  
)8/8772/9451/355/5594/4792/1520/5970/3002/332/9020/836/3845/3710/1509/581/5551/10376/53  
'2921/4318/355/5603/5594/4792/5970/4323/8809/9020/836/197259/64127/3553/1326/3659/5743/  
970/6772/3113/2775/836/2771/958/4261/3119/240/3115/7097/1234/3310/959/3108/3109/3112/7  
13/3690/64581/203068/8992/23480/9103/10376/84617/3133/6891/3107/3119/3115/2209/7097/9  
)40/126014/10326/10990/11006/3460/5603/5594/7042/4792/5970/6772/11024/54209/2354/3690/  
96883/2243/5603/5594/10627/5332/2244/7408/3690/2776/8605/3710/2771/695/4067/64805/848/  
569/3448/3654/6777/841/90993/637/7187/6774/7040/3339/8772/148022/4318/355/5603/5594/67  
42/1520/5970/6772/929/3689/3113/3606/3552/64581/836/4046/1509/581/9103/64127/972/3553/  
56/4233/25942/2115/4318/5154/8464/5081/862/5970/929/3002/4297/604/8900/5079/64919/581/  
'6041/7531/4210/3569/7188/3448/5027/10628/841/55072/1673/58484/7187/4940/8772/2633/292  
7/6774/9519/23352/3134/27044/5594/4792/5970/6776/3572/836/3845/8900/5925/581/3133/5366  
'3127/6041/91543/8503/71/8766/23586/3569/3448/578/5610/8795/841/637/7187/4940/3118/3627  
/578/3371/1786/3162/5156/6774/7078/4233/5159/4318/5154/5598/7148/5594/7042/9839/5335/2  
'2921/196883/6356/5594/4792/56477/5335/5970/6772/6373/6359/6351/2782/5332/1524/10563/27  
)80/5610/841/637/7187/6774/8772/2921/148022/4277/355/5603/3134/5594/4792/5335/5970/677  
3586/3569/7188/3448/578/3654/11047/5610/841/637/7187/6774/4940/3118/3627/8772/25942/31  
569/3448/3654/6134/23521/720/721/5610/6138/6188/2162/6158/7187/6774/4940/733/3627/103/  
'472/3569/1031/5530/6777/7094/8061/11200/90993/6929/2005/3118/7040/701/996/9519/3559/31  
345/8503/4772/9138/5534/3685/3569/7188/3448/5530/578/10672/7852/841/90993/5156/637/677  
)5/472/7188/3448/200315/5530/578/3654/7852/841/5062/637/85363/8772/891/3985/355/1072/56



78/8772/5869/1639/7184/3798/64837/5603/5594/5788/4792/5970/929/10627/6993/837/23207/11.  
'94/9966/8784/8742/3627/7040/10148/2921/29949/8764/90865/3559/51561/3570/130399/6356/34  
534/2872/5530/1435/3654/9064/59285/5906/5321/408/775/5062/5156/2005/5228/7040/1843/276  
J/220441/9470/6009/526/528/55437/10641/8140/8322/6396/79726/51719/5170/1977/79109/9663

5169/554235/56953/4907/23408

39/3447/10224/147948/7700/146540/162993/148156/5293/121274/58500/10000/3661/3125/3127/  
'64399/51561/4233/3570/5159/7184/4254/4318/2949/5154/1909/196883/3460/355/3595/1284/817  
1144/54575/54659/54579/6716/54658/54657/8644/54490/1585/1312  
390/54658/54657/3163/54490/7390/3145/645/211/79799

'/23586/3448/578/5610/949/841/637/7187/6774/4940/3627/8772/148022/9451/355/5594/4792/59  
'4/7852/3611/8440/5062/219699/10154/10505/57522/10371/10509/3985/4233/1949/7223/1072/8  
?78/2768/8772/57121/355/5603/5594/4792/5970/9181/1902/9871/837/114548/3606/836/203068/5  
)/4233/5159/1292/5154/1311/857/7148/1284/5594/3915/55742/10627/3694/7408/3690/10398/395  
5594/25865/5335/3689/2252/5332/1902/1945/7408/2775/3690/2776/3845/9170/5898/2771/51466.  
/7042/117581/3316/5335/4478/3690/836/3845/3710/4060/10855/2260/7097/3091/7482/960/4313  
0/5313/5564/5170/1977/91860/90673/5106/1398/5602/80201/5501/5601/5599/8660/5105/5590/2

6/5880

/4609

'9/7409/9846/8612/27040/7454/8877/2213/10095/10109/5880/65108  
5072/124044/637/6774/8772/90865/148022/5478/3460/355/5834/817/6778/6772/6776/1536/5834  
3/3710/581/3553/8767/11337/834/10094/960/9266/6352/5216/3554/10392/60/3678/10616/7335/7

I/5925/581/867/9846/1871/7157/1026/1643/4609

30/2308/11200/7040/891/678/55957/5054/5603/3134/5594/7042/5970/3552/3845/8900/3710/592  
3/10605/348995/2733/79833/55520/51367/1964/9883/100101267/11269/8894/51095/55308/12940  
'1284/3915/4792/5970/1164/836/5925/581/9134/5743/317/1871/7157/7185/1026/3675/1643/3918  
0/5564/91860/5106/57223  
I83/3914/8324/8515/8772/80326/9519/5649/148022/5159/1292/23352/1311/355/7148/1284/3134.  
I8/1284/375790/3915/3694/3690/3696/960/3678/3675/3676/7058/7450/961/3918

30/8678/1351/4714/4700/4712/5481/1329/4724/4711/842/4704/55081/4698/847/7384/6392/5717.  
'57142/4700/4712/5481/1329/4724/4711/842/4704/4698/7384/2597/6392/5717/7416/5705/4728/4  
4711/842/4704/4698/847/7384/6392/5717/4747/7416/5705/10013/4728/11345/5683/4695/4723/1.  
700/4712/1329/4724/5468/4711/842/4704/55081/4698/23186/7384/6392/5717/7416/5705/4728/5  
2/1329/4724/4711/842/4704/4698/4128/7384/6392/5717/7416/5705/4728/5683/4695/4723/810/1.  
2/1329/4724/4711/842/4704/4698/7384/10963/6392/5717/7416/5705/4728/5683/4695/4723/1263.  
9/4724/5468/4711/4704/65260/27330/25915/4698/6009/7384/788/6392/4728/6595/107/4695/472

3/4967/50/847/51179/1892/2098/5230/2597/1962/729020/6392/2203/2023/51/5160/83440/4190/!  
321/5684/5688/4976/2905/2475/9861/10524/5582/55062/2959/5715/5289/5700/5693/5714/5682/.  
'43/1719/221264/124454/51109/2729/169355/8564/55163/80347/64802/8836/10229/23475/7372/  
34/6392/6720/4728/4695/4723/126328/79602/4694/5313/5564/51094/9167/4713/4716/55967/560  
716/55967/5602/4697

33

287  
34902

8/54657

'8528/11264/5052/11001/5826/5828/8800/10005/8310/10478/4598/92960/5194/51268/54363/106

/4698/7384/6392/526/4728/528/4695/4723/126328/4694/9167/4713/4716/55967/7381/4697/1097  
658/54657/50484  
445329/221  
2806

/920/945/3684/915/911/3566/912/3112/3675/914/3676/1436/3575  
3/5579/1906/3725/3383/7412/3576/1958  
53/4615/718/3725/3576

80/3725/7128/3934/3576/6372/2920/2919  
7/3108/3109/920/7535/915/3718/3566/3932/27040/3112/4773/864/2353/6775/3725  
'3676/2353/4615/718/3725/4689/65108  
'6374/6364/3112/2353/3725/3383/10312/3576/6372/2920/2919  
2/3576/330/2920/2919  
6/6348/6349/414062/9641/7097/51284/51311/6352/2353/23643/4615/3665/3725/3576/3455  
3253/834/2207/602/10379/5971/1263/4773/22808/1959/30835/6237/3725/29108  
/3553/7097/3554/5579/3684/911/912/5272/87/3918/3576/2920/2919  
'3075/714/2213/2357/715/717/718/3383  
353/3725/27071/5880/8519  
'3560/3115/3091/916/4794/919/9466/3662/917/3554/3108/196/3109/920/7535/915/3718/50615/3

9/414062/6375/729230/6363/1234/6357/1235/1236/6347/6358/6352/8807/6374/8797/7133/6364/  
'3725  
5/7097/3108/3109/8807/50615/3566/3112/6775/3725

)/6372

3/4689/3383/87/9076/5880/7412/83593

792/5970/6772/4599/6776/4478/3552/836/581/3553/940/9134/3560/9641/7097/51284/916/317/3

5/896/3566/3601/1439/1026/9021/6775/3587/894/3575/4609/3455  
109/5880/3576/29108/391  
3/3845/399694/3821/3822/5551/3133/3107/3105/22914/919/2207/7305/5579/7409/7535/5777/36  
3105/1364/6403/3696/6401/959/3108/3109/923/920/3684/3683/6404/1001/3112/1462/6614/914/3  
66/1522/6709/3563/597/839/4001/1521/317/60/4000/1616/7157/8797/1439/7132/7185/2353/372  
'6401/6347/602/6352/11035/3976/6374/7133/6364/1906/7132/7185/2353/9021/3725/3383/3726/7  
132/3587/23643/4615/3918/330  
146/3105/4688/811/2212/653361/3108/60/3678/3109/3684/6890/3112/2213/30835/715/7058/111  
3552/9020/10859/9103/3553/8792/2274/2209/695/10288/11025/4688/3727/2212/10379/3554/653  
76/2207/2212/60/113/6916/3937/10235/6786/7450/83706/54518  
'78/7042/4792/5970/6772/6776/332/836/3845/8900/5925/581/9134/890/1960/9641/7097/317/557  
4261/3119/8767/3115/2209/7097/3687/26253/317/2207/2212/3108/3109/3684/1263/3112/8877/7  
'2530/942/7030/958/3560/597/890/2120/2209/904/5966/2119/51274/55589/3684/8013/7157/7185  
1/148022/9051/5603/5594/4792/5970/6772/1536/5332/118429/837/51393/114548/3606/3710/641  
5/3107/9134/6672/890/8379/1960/3105/4067/1234/5966/991/10379/3718/896/7157/7185/1026/59  
'78772/90865/103/148022/3117/3126/3123/3460/355/5594/4792/5970/6772/4599/29107/3113/114  
3405/90427/1789/1545/1945/3690/7431/836/3845/8434/399694/1788/2146/4363/9134/6624/5743  
776/3845/6362/399694/5197/2771/6846/6348/6349/414062/6375/729230/2791/6363/4067/1234/6  
2/3572/2782/836/3845/3710/5925/581/3133/942/3107/11337/9641/2791/3105/3091/5743/4067/12  
17/3126/3123/355/5603/3134/4792/5970/6772/3113/7431/9020/836/8900/9636/5925/581/3133/6  
'3570/6173/2266/6224/2243/5603/5594/4792/6142/11224/5335/5970/6772/4599/3572/1536/2244/  
17/3126/3123/196883/4215/3134/5594/7042/4792/5970/6776/3689/3113/9020/3845/8900/5925/5  
'4/2768/8772/3570/196883/355/5603/3134/5594/4792/5970/6351/2782/5332/2775/3690/2776/836  
303/3134/5594/4792/8905/5335/5970/2782/60489/2775/2776/836/3845/3710/684/581/3133/6891/

4548/3606/836/10398/203068/197259/581/5898/10376/84617/6281/3553/29109/8767/7097/302/5  
460/355/85480/3595/7042/56477/6373/6359/6351/3572/9518/1524/8809/10563/3606/3552/4050/  
8/4233/5159/4254/5154/5598/1849/355/4215/57551/4296/5603/5594/7042/5970/929/2252/1945/  
7/7855/7477/2887/6520/10670/7479/525/10325/2475/8323/5582/5604/5562/3667/9296/55615/387

/6041/285268/389114/390980/8503/7752/25799/148254/117608/79973/23586/342909/163050/35/  
7/5594/6778/3915/7042/862/4792/5335/5970/6772/374654/6776/3572/2252/2782/5332/2950/190.

70/6772/4599/975/836/3845/5925/581/9641/1365/1364/317/10379/4600/1871/7157/7132/1026/9  
17/5594/5335/10627/54910/2051/54961/1945/1808/5998/3845/10398/57689/10507/2242/57556/2  
9170/581/10376/84617/3553/7456/1365/4641/1364/5063/834/10094/2212/9266/3554/60/5777/30  
3694/5063/3696/3082/60/3678/2316/5579/7409/7791/896/64098/3675/3676/7058/3725/7450/87/8  
/2260/2903/55740/1268/1969/5216/3082/60/5579/7409/113/5900/3684/3683/27040/3937/22808/  
3/2535/867/406991/3082/60/3678/2316/5579/7409/5777/967/5329/6469/7157/3059/1026/22808/1  
2475/5770/5604/5562/3667/5257/5577/6198/53358/6199/6194/572/805/79660/3632

3/114548/3552/8605/197259/581/3553/834/10379/11035/10616/3718/8797/7132/6775/7128/2910  
7157/3059/9844/7132/10095/4615/718/3725/87/10109/3576/29108

5/3133/3107/9134/890/3105/2113/90550/1871/896/7157/4773/10758/1026/22808/677/6237/894/  
01/26019/8892/4928/1983/22985/1915/8661/10775/56001/5411/1967/138716/8086/7175/22916/8  
3/330/4609

/5594/3915/5970/6772/4599/3694/9794/3690/836/3845/8900/8992/9636/5925/581/3133/3107/91.

/4747/7416/5705/4728/11345/5683/4695/4723/810/342371/126328/10133/8322/4694/5663/9167/  
4311/5683/4695/4723/810/126328/8322/4694/5663/9167/5718/4713/51107/79861/7855/55102/41  
26328/10133/6396/4694/9167/5718/4713/10120/79861/55102/5702/4716/348995/5217/55860/27:  
683/1387/4695/4723/1213/126328/4694/9167/5718/5431/4713/10120/79861/55102/5702/4716/55  
26328/4694/9167/5718/4713/79861/7326/4137/5702/4716/91860/7419/55967/118424/25828/5602  
28/727/3312/4694/9167/5718/4713/79861/5702/4716/7419/55967/5602/7381/4697/10975/1337/5  
'3/285521/126328/4694/1376/5564/51780/9167/4713/4716/6597/388753/55967/51287/7381/4697

5213/39/6120/5313/4524/5631/48/5226/229/132158/3030/80201/3419/8310/7167/5095/5723/557  
29982/773  
219/6697/1723/5313/7389/10327/54576/205/93100/54577/54600/79646/5372/57026/51601/5457:  
12/7381/4697/10975/1337/5601/5599/8660/6256

i54/1384/26063/5824/4358/5192/25824

'5/1337/155066/27068/525/479

3566/3932/27040/3112/4773/2353/3725

7132/1436/3587/6366/51554/6368/3576/6372/2920/2919

310/10379/4600/917/6504/915/3718/896/7157/2213/2353/30835/4939/4615/3665/3725/7128/894

83/3932/27040/8797/3937/4773/962/3383/10870/5880/3455  
3676/6402/3383/9076/7412/57502  
5/330/7846  
7128/7412/330/9586/6372/2920/2919

51/718/4689/10312/7846  
3361/7305/5971/8600/9846/3932/3937/7132/4773/55423/2213/2353/9021/1436/3725/4689/3726/

9/3718/1871/7157/4773/1026/1959/2353/6775/4615/1643/3665/3725/3576/4609/9586  
7132/2213/30835/3587/11151/4615/718/10312  
5/1026/1436/1643/5371/894/64332/3576/1848/330/4609  
127/3553/115362/8767/11337/9641/22861/84674/834/6347/10379/6352/11035/10392/3428/10616  
22/9734/1959/3665/718/3725/87/894/9586  
4548/3606/3552/836/581/3553/4261/3119/3115/9641/51284/834/11100/317/6347/5611/10379/46  
3/3925/4082/27086/960/406991/3678/5579/1871/6659/7157/1026/994/894/4609  
357/1235/3055/1236/6347/2790/6358/2870/54331/6352/653361/5579/7409/113/1794/3718/6374/  
234/3055/2790/9976/10379/54331/1871/7157/6932/7132/4773/1026/2353/3665/718/3725/3383/3  
891/930/958/3107/3119/9134/3115/890/695/9641/7097/3105/567/4067/916/4794/953/317/960/9  
6165/114548/6230/6154/6205/1675/6144/9636/716/6202/3553/51065/6223/629/6203/9641/7097/  
581/200186/3133/958/3107/3119/9134/3560/9232/3115/890/8379/4488/3105/567/916/991/2113/8  
3/3845/3710/11214/5925/581/3553/3133/6891/2771/3107/6348/6349/414062/2791/3105/567/574  
2771/3107/7097/2791/3105/567/1234/5063/916/2790/919/811/54331/917/5579/920/9582/27350/

5063/834/10094/388/9266/5216/11035/10392/60/2316/113146/399/3071/8797/6932/9844/7132/2:  
6362/133396/7293/944/1438/3594/3553/5197/8792/958/8771/3560/3563/6846/6348/6349/414062  
'3552/9020/836/3845/8605/3315/1850/3553/6789/5778/1326/2260/2323/11184/3925/1969/1847/':  
'6198/90423/6199

69/7188/3448/55762/80818/10838/578/3654/80264/84503/162655/84449/5610/841/26152/16307:  
2/1164/332/2776/836/3845/8900/5979/11040/1438/3594/9170/367/5925/581/5898/6789/2771/53

021/4939/3665/9076/4609/3455  
2771/22885/55740/5063/1969/6091/8829/6469/4773/23380/6237/5880  
71/8797/4642/3059/7132/2353/10095/64005/4615/4542/3725/9076/10109/3576/29108/7846  
394/3918/5880/330  
10235/2357/1436/6237/5880/83593/54518  
1839/6237/4609

08/330/3455

'3576/83593/4609  
34321/25929/8480/5976/728343/728689/55998/10940/9775/51068/10557/10556/9984/23225/5712

34/3659/890/9641/3105/5743/7482/3696/2535/10379/4600/26508/3678/896/7157/6932/7132/102

'5718/4713/10120/79861/7326/7855/55102/4137/5702/4716/55860/7477/91860/7419/140775/559  
.37/5702/4716/7477/91860/7419/55967/3028/5602/25825/7381/4697/10975/5664/1337/5601/5701  
33/140775/55967/7381/4697/10975/9883/100101267/1337/5706/375189/9821/5684/5688/129401.  
5860/7419/55967/5602/5435/7381/4697/10975/1337/5601/5706/293/5599/9821/5684/5688/51164  
2/7381/4697/10975/1337/10131/7345/5601/5706/293  
580/5601/5706/293/1457/5599  
/10975/1337/137682/84987/9658

53

8/54575/54659/54579/1503/2730/554235/112724/2990/23498/54658/54657/248/3242/6472/54490



l/3455

2355/3455

i/90550/114769/9447/4939/4615/3665/3725/2634/7128/3576/29108/330/2920/2919/3455

00/6352/3108/60/5579/3109/896/8797/7177/3112/7132/64499/9021/4939/4615/3665/5371/56649

/7454/3702/9844/6364/10235/2268/6366/6368/5880/3576/58191/6372/2920/2919

576/7538/4609/2920/2919/3455

19/811/10379/917/3108/3109/5971/3683/915/3718/1871/896/7157/6890/3112/1026/864/4939/46  
/51284/834/6403/6169/6347/6157/51311/2212/10379/6181/4600/140801/728/5579/713/25873/88  
311/917/3554/3108/3109/5971/920/113/3683/915/3718/1871/896/8829/3932/706/7157/3601/311:  
3/1234/6347/2790/811/54331/6352/3554/5579/113/1871/7157/6890/7132/4773/1026/3587/5880/  
/915/8906/6890/7133/7132/4773/2353/4615/3725/25939/5880

353/10095/23643/4615/6237/3725/10109/3576/29108/391/330/4609/7846  
2/1441/6375/729230/338376/6363/9180/3574/1234/6357/1235/1236/6347/9466/6358/6352/959/3!  
3310/3727/3554/11221/1846/9448/3082/2316/5579/7786/5971/374/1616/7157/1844/7132/22808/

1/637/7187/4940/7695/3118/126017/9534/284307/8772/9831/8764/81856/148022/9451/84914/31  
66/9134/3560/3563/2260/890/1441/2323/2791/3091/3574/5743/7482/317/2113/405/2790/4313/2

2/55746/9972/5901/1974/79023/11260/1981/55916/81929/23636/8667

6/3675/3676/7058/8638/7450/894/3918/10312/9586/3455

67/3028/118424/5602/7381/4697/10975/5664/1337/10131/7345/5601/5706/293/1457/5599/1020/  
6/293/1457/5599/1020/488/9821/7479/8660/5684/5688/2905/2475/8323/4709/9861/8883/348/56/  
/51164/2905/2475/5868/84134/4709/9861/4928/10452/3181/3084/310/5606/55062/29979/25978/  
/2475/4709/9861/55062/5715/4719/4710/5440/5289/5700/2880/5693/6874/27089/5714

)

W/3383/3576/29108/3455

15/1643/3665/3725/3383/7128/894/4609/3455

29/2197/6168/200916/7132/714/2353/715/4939/1839/717/4615/718/3725/7450/729/6136/3576/3  
2/7132/4773/1026/1959/2353/3725/4316/3383/894/7538/4609/9586/1958

3576/4609/9586

554/23765/3976/920/8600/650/8807/10673/3624/50615/6374/3566/8797/939/7133/3601/6364/14  
5922/10235/2353/1436/4615/784/6237/3725/994/5880/1848/4609

.17/3126/54811/115509/170960/3123/3460/81931/140612/125893/355/339559/3134/4792/79088/  
535/867/54331/3082/26508/5579/113/5900/650/3718/1871/896/3566/6469/7157/6932/3601/1906

'488/9821/7479/5684/5688/51164/2905/2475/5868/84134/8323/4709/9861/10452/5582/5606/731'  
04/55062/5715/4719/1131/4710/5289/5700/3667/5693/27089/5714/50507  
'5715/56001/4719/4710/5289/5700/2880/5693/27089/7175/5714



39/7132/3603/1436/3587/6366/51554/608/6368/3575/3576/58191/9235/6372/2920/2919/3455

5970/6772/147660/55659/3113/90321/3690/836/90338/90827/684/90649/581/972/3553/3133/689  
i/1439/7185/1026/3675/10235/2353/6775/1436/1643/3725/5371/894/3918/5880/3575/3576/83593



6/5604/55062/25978/5715/4719/1131/4710/5289/5700/2880/5693/27089/5714/55669/50507



91/5199/3107/3119/6672/65243/3115/9641/7097/3105/567/163227/317/6347/811/10379/6352/310  
3/330/4609/3455





08/3678/3109/10308/1616/94039/7157/6890/3112/7132/9021/4939/4615/3665/718/5371/330/345
