# Supplementary material for: The Potential Diagnostic Value of Immune-Related Genes in Interstitial Fibrosis and Tubular Atrophy after Kidney Transplantation
Source: Hindawi journal article supplement (doi:10.1155/2022/7212852), 2022-06-17
Supplement: f1 [file 7212852.f1.zip]

| ID       | Description  | setSize | enrichment | NES      | pvalue   | p.adjust | qvalues  | rank |
|----------|--------------|---------|------------|----------|----------|----------|----------|------|
| hsa05200 | Pathways i   | 492     | 0.298313   | 1.646683 | 0.001319 | 0.007961 | 0.004061 | 3454 |
| hsa05168 | Herpes sim   | 427     | 0.415988   | 2.264992 | 0.001335 | 0.007961 | 0.004061 | 5725 |
| hsa05165 | Human pa     | 316     | 0.305065   | 1.614986 | 0.001404 | 0.007961 | 0.004061 | 3199 |
| hsa04060 | Cytokine-c   | 249     | 0.388902   | 2.017534 | 0.001416 | 0.007961 | 0.004061 | 3393 |
| hsa05132 | Salmonella   | 244     | 0.399936   | 2.068757 | 0.001418 | 0.007961 | 0.004061 | 3645 |
| hsa04510 | Focal adhe   | 196     | 0.321728   | 1.612719 | 0.001453 | 0.007961 | 0.004061 | 2746 |
| hsa05163 | Human cyt    | 210     | 0.393352   | 1.986707 | 0.001456 | 0.007961 | 0.004061 | 4102 |
| hsa05166 | Human T-c    | 211     | 0.492047   | 2.485744 | 0.001456 | 0.007961 | 0.004061 | 2852 |
| hsa05131 | Shigellosis  | 209     | 0.359561   | 1.817386 | 0.001458 | 0.007961 | 0.004061 | 3891 |
| hsa05171 | Coronavir    | 195     | 0.510455   | 2.555869 | 0.001458 | 0.007961 | 0.004061 | 3247 |
| hsa04015 | Rap1 signa   | 194     | 0.341593   | 1.708855 | 0.00146  | 0.007961 | 0.004061 | 2756 |
| hsa05169 | Epstein-Ba   | 194     | 0.527837   | 2.640566 | 0.00146  | 0.007961 | 0.004061 | 2735 |
| hsa05130 | Pathogenic   | 184     | 0.463614   | 2.302486 | 0.001466 | 0.007961 | 0.004061 | 3118 |
| hsa05170 | Human im     | 191     | 0.433764   | 2.164024 | 0.001466 | 0.007961 | 0.004061 | 2489 |
| hsa04062 | Chemokine    | 177     | 0.450634   | 2.225044 | 0.001484 | 0.007961 | 0.004061 | 3972 |
| hsa05167 | Kaposi sarc  | 175     | 0.457778   | 2.260694 | 0.00149  | 0.007961 | 0.004061 | 3390 |
| hsa05152 | Tuberculos   | 171     | 0.443535   | 2.186616 | 0.001497 | 0.007961 | 0.004061 | 3393 |
| hsa05135 | Yersinia inf | 130     | 0.466263   | 2.212726 | 0.001515 | 0.007961 | 0.004061 | 3134 |
| hsa05164 | Influenza A  | 162     | 0.528438   | 2.581985 | 0.001517 | 0.007961 | 0.004061 | 3449 |
| hsa04210 | Apoptosis    | 129     | 0.416385   | 1.97077  | 0.001524 | 0.007961 | 0.004061 | 3891 |
| hsa05206 | MicroRNA     | 163     | 0.379579   | 1.853382 | 0.001524 | 0.007961 | 0.004061 | 3969 |
| hsa04621 | NOD-like r   | 161     | 0.473362   | 2.309382 | 0.001527 | 0.007961 | 0.004061 | 3365 |
| hsa05203 | Viral carcin | 161     | 0.453599   | 2.212965 | 0.001527 | 0.007961 | 0.004061 | 4119 |
| hsa05162 | Measles      | 132     | 0.502592   | 2.388609 | 0.001534 | 0.007961 | 0.004061 | 3199 |
| hsa04650 | Natural kill | 119     | 0.478762   | 2.235225 | 0.001538 | 0.007961 | 0.004061 | 2646 |
| hsa04380 | Osteoclast   | 122     | 0.55572    | 2.603478 | 0.001541 | 0.007961 | 0.004061 | 3664 |
| hsa04514 | Cell adhesi  | 136     | 0.499722   | 2.380976 | 0.001546 | 0.007961 | 0.004061 | 3822 |
| hsa04145 | Phagosome    | 144     | 0.500462   | 2.398906 | 0.001553 | 0.007961 | 0.004061 | 1980 |
| hsa05160 | Hepatitis C  | 144     | 0.419712   | 2.011839 | 0.001553 | 0.007961 | 0.004061 | 3199 |
| hsa05202 | Transcripti  | 158     | 0.390299   | 1.891903 | 0.001558 | 0.007961 | 0.004061 | 3957 |
| hsa04666 | Fc gamma     | 95      | 0.455184   | 2.030594 | 0.00156  | 0.007961 | 0.004061 | 2206 |
| hsa05161 | Hepatitis B  | 157     | 0.462291   | 2.240539 | 0.00156  | 0.007961 | 0.004061 | 3393 |
| hsa04670 | Leukocyte    | 105     | 0.453519   | 2.059687 | 0.001563 | 0.007961 | 0.004061 | 2250 |
| hsa04668 | TNF signal   | 108     | 0.567175   | 2.592221 | 0.00157  | 0.007961 | 0.004061 | 2873 |
| hsa05142 | Chagas dis   | 97      | 0.496593   | 2.221176 | 0.00157  | 0.007961 | 0.004061 | 3972 |
| hsa05145 | Toxoplasma   | 108     | 0.525696   | 2.402646 | 0.00157  | 0.007961 | 0.004061 | 2408 |
| hsa04659 | Th17 cell d  | 96      | 0.562285   | 2.511451 | 0.001572 | 0.007961 | 0.004061 | 3393 |
| hsa04660 | T cell rece  | 96      | 0.487228   | 2.176208 | 0.001572 | 0.007961 | 0.004061 | 3891 |
| hsa04064 | NF-kappa     | 98      | 0.543215   | 2.431265 | 0.001577 | 0.007961 | 0.004061 | 3664 |
| hsa04620 | Toll-like re | 98      | 0.488286   | 2.18542  | 0.001577 | 0.007961 | 0.004061 | 3972 |
| hsa04625 | C-type lect  | 98      | 0.421823   | 1.887952 | 0.001577 | 0.007961 | 0.004061 | 4081 |
| hsa05146 | Amoebiasis   | 98      | 0.493575   | 2.209092 | 0.001577 | 0.007961 | 0.004061 | 3608 |
| hsa04640 | Hematopo     | 91      | 0.573388   | 2.528317 | 0.001582 | 0.007961 | 0.004061 | 2478 |
| hsa04933 | AGE-RAGE     | 99      | 0.402418   | 1.805328 | 0.001582 | 0.007961 | 0.004061 | 2932 |
| hsa04657 | IL-17 signa  | 86      | 0.482183   | 2.109081 | 0.001597 | 0.007961 | 0.004061 | 2433 |
| hsa04658 | Th1 and Th   | 86      | 0.556748   | 2.43523  | 0.001597 | 0.007961 | 0.004061 | 3375 |
| hsa05222 | Small cell l | 90      | 0.449209   | 1.973763 | 0.001597 | 0.007961 | 0.004061 | 3136 |
| hsa05323 | Rheumatoi    | 90      | 0.497879   | 2.18761  | 0.001597 | 0.007961 | 0.004061 | 2133 |
| hsa04061 | Viral prote  | 87      | 0.560678   | 2.45187  | 0.001605 | 0.007961 | 0.004061 | 3344 |
| hsa05235 | PD-L1 exp    | 87      | 0.502732   | 2.198469 | 0.001605 | 0.007961 | 0.004061 | 4013 |
| hsa04662 | B cell rece  | 79      | 0.524783   | 2.249213 | 0.001653 | 0.007961 | 0.004061 | 4496 |
| hsa04115 | p53 signal   | 72      | 0.44478    | 1.865312 | 0.001681 | 0.007961 | 0.004061 | 3136 |
| hsa04610 | Compleme     | 77      | 0.449271   | 1.910074 | 0.001681 | 0.007961 | 0.004061 | 2862 |
| hsa04612 | Antigen pr   | 77      | 0.531802   | 2.260953 | 0.001681 | 0.007961 | 0.004061 | 2307 |
| hsa05150 | Staphylocc   | 73      | 0.635831   | 2.675075 | 0.001689 | 0.007961 | 0.004061 | 1994 |
| hsa05133 | Pertussis    | 71      | 0.575944   | 2.411382 | 0.001692 | 0.007961 | 0.004061 | 3134 |
| hsa05321 | Inflammato   | 55      | 0.597999   | 2.39961  | 0.001692 | 0.007961 | 0.004061 | 3934 |

|          |               |     |          |          |          |          |          |      |
|----------|---------------|-----|----------|----------|----------|----------|----------|------|
| hsa05140 | Leishmania    | 74  | 0.655815 | 2.766026 | 0.001698 | 0.007961 | 0.004061 | 2373 |
| hsa05416 | Viral myoc    | 58  | 0.652177 | 2.63942  | 0.001712 | 0.007961 | 0.004061 | 2489 |
| hsa05134 | Legionello    | 57  | 0.518467 | 2.090567 | 0.001715 | 0.007961 | 0.004061 | 1387 |
| hsa05320 | Autoimmu      | 44  | 0.646251 | 2.468702 | 0.001715 | 0.007961 | 0.004061 | 2438 |
| hsa05144 | Malaria       | 47  | 0.555119 | 2.141365 | 0.001739 | 0.007961 | 0.004061 | 2133 |
| hsa04672 | Intestinal ir | 42  | 0.597435 | 2.25789  | 0.001745 | 0.007961 | 0.004061 | 1846 |
| hsa04940 | Type I diab   | 41  | 0.630697 | 2.371354 | 0.001748 | 0.007961 | 0.004061 | 2438 |
| hsa05332 | Graft-versu   | 41  | 0.643325 | 2.418834 | 0.001748 | 0.007961 | 0.004061 | 2438 |
| hsa05322 | Systemic lu   | 48  | 0.703905 | 2.717372 | 0.001773 | 0.007961 | 0.004061 | 3181 |
| hsa05340 | Primary im    | 34  | 0.635036 | 2.296074 | 0.001779 | 0.007961 | 0.004061 | 3481 |
| hsa05330 | Allograft re  | 33  | 0.74187  | 2.665867 | 0.001795 | 0.007961 | 0.004061 | 2438 |
| hsa00532 | Glycosamir    | 20  | 0.686132 | 2.170337 | 0.001825 | 0.007961 | 0.004061 | 2986 |
| hsa05310 | Asthma        | 23  | 0.715703 | 2.327229 | 0.001862 | 0.007961 | 0.004061 | 2433 |
| hsa00360 | Phenylalan    | 17  | -0.69426 | -2.15806 | 0.002119 | 0.007961 | 0.004061 | 4103 |
| hsa01210 | 2-Oxocarb     | 18  | -0.71102 | -2.26167 | 0.002128 | 0.007961 | 0.004061 | 3176 |
| hsa00650 | Butanoate     | 24  | -0.69103 | -2.4153  | 0.002146 | 0.007961 | 0.004061 | 3434 |
| hsa00053 | Ascorbate     | 23  | -0.58496 | -2.0157  | 0.002151 | 0.007961 | 0.004061 | 6866 |
| hsa00790 | Folate bios   | 23  | -0.73424 | -2.53009 | 0.002151 | 0.007961 | 0.004061 | 3012 |
| hsa00020 | Citrate cyc   | 29  | -0.65004 | -2.42062 | 0.002169 | 0.007961 | 0.004061 | 3109 |
| hsa00630 | Glyoxylate    | 29  | -0.70463 | -2.6239  | 0.002169 | 0.007961 | 0.004061 | 3109 |
| hsa00410 | beta-Alani    | 28  | -0.68886 | -2.5316  | 0.002179 | 0.007961 | 0.004061 | 3434 |
| hsa00640 | Propanoat     | 30  | -0.70713 | -2.6339  | 0.002198 | 0.007961 | 0.004061 | 3434 |
| hsa00220 | Arginine b    | 20  | -0.60924 | -1.99633 | 0.002203 | 0.007961 | 0.004061 | 2910 |
| hsa00340 | Histidine r   | 21  | -0.71623 | -2.38525 | 0.002212 | 0.007961 | 0.004061 | 2401 |
| hsa00620 | Pyruvate r    | 36  | -0.62281 | -2.42823 | 0.002222 | 0.007961 | 0.004061 | 3109 |
| hsa00350 | Tyrosine r    | 33  | -0.57379 | -2.16565 | 0.002247 | 0.007961 | 0.004061 | 4373 |
| hsa00260 | Glycine, se   | 35  | -0.70918 | -2.71997 | 0.002268 | 0.007961 | 0.004061 | 3142 |
| hsa04975 | Fat digesti   | 35  | -0.52554 | -2.01564 | 0.002268 | 0.007961 | 0.004061 | 2829 |
| hsa00250 | Alanine, as   | 34  | -0.48688 | -1.8407  | 0.002273 | 0.007961 | 0.004061 | 2864 |
| hsa00330 | Arginine ai   | 48  | -0.54645 | -2.28205 | 0.002283 | 0.007961 | 0.004061 | 2864 |
| hsa00380 | Tryptophai    | 40  | -0.52245 | -2.09249 | 0.002288 | 0.007961 | 0.004061 | 3109 |
| hsa00071 | Fatty acid c  | 42  | -0.6192  | -2.49977 | 0.002331 | 0.007961 | 0.004061 | 3558 |
| hsa00270 | Cysteine ai   | 46  | -0.42648 | -1.75111 | 0.002364 | 0.007961 | 0.004061 | 5095 |
| hsa00280 | Valine, leu   | 46  | -0.71143 | -2.92109 | 0.002364 | 0.007961 | 0.004061 | 3434 |
| hsa00010 | Glycolysis    | 57  | -0.49924 | -2.13173 | 0.002387 | 0.007961 | 0.004061 | 3195 |
| hsa00310 | Lysine deg    | 59  | -0.41218 | -1.76672 | 0.002415 | 0.007961 | 0.004061 | 3109 |
| hsa01212 | Fatty acid r  | 55  | -0.43541 | -1.83215 | 0.002433 | 0.007961 | 0.004061 | 5388 |
| hsa04976 | Bile secreti  | 71  | -0.39093 | -1.76816 | 0.002433 | 0.007961 | 0.004061 | 3165 |
| hsa03320 | PPAR signa    | 68  | -0.46662 | -2.0765  | 0.002439 | 0.007961 | 0.004061 | 4855 |
| hsa04260 | Cardiac mi    | 68  | -0.41944 | -1.86654 | 0.002439 | 0.007961 | 0.004061 | 6741 |
| hsa04721 | Synaptic ve   | 68  | -0.38511 | -1.71375 | 0.002439 | 0.007961 | 0.004061 | 4212 |
| hsa04740 | Olfactory t   | 73  | -0.44595 | -2.02481 | 0.002439 | 0.007961 | 0.004061 | 4806 |
| hsa04146 | Peroxisom     | 77  | -0.55244 | -2.51621 | 0.002457 | 0.007961 | 0.004061 | 4719 |
| hsa01230 | Biosynthes    | 65  | -0.41514 | -1.82127 | 0.002519 | 0.00808  | 0.004122 | 3408 |
| hsa00190 | Oxidative p   | 98  | -0.58924 | -2.83034 | 0.002717 | 0.008547 | 0.00436  | 4310 |
| hsa04151 | PI3K-Akt s    | 321 | 0.285017 | 1.512478 | 0.002786 | 0.008547 | 0.00436  | 3969 |
| hsa01240 | Biosynthes    | 142 | -0.39216 | -2.01067 | 0.002801 | 0.008547 | 0.00436  | 3408 |
| hsa01200 | Carbon me     | 110 | -0.55856 | -2.71545 | 0.002809 | 0.008547 | 0.00436  | 3195 |
| hsa04010 | MAPK sign     | 274 | 0.283225 | 1.482007 | 0.002841 | 0.008547 | 0.00436  | 3969 |
| hsa04932 | Non-alcoh     | 137 | -0.33353 | -1.6959  | 0.002841 | 0.008547 | 0.00436  | 4043 |
| hsa04723 | Retrograde    | 121 | -0.32614 | -1.61434 | 0.002849 | 0.008547 | 0.00436  | 4310 |
| hsa04217 | Necroptos     | 124 | 0.394407 | 1.857009 | 0.003053 | 0.008688 | 0.004431 | 3664 |
| hsa05418 | Fluid shear   | 132 | 0.33732  | 1.603143 | 0.003067 | 0.008688 | 0.004431 | 3041 |
| hsa04110 | Cell cycle    | 117 | 0.376701 | 1.747675 | 0.003086 | 0.008688 | 0.004431 | 3597 |
| hsa04630 | JAK-STAT      | 139 | 0.368221 | 1.757681 | 0.003086 | 0.008688 | 0.004431 | 2987 |
| hsa04218 | Cellular sei  | 148 | 0.367926 | 1.770102 | 0.003091 | 0.008688 | 0.004431 | 3910 |
| hsa03040 | Spliceosom    | 128 | 0.370563 | 1.747333 | 0.003096 | 0.008688 | 0.004431 | 5392 |
| hsa04714 | Thermoge      | 189 | -0.40121 | -2.12892 | 0.003106 | 0.008688 | 0.004431 | 3877 |

|          |              |     |          |          |          |          |          |      |
|----------|--------------|-----|----------|----------|----------|----------|----------|------|
| hsa04611 | Platelet act | 114 | 0.382702 | 1.763407 | 0.00311  | 0.008688 | 0.004431 | 2746 |
| hsa05012 | Parkinson c  | 203 | -0.33347 | -1.78819 | 0.003195 | 0.008847 | 0.004513 | 4310 |
| hsa04020 | Calcium sig  | 205 | -0.29873 | -1.59991 | 0.003247 | 0.008869 | 0.004524 | 2833 |
| hsa04512 | ECM-recep    | 82  | 0.390481 | 1.680974 | 0.003257 | 0.008869 | 0.004524 | 1838 |
| hsa05220 | Chronic my   | 76  | 0.388251 | 1.650207 | 0.003373 | 0.009106 | 0.004645 | 4907 |
| hsa04080 | Neuroactiv   | 239 | -0.32141 | -1.77335 | 0.003425 | 0.00917  | 0.004677 | 3684 |
| hsa05022 | Pathways c   | 402 | -0.23539 | -1.3772  | 0.003774 | 0.010022 | 0.005112 | 4198 |
| hsa00900 | Terpenoid    | 22  | -0.55768 | -1.88971 | 0.00432  | 0.011328 | 0.005778 | 5575 |
| hsa05205 | Proteoglyc   | 199 | 0.304879 | 1.529085 | 0.004354 | 0.011328 | 0.005778 | 2646 |
| hsa04966 | Collecting   | 27  | -0.53245 | -1.92301 | 0.004396 | 0.011328 | 0.005778 | 4212 |
| hsa04744 | Phototrans   | 20  | -0.58383 | -1.91307 | 0.004405 | 0.011328 | 0.005778 | 4399 |
| hsa00040 | Pentose ar   | 26  | -0.50507 | -1.79088 | 0.004474 | 0.011415 | 0.005822 | 6866 |
| hsa00561 | Glycerolipi  | 55  | -0.40573 | -1.70728 | 0.004866 | 0.012318 | 0.006283 | 3061 |
| hsa05100 | Bacterial in | 67  | 0.409493 | 1.70508  | 0.005059 | 0.012706 | 0.006481 | 4007 |
| hsa05010 | Alzheimer    | 312 | -0.23785 | -1.35073 | 0.00678  | 0.016882 | 0.008611 | 4198 |
| hsa05016 | Huntingtor   | 254 | -0.26383 | -1.46614 | 0.006826 | 0.016882 | 0.008611 | 4310 |
| hsa00982 | Drug meta    | 57  | -0.38427 | -1.64082 | 0.00716  | 0.017574 | 0.008964 | 5406 |
| hsa04810 | Regulation   | 204 | 0.292752 | 1.476441 | 0.007215 | 0.017576 | 0.008965 | 2900 |
| hsa05211 | Renal cell c | 65  | 0.384606 | 1.597829 | 0.008264 | 0.019835 | 0.010117 | 3900 |
| hsa05221 | Acute mye    | 65  | 0.387855 | 1.611326 | 0.008264 | 0.019835 | 0.010117 | 3891 |
| hsa04664 | Fc epsilon   | 63  | 0.405096 | 1.672824 | 0.008432 | 0.020087 | 0.010246 | 2206 |
| hsa00830 | Retinol me   | 50  | -0.40592 | -1.69287 | 0.009368 | 0.022154 | 0.0113   | 6866 |
| hsa04926 | Relaxin sig  | 119 | 0.328731 | 1.534766 | 0.010769 | 0.025284 | 0.012897 | 4674 |
| hsa05215 | Prostate ca  | 97  | 0.353007 | 1.578941 | 0.010989 | 0.025615 | 0.013065 | 4046 |
| hsa04623 | Cytosolic L  | 56  | 0.387382 | 1.556887 | 0.012007 | 0.027787 | 0.014174 | 3584 |
| hsa04071 | Sphingolip   | 116 | 0.328696 | 1.520499 | 0.012422 | 0.028545 | 0.01456  | 3979 |
| hsa03013 | RNA transp   | 152 | 0.301364 | 1.451839 | 0.013953 | 0.031837 | 0.016239 | 4948 |
| hsa04742 | Taste trans  | 47  | -0.40259 | -1.6591  | 0.014052 | 0.031837 | 0.016239 | 4838 |
| hsa00760 | Nicotinate   | 31  | -0.43492 | -1.63452 | 0.015521 | 0.034922 | 0.017813 | 4373 |
| hsa00970 | Aminoacyl    | 24  | -0.45877 | -1.60349 | 0.019313 | 0.043155 | 0.022012 | 4112 |
| hsa04360 | Axon guid:   | 173 | 0.285733 | 1.411471 | 0.019461 | 0.043188 | 0.022029 | 3900 |
| hsa00770 | Pantothen:   | 20  | -0.50891 | -1.66758 | 0.019824 | 0.043398 | 0.022136 | 3176 |
| hsa04977 | Vitamin dig  | 20  | -0.50749 | -1.66293 | 0.019824 | 0.043398 | 0.022136 | 3579 |
| hsa00980 | Metabolism   | 60  | -0.35002 | -1.5122  | 0.021378 | 0.046486 | 0.023711 | 5406 |
| hsa04622 | RIG-I-like r | 64  | 0.352051 | 1.459069 | 0.021776 | 0.047035 | 0.023991 | 3933 |
| hsa00601 | Glycosphing  | 27  | -0.4426  | -1.5985  | 0.021978 | 0.047158 | 0.024054 | 3858 |
| hsa00730 | Thiamine r   | 14  | -0.57312 | -1.67788 | 0.022727 | 0.048445 | 0.02471  | 4188 |

leading\_edcore\_enrichment

tags=29%, 1906/3918/3091/3576/330/3575/1284/7474/6775/5332/4792/5579/3725/5366/5880/46  
tags=51%, 330/7097/4792/3665/3108/3109/9021/718/10379/3115/6890/6347/3455/3119/3118/49  
tags=28%, 3918/1284/3694/7474/9586/3371/2535/3685/10379/5925/3065/896/10312/3455/7450/  
tags=34%, 6372/2919/2920/3576/6364/3575/3976/3554/58191/729230/56477/7852/9180/6374/14  
tags=33%, 3576/330/29108/7846/10109/5603/7097/4792/3725/302/4609/7100/10376/10095/6237  
tags=25%, 3918/330/1284/3694/87/3371/5579/3725/5880/64098/3685/896/7450/1286/894/3915/  
tags=39%, 3576/3554/5603/9586/5332/4792/5579/5880/4609/7852/4773/3685/3587/5925/3710/6  
tags=39%, 4316/3554/9586/3932/4792/3725/4609/3108/3109/4773/5925/896/3115/917/8829/311  
tags=35%, 3576/3059/29108/87/3554/10109/5603/5332/4792/3725/7100/718/92610/10095/3710/  
tags=43%, 3576/715/5603/7097/4792/5579/3725/6203/718/10379/716/714/2212/51284/629/6136  
tags=29%, 5603/5332/5579/5880/2357/10235/1268/1436/3937/3684/4254/6237/83593/2776/2247  
tags=41%, 4794/7128/5603/7097/4792/3665/3725/4609/3108/3109/4067/10379/5925/3065/896/3  
tags=35%, 9076/3576/1365/1364/3059/29108/3554/7846/10109/5603/4792/3725/7100/10376/100  
tags=31%, 5603/7097/4792/5579/3725/5880/7852/25939/9582/4773/3710/6890/917/891/7133/89  
tags=41%, 6372/2919/2920/3576/6364/58191/5332/4792/5579/729230/5880/56477/10235/7852/4  
tags=38%, 2919/2920/3091/3576/5603/4792/3665/3725/4609/4067/718/4773/10379/5925/3710/3  
tags=39%, 26253/11151/5603/7097/3108/3109/718/3587/2212/3115/3684/64581/10312/3119/311  
tags=33%, 3576/29108/10109/5603/3932/4792/3725/5880/4773/10095/2212/3937/6347/834/9844  
tags=49%, 3576/29108/4792/5579/3665/3108/3109/56649/9021/10379/896/3115/51284/6347/345  
tags=43%, 330/7846/4792/3725/5366/10376/3710/1439/839/317/2353/71/8797/7185/841/4001/6  
tags=39%, 1545/3371/6659/5579/4363/4609/406991/3065/894/4082/6774/6768/3690/994/1945/1  
tags=36%, 2919/2920/3576/330/29108/7128/5603/5332/4792/3665/3725/2634/3428/10379/3710/  
tags=42%, 87/9586/4792/3665/3725/5366/4067/718/10379/5925/3065/896/5922/894/6774/5966/  
tags=41%, 7128/7097/4792/3665/3725/3310/10379/896/51284/917/3455/4939/915/894/317/2353  
tags=36%, 3932/5579/5880/4773/962/3937/3455/3383/919/10870/7305/3107/3683/3460/8797/22  
tags=48%, 2355/2274/3554/5603/3932/4792/3725/55423/9021/4773/4689/1436/10379/2212/3937  
tags=47%, 9076/1001/1462/1365/1364/6402/914/7412/3108/3109/3685/3115/3684/3119/958/311  
tags=35%, 715/11151/7846/7097/3108/3109/718/4689/3685/10376/2212/3115/6890/3684/64581/  
tags=33%, 9076/1365/1364/4792/3665/4609/9021/10379/5925/975/3455/4939/317/6774/6772/84  
tags=40%, 64332/8842/3576/330/64919/4609/1436/3065/3684/958/3207/1848/894/2209/5966/84  
tags=33%, 65108/8612/10109/5579/5880/4067/10095/2212/653361/4082/2209/2213/7408/5788/1  
tags=38%, 3576/5603/6775/9586/7097/4792/5579/3665/3725/4609/4773/5925/317/2353/6774/46  
tags=30%, 9076/1365/1364/87/7412/5603/5579/5880/7852/4689/3684/3702/3383/653361/83593/  
tags=44%, 6372/2919/2920/1906/330/6364/3976/7128/7412/5603/9586/4792/3725/9021/6374/63  
tags=47%, 3576/5603/7097/5332/4792/3725/718/714/917/713/6347/915/919/6352/2776/2353/46  
tags=38%, 3918/330/5603/7097/4792/3108/3109/3310/3587/3115/3119/958/3118/3113/3915/677  
tags=52%, 3091/4794/3554/5603/3932/4792/3725/3108/3109/4773/196/3115/917/3119/3118/915  
tags=42%, 4794/5603/3932/4792/3725/4773/3937/917/3702/915/919/2353/1326/925/7535/5788/  
tags=51%, 2919/2920/3576/330/7128/3554/7412/3932/4792/5579/4067/10673/958/3383/6363/23  
tags=44%, 3576/5603/7097/4792/3665/3725/7100/51284/3455/958/6352/2353/1326/23643/4615/  
tags=42%, 26253/29108/5603/4792/3725/4773/10379/3710/64581/6237/834/5971/6772/22808/22  
tags=41%, 2919/2920/3918/3576/1284/87/3554/7097/5332/5579/912/911/5272/3684/1286/3915/  
tags=48%, 3575/3554/914/912/3108/3109/911/1438/100133941/1436/3115/917/3684/4254/3119/  
tags=33%, 1906/3576/1284/7412/5603/5332/5579/3725/6347/1958/3383/1286/6774/1282/1536/6  
tags=34%, 6372/2919/3934/2920/3576/6364/7128/5603/4792/3725/10758/6374/23765/6347/2353  
tags=51%, 4794/5603/6775/3932/4792/3725/3108/3109/4773/3115/917/3119/3118/915/3113/919  
tags=39%, 3918/330/1284/4792/4609/3685/5925/1286/3915/317/1282/3675/7185/1643/7187/718  
tags=36%, 6372/2919/2920/3576/6364/7097/3725/3108/3109/6374/10673/3115/6347/10312/3119  
tags=47%, 6372/2919/2920/3576/6364/729230/56477/7852/6374/1436/3587/6347/7133/1236/635  
tags=48%, 3091/4794/5603/7097/3932/4792/3725/4773/917/915/919/2353/6774/4615/3460/6772  
tags=46%, 8519/4794/4792/5579/3725/5880/27071/4067/4773/975/2353/2213/29760/6850/5777/  
tags=39%, 2810/5366/896/891/894/317/51246/8797/1643/5054/841/64065/472/581/9134/6241/6  
tags=42%, 710/1191/715/11326/718/716/714/629/3684/713/3075/7450/729/2244/717/5329/3078,  
tags=44%, 3108/3109/3310/3115/6890/3119/3118/3113/5721/567/972/4261/925/3107/5720/3112  
tags=51%, 715/3880/3108/3109/2357/718/716/714/2212/3115/629/3684/713/3119/3118/3075/331  
tags=54%, 6372/3576/710/715/29108/5603/3725/718/6374/3394/716/714/3684/713/834/2353/231  
tags=65%, 6775/7097/3725/3108/3109/7100/3115/3119/3118/3113/3566/6774/3460/6772/3112/3

tags=53%, 65108/5603/7097/4792/5579/3725/3108/3109/718/4689/2212/3115/3684/3119/3118/6  
tags=55%, 5880/3108/3109/1525/3115/3119/958/3118/3383/3113/71/3107/3683/942/3112/841/3  
tags=32%, 2919/2920/3576/29108/7097/4792/7100/718/3310/3684/834/317/4615/841/929/3606/  
tags=50%, 3108/3109/3115/3119/958/3118/3113/3107/942/3112/3126/3105/3133/3134/3117/312  
tags=43%, 3576/7412/7097/3820/975/6347/958/2532/3383/7058/4615/3683/6403/3606/3689/229  
tags=48%, 56477/3108/3109/7852/10673/5284/3115/3119/958/3118/3113/608/3601/942/3112/31  
tags=56%, 3108/3109/3115/3119/3118/3113/5799/3107/942/3112/3126/3105/3133/3134/3117/31  
tags=59%, 3108/3109/3115/3119/3118/3113/3107/942/3112/3126/3105/3133/3821/3134/3117/31  
tags=69%, 715/87/3108/6737/3109/718/716/714/2212/3115/713/3119/958/3118/729/3113/2209/  
tags=62%, 3575/3932/64421/6890/958/915/4261/925/7535/29760/6891/5788/100/3543/916/8487  
tags=67%, 3108/3109/3115/3119/958/3118/3113/3107/942/3112/3126/3105/3133/3134/3117/312  
tags=60%, 51363/22856/55790/54480/64131/56548/50515/29940/113189/55501/126792/64132  
tags=70%, 3108/3109/3115/3119/958/3118/3113/2207/3112/3126/2206/3117/3122/3123/2205/63  
tags=76%, 4128/4282/10249/3242/221/137362/259307/6898/1644/4129/218/2805/5053  
tags=72%, 587/95/137362/3418/3420/2875/162417/48/51166/2805/84706/50/3417  
tags=71%, 18/5019/622/35/6296/39/3030/56898/1962/1892/2571/54988/79944/7915/3155/3033/  
tags=87%, 54658/54657/54578/54659/54579/54575/9104/54600/54577/54576/54490/9365/55586.  
tags=74%, 2643/248/5805/4337/10243/5092/873/1719/84105/250/8836/4338/6697/8644/5053/58  
tags=59%, 1738/5162/2271/6392/6389/3418/3420/4191/6390/5106/48/4967/8803/8801/8802/50/  
tags=72%, 1738/6470/39/847/6472/81888/4191/51179/189/132158/48/5096/54363/84532/55902/  
tags=68%, 18/221/35/1807/51/3030/1962/223/4329/1892/2571/51733/501/84735/218/26275/219,  
tags=83%, 18/35/1738/160287/39/1629/3945/51/3030/1962/594/4329/1892/79611/55862/5096/8  
tags=50%, 95/137362/2747/2875/4843/445/162417/2746/2805/84706  
tags=67%, 26/138199/223/4129/501/10841/84735/3176/218/144193/219/217/224/443  
tags=64%, 1738/160287/5162/39/2271/3945/10873/223/4191/5106/501/84532/32/134526/55902/  
tags=61%, 316/4128/220074/4282/3242/221/7306/137362/259307/6898/1644/81889/130/4129/54  
tags=71%, 5224/55349/1738/6470/51268/6472/10993/212/635/23464/2628/5723/189/4129/13215  
tags=40%, 39/1056/80168/2169/337/50487/2168/335/81579/84649/5407/84647/4547/38  
tags=47%, 8659/137362/259307/2747/2571/2875/445/56954/189/8528/2746/2346/2805/7915/847  
tags=50%, 8659/137362/26/2628/5831/223/4942/4843/4129/5625/501/113451/1610/84735/2593/  
tags=68%, 169355/316/4128/883/1738/39/847/259307/26/3030/1644/1962/55526/223/1892/2349  
tags=69%, 33/1632/2181/1376/35/126129/39/3032/51/3030/1962/223/1892/130/2180/501/2639/8  
tags=70%, 4143/51074/58478/4190/2937/2730/4548/113675/4507/64902/883/7263/4357/4144/58  
tags=78%, 18/197322/5019/587/35/1738/27034/39/259307/3032/1629/64087/3030/1962/11112/2  
tags=51%, 5213/221/5224/9562/1738/160287/5162/80201/3945/2645/223/5232/229/130/5236/10  
tags=39%, 1738/51268/39/9757/5351/3030/55217/1962/55526/10919/223/1892/501/2639/123688  
tags=65%, 9374/9415/9524/54898/84869/23205/6785/8310/23305/6319/6342/33/2181/1376/1973  
tags=31%, 482/358/5568/760/114/57835/115/10864/9376/2052/8431/9429/107/200931/6256/109  
tags=53%, 23205/8310/23305/5468/5467/336/2170/6319/6342/11001/33/2181/1376/5465/126129  
tags=72%, 3270/7169/4633/4625/10345/487/59285/4624/785/7137/845/6547/779/1346/1337/782  
tags=46%, 528/526/1211/51382/22999/90423/23025/245972/6534/6540/6505/6512/6538/773/570  
tags=51%, 390063/8392/4993/805/143503/81472/79339/808/1258/156/282763/26211/26248/1388  
tags=69%, 8310/23305/7498/8800/196743/5825/5193/390916/4598/255027/6342/11001/5194/831  
tags=43%, 4144/5213/587/5224/6470/95/137362/6472/3418/10993/27430/3420/5831/5232/5723/  
tags=62%, 51079/56901/528/526/55967/125965/7381/495/51382/4711/7384/4696/90423/374291/  
tags=31%, 3918/3575/1284/3694/9586/7097/3371/4609/9180/3685/1436/896/3455/4254/3574/74  
tags=38%, 4144/3242/587/1738/2643/248/6470/5805/124454/6472/11019/7390/212/4337/10243/  
tags=55%, 5213/5224/35/1738/6470/5162/39/2271/847/137362/6472/6392/6389/80201/2747/51/  
tags=31%, 3554/5603/5579/3725/5880/4609/10235/784/3310/1436/4254/6237/5922/1848/1847/2  
tags=41%, 55967/6720/51422/125965/7381/4711/54205/3952/5465/7384/3630/4696/374291/153/  
tags=45%, 51079/56901/10681/3708/2563/55967/3709/4711/22999/2915/747/2560/4696/374291/  
tags=37%, 330/29108/7128/6775/10379/3455/834/6774/1536/3460/8797/11035/6772/841/6778/5  
tags=28%, 1906/3554/7412/5603/3725/5880/2950/3685/6347/3383/653361/2353/6613/71/3690/4  
tags=33%, 2810/4609/5925/3065/896/891/8317/894/4174/994/4171/890/8379/9232/4087/10926/  
tags=30%, 3575/3976/6775/4609/9021/9180/1438/3587/10379/896/3455/1439/3574/3566/894/67  
tags=37%, 3576/5603/4609/4773/10758/5925/3710/896/891/6237/83593/894/3107/22808/5054/3  
tags=47%, 3310/9416/55119/29896/9343/6628/1659/6430/10262/6626/10189/9775/23450/55110/  
tags=42%, 51422/125965/7381/353500/5606/4711/137682/2181/1376/7384/4696/374291/1537/10

tags=33%, 5603/5332/10235/4067/64805/3710/2212/3937/7450/6916/2776/71/2244/3690/2207/5  
tags=41%, 51079/56901/10105/3708/5683/4128/6622/808/5718/55967/7314/5708/125965/7381/5  
tags=31%, 7416/5731/5568/91807/6915/2246/51196/773/55283/5336/816/2902/292/2254/801/11  
tags=26%, 3918/1284/3694/3371/3685/961/7450/1286/3915/7058/1282/375790/3690/3675/3696/  
tags=45%, 4792/4609/5925/3065/1643/867/1488/581/9846/5594/3845/10000/5970/7157/6776/10  
tags=41%, 146/2488/2358/7349/3952/2915/5644/727/2560/9038/1145/153/2918/2912/51052/181  
tags=33%, 10105/3708/146754/5683/6622/8326/808/5718/324/53349/55967/7314/5708/1768/125  
tags=59%, 10654/91734/23463/9986/4598/23590/39/79947/4597/57107/3422/51449/38  
tags=25%, 3091/3059/7474/5603/7097/5579/4609/967/2535/406991/3685/3710/6237/2247/6774/  
tags=63%, 528/526/495/51382/1188/90423/245972/760/535/496/534/155066/529/525/245973/65  
tags=65%, 805/808/1258/3000/6010/2978/801/5148/91860/2779/6011/2979/810  
tags=77%, 54658/54657/54578/54659/54579/54575/6120/729020/54600/54577/54576/54490/936  
tags=38%, 196051/64900/1056/80168/253558/223/1607/56894/4023/132158/10327/84649/501/5  
tags=34%, 3059/10109/10095/9844/71/391/60/867/10094/10163/7414/63916/2335/8503/10096/9  
tags=33%, 10105/3708/5683/6622/8326/808/5718/324/55967/322/5708/125965/7381/5715/5705/  
tags=35%, 51079/56901/10105/3708/146754/5683/5718/55967/1211/5708/1768/125965/7381/57  
tags=53%, 2947/54600/2953/2944/4257/54577/54576/4259/316/4128/2330/1558/1549/54490/221  
tags=26%, 3694/87/10109/5880/7852/3685/7114/10095/3684/6237/2247/71/3071/3690/3675/368  
tags=37%, 3091/3725/2113/3082/5594/3845/10000/7428/5062/5063/1026/8503/5908/6513/9915/  
tags=38%, 4609/1436/3684/1848/2209/6774/929/890/5594/3845/10000/6932/5970/6776/597/537  
tags=29%, 5603/5880/241/4067/3937/2207/5321/27040/6850/2206/9846/5594/7409/2205/240/38  
tags=70%, 54658/54657/54578/54659/54579/1577/216/54575/51109/54884/157506/5959/54600/5  
tags=39%, 1906/1284/5603/9586/5332/4792/3725/1286/2353/1282/1910/2790/4312/4087/59/601  
tags=37%, 9586/4792/2950/5925/5156/6692/5154/7184/9134/5594/64764/3845/10000/6932/1385  
tags=29%, 29108/4792/3665/834/9447/6352/11035/3606/23586/103/3553/5970/3551/9641/6351/  
tags=36%, 5603/5332/5579/4363/5880/91012/130367/2776/2207/140/2206/1901/10672/581/8877  
tags=38%, 6613/29107/387082/1973/23191/79902/8672/10250/11171/96764/53371/55706/13243  
tags=57%, 775/50834/6338/80835/954/8645/3351/9568/5726/170572/9033/5568/773/114/255022  
tags=55%, 316/23408/56953/133686/83594/5169/4860/23530/4907/23475/93100/54981/683/554  
tags=67%, 23438/57505/54938/55278/123263/10352/118672/55157/124454/55699/79731/57038/  
tags=33%, 7474/10509/5880/7852/4773/8829/6237/10507/2051/1945/1072/1969/1946/10505/398  
tags=45%, 587/5169/1807/51733/79717/53354/219/217/224  
tags=50%, 8029/5948/337/335/9963/6573/2346/25974/113235/686  
tags=48%, 2947/54600/2953/2944/4257/54577/54576/4259/1549/54490/8574/221/1548/22977/29  
tags=31%, 3576/5603/4792/3665/54941/4214/841/7187/23586/9636/338376/5970/8772/3551/964  
tags=48%, 8704/2524/53947/6487/28/2651/2528/10402/2525/8702/2529/2527/79369  
tags=64%, 205/79178/248/52/84284/250/204/9054/249

09/2535/10235/7852/2950/3685/1438/650/1436/5925/3065/896/3455/4254/1439/3574/1286/8359  
39/10308/3113/6352/567/317/972/3690/4615/3107/3460/6772/6672/3112/80264/841/389114/689  
1286/894/3915/7058/1282/3690/3675/3107/6772/841/3696/4599/3105/3676/3659/3133/890/8032  
138/650/10673/1436/3587/23765/6347/3455/3624/958/1439/7133/3574/1236/9235/3566/6352/63  
'/834/388/9844/6281/9266/2353/71/23643/3071/4615/399/203068/8797/11035/841/929/3606/391  
7058/1282/71/3690/3675/7408/3696/3676/60/5156/2316/5154/3911/5500/55742/3082/7791/4638  
890/6347/6352/567/2776/6774/1234/3690/3107/841/6891/3105/3133/2790/5156/811/3134/113/1  
9/958/3118/1958/3383/915/3113/706/894/567/2353/3601/5971/3107/4214/3683/3112/3126/3105  
834/6352/9844/9266/71/4615/7322/929/3606/5216/60/8767/837/114548/960/472/7188/10094/58  
/713/8829/6347/3455/834/7450/729/4939/2353/6774/6868/200916/6223/2244/1536/4615/51311/  
'/71/3690/2903/3683/1945/22808/51466/54518/51735/7408/5216/60/5900/3689/27040/5156/196  
115/6890/917/3455/3119/958/3118/3383/4939/915/3113/919/894/567/317/6774/4615/5971/3107  
)95/2212/64005/834/4542/9266/2353/55971/71/3071/4615/203068/8797/4642/841/3606/6188/60/  
06/915/919/567/2776/2353/1234/4615/3107/85363/841/6891/3105/3133/60489/1072/2790/811/8  
1067/6374/6347/3702/1236/653361/6352/6368/9844/2776/6363/6774/10563/1234/6366/1794/677  
455/3383/2247/2353/6774/1234/3107/6772/942/841/3105/3133/7187/2790/6850/3055/3134/7538  
.8/3113/317/2209/972/4261/4615/3460/6772/2207/1263/4360/2213/3112/841/929/3606/3126/910  
1/2776/2353/71/4615/925/7535/3606/391/3676/60/27040/114548/10094/51135/5594/7409/10163/  
5/3119/3118/834/3383/4939/3113/6352/317/8766/71/4261/4615/3460/8797/6772/3112/841/3606  
0/9451/1520/84790/1616/472/581/5594/332/4170/3845/10000/8743/836/4217/3002/5970/7132/3  
786/7078/5156/1946/54541/960/23405/27086/5154/472/3925/1788/2146/7431/9839/9134/5594/4  
6347/3455/834/4939/9447/114769/6352/84674/10135/1536/4615/11035/6772/841/10628/3606/8  
1234/3107/7185/6672/841/3105/3133/890/9734/7187/8379/6850/5315/3134/85477/7188/581/753  
/6774/4615/6772/2213/841/4478/4599/9451/4600/7187/23586/868/3560/581/51135/9134/10399/  
07/7535/3105/3133/3689/27040/22914/6850/3821/3822/5777/5594/7409/3824/3135/2215/3845/4  
'/3455/653361/2209/2353/7305/3726/3690/5971/3460/6772/2213/29760/4688/9103/6850/814/108  
8/79679/3383/3113/925/3107/3683/6403/942/9019/3112/3696/3126/3105/3676/3133/6404/5788/  
'10312/3119/3118/653361/3113/7058/2209/71/1536/3690/3107/203068/4360/2213/3112/929/689  
1/4599/9451/4600/7187/23586/581/7534/7533/5594/8554/3845/10000/836/5970/7132/355/7157/  
64/2120/942/7185/1643/604/929/25942/890/4297/4300/6692/5154/472/2005/51274/3560/581/32  
.072/5321/27040/6850/3055/3985/85477/10094/8877/9846/5594/7409/50807/10163/2215/10000/  
15/4214/6772/1643/841/6778/890/7187/23586/581/51135/7534/9134/5594/64764/1959/332/3538  
71/1536/399/3683/7408/4478/4688/3676/60/3689/7409/2770/50848/6494/10627/7414/2771  
47/7133/3383/6352/2353/1326/3726/11035/7185/841/3659/7187/197259/64127/8809/7188/6401/  
15/3460/5054/841/4087/811/51135/5594/2770/916/10000/3553/2771/5970/7132/355/8503/7046/  
4/23643/1234/4261/4615/3460/6772/3112/841/3126/3117/3911/51135/3122/5594/3914/2770/312  
/3113/919/3566/2353/6774/9466/3460/6772/7535/3112/6778/3126/27040/4087/3117/3560/3122/  
27040/5777/868/8440/5594/7409/10125/916/3845/10000/5062/5970/5063/8503/1493/29851/3551  
643/4615/5971/6366/7185/7535/29760/929/27040/7187/6850/23586/472/7188/51135/353376/408  
51311/6772/942/841/929/7187/51135/5594/7096/6696/353376/10000/3553/5970/8503/7098/877  
207/1263/841/3659/6850/114548/868/5594/1959/3845/10000/3553/5743/5970/1960/8503/3551/96  
2776/1282/929/913/3689/3911/3914/3553/836/7414/5970/10319/5869/2335/8503/7850/735/7099  
'3118/3574/915/3113/3566/2209/3690/925/3675/3112/945/929/913/3126/3676/931/951/960/3117  
772/5054/4087/581/6401/5594/3845/10000/3553/836/5970/7056/6776/2335/8503/7046/3552/230  
3/841/6280/7187/4312/7188/7184/5594/3727/3553/836/5743/6279/5970/6356  
/3566/2353/3460/6772/7535/3112/6778/3126/27040/864/3117/3560/9794/3122/55534/5594/3128  
8/3911/581/9134/3914/10000/836/5743/5970/10319/7157/3673/5728/1026/2335/8503/1871/3551  
)3118/3383/3113/6352/2353/3683/942/3112/3606/3126/3689/4312/3117/3122/3123/4050/3553  
52/6368/6363/10563/1234/6366/8797/5197/1235/3606/51554/8809/3560/6846/1524/3570/6375/8  
/7535/27040/5777/55509/29126/5594/10125/916/353376/3845/10000/5970/10538/5728/4215/85  
'10859/5594/7409/3845/10000/118788/3635/5970/11006/8503/10288/3551/5534/930/4790/4893/  
4393/8493/11200/836/355/7157/637/5728/1026/92344/8795/1021  
/5054/2/3689/3080/2266/10877/1604/966/7056/730/10878/720/721/728/735  
/6891/3126/3105/3133/1520/3309/811/3821/3822/3134/3117/10437/3122/3123/3824/3135/3106/  
83/3113/2209/3875/717/3683/6403/2213/3112/3126/6404/9103/25984/3689/2266/3117/2359/312  
643/4615/717/929/3659/3689/1072/114548/51135/5594/2770/10392/353376/3553/836/2771/5970  
606/6778/3126/4087/64127/8809/3117/3122/3123/2625/3553/3594/8807/5970/3552/7099/7042/7

53361/3113/2209/2353/1536/4615/3460/6772/3112/4688/3126/3676/9103/3689/5777/3117/5113/  
126/3105/60/3133/3689/3134/3117/8672/3122/1604/3123/3135/3106/836/5551/637  
3689/1937  
2/3123/3135/3106/3002/355/5551  
14/3082/6401/2995/3553  
26/3676/3117/3122/3123  
22/3123/3135/3553/3106/3002/355/5551  
22/3123/3824/3135/3553/3106/3002/355/5551  
717/2903/942/3112/3126/3117/6628/3122/3123/2215/730/720/721/735/2214/733  
6/3718/29851/5993/920/930  
2/3123/3135/3106/3002/355/5551

56

38  
/223/10327/501/2990/219/217/224  
60/249  
3417  
9380/275/2653/50/84693/38  
/217/224  
4532/32/55902/26275/8803/8801/8802/84693/38

5313/9380/219/217/197257/224/38/3029  
109/218/2184/2805/1621/128  
58/29968/501/1491/1610/29958/2593/9380/275/2653/1757

706/443  
79814/58510/2805/112849/219/217/112483/224/8974  
8/4129/501/8942/2639/51166/219/8564/217/3033/224/38  
31616/128/219/10449/217/30/10455/3033/224/36/34/38  
37/160287/23743/137362/259307/3945/6898/10993/635/27430/191/4191/29968/23382/1491/2729  
23/594/4329/1892/501/5096/549/56922/26275/219/10449/217/30/3155/3033/3712/224/84693/36  
327/2203/5106/501/84532/55902/218/5313/2538/128/219/130589/217/224  
384787/9739/51166/219/217/3033/224/38  
322/35/126129/39/3032/7923/51/3030/1962/27349/1892/54995/2180/60481/81616/51102/10449/  
98/6580/6555/123264/3781/1244/1576  
3123/2169/51/1962/10873/2168/335/2180/4023/116519/5106/1593/81616/6256/364/2710/10998/  
/23439/1340/9167/1339/775/84701/778/7134/27092/125965/7381/93589/444/786/7384/1537/482  
30/6530/10497/10814/594855/535/160/534/6511/6532/155066/529/525/245973/127124/6809/58  
304/3000/26658/26740/158131/5568/816/26476/26689/801/4992/26664/81285/79541/91860/815/  
594/2181/5189/215/5052/5824/51268/847/10005/5826/2053/55825/51/3418/11264/1962/5191/92  
2875/445/229/29968/162417/1491/48/5313/2805/5053/84706/50/3417  
1537/10975/4728/245972/7385/64077/6392/6389/4709/4700/4720/9377/7386/4716/4701/535/49  
50/1286/3566/894/3915/7058/2247/1282/3690/3675/1945/3696/3676/374/2790/5156/1969/6850/  
2235/27430/23475/1719/4522/4351/54995/9249/23498/250/204/8836/55163/93100/10327/4338/  
3418/3030/10993/1962/3420/10873/2645/4329/5232/5723/1892/2875/4191/51179/229/189/13215  
247/2353/1326/4615/994/5971/4214/1945/22808/929/374/5321/6789/5156/1969/1946/11184/161  
7/10975/4728/7385/6392/6389/4709/4700/6945/4720/9377/7386/4716/4701/4704/51094/4712/47  
4728/3763/5568/4709/773/4700/4720/57030/114/4716/4701/115/5330/4704/4712/4713/3760/47  
321/197259/114548/7188/581/353376/55072/8743/3553/29082/7132/355/6776/5834/637/823/37  
688/60/387082/4205/5154/7184/6385/1843/6401/10000/3553/4217/5970/7056/7132/7157/659/85  
7272/472/7534/9134/7533/991/23594/11200/7157/4172/1026/1871/996/7529/4175/4176/1021/10  
74/3601/9466/3460/6772/6778/10401/5156/5777/5154/3560/5771/3570/8554/4170/8651/10000/3  
105/3133/890/2113/677/4087/3134/472/5500/9134/5594/3135/3845/10000/3106/11200/5970/715  
10946/51690/151903/8175/10915/220988/3178/10450/4116/6633/6632/57819/25949/23350/7307  
3975/29078/91942/2475/4728/126129/7385/5568/6392/6389/10818/4709/4700/4720/55811/6009/



4518/7408/83706/60/5321/2266/6850/113/10672/5500/5742/4638/5594/2770/10125/10627/10000/5715/5705/3709/81027/4711/54205/5694/7384/4696/5717/374291/1537/10975/4728/5701/7385/74/3360/488/4914/26291/155/5737/8911/8822/115/2064/8913/5330/3363/5733/291/1956/3361/293676/960/3911/6385/3914/6696

26/8503/1871/7046/3551/1021/7042/7040/4790/4893/4193/5293/2122/4616/4089/208/578/613/65/3640/553/3972/5697/9294/11255/1135/1392/5731/6752/5020/2692/6915/8973/2688/2689/29025965/7381/5715/5705/3709/4041/5606/81027/4711/25981/54205/2915/5694/27123/5861/7384/46

71/10855/3690/5329/22808/4060/4478/60/80326/7078/4087/960/1839/867/5777/2316/5500/638521/127124

5/51084/6652/10327/2990/51181/9942/27294

7104/2710/5407/219/217/224/80339/26007

99/3678/858/3611/5293/4233/857/10093

3709/4041/1147/81027/4711/54205/2915/5694/27123/57142/7384/3630/4696/5717/7855/374291

15/5705/81027/4711/25981/54205/2915/5694/7384/1387/5432/4696/5717/374291/1537/10975/24

1/1548/2326/2948/130/2329/4129/1565/2938/9446/1555/218/128/4258/2940/1576

3/22808/4478/3696/5216/3676/60/3689/1072/5156/23191/3985/5154/85477/10672/5500/10094/405/7042/2033/7040/7030/7039/4893/5293/4233

1/8503/3551/7704/4790/11040/3728/862/4893/5293

45/10000/3635

54577/53630/1562/54576/316/1558/1549/54490/56603/1548/8228/54905/9249/130/1555/8608/12

9/113/54331/5594/64764/2770/408/3845/10000/2782/2771/1385/5970/8503/7046/7040/4790/128

5/5970/7157/367/5728/1026/8503/1871/7850/2308/3551/2078/2033/4790/2119/7039/4893/4193/54790

7/9846/5594/2770/2205/1903/3845/10000/8879/2771/5529/4217/5970/7132/7157/637/5728/8503/

0/10189/10762/9775/7514/26986/55110/10460/9688/8021/7329/9818/9631/22794/79228/5903/54

2/5330/2911/1131/3355/2914/5153/2784/3354/6335/3352/22953/6337

235/349565/23410/23409

10667/80222/51091/5188

35/8440/1808/6091/23380/5594/2770/6586/6469/5998/2242/3845/10627/57556/2041/29984/1942

948/873/130/1565/2052/2938/9446/1555/218/128/4258/27294/1553/2940/1576

11/7706/4790/1540/10010/64135

3/23401/3566/894/3915/2776/2247/317/2353/6774/3601/1282/3675/3460/6772/7185/1910/1643/  
1/3126/94039/3105/3133/9451/7695/148156/7187/146198/54811/6850/811/58500/79088/3134/2.  
6/4600/7187/5315/3134/472/3911/9636/581/9794/9134/55534/5594/64764/9519/3914/6696/313!  
38/608/6363/3601/10563/1234/9466/6366/3460/8797/5197/1235/3606/3603/939/51554/8809/951.  
/5216/6188/60/5788/8767/197259/23191/837/114548/84790/2316/7184/10094/581/84617/51135.  
/5594/7409/3914/6696/10627/10000/7414/5062/10319/5063/3673/5728/2335/8503/5908  
0672/7188/54331/581/5594/64764/3570/5732/2770/11214/3135/3845/10000/2782/3553/3106/83!  
/3133/890/2113/3689/8379/9232/4087/811/2114/3134/113/3117/472/7538/2005/3560/200186/58  
1/5594/10163/10392/55072/10627/10000/3553/3098/7414/26100/826/9252/5970/7132/7157/639:  
717/6403/6772/4599/6188/6168/6202/4600/7187/4312/2266/6850/114548/23521/1839/2197/235!  
3/1946/113/5154/9771/3082/5594/23683/7409/1902/2770/6494/3845/10000/9170/1942/2771/557.  
/3683/6772/1643/29760/3112/841/6891/3126/3105/25942/3133/890/7187/864/6850/811/953/960  
'23191/4641/837/114548/84790/5777/10972/10672/8440/10094/581/84617/51135/5594/1902/101  
905/3134/3985/472/7188/54331/581/51135/27350/684/5594/2770/916/3135/3845/200316/10000/  
2/5197/1235/2268/2790/3055/113/54331/6846/1524/5594/7409/2770/408/6375/10663/3845/1000  
3/54331/581/5594/3135/3845/10000/2782/6932/4277/3106/836/5743/1385/5970/7132/355/7157/1  
3/8767/3689/1520/6850/64127/3117/581/8877/51135/3122/5594/7096/3123/2215/10000/3553/8:  
'10000/3553/5970/63916/2335/8503/10096/3551/7099/9815/148022  
3/4599/3126/29107/60/4600/7187/5611/114548/23586/64499/3117/581/51135/3122/5594/3123/7:  
55/7157/4000/5551/3563/637/823/597/8503/8772/824/1509/3551/8795/1519/84823/142/9020/47!  
1170/3845/8651/1942/836/5743/1789/9252/7329/7157/5728/659/1026/8503/1871/4853/90427/35!  
767/7187/837/114548/64127/7188/51135/5594/115362/10392/7158/55072/3553/118429/22900/59  
4/9134/7533/5594/64764/1959/9519/991/3135/3845/3106/836/1385/5970/7157/6776/1026/1960/  
'916/6504/103/10000/3553/836/5970/355/7157/6776/27102/637/8503/3718/8772/3552/3551/7099  
1068/8743/3384/4277/3106/836/3002/355/5551/637/8503  
359/9846/5594/3727/4982/2215/8651/10000/3553/1385/5970/7132/11006/8600/8503/10288/7046  
'3689/57502/3134/3117/6385/3122/6401/29126/5792/50848/3123/3135/6614/3384/3106/3897/92:  
1/4688/3126/3105/60/3133/9103/3689/1520/811/84790/3134/3117/84617/3122/9146/3123/3135/!  
'27102/637/1026/8503/1871/6041/7098/7529/8772/3551/148022/1021/9641/10971/5610  
06/55589/2313/4086/3002/5970/5079/7157/597/1026/2530/5371/5090/6667/7850/2308/9915/421  
3635  
376/3845/10000/836/1385/5970/355/7157/6776/637/1026/1960/8503/1871/7046/3718/7098/7529/  
  
'5594/64764/10000/3553/836/5743/4217/1385/9252/5970/7132/355/8503/4323/8772  
8772/3551/7099/148022/7042/624/7040/4790/5293/6348/6349/414062  
3/240/8651/10000/836/2771/5970/10319/7132  
'5594/3570/3123/916/2625/3553/3594/5970/6776/7046/3572/3718/3662/3551/920/5534/7040  
/920/5534/9020/4790/5588/4893/5293  
50/3553/5743/5970/7329/7132/8600/597/23085/3551/7099/148022/6351/6357/7706/142/9020/47  
2/3551/7099/148022/9641/6351/6373/4790/5293/6348/6349/414062  
341/5534/9020/4790/1540/4893/4193/5293/30835/602  
'3908/733/7042/7040/4790/1281  
'3122/1604/3570/3123/916/3553/966/952/3563/3673  
8  
  
3/916/2625/3594/5970/6776/4853/3718/3551/920/5534/182  
/3908/1021  
  
743/8807/7132/6356/3572/3588/8795/6351/6373/6357  
3/3551/7099/148022/920/5534/4790/5588/4893/5293/1460  
5293/971/11027/11025/208  
  
'1385  
2/3123/2215/3872  
3/720/721/3552/7099/148022  
'040/4790/50615/30009

5/3122/5594/3123/2215/3553/5743/5970

/2805/55256  
/34/38

30/3033/36/34/38

'30/8309/34/345  
'/10975/7385/4635/4634/9377/7386/488/27091/783/1350/1351/1329/1349/27089/7139/29796  
64  
'5153/26716/2788/7932/126370/83988/818/810  
960/1891/4843/51179/2180/189/26063/283927/8528/1610/54363/5827/26061/5830/6647/30/3155  
6/534/4704/4712/4713/4723/479/4714/4724/155066/529/525/4722/245973/6390/4715/127124/47  
'1946/54541/5154/4602/3911/3560/7184/54331/200186/3082/7534/9134/7533/5594/64764/1902/3  
29968/8942/6697/9054/2729/79717/51805/2990/5313/554235/84274/53354/1723/219/8564/217/5  
58/6390/29968/2203/48/5096/2746/54363/84532/4967/55902/5313/2805/26275/8803/128/275/265  
.6/2316/5154/3925/2005/1846/1850/3082/1843/51135/5594/3727/408/10125/1844/3845/10000/15  
13/4723/4714/3643/4724/4722/6390/4715/4705/4731/1350/1351/4694/4702/2931/1329/5313/625  
23/2911/4714/4724/2166/4722/2784/2892/4715/2788/4705/4731/2570/4694/107/4702/57406/630  
18/5836/7098/8772/10616/3552/824/8795/7099/148022/5610/142/8605/2752/1540  
503/7850/3552/2952/3551  
'971/7042/2033/7040/6502/29945  
'594/338376/6776/3563/1026/8503/3572/3718/85480/3588  
'7/5728/823/1026/678/8503/1871/7046/2305/3552/2308/824/1021/7042/5534/7040/90550/20485  
'/3192/51645/494115/23020/27339/2521/10285/8559/4686/57461/9410/7919/58517/9129/27316/  
'6199/9377/7386/114/26291/4716/155/4701/115/4704/4712/4713/25915/4723/3991/4714/4724/21

J/2771/84876/3673/5584/8503/5908  
416/5568/9927/6392/7326/6389/147700/4709/4700/816/4720/10131/292/9377/801/7386/4716/47  
25/2911/91860/887/4843/1131/2250/2905/219931/5260/3274/815/5153/84812/56848/3362/107/3

73  
2/1136/7434/117579/3360/4543/256933/165829/155/5737/83551/3363/5733/3361/2925/113091/5  
96/5717/7855/374291/1537/10975/2475/4728/5701/7385/7416/6712/847/5621/9927/27035/6392/  
5/3082/8826/5594/7409/6469/3845/10000/836/7482/355/7157/3673/2066/1026/2335/8503

/1537/10975/2475/4728/5701/7385/7416/27035/6392/6389/147700/4709/4700/4720/2902/292/93  
75/4728/5701/7385/3766/7416/6392/1742/6389/23186/147700/4709/4700/4720/2902/292/9377/7  
1638/8826/5594/7409/1902/10163/3845/10627/9170/54961/7414/5062/55740/5063/3673/2335/85

8/145226/10901/317749/1551/1576  
31/2791/4893/2783/5293/10488/111/1285/208/109/1288/112/1278/4313  
5293/2260/5159/10488

/5525/1509/9517/624/8439/8560/4790/4893/5293/259230  
1960/80336/4116/10482/3837/57510/10921/2521/9669/8761/4686/1207/7919/8664/1968/79760/2

/54961/2048/2771/3897/5062/55740/5361/5063/57522/659/8503/5163/7220/59277/91584/2047/6

/841/6778/890/2113/80326/5900/7187/2790/4312/6789/4087/5156/867/113/1488/5154/10672/718  
3586/1616/3117/7188/5500/7694/136051/581/51135/6430/65243/90649/3122/51427/684/146540/  
5/3845/1741/10000/6932/3280/26508/8638/3106/836/5743/5529/7482/1385/5970/10319/7132/35  
8/3560/6846/1524/3570/4982/6375/10663/8771/4050/8743/3553/3594/944/338376/8807/7132/35  
/5594/23207/10392/10627/10000/6932/8743/3553/836/5970/7132/63916/5063/29109/5869/27072

3/5743/2771/1385/5970/7132/355/7157/637/1026/8503/1871/6667/8772/3588/3551/1021/6351/5!  
1/9134/3122/5594/64764/1959/9519/3123/991/916/3135/3845/10000/64784/3106/7514/11200/13  
16/11337/823/8503/10096/10616/23048/2308/9265/824/3551/7099/7321/4671/9181/831/4790/10  
36/9636/51135/6146/5594/3570/103/3553/6158/5970/730/7132/11224/25873/8503/6187/6229/35  
40/57568/5584/135/8503/10636/25865/5908/8631  
/3134/23586/3117/7188/9636/7431/581/51135/9134/3122/3123/5713/916/3135/10000/3280/3106  
.63/9170/8743/3553/836/4644/5062/5970/7132/355/5063/9871/10096/8772/9265/3551/8795/7099  
'2782/3106/836/2771/5062/5970/7132/355/5063/637  
0/2782/2771/5970/6356/8503/3718/5908/57580/3551/6351/6373/6357/4790/7074/2791/56288/63  
11337/637/1026/8503/1871/3572/7098/57580/8772/3551/9976/148022/1021/9641/5610/5534/203  
36/1385/5970/7132/637/5869/8772/3552/3588/1509/2214/7099/5993/7042/5534/2033/7040

177/3838/103/10000/8743/3553/7514/836/11100/5970/7132/355/637/5371/8503/6041/7098/8772  
90/1522/4893/5293  
51/6624/1021/7042/2033/4790/4194/3678/5598/4893/4193/9759/5293/4233/5159  
970/11337/6041/8772/10616/3551/7099/148022/9641/2633/4671/9051  
'8503/3572/3718/7529/1021/10971/5610/2033/6502/4790/4893/4193/9759/5293/3516/10488/2968  
)/1021/9641/5610

/3552/3551/2214/7042/5534/7040/4286/9020/4790/1540  
3/9369/1493/29851/5819/201633/920/5175/4267/999/23705/8516/23114/83700/80380  
2215

11/2078/4286/7704/7030/4790/8148/2119/3728/862/4193/4233/2521

/8772/3551/7099/148022/9641/10971/7042/2033/7040

90/1540

5/10455/1384/10901/5264/8309/3417

'05/4731/1350/1351/4694/4702/1329/4697/1349/27089/4717/4695/29796/4706  
3570/3914/6696/4170/3845/10000/118788/2782/9170/1942/5529/1385/5970/10319/7157/3563/36  
i7026/145226/51004/349565/224/249/210  
53/4524/8801/84706/8802/50/84693/26007/414328/38/3417  
942/3553/55799/836/5062/4217/9252/5970/7132/355/7157/2066/11221/4915/4215/7046/5908/35  
i6/4697/1349/27089/4717/4695/51085/29796/4706  
0/5582/4697/4717/4695/4706

1/4790/4893/4193/5293/55957  
3183/144983/6427/9716/57187/22827/51691/6431/3190/25766/1655/6432/3304/4670/6428/6636  
l80/4722/4878/6390/7248/4715/388753/285521/4705/4731/1350/1351/4694/107/4702/57104/132

'01/4704/291/4712/4713/4723/4714/91860/118424/4724/815/4129/4722/51807/6390/5693/4715/4706/2251/5582/340156/147/22953/56413/818/53373/8912/7423/7422/810/1950

7053/90226/2911/64106/1394/23566/887/1131/6755/5645/2905/2831/3355/5443/3274/3827/1146/1742/7326/6389/147700/4709/4700/816/4720/342371/2902/10131/292/9377/801/7386/7473/841/

77/801/7386/7473/488/5664/4716/50507/4701/5330/4704/348/291/4712/4713/7472/55062/4723/7386/4716/10540/4701/5330/160/4704/10120/291/4712/4713/9001/55062/4723/4714/10671/4724/03/1730/10096/221178/9459

3435/3646/10799/8563/4928/8666/51808/9972/1965/57187/8663/6612/8665

259/5534/1948/103910/56288/3983/4893/3611/5293/4233

38/3911/3560/7184/54331/581/3082/9134/5594/1902/3570/3914/5732/2770/332/10125/6469/384  
/81931/84914/3123/10224/3135/7752/7700/91975/10189/10000/163227/339559/162966/3553/755  
5/7157/3673/5584/5728/1026/10134/2335/8503/4853/7098/8772/5525/8324/2308/1293/3551/390  
5/6356/3563/8600/659/7046/3572/94/7850/3552/85480/3588/8795/1441/6351/6373/7042/920/63  
2/8655/10096/64837/8772/9265/3551/8795/7099/4671/51626/347688/4790/103910/4074/5287/55

534/4790/2791/5734/6376/4893/4193/2783/5293/6348/6349/414062/10488/111  
385/5970/7132/7157/6776/5728/1026/4215/8503/1871/7046/3718/996/6513/7850  
3910/7307/3678/5588/7335/4193/3611/5293  
72/720/721/728/7098/6175/735/6193/6181/6169/3551/7099/9641/733/5610/6157/6142

3/836/5970/355/7157/637/8819/1026/8503/1871/3718  
3

376/4893/2783/5293/7454/6348/6349/414062  
3

/3552/3551/8795/7099/148022/1021/9641/5610/2033/10482/7706/8106



73/2066/5728/4915/1026/2335/8503/3718/7529/10161/5525/1293/3551/7099/3908/1021/10971/1

52/9448/3551/7042/2323/5534/7040/57551/8605/9020/4790/8569/5598/7039/100137049/4893/42

9/79133/8110/6300/493753/4697/84987/1349/65260/27089/788/4717/51287/4695/51103/29796/4

1705/4731/79861/1350/1351/4694/4702/1329/1813/4697/1349/27089/818/4717/65018/4695/2979

3/2914/1144/2147/2642/2892/3354/2696/2901/6753/5646/7442/2570/3362/187/4985/5340/1141/1  
34/488/5664/4716/10452/10540/50507/4701/596/5330/4704/10120/291/4712/4713/7472/9001/55

'4714/91860/177/4843/7480/1131/3643/2905/4724/4023/4722/51807/6390/5693/4715/10297/470!  
/4294/4722/51807/2892/6390/196385/5693/4715/4705/4731/79861/1350/1351/4694/4702/27113/

5/10000/2782/6932/10023/3280/9170/26508/7428/836/3594/5743/2771/7482/9252/5970/10319/3  
34/3106/63934/836/10838/81856/90321/55769/79230/25799/7551/5970/115509/7132/90338/7743  
08/148022/1021/9641/5610  
57/7040  
770

l441/8115/2323/930/4790/2791/8516/3678/7039/4893/4193/2783/5293/4233/2260/2252/5159

233/2260/2252/5159

6/810/4137/4706

l325/1813/7067/1137/1443/5618/3352/147/22953/56413/2740/133/8862/7068/151/2690  
062/4723/2911/4714/91860/177/4843/7480/1131/10671/118424/2905/4724/815/4294/4722/51807

5/4731/5481/79861/1350/1351/4694/7479/4702/1329/7477/8322/4697/1349/27089/4717/4695/43  
'1329/5435/4697/1349/27089/6647/4717/4695/2880/29796/4706

55/7157/6776/3563/3673/637/367/5728/1026/5371/2335/8503/1871/7046/4853/3572/3718/6513/  
3/355/7157/125893/26152/27102/342909/637/284307/9831/84671/91661/5371/8503/140612/6041



7/2892/6390/196385/5693/4715/11273/10297/4705/4731/5481/79861/1350/1351/4694/7479/4702

11/29796/810/4137/4706



'6667/10161/8772/8324/2308/2952/8202/3551/3908/1021/9915/1441/405/1909/7042/2323/624/16  
/57547/5199/126017/163049/7098/7554/9534/8772/7559/3551/5819/84924/148022/90333/9641/!



/1329/7477/6300/5582/8322/4697/1349/10133/27089/818/6647/4717/65018/4695/2880/29796/81

312/182/2033/7040/4286/7704/6502

5610/7699/349075/10172/10482/7539/170960/80818/4790/93134/29992/79788/57711/7773/4405:



L0/4137/4706

15/55659/3678/7767/163050/5293/7678/64135/55552/284406/9668/57343/121274/57335/92595/!







5451/284390/163081/7673/10520/80110/80778/57693/3459/282890/208/7633/345462/4938/3429:





26/578/7568/148268/90594/25888/6427/84527/26974/10793/1965/84874/7562/126231/6431/1481





L03/6432/730051/55900/7738/79862/51710/3125/3127/93474/7637/207/6428/147694/8890/7549/







'3654/7771/147923/5499/3454/374900/440275/55762/7581/8427/3717/7730/57506/3593/7124/10'





780/7582/7761/158431/84449
