# Supplementary material for: The Potential Diagnostic Value of Immune-Related Genes in Interstitial Fibrosis and Tubular Atrophy after Kidney Transplantation
Source: Hindawi journal article supplement (doi:10.1155/2022/7212852), 2022-06-17
Supplement: f1 [file 7212852.f1.zip]

| Symbol    | logFC    | AveExpr  | t        | P.Value  | adj.P.Val | B        |
|-----------|----------|----------|----------|----------|-----------|----------|
| KRT17P5   | -42.9528 | 75.04348 | -4.17698 | 0.000125 | 0.999016  | -4.59452 |
| RP5-1118E | 51.25628 | 100.7396 | 3.927364 | 0.000276 | 0.999016  | -4.59457 |
| TMPRSS13  | -39.2168 | 67.52532 | -3.75106 | 0.000477 | 0.999016  | -4.59462 |
| LOC100130 | -32.1718 | 53.2153  | -3.72094 | 0.000523 | 0.999016  | -4.59462 |
| NOBOX     | -30.6522 | 52.7602  | -3.69177 | 0.000571 | 0.999016  | -4.59463 |
| SERPINA7  | -24.3801 | 52.25114 | -3.57735 | 0.000808 | 0.999016  | -4.59465 |
| LOC100130 | -37.3926 | 90.36205 | -3.56706 | 0.000834 | 0.999016  | -4.59466 |
| LCE1B     | -27.4107 | 47.98259 | -3.55552 | 0.000863 | 0.999016  | -4.59466 |
| FLJ43315  | -21.04   | 28.55254 | -3.46021 | 0.001147 | 0.999016  | -4.59468 |
| LOC44070  | -10.6101 | 9.317385 | -3.45186 | 0.001176 | 0.999016  | -4.59468 |
| IDH1-AS1  | -28.7626 | 55.93655 | -3.43824 | 0.001224 | 0.999016  | -4.59469 |
| LOC10192  | -21.5052 | 33.28268 | -3.30879 | 0.001788 | 0.999016  | -4.59472 |
| FAM71F2   | -13.733  | 22.39132 | -3.29462 | 0.001863 | 0.999016  | -4.59472 |
| ADORA2B   | 29.74976 | 49.01925 | 3.260485 | 0.002055 | 0.999016  | -4.59473 |
| LCT       | -28.1295 | 54.50184 | -3.24713 | 0.002136 | 0.999016  | -4.59473 |
| SERPINA3  | 256.1172 | 329.4074 | 3.190582 | 0.00251  | 0.999016  | -4.59474 |
| CHRM5     | -22.6432 | 43.09086 | -3.1901  | 0.002514 | 0.999016  | -4.59474 |
| LRFN1     | -26.0948 | 48.27602 | -3.16697 | 0.002685 | 0.999016  | -4.59475 |
| C15orf27  | -62.4593 | 166.6657 | -3.14716 | 0.002839 | 0.999016  | -4.59475 |
| LOC10192  | -39.5183 | 143.3279 | -3.12358 | 0.003035 | 0.999016  | -4.59476 |
| MIR4313   | -20.7239 | 35.5426  | -3.10304 | 0.003215 | 0.999016  | -4.59476 |
| EU250746  | -25.1865 | 80.11572 | -3.07074 | 0.003519 | 0.999016  | -4.59477 |
| TBC1D29   | -30.4876 | 72.42854 | -3.06975 | 0.003529 | 0.999016  | -4.59477 |
| LOC10192  | -34.2811 | 72.18692 | -3.06093 | 0.003617 | 0.999016  | -4.59477 |
| BC028670  | -17.7586 | 27.80433 | -3.05319 | 0.003695 | 0.999016  | -4.59477 |
| C1QTNF7   | -84.7769 | 239.5343 | -3.0528  | 0.003699 | 0.999016  | -4.59477 |
| FGF3      | -11.2703 | 15.97071 | -3.03035 | 0.003937 | 0.999016  | -4.59478 |
| AK125860  | -17.874  | 29.01106 | -3.02313 | 0.004017 | 0.999016  | -4.59478 |
| SLC26A8   | -13.8437 | 18.19411 | -3.0215  | 0.004035 | 0.999016  | -4.59478 |
| XRCC2     | -82.1284 | 342.2921 | -3.01725 | 0.004082 | 0.999016  | -4.59478 |
| LINC00964 | -16.4623 | 36.14829 | -3.0157  | 0.0041   | 0.999016  | -4.59478 |
| LINC00636 | -25.0433 | 98.63393 | -2.98199 | 0.004499 | 0.999016  | -4.59479 |
| RP5-1092A | -157.638 | 443.1292 | -2.97139 | 0.004632 | 0.999016  | -4.59479 |
| FAS-AS1   | -19.611  | 40.555   | -2.96821 | 0.004672 | 0.999016  | -4.59479 |
| EXOSC6    | -84.2575 | 413.9853 | -2.95817 | 0.004802 | 0.999016  | -4.59479 |
| FAM166A   | -19.0197 | 39.70964 | -2.95339 | 0.004866 | 0.999016  | -4.59479 |
| PRAMEF11  | -27.0253 | 85.0163  | -2.94456 | 0.004984 | 0.999016  | -4.5948  |
| AX748417  | -25.8674 | 68.42319 | -2.92833 | 0.00521  | 0.999016  | -4.5948  |
| LOC10192  | -48.738  | 223.5055 | -2.91282 | 0.005434 | 0.999016  | -4.5948  |
| OR4D1     | -14.1384 | 42.35553 | -2.89708 | 0.00567  | 0.999016  | -4.59481 |
| LOC64275  | -18.0309 | 19.92311 | -2.8851  | 0.005857 | 0.999016  | -4.59481 |
| RTTN      | -81.4917 | 375.9194 | -2.88241 | 0.005899 | 0.999016  | -4.59481 |
| LOC10192  | -31.8568 | 97.88733 | -2.87212 | 0.006065 | 0.999016  | -4.59481 |
| AK025117  | -72.9022 | 294.6878 | -2.86018 | 0.006263 | 0.999016  | -4.59481 |
| LOC10192  | -22.1176 | 31.91583 | -2.85772 | 0.006305 | 0.999016  | -4.59481 |
| SPTBN4    | -24.6448 | 106.8494 | -2.8476  | 0.006478 | 0.999016  | -4.59482 |
| CHRN4     | -16.8713 | 41.93428 | -2.84425 | 0.006536 | 0.999016  | -4.59482 |
| LOC38964  | -27.1017 | 63.09472 | -2.83931 | 0.006623 | 0.999016  | -4.59482 |
| ERICH6    | -31.6146 | 57.35751 | -2.83234 | 0.006748 | 0.999016  | -4.59482 |
| C19orf84  | -29.7005 | 48.54293 | -2.8226  | 0.006925 | 0.999016  | -4.59482 |
| DMRTB1    | -18.8747 | 33.68519 | -2.81122 | 0.007139 | 0.999016  | -4.59482 |
| PLAC8L1   | -32.1359 | 126.283  | -2.80916 | 0.007178 | 0.999016  | -4.59482 |
| AC002059  | -37.9071 | 111.1328 | -2.80501 | 0.007257 | 0.999016  | -4.59483 |
| PCDHGA1   | -12.1089 | 14.45025 | -2.80357 | 0.007285 | 0.999016  | -4.59483 |
| DUX1      | -47.6156 | 99.84023 | -2.79315 | 0.007489 | 0.999016  | -4.59483 |
| LOC10192  | -16.5969 | 34.04448 | -2.78724 | 0.007607 | 0.999016  | -4.59483 |
| SLX4      | -24.0286 | 84.41179 | -2.78672 | 0.007618 | 0.999016  | -4.59483 |

|           |          |          |          |          |          |          |
|-----------|----------|----------|----------|----------|----------|----------|
| LA16c-83F | -26.2057 | 85.3961  | -2.78669 | 0.007619 | 0.999016 | -4.59483 |
| KCNN1     | -64.8471 | 120.9151 | -2.78614 | 0.00763  | 0.999016 | -4.59483 |
| AKAP12    | 498.8013 | 1700.963 | 2.78418  | 0.007669 | 0.999016 | -4.59483 |
| NMNAT3    | -86.6043 | 346.7995 | -2.78314 | 0.00769  | 0.999016 | -4.59483 |
| ANKRD20A  | -25.2806 | 48.41329 | -2.78287 | 0.007696 | 0.999016 | -4.59483 |
| CNBD2     | -14.7115 | 40.06462 | -2.78271 | 0.007699 | 0.999016 | -4.59483 |
| ZNF138    | -28.766  | 148.4404 | -2.7817  | 0.00772  | 0.999016 | -4.59483 |
| TMEM238   | 11.57918 | 14.8306  | 2.779311 | 0.007769 | 0.999016 | -4.59483 |
| VSIG10L   | 37.15298 | 89.88    | 2.779112 | 0.007773 | 0.999016 | -4.59483 |
| C3orf20   | -15.604  | 28.36265 | -2.77164 | 0.007927 | 0.999016 | -4.59483 |
| PYCRL     | 60.96854 | 126.7954 | 2.759584 | 0.008183 | 0.999016 | -4.59483 |
| LOC101921 | -28.6963 | 69.20504 | -2.75477 | 0.008288 | 0.999016 | -4.59484 |
| LOC101061 | -6.64939 | 10.14375 | -2.75306 | 0.008325 | 0.999016 | -4.59484 |
| RP11-480A | -57.2878 | 253.4486 | -2.75249 | 0.008338 | 0.999016 | -4.59484 |
| LUZP4     | -28.2007 | 28.22965 | -2.7504  | 0.008383 | 0.999016 | -4.59484 |
| SNORD3A   | -17.9669 | 34.0414  | -2.74494 | 0.008505 | 0.999016 | -4.59484 |
| LINC00659 | 13.58049 | 20.98586 | 2.743547 | 0.008536 | 0.999016 | -4.59484 |
| CENPP     | -44.4695 | 163.0477 | -2.73791 | 0.008663 | 0.999016 | -4.59484 |
| BGLT3     | -34.2527 | 102.9943 | -2.73027 | 0.008838 | 0.999016 | -4.59484 |
| LOC102721 | -25.2149 | 102.6097 | -2.72849 | 0.008879 | 0.999016 | -4.59484 |
| LOC44093A | -24.3762 | 82.94451 | -2.72167 | 0.009039 | 0.999016 | -4.59484 |
| CTC-471C  | -11.1808 | 16.48991 | -2.71329 | 0.009239 | 0.999016 | -4.59484 |
| LOC100501 | -14.1924 | 26.11775 | -2.71305 | 0.009244 | 0.999016 | -4.59484 |
| CNGA4     | -20.3114 | 46.06622 | -2.71012 | 0.009315 | 0.999016 | -4.59484 |
| SCN11A    | -17.477  | 60.96436 | -2.69971 | 0.009571 | 0.999016 | -4.59485 |
| AMELX     | -16.186  | 44.85705 | -2.69962 | 0.009573 | 0.999016 | -4.59485 |
| C12orf54  | -11.2045 | 33.5022  | -2.69931 | 0.009581 | 0.999016 | -4.59485 |
| OR2B4P    | -32.0763 | 74.48554 | -2.69626 | 0.009657 | 0.999016 | -4.59485 |
| SNORA21   | -23.3085 | 83.63817 | -2.69071 | 0.009798 | 0.999016 | -4.59485 |
| RP11-304C | -17.2661 | 23.36695 | -2.68712 | 0.009889 | 0.999016 | -4.59485 |
| TKT       | 130.1126 | 644.939  | 2.679562 | 0.010085 | 0.999016 | -4.59485 |
| LOC101921 | -38.0852 | 108.1819 | -2.67634 | 0.010169 | 0.999016 | -4.59485 |
| MGC57346  | -23.0028 | 68.87904 | -2.67115 | 0.010307 | 0.999016 | -4.59485 |
| GUSBP2    | -23.0047 | 76.61124 | -2.67078 | 0.010316 | 0.999016 | -4.59485 |
| LRRC52    | -61.1948 | 175.8973 | -2.66879 | 0.01037  | 0.999016 | -4.59485 |
| MS4A7     | 162.4808 | 384.9156 | 2.667676 | 0.0104   | 0.999016 | -4.59485 |
| LOC100501 | -18.7534 | 68.92499 | -2.65816 | 0.010658 | 0.999016 | -4.59486 |
| RAPGEF4   | -40.3675 | 201.5071 | -2.65476 | 0.010752 | 0.999016 | -4.59486 |
| KCNQ3     | -17.1233 | 86.59888 | -2.64944 | 0.0109   | 0.999016 | -4.59486 |
| NAPA-AS1  | -21.1981 | 73.71513 | -2.64695 | 0.01097  | 0.999016 | -4.59486 |
| MESP1     | -26.746  | 84.34498 | -2.64366 | 0.011063 | 0.999016 | -4.59486 |
| KRT76     | -11.1309 | 15.43821 | -2.64222 | 0.011104 | 0.999016 | -4.59486 |
| GRK7      | -12.9556 | 25.6948  | -2.64092 | 0.011141 | 0.999016 | -4.59486 |
| C8orf17   | -16.2875 | 34.08705 | -2.63606 | 0.011281 | 0.999016 | -4.59486 |
| AC068831  | -22.2018 | 37.05541 | -2.63403 | 0.01134  | 0.999016 | -4.59486 |
| PTOV1-AS  | -21.0465 | 83.35741 | -2.63033 | 0.011448 | 0.999016 | -4.59486 |
| LOC100501 | -36.7939 | 178.9763 | -2.62612 | 0.011572 | 0.999016 | -4.59486 |
| LINC00551 | -19.9208 | 55.62942 | -2.62099 | 0.011725 | 0.999016 | -4.59486 |
| AP000265  | 11.89944 | 24.15342 | 2.620967 | 0.011726 | 0.999016 | -4.59486 |
| LOC285691 | -17.3167 | 44.83213 | -2.61951 | 0.01177  | 0.999016 | -4.59486 |
| MICA      | -189.128 | 784.856  | -2.61811 | 0.011812 | 0.999016 | -4.59486 |
| SH2D4B    | -15.0414 | 43.2134  | -2.61131 | 0.012019 | 0.999016 | -4.59487 |
| HIST1H2AI | -11.4217 | 37.3009  | -2.60885 | 0.012094 | 0.999016 | -4.59487 |
| BRD1      | -44.514  | 153.2096 | -2.60866 | 0.0121   | 0.999016 | -4.59487 |
| LINC00629 | -17.7219 | 50.33816 | -2.60184 | 0.012312 | 0.999016 | -4.59487 |
| LOC100131 | -12.7331 | 30.27022 | -2.59603 | 0.012495 | 0.999016 | -4.59487 |
| FGF8      | -6.48691 | 9.113177 | -2.59414 | 0.012556 | 0.999016 | -4.59487 |
| BC031864  | -28.4145 | 72.27819 | -2.59234 | 0.012613 | 0.999016 | -4.59487 |

|           |          |          |          |          |          |          |
|-----------|----------|----------|----------|----------|----------|----------|
| REEP2     | -62.1299 | 121.0607 | -2.59119 | 0.01265  | 0.999016 | -4.59487 |
| TNNT2     | -41.2614 | 125.3014 | -2.59075 | 0.012664 | 0.999016 | -4.59487 |
| HOXA-AS1  | -28.142  | 49.57154 | -2.58929 | 0.012711 | 0.999016 | -4.59487 |
| FAM47B    | -11.0987 | 20.87379 | -2.58485 | 0.012855 | 0.999016 | -4.59487 |
| BCL2L10   | -21.7346 | 100.1647 | -2.57965 | 0.013026 | 0.999016 | -4.59487 |
| SLIT2-IT1 | -15.4022 | 29.30286 | -2.57627 | 0.013138 | 0.999016 | -4.59487 |
| LINC00998 | -329.778 | 1533.713 | -2.57351 | 0.01323  | 0.999016 | -4.59487 |
| LOC100501 | -13.6811 | 32.8886  | -2.5721  | 0.013277 | 0.999016 | -4.59487 |
| EPS8L3    | -30.0478 | 67.69691 | -2.56892 | 0.013384 | 0.999016 | -4.59487 |
| KIF20A    | 24.88384 | 42.60298 | 2.568782 | 0.013389 | 0.999016 | -4.59487 |
| LINC00202 | -13.6665 | 35.24474 | -2.56866 | 0.013393 | 0.999016 | -4.59487 |
| MRM1      | -49.7714 | 193.5763 | -2.56721 | 0.013443 | 0.999016 | -4.59487 |
| LOC102659 | 17.08219 | 31.88334 | 2.560056 | 0.013687 | 0.999016 | -4.59488 |
| HMX1      | -17.2169 | 35.24868 | -2.55983 | 0.013695 | 0.999016 | -4.59488 |
| CTAGE1    | -12.7223 | 41.53128 | -2.55833 | 0.013747 | 0.999016 | -4.59488 |
| NHLH2     | -11.3556 | 24.57988 | -2.55663 | 0.013806 | 0.999016 | -4.59488 |
| CDH4      | -10.8909 | 43.84293 | -2.55504 | 0.013862 | 0.999016 | -4.59488 |
| RPS29P28  | -13.0071 | 21.76605 | -2.55413 | 0.013893 | 0.999016 | -4.59488 |
| SLC7A11   | -13.9862 | 42.84491 | -2.55392 | 0.013901 | 0.999016 | -4.59488 |
| RP11-164F | -51.8531 | 119.2288 | -2.55153 | 0.013985 | 0.999016 | -4.59488 |
| CCDC42B   | -21.2287 | 62.16969 | -2.55031 | 0.014028 | 0.999016 | -4.59488 |
| LINC01304 | -17.7327 | 33.65095 | -2.54935 | 0.014062 | 0.999016 | -4.59488 |
| FAM9B     | -8.34893 | 19.36948 | -2.54908 | 0.014071 | 0.999016 | -4.59488 |
| OSTCP1    | 15.40753 | 39.91453 | 2.546577 | 0.01416  | 0.999016 | -4.59488 |
| OR2H4P    | -21.1649 | 74.57499 | -2.54461 | 0.01423  | 0.999016 | -4.59488 |
| CACNG8    | -17.0243 | 61.31463 | -2.54342 | 0.014273 | 0.999016 | -4.59488 |
| LOC390701 | -20.9333 | 77.54971 | -2.5397  | 0.014407 | 0.999016 | -4.59488 |
| RP3-334F4 | -61.667  | 252.973  | -2.53753 | 0.014486 | 0.999016 | -4.59488 |
| KCNJ4     | -11.0312 | 23.78104 | -2.53712 | 0.014501 | 0.999016 | -4.59488 |
| AC012531  | -9.58465 | 23.11866 | -2.53656 | 0.014521 | 0.999016 | -4.59488 |
| ANKRD18E  | -28.4795 | 79.64662 | -2.53254 | 0.014668 | 0.999016 | -4.59488 |
| KIAA0895  | -116.763 | 597.792  | -2.53183 | 0.014694 | 0.999016 | -4.59488 |
| LOC101921 | 30.89896 | 47.17521 | 2.530327 | 0.01475  | 0.999016 | -4.59488 |
| ENO1-AS1  | -34.3617 | 123.9854 | -2.52859 | 0.014814 | 0.999016 | -4.59488 |
| MAPK15    | -22.151  | 74.65362 | -2.51616 | 0.015282 | 0.999016 | -4.59488 |
| EP400NL   | -12.8683 | 55.76901 | -2.51403 | 0.015363 | 0.999016 | -4.59488 |
| LOC401311 | -25.9632 | 81.05446 | -2.51128 | 0.015469 | 0.999016 | -4.59489 |
| LINC00348 | -8.96665 | 20.0046  | -2.51103 | 0.015479 | 0.999016 | -4.59489 |
| DTX2      | -17.1218 | 41.31919 | -2.50331 | 0.015779 | 0.999016 | -4.59489 |
| CTXN1     | 26.4606  | 33.63257 | 2.496211 | 0.016061 | 0.999016 | -4.59489 |
| GLIPR1L1  | -25.2871 | 83.14094 | -2.4951  | 0.016105 | 0.999016 | -4.59489 |
| AC002064  | -14.0712 | 34.05206 | -2.49074 | 0.016281 | 0.999016 | -4.59489 |
| PSD       | -17.4187 | 38.0433  | -2.48701 | 0.016432 | 0.999016 | -4.59489 |
| RP11-96H1 | -11.5302 | 23.16613 | -2.48668 | 0.016445 | 0.999016 | -4.59489 |
| MGC34796  | -19.0373 | 36.81117 | -2.48641 | 0.016456 | 0.999016 | -4.59489 |
| C2orf50   | -4.88596 | 10.0827  | -2.48618 | 0.016466 | 0.999016 | -4.59489 |
| LINC01015 | -20.9279 | 32.64672 | -2.48375 | 0.016565 | 0.999016 | -4.59489 |
| RFXAP     | -40.1307 | 235.2047 | -2.48137 | 0.016663 | 0.999016 | -4.59489 |
| ADAM5     | -18.1964 | 56.5397  | -2.47852 | 0.016781 | 0.999016 | -4.59489 |
| RP11-330C | -16.4385 | 68.66668 | -2.47653 | 0.016864 | 0.999016 | -4.59489 |
| GOLGA4    | -240.183 | 1421.645 | -2.47358 | 0.016988 | 0.999016 | -4.59489 |
| RP1-155D1 | -22.3757 | 100.9581 | -2.47289 | 0.017017 | 0.999016 | -4.59489 |
| LOC101921 | -21.8334 | 48.82625 | -2.47275 | 0.017023 | 0.999016 | -4.59489 |
| LOC100501 | -19.8216 | 52.63715 | -2.47036 | 0.017123 | 0.999016 | -4.59489 |
| BEST4     | 9.3811   | 16.28946 | 2.46648  | 0.017288 | 0.999016 | -4.59489 |
| GOT2      | -1581.14 | 6424.421 | -2.46635 | 0.017294 | 0.999016 | -4.59489 |
| VIP       | -16.6748 | 33.52804 | -2.46331 | 0.017424 | 0.999016 | -4.5949  |
| LOC148691 | -30.2903 | 81.22494 | -2.46069 | 0.017537 | 0.999016 | -4.5949  |

|           |          |          |          |          |          |         |
|-----------|----------|----------|----------|----------|----------|---------|
| TMPRSS15  | -27.9998 | 100.4007 | -2.45643 | 0.017722 | 0.999016 | -4.5949 |
| FAM209A   | -10.2142 | 25.39369 | -2.45519 | 0.017776 | 0.999016 | -4.5949 |
| DYNLL2    | -237.776 | 1323.048 | -2.45406 | 0.017826 | 0.999016 | -4.5949 |
| LINGO2    | -55.4777 | 180.4925 | -2.45343 | 0.017853 | 0.999016 | -4.5949 |
| NTRK1     | -18.024  | 31.07313 | -2.44857 | 0.018068 | 0.999016 | -4.5949 |
| IER3      | 643.7898 | 2207.366 | 2.447207 | 0.018129 | 0.999016 | -4.5949 |
| DDX59     | -90.8965 | 636.8156 | -2.4455  | 0.018205 | 0.999016 | -4.5949 |
| LINC01091 | -22.1718 | 45.77384 | -2.44486 | 0.018234 | 0.999016 | -4.5949 |
| SCEL      | 7.266257 | 22.17366 | 2.439389 | 0.01848  | 0.999016 | -4.5949 |
| RPL7A2    | -63.2573 | 277.6635 | -2.43679 | 0.018598 | 0.999016 | -4.5949 |
| LOC10029  | -16.8412 | 40.10333 | -2.43675 | 0.0186   | 0.999016 | -4.5949 |
| MROH6     | -53.6281 | 208.3849 | -2.42838 | 0.018985 | 0.999016 | -4.5949 |
| LOC10012  | -19.3321 | 31.50627 | -2.42306 | 0.019234 | 0.999016 | -4.5949 |
| SNRPN     | -15.2763 | 63.10998 | -2.42248 | 0.019261 | 0.999016 | -4.5949 |
| DGCR14    | -42.3792 | 130.3341 | -2.41975 | 0.01939  | 0.999016 | -4.5949 |
| IL36G     | 17.09072 | 27.93766 | 2.417689 | 0.019488 | 0.999016 | -4.5949 |
| FAM83F    | -40.205  | 161.1346 | -2.41385 | 0.019671 | 0.999016 | -4.5949 |
| ARHGAP28  | -38.4784 | 165.9006 | -2.41154 | 0.019782 | 0.999016 | -4.5949 |
| LOC10050  | -67.801  | 261.7517 | -2.40806 | 0.019951 | 0.999016 | -4.5949 |
| AX747826  | 24.29945 | 67.09094 | 2.407384 | 0.019984 | 0.999016 | -4.5949 |
| RBBP8NL   | -17.2316 | 26.09512 | -2.4043  | 0.020134 | 0.999016 | -4.5949 |
| LINC01019 | -14.6362 | 30.77771 | -2.40248 | 0.020223 | 0.999016 | -4.5949 |
| C6orf163  | -22.8635 | 104.2388 | -2.40128 | 0.020282 | 0.999016 | -4.5949 |
| LOC72986  | 10.1351  | 17.03116 | 2.396723 | 0.020508 | 0.999016 | -4.5949 |
| OCA2      | -33.5259 | 75.07241 | -2.39522 | 0.020583 | 0.999016 | -4.5949 |
| FAM228A   | -21.2206 | 72.21572 | -2.39451 | 0.020619 | 0.999016 | -4.5949 |
| GPLD1     | -10.6368 | 55.66359 | -2.39432 | 0.020628 | 0.999016 | -4.5949 |
| ZNF485    | -20.0354 | 53.2643  | -2.39256 | 0.020716 | 0.999016 | -4.5949 |
| PKMYT1    | -69.793  | 225.3682 | -2.39163 | 0.020763 | 0.999016 | -4.5949 |
| POLR3E    | -5.63086 | 9.737078 | -2.38862 | 0.020915 | 0.999016 | -4.5949 |
| LOC10192  | -24.1142 | 65.43158 | -2.3886  | 0.020916 | 0.999016 | -4.5949 |
| RP11-672L | -118.266 | 575.7246 | -2.38842 | 0.020925 | 0.999016 | -4.5949 |
| LOC10050  | -24.6639 | 122.5222 | -2.38446 | 0.021127 | 0.999016 | -4.5949 |
| FLJ42351  | -27.6226 | 131.8082 | -2.38323 | 0.02119  | 0.999016 | -4.5949 |
| MIR302B   | -29.7921 | 148.2507 | -2.38305 | 0.021199 | 0.999016 | -4.5949 |
| LINC00948 | -453.146 | 609.7772 | -2.38199 | 0.021254 | 0.999016 | -4.5949 |
| AMH       | 13.29283 | 22.9434  | 2.381328 | 0.021288 | 0.999016 | -4.5949 |
| LINC00299 | -14.7326 | 42.91917 | -2.38113 | 0.021298 | 0.999016 | -4.5949 |
| CTC-550B  | -25.3066 | 63.76184 | -2.38074 | 0.021318 | 0.999016 | -4.5949 |
| ADAMTS1   | 31.52416 | 76.30534 | 2.379635 | 0.021375 | 0.999016 | -4.5949 |
| MMP7      | 1799.941 | 3602.791 | 2.37781  | 0.02147  | 0.999016 | -4.5949 |
| SOCS7     | -142.631 | 904.7813 | -2.37776 | 0.021472 | 0.999016 | -4.5949 |
| RP11-506C | -38.6946 | 163.9045 | -2.37335 | 0.021702 | 0.999016 | -4.5949 |
| AP006547  | -15.8766 | 35.74472 | -2.37254 | 0.021745 | 0.999016 | -4.5949 |
| LOC10050  | 299.1624 | 562.4242 | 2.370321 | 0.021861 | 0.999016 | -4.5949 |
| MTSS1L    | 9.863543 | 39.6279  | 2.368108 | 0.021978 | 0.999016 | -4.5949 |
| GK-AS1    | -27.2947 | 109.4782 | -2.36808 | 0.02198  | 0.999016 | -4.5949 |
| LOC10050  | -51.2716 | 268.9886 | -2.36636 | 0.022071 | 0.999016 | -4.5949 |
| LINC00924 | 182.7142 | 532.5404 | 2.366027 | 0.022089 | 0.999016 | -4.5949 |
| ASB15     | -38.0781 | 80.56304 | -2.36145 | 0.022333 | 0.999016 | -4.5949 |
| BC041363  | -11.8193 | 24.32792 | -2.35742 | 0.022552 | 0.999016 | -4.5949 |
| MRC1      | 362.521  | 1306.206 | 2.357409 | 0.022552 | 0.999016 | -4.5949 |
| VPS37D    | 43.14435 | 152.6287 | 2.357196 | 0.022563 | 0.999016 | -4.5949 |
| TMEM255   | -37.9411 | 90.3517  | -2.35532 | 0.022665 | 0.999016 | -4.5949 |
| CYCSP33   | -38.3024 | 135.2743 | -2.35482 | 0.022692 | 0.999016 | -4.5949 |
| RP11-308C | -26.361  | 100.8969 | -2.35229 | 0.022831 | 0.999016 | -4.5949 |
| PPFIA2    | -15.2193 | 69.71951 | -2.35109 | 0.022897 | 0.999016 | -4.5949 |
| ANKAR     | -10.0444 | 44.02417 | -2.3494  | 0.02299  | 0.999016 | -4.5949 |

|           |          |          |          |          |          |          |
|-----------|----------|----------|----------|----------|----------|----------|
| NKX6-3    | -37.6027 | 151.7175 | -2.34727 | 0.023108 | 0.999016 | -4.59492 |
| GS1-279B  | -31.5575 | 88.29428 | -2.34718 | 0.023113 | 0.999016 | -4.59492 |
| MICU2     | -1211.98 | 8344.11  | -2.34447 | 0.023263 | 0.999016 | -4.59492 |
| LOC10272  | 14.6883  | 26.34679 | 2.341491 | 0.02343  | 0.999016 | -4.59492 |
| CDHR1     | -16.3673 | 38.75989 | -2.34069 | 0.023475 | 0.999016 | -4.59492 |
| RP5-855D  | -18.5    | 46.1593  | -2.34055 | 0.023483 | 0.999016 | -4.59492 |
| OPTC      | -32.8664 | 141.5395 | -2.3398  | 0.023525 | 0.999016 | -4.59492 |
| RABGEF1   | -66.5921 | 270.459  | -2.33909 | 0.023565 | 0.999016 | -4.59492 |
| LOC64365  | -14.2703 | 14.6155  | -2.3384  | 0.023604 | 0.999016 | -4.59492 |
| ATF6B     | -20.6501 | 90.23036 | -2.33636 | 0.02372  | 0.999016 | -4.59492 |
| ZNF169    | -17.4105 | 73.27052 | -2.3355  | 0.023768 | 0.999016 | -4.59492 |
| SNX29     | -19.8012 | 100.5149 | -2.33423 | 0.02384  | 0.999016 | -4.59492 |
| LOC28550  | -14.54   | 26.69953 | -2.33387 | 0.023861 | 0.999016 | -4.59492 |
| TMEM262   | -6.99847 | 13.3098  | -2.32937 | 0.024119 | 0.999016 | -4.59492 |
| IL20      | -18.8346 | 44.60032 | -2.32891 | 0.024146 | 0.999016 | -4.59492 |
| ZNF583    | -21.8248 | 110.5902 | -2.32471 | 0.024389 | 0.999016 | -4.59492 |
| LOC10050  | -77.0348 | 390.3983 | -2.3231  | 0.024483 | 0.999016 | -4.59492 |
| PPY       | -14.8098 | 26.10526 | -2.32304 | 0.024486 | 0.999016 | -4.59492 |
| LOC10050  | -27.1002 | 90.15587 | -2.32244 | 0.024521 | 0.999016 | -4.59492 |
| ZFHx2     | -31.0027 | 160.5079 | -2.32225 | 0.024532 | 0.999016 | -4.59492 |
| MYH15     | -16.9002 | 58.71157 | -2.32185 | 0.024556 | 0.999016 | -4.59492 |
| EFR3B     | -20.1413 | 114.2129 | -2.32087 | 0.024613 | 0.999016 | -4.59492 |
| FRMD7     | -38.1785 | 133.5765 | -2.32056 | 0.024631 | 0.999016 | -4.59492 |
| NBPF8     | -13.1521 | 42.35002 | -2.31987 | 0.024672 | 0.999016 | -4.59492 |
| RP11-102M | -21.684  | 43.93555 | -2.31684 | 0.02485  | 0.999016 | -4.59492 |
| USP2-AS1  | -34.9876 | 82.90303 | -2.31657 | 0.024866 | 0.999016 | -4.59492 |
| BC037861  | -24.0053 | 88.50107 | -2.31476 | 0.024974 | 0.999016 | -4.59492 |
| EVX1      | -15.7879 | 84.64106 | -2.30574 | 0.025515 | 0.999016 | -4.59493 |
| GLTPD2    | -59.8581 | 111.5867 | -2.30548 | 0.025531 | 0.999016 | -4.59493 |
| LOC10192  | -11.6962 | 20.83497 | -2.3029  | 0.025687 | 0.999016 | -4.59493 |
| KRTAP4-6  | -26.1738 | 42.50504 | -2.30285 | 0.02569  | 0.999016 | -4.59493 |
| TCL1A     | 23.0734  | 68.81839 | 2.302058 | 0.025739 | 0.999016 | -4.59493 |
| LEMD1     | -22.4976 | 93.89129 | -2.30171 | 0.02576  | 0.999016 | -4.59493 |
| SNORD116  | -29.1326 | 72.08899 | -2.30002 | 0.025863 | 0.999016 | -4.59493 |
| COX3      | -1971.08 | 9495.46  | -2.29886 | 0.025934 | 0.999016 | -4.59493 |
| GPR34     | 189.0767 | 748.5625 | 2.296841 | 0.026059 | 0.999016 | -4.59493 |
| ZSCAN10   | -14.1992 | 36.34598 | -2.29667 | 0.02607  | 0.999016 | -4.59493 |
| CARD11    | -11.9548 | 39.4318  | -2.29627 | 0.026094 | 0.999016 | -4.59493 |
| PCNXL3    | 12.46938 | 22.47208 | 2.294872 | 0.026181 | 0.999016 | -4.59493 |
| LOC10192  | -7.03031 | 9.592128 | -2.29468 | 0.026192 | 0.999016 | -4.59493 |
| LOC10050  | -17.5697 | 36.9316  | -2.29322 | 0.026283 | 0.999016 | -4.59493 |
| DNAJC30   | -41.4499 | 263.9713 | -2.29149 | 0.026391 | 0.999016 | -4.59493 |
| RP11-391M | -118.83  | 463.9415 | -2.29091 | 0.026427 | 0.999016 | -4.59493 |
| ORAOV1    | -24.2358 | 136.5283 | -2.29083 | 0.026432 | 0.999016 | -4.59493 |
| KIAA2026  | -62.3313 | 412.6609 | -2.29009 | 0.026479 | 0.999016 | -4.59493 |
| LINC0096C | 34.14606 | 99.59673 | 2.289687 | 0.026504 | 0.999016 | -4.59493 |
| SHC3      | -30.0074 | 124.2904 | -2.28812 | 0.026602 | 0.999016 | -4.59493 |
| VWCE      | 26.17472 | 73.02907 | 2.28367  | 0.026883 | 0.999016 | -4.59493 |
| LOC44079  | -14.5849 | 47.46847 | -2.28151 | 0.02702  | 0.999016 | -4.59493 |
| RP11-664L | -25.9764 | 78.04789 | -2.28053 | 0.027083 | 0.999016 | -4.59493 |
| RP11-410L | -101.899 | 466.1866 | -2.2781  | 0.027238 | 0.999016 | -4.59493 |
| LOC10272  | 13.67793 | 32.91807 | 2.27705  | 0.027306 | 0.999016 | -4.59493 |
| RP11-114L | -27.2162 | 81.71753 | -2.27674 | 0.027326 | 0.999016 | -4.59493 |
| LOC10192  | -22.8096 | 55.52792 | -2.27561 | 0.027399 | 0.999016 | -4.59493 |
| STEAP3    | -73.09   | 202.2216 | -2.27558 | 0.027401 | 0.999016 | -4.59493 |
| PRDM12    | -43.1574 | 119.1464 | -2.27418 | 0.027491 | 0.999016 | -4.59493 |
| RP5-894A  | 13.49744 | 22.38859 | 2.273566 | 0.027531 | 0.999016 | -4.59493 |
| LINC01023 | -35.8267 | 140.1082 | -2.27311 | 0.027561 | 0.999016 | -4.59493 |

|           |          |          |          |          |          |          |
|-----------|----------|----------|----------|----------|----------|----------|
| KIAA0101  | 52.42334 | 258.1121 | 2.273015 | 0.027567 | 0.999016 | -4.59493 |
| ZNF324B   | -18.5275 | 67.21895 | -2.27299 | 0.027568 | 0.999016 | -4.59493 |
| ZNF625    | -44.3393 | 212.5235 | -2.2711  | 0.027691 | 0.999016 | -4.59493 |
| RPS6KA3   | -194.229 | 1099.572 | -2.27083 | 0.027709 | 0.999016 | -4.59493 |
| NAT16     | -47.4558 | 133.3327 | -2.27059 | 0.027724 | 0.999016 | -4.59493 |
| SIK3      | -50.1444 | 390.2119 | -2.26932 | 0.027807 | 0.999016 | -4.59493 |
| TNFRSF4   | -11.0804 | 30.80096 | -2.26852 | 0.02786  | 0.999016 | -4.59493 |
| KRTAP19-1 | -12.0684 | 27.20346 | -2.26729 | 0.02794  | 0.999016 | -4.59493 |
| CLDN18    | -12.2428 | 41.72194 | -2.26672 | 0.027977 | 0.999016 | -4.59493 |
| GBP3      | 670.1624 | 1722.945 | 2.266057 | 0.028021 | 0.999016 | -4.59493 |
| TRAV8-3   | -17.4467 | 56.9832  | -2.26382 | 0.028169 | 0.999016 | -4.59493 |
| ERICH1    | -46.1316 | 248.4192 | -2.26297 | 0.028225 | 0.999016 | -4.59493 |
| NCK1-AS1  | -35.5572 | 175.5776 | -2.26184 | 0.0283   | 0.999016 | -4.59493 |
| TCEANC    | -17.3717 | 96.76827 | -2.26168 | 0.028311 | 0.999016 | -4.59493 |
| RP11-115A | -21.2713 | 46.80726 | -2.25891 | 0.028495 | 0.999016 | -4.59493 |
| CTU2      | -24.6571 | 129.7223 | -2.25873 | 0.028507 | 0.999016 | -4.59493 |
| RP11-38P2 | -47.0513 | 163.6705 | -2.2574  | 0.028596 | 0.999016 | -4.59493 |
| IL24      | -19.459  | 44.7747  | -2.25607 | 0.028685 | 0.999016 | -4.59494 |
| RP13-436F | -20.8177 | 49.76061 | -2.25592 | 0.028696 | 0.999016 | -4.59494 |
| LOC101921 | -11.3726 | 32.1549  | -2.25562 | 0.028716 | 0.999016 | -4.59494 |
| TSG101    | -774.676 | 5313.547 | -2.25522 | 0.028742 | 0.999016 | -4.59494 |
| ASAH2B    | -32.2236 | 212.1737 | -2.25237 | 0.028935 | 0.999016 | -4.59494 |
| RP11-385F | -33.0891 | 136.1689 | -2.25227 | 0.028942 | 0.999016 | -4.59494 |
| LOC100131 | -31.8746 | 126.763  | -2.25198 | 0.028962 | 0.999016 | -4.59494 |
| GFM1      | -262.506 | 1950.563 | -2.2515  | 0.028994 | 0.999016 | -4.59494 |
| LINC0061C | 13.86288 | 26.25306 | 2.25025  | 0.029079 | 0.999016 | -4.59494 |
| LOC100991 | 46.6621  | 230.93   | 2.248462 | 0.029201 | 0.999016 | -4.59494 |
| PPAP2C    | 42.98429 | 110.502  | 2.247827 | 0.029244 | 0.999016 | -4.59494 |
| SLC9C2    | -10.5911 | 42.31218 | -2.24587 | 0.029378 | 0.999016 | -4.59494 |
| FGF4      | -23.3281 | 90.06902 | -2.24566 | 0.029393 | 0.999016 | -4.59494 |
| LOC101921 | -5.83508 | 12.98896 | -2.24542 | 0.02941  | 0.999016 | -4.59494 |
| CAPN10-A  | -19.5221 | 75.36298 | -2.24186 | 0.029655 | 0.999016 | -4.59494 |
| LOC101921 | -32.746  | 92.27668 | -2.24162 | 0.029672 | 0.999016 | -4.59494 |
| NPVF      | -11.6667 | 19.54434 | -2.24129 | 0.029694 | 0.999016 | -4.59494 |
| LINC01222 | -16.3687 | 44.4854  | -2.23692 | 0.029998 | 0.999016 | -4.59494 |
| C2orf16   | -31.5351 | 121.7393 | -2.23671 | 0.030013 | 0.999016 | -4.59494 |
| KCNN2     | -114.035 | 298.2306 | -2.23516 | 0.030122 | 0.999016 | -4.59494 |
| GRTP1-AS  | -6.31262 | 7.97287  | -2.23418 | 0.030191 | 0.999016 | -4.59494 |
| LOC100281 | -7.97785 | 21.48855 | -2.23367 | 0.030227 | 0.999016 | -4.59494 |
| LINC01281 | -8.25375 | 12.12397 | -2.23348 | 0.03024  | 0.999016 | -4.59494 |
| MEF2D     | -42.1812 | 185.2586 | -2.23295 | 0.030278 | 0.999016 | -4.59494 |
| GPR112    | -12.4367 | 20.31563 | -2.22987 | 0.030495 | 0.999016 | -4.59494 |
| MZT2B     | -62.4947 | 433.2447 | -2.22843 | 0.030597 | 0.999016 | -4.59494 |
| CEMIP     | 16.07852 | 35.52339 | 2.226905 | 0.030706 | 0.999016 | -4.59494 |
| RP6-91H8  | -13.5462 | 39.21682 | -2.2246  | 0.030872 | 0.999016 | -4.59494 |
| PMM2      | 62.90476 | 300.3201 | 2.223047 | 0.030983 | 0.999016 | -4.59494 |
| FCGR2A    | 26.167   | 113.7598 | 2.221801 | 0.031073 | 0.999016 | -4.59494 |
| AX747031  | -13.7388 | 36.75262 | -2.22088 | 0.031139 | 0.999016 | -4.59494 |
| FLG       | -7.53391 | 17.49153 | -2.22077 | 0.031147 | 0.999016 | -4.59494 |
| RSG1      | -33.4978 | 216.7808 | -2.22001 | 0.031202 | 0.999016 | -4.59494 |
| SLMO1     | 19.71768 | 49.90597 | 2.217334 | 0.031397 | 0.999016 | -4.59494 |
| ITGB6     | 296.8197 | 792.4612 | 2.211779 | 0.031803 | 0.999016 | -4.59494 |
| OSMR      | 105.1191 | 496.5308 | 2.211777 | 0.031803 | 0.999016 | -4.59494 |
| MS4A4A    | 182.8538 | 533.7856 | 2.210065 | 0.03193  | 0.999016 | -4.59494 |
| CMC4      | -20.5997 | 55.80842 | -2.20989 | 0.031943 | 0.999016 | -4.59494 |
| STPG2     | -30.9376 | 99.33267 | -2.20931 | 0.031986 | 0.999016 | -4.59494 |
| HLA-DPB1  | 1225.418 | 3212.141 | 2.208492 | 0.032046 | 0.999016 | -4.59494 |
| ADAM3B    | -9.6793  | 19.29146 | -2.20697 | 0.032159 | 0.999016 | -4.59494 |

|           |          |          |          |          |          |          |
|-----------|----------|----------|----------|----------|----------|----------|
| GS1-164F2 | -29.7779 | 105.5576 | -2.20629 | 0.03221  | 0.999016 | -4.59494 |
| NNAT      | -32.7762 | 95.51243 | -2.20566 | 0.032257 | 0.999016 | -4.59494 |
| CCDC152   | -170.798 | 991.8894 | -2.20489 | 0.032314 | 0.999016 | -4.59494 |
| PABPC1P1  | -42.0801 | 130.9146 | -2.20403 | 0.032379 | 0.999016 | -4.59494 |
| LINC00572 | -17.2874 | 66.22836 | -2.20348 | 0.03242  | 0.999016 | -4.59494 |
| GNRH2     | -16.6185 | 38.0179  | -2.20344 | 0.032423 | 0.999016 | -4.59494 |
| VPS13A-A  | -18.4825 | 46.95945 | -2.2033  | 0.032433 | 0.999016 | -4.59494 |
| ATN1      | -16.0827 | 89.08095 | -2.2029  | 0.032463 | 0.999016 | -4.59495 |
| ZNF428    | -15.9531 | 54.14934 | -2.2023  | 0.032509 | 0.999016 | -4.59495 |
| ZFAND6    | -534.861 | 3822.185 | -2.20138 | 0.032577 | 0.999016 | -4.59495 |
| XDH       | -27.3076 | 106.416  | -2.19998 | 0.032683 | 0.999016 | -4.59495 |
| VPS9D1-A  | -32.7937 | 106.2756 | -2.19935 | 0.03273  | 0.999016 | -4.59495 |
| WFDC2     | 351.5735 | 956.0483 | 2.199251 | 0.032738 | 0.999016 | -4.59495 |
| NRG2      | -13.1137 | 47.60323 | -2.19858 | 0.032789 | 0.999016 | -4.59495 |
| DEFB108B  | -8.41746 | 9.938004 | -2.19824 | 0.032815 | 0.999016 | -4.59495 |
| ANKMY1    | -11.3532 | 42.77997 | -2.19706 | 0.032904 | 0.999016 | -4.59495 |
| LOC101921 | 9.760678 | 22.96549 | 2.195875 | 0.032994 | 0.999016 | -4.59495 |
| PRKAA2    | -210.61  | 1078.331 | -2.19567 | 0.03301  | 0.999016 | -4.59495 |
| TEX40     | -54.4617 | 167.3817 | -2.19472 | 0.033082 | 0.999016 | -4.59495 |
| GPT2      | -214.691 | 727.8316 | -2.18961 | 0.033474 | 0.999016 | -4.59495 |
| GPR83     | -28.3821 | 67.28078 | -2.18731 | 0.033651 | 0.999016 | -4.59495 |
| HIST1H4I  | -23.7476 | 73.14314 | -2.18655 | 0.03371  | 0.999016 | -4.59495 |
| HIST1H2BM | -15.7625 | 45.01183 | -2.18396 | 0.033911 | 0.999016 | -4.59495 |
| SLCO4A1-  | -26.2982 | 77.5182  | -2.18126 | 0.034123 | 0.999016 | -4.59495 |
| LOC101921 | -22.5171 | 61.54834 | -2.17856 | 0.034334 | 0.999016 | -4.59495 |
| CHRD12    | -12.1369 | 28.50165 | -2.17836 | 0.03435  | 0.999016 | -4.59495 |
| FOXA1     | -7.58683 | 18.51877 | -2.17689 | 0.034467 | 0.999016 | -4.59495 |
| C11orf74  | -159.664 | 834.0212 | -2.1759  | 0.034545 | 0.999016 | -4.59495 |
| EPHA1-AS  | -10.3374 | 32.68125 | -2.17502 | 0.034615 | 0.999016 | -4.59495 |
| NPHP1     | -22.9698 | 109.9306 | -2.1745  | 0.034656 | 0.999016 | -4.59495 |
| TMEM155   | -16.8162 | 38.4584  | -2.17435 | 0.034668 | 0.999016 | -4.59495 |
| ZNF132    | -17.7008 | 102.938  | -2.17335 | 0.034748 | 0.999016 | -4.59495 |
| RHOT1     | -174.577 | 1224.709 | -2.17153 | 0.034892 | 0.999016 | -4.59495 |
| CEBPZOS   | -39.1934 | 253.5327 | -2.17112 | 0.034926 | 0.999016 | -4.59495 |
| NAALAD2   | -9.2873  | 48.95844 | -2.17095 | 0.03494  | 0.999016 | -4.59495 |
| LOC643071 | -24.1623 | 131.3994 | -2.16964 | 0.035044 | 0.999016 | -4.59495 |
| STX1B     | -10.2581 | 31.85342 | -2.16934 | 0.035068 | 0.999016 | -4.59495 |
| EFCAB3    | 5.374274 | 8.122737 | 2.168001 | 0.035176 | 0.999016 | -4.59495 |
| MAGOH2    | -24.1979 | 149.4721 | -2.16542 | 0.035384 | 0.999016 | -4.59495 |
| KIAA0319  | -9.26592 | 24.39026 | -2.165   | 0.035418 | 0.999016 | -4.59495 |
| CCT8L2    | -15.0792 | 26.22514 | -2.16421 | 0.035483 | 0.999016 | -4.59495 |
| PRDM8     | -5.13688 | 12.29226 | -2.16306 | 0.035576 | 0.999016 | -4.59495 |
| DGCR7     | -8.65852 | 31.01539 | -2.1628  | 0.035597 | 0.999016 | -4.59495 |
| VSIG4     | 176.3711 | 693.8659 | 2.16098  | 0.035745 | 0.999016 | -4.59495 |
| BC037214  | -14.0146 | 26.90659 | -2.16071 | 0.035767 | 0.999016 | -4.59495 |
| NEK10     | -21.6313 | 74.35632 | -2.16048 | 0.035786 | 0.999016 | -4.59495 |
| RFESD     | -27.6968 | 138.6565 | -2.15883 | 0.035921 | 0.999016 | -4.59495 |
| BARX1-AS  | -11.691  | 25.86138 | -2.15663 | 0.036102 | 0.999016 | -4.59495 |
| CTD-3203I | -14.2427 | 29.4599  | -2.15573 | 0.036176 | 0.999016 | -4.59495 |
| PLD5      | -14.2127 | 52.55438 | -2.15409 | 0.036312 | 0.999016 | -4.59495 |
| RS1       | -10.5306 | 37.44666 | -2.15253 | 0.03644  | 0.999016 | -4.59495 |
| PSORS1C2  | -8.62667 | 29.77475 | -2.14939 | 0.036702 | 0.999016 | -4.59495 |
| ERMARD    | -134.094 | 985.2704 | -2.1475  | 0.036861 | 0.999016 | -4.59496 |
| LOC101921 | -13.1865 | 29.73753 | -2.14609 | 0.036979 | 0.999016 | -4.59496 |
| DPP9      | -34.6097 | 169.561  | -2.14581 | 0.037003 | 0.999016 | -4.59496 |
| CSMD3     | -10.7922 | 33.58525 | -2.14437 | 0.037124 | 0.999016 | -4.59496 |
| MIR6834   | -78.5707 | 399.1272 | -2.14312 | 0.03723  | 0.999016 | -4.59496 |
| RP11-769C | -15.0007 | 55.3409  | -2.14232 | 0.037297 | 0.999016 | -4.59496 |

|           |          |          |          |          |          |          |
|-----------|----------|----------|----------|----------|----------|----------|
| LINC00652 | -13.657  | 27.7179  | -2.14222 | 0.037306 | 0.999016 | -4.59496 |
| NKX3-1    | -27.6924 | 128.762  | -2.14162 | 0.037356 | 0.999016 | -4.59496 |
| DLX3      | -15.1844 | 28.16004 | -2.14148 | 0.037369 | 0.999016 | -4.59496 |
| FGF6      | -30.818  | 73.21844 | -2.14115 | 0.037397 | 0.999016 | -4.59496 |
| FAM209B   | -20.6752 | 101.4988 | -2.14044 | 0.037457 | 0.999016 | -4.59496 |
| SLC25A2   | -13.6637 | 48.42635 | -2.13707 | 0.037745 | 0.999016 | -4.59496 |
| UBBP1     | -381.582 | 1953.638 | -2.1354  | 0.037888 | 0.999016 | -4.59496 |
| TPTEP1    | -25.2451 | 139.7971 | -2.13519 | 0.037906 | 0.999016 | -4.59496 |
| LOC101921 | 8.258715 | 14.18271 | 2.133182 | 0.038079 | 0.999016 | -4.59496 |
| VMP1      | 82.47041 | 303.4495 | 2.133155 | 0.038081 | 0.999016 | -4.59496 |
| LOC101921 | -90.7832 | 383.1477 | -2.13244 | 0.038143 | 0.999016 | -4.59496 |
| MBD3L2    | 6.029723 | 12.66658 | 2.13197  | 0.038184 | 0.999016 | -4.59496 |
| CLPX      | -176.061 | 1345.087 | -2.1315  | 0.038224 | 0.999016 | -4.59496 |
| BC042022  | -9.40923 | 23.29403 | -2.12985 | 0.038367 | 0.999016 | -4.59496 |
| C10orf113 | -17.179  | 27.59252 | -2.12935 | 0.038411 | 0.999016 | -4.59496 |
| REG3G     | 17.22315 | 51.4322  | 2.128476 | 0.038487 | 0.999016 | -4.59496 |
| RP11-334C | 31.85064 | 140.7381 | 2.127679 | 0.038557 | 0.999016 | -4.59496 |
| MISP      | 116.2783 | 388.7865 | 2.125491 | 0.038748 | 0.999016 | -4.59496 |
| LINC00599 | -10.9682 | 40.33918 | -2.12442 | 0.038842 | 0.999016 | -4.59496 |
| FLJ38668  | -27.1271 | 116.9803 | -2.12399 | 0.03888  | 0.999016 | -4.59496 |
| ATP5S     | -48.4516 | 282.7621 | -2.1233  | 0.03894  | 0.999016 | -4.59496 |
| SFN       | 60.67745 | 292.6317 | 2.122574 | 0.039004 | 0.999016 | -4.59496 |
| CPNE7     | -46.3584 | 186.8871 | -2.12115 | 0.03913  | 0.999016 | -4.59496 |
| UGGT1     | -64.3844 | 472.9783 | -2.12113 | 0.039132 | 0.999016 | -4.59496 |
| PDAP1     | -20.7491 | 96.86171 | -2.11938 | 0.039286 | 0.999016 | -4.59496 |
| RP11-203E | -11.562  | 22.47979 | -2.11869 | 0.039348 | 0.999016 | -4.59496 |
| GOLGA8C   | -65.8659 | 395.1359 | -2.11855 | 0.03936  | 0.999016 | -4.59496 |
| LOC101921 | -11.7363 | 26.38872 | -2.11813 | 0.039398 | 0.999016 | -4.59496 |
| KNOP1     | -34.2493 | 239.8059 | -2.11805 | 0.039405 | 0.999016 | -4.59496 |
| CHRFAM7   | 21.57012 | 52.60623 | 2.118048 | 0.039405 | 0.999016 | -4.59496 |
| CHAMP1    | -37.9171 | 316.233  | -2.11792 | 0.039417 | 0.999016 | -4.59496 |
| TEX41     | -14.6173 | 45.20852 | -2.11749 | 0.039454 | 0.999016 | -4.59496 |
| DDN       | -152.788 | 253.4016 | -2.11717 | 0.039483 | 0.999016 | -4.59496 |
| CFB       | 112.5014 | 442.9338 | 2.115998 | 0.039588 | 0.999016 | -4.59496 |
| NDUFAF4   | -205.655 | 1321.913 | -2.11585 | 0.039601 | 0.999016 | -4.59496 |
| WI2-89031 | -9.17231 | 18.52558 | -2.11504 | 0.039674 | 0.999016 | -4.59496 |
| LOC100131 | -10.358  | 36.31146 | -2.11368 | 0.039795 | 0.999016 | -4.59496 |
| NXPH3     | -28.7821 | 132.8728 | -2.11352 | 0.039809 | 0.999016 | -4.59496 |
| KRT78     | -8.27224 | 24.85172 | -2.11338 | 0.039822 | 0.999016 | -4.59496 |
| ELAVL3    | -5.22628 | 15.7816  | -2.1117  | 0.039973 | 0.999016 | -4.59496 |
| LOC101921 | -8.0079  | 31.81648 | -2.11134 | 0.040006 | 0.999016 | -4.59496 |
| LOC100501 | 8.100327 | 16.18083 | 2.110696 | 0.040064 | 0.999016 | -4.59496 |
| ZNF595    | -68.2458 | 98.31985 | -2.11015 | 0.040113 | 0.999016 | -4.59496 |
| C1QC      | 102.5785 | 325.9824 | 2.109804 | 0.040144 | 0.999016 | -4.59496 |
| MTRF1     | -28.6853 | 214.9408 | -2.10891 | 0.040226 | 0.999016 | -4.59496 |
| LIP1      | 7.889029 | 20.52239 | 2.108723 | 0.040242 | 0.999016 | -4.59496 |
| SHISA2    | -84.0845 | 379.1415 | -2.1087  | 0.040245 | 0.999016 | -4.59496 |
| LARP4B    | -41.8304 | 336.3588 | -2.10839 | 0.040272 | 0.999016 | -4.59496 |
| LOC102721 | -12.0847 | 26.10706 | -2.10776 | 0.04033  | 0.999016 | -4.59496 |
| RP11-255C | -15.7331 | 80.87969 | -2.1039  | 0.040681 | 0.999016 | -4.59496 |
| CTNNA2    | -10.8783 | 28.61399 | -2.10335 | 0.040732 | 0.999016 | -4.59496 |
| UBQLN3    | -12.4683 | 23.20491 | -2.10269 | 0.040792 | 0.999016 | -4.59496 |
| BPIFB9P   | -17.43   | 42.33038 | -2.10226 | 0.040831 | 0.999016 | -4.59496 |
| ACTR3B    | -43.1229 | 296.3974 | -2.10219 | 0.040838 | 0.999016 | -4.59496 |
| LOC339871 | -11.2883 | 45.74674 | -2.10192 | 0.040863 | 0.999016 | -4.59496 |
| RP11-359K | 7.277704 | 12.80685 | 2.1018   | 0.040874 | 0.999016 | -4.59496 |
| BC040311  | -5.95592 | 9.719448 | -2.10111 | 0.040937 | 0.999016 | -4.59496 |
| PF4V1     | -13.6322 | 58.01229 | -2.10069 | 0.040975 | 0.999016 | -4.59496 |



|            |          |          |          |          |          |          |
|------------|----------|----------|----------|----------|----------|----------|
| SPAM1      | -12.4525 | 46.87129 | -2.1006  | 0.040984 | 0.999016 | -4.59496 |
| FAM57A     | 47.74656 | 196.9578 | 2.100537 | 0.04099  | 0.999016 | -4.59496 |
| LOC642621  | -8.78738 | 14.38269 | -2.09981 | 0.041057 | 0.999016 | -4.59496 |
| FAM27E2    | -29.5332 | 158.7025 | -2.09973 | 0.041064 | 0.999016 | -4.59496 |
| ZNF718     | 26.08586 | 100.6349 | 2.098119 | 0.041213 | 0.999016 | -4.59496 |
| C1orf145   | -10.4332 | 35.12583 | -2.0974  | 0.04128  | 0.999016 | -4.59496 |
| LRIG1      | -27.5581 | 171.5806 | -2.09595 | 0.041414 | 0.999016 | -4.59496 |
| LOC101931  | -14.8104 | 55.85691 | -2.09441 | 0.041558 | 0.999016 | -4.59496 |
| AIMP2      | -368.821 | 2128.722 | -2.09385 | 0.04161  | 0.999016 | -4.59496 |
| HBZ        | -7.97029 | 14.5471  | -2.0919  | 0.041791 | 0.999016 | -4.59497 |
| PIH2       | 6.825511 | 18.22229 | 2.091415 | 0.041837 | 0.999016 | -4.59497 |
| OIT3       | -11.6394 | 30.51905 | -2.09122 | 0.041856 | 0.999016 | -4.59497 |
| ST3GAL3    | -21.2668 | 123.6356 | -2.09104 | 0.041872 | 0.999016 | -4.59497 |
| PCDHB18    | -11.3826 | 35.47693 | -2.09068 | 0.041906 | 0.999016 | -4.59497 |
| LOC101921  | 6.606328 | 7.868341 | 2.090653 | 0.041909 | 0.999016 | -4.59497 |
| KRTAP2-1   | 5.903143 | 8.128912 | 2.08968  | 0.042    | 0.999016 | -4.59497 |
| LOC286351  | -18.0184 | 76.2764  | -2.08671 | 0.04228  | 0.999016 | -4.59497 |
| ARHGEF37   | -55.6942 | 372.1733 | -2.08671 | 0.04228  | 0.999016 | -4.59497 |
| OR4D2      | -22.7038 | 67.95607 | -2.08442 | 0.042497 | 0.999016 | -4.59497 |
| C21orf91-1 | -11.2594 | 43.47918 | -2.08373 | 0.042563 | 0.999016 | -4.59497 |
| SSU72      | -134.784 | 1062.552 | -2.08333 | 0.042601 | 0.999016 | -4.59497 |
| CDNF       | -33.3349 | 105.0825 | -2.08309 | 0.042623 | 0.999016 | -4.59497 |
| GRM7       | -11.7912 | 35.87608 | -2.0804  | 0.04288  | 0.999016 | -4.59497 |
| AX746699   | -10.7742 | 22.27707 | -2.07952 | 0.042965 | 0.999016 | -4.59497 |
| PCBD2      | -61.6773 | 429.0792 | -2.07937 | 0.042979 | 0.999016 | -4.59497 |
| BOLL       | -21.3854 | 75.0534  | -2.07852 | 0.043061 | 0.999016 | -4.59497 |
| RP11-731J  | -9.15202 | 36.22632 | -2.07727 | 0.043181 | 0.999016 | -4.59497 |
| PLCL2      | -143.947 | 1015.565 | -2.07671 | 0.043235 | 0.999016 | -4.59497 |
| SNCB       | -8.08603 | 20.6596  | -2.0747  | 0.04343  | 0.999016 | -4.59497 |
| MRPL30     | -117.675 | 917.5907 | -2.07418 | 0.04348  | 0.999016 | -4.59497 |
| BTBD18     | -24.4704 | 107.5057 | -2.07365 | 0.043532 | 0.999016 | -4.59497 |
| LOC553101  | -35.1588 | 195.2573 | -2.07297 | 0.043598 | 0.999016 | -4.59497 |
| RP11-489E  | -13.0488 | 56.36056 | -2.07176 | 0.043715 | 0.999016 | -4.59497 |
| LINC01339  | -26.7601 | 78.84137 | -2.07169 | 0.043722 | 0.999016 | -4.59497 |
| ZSCAN20    | -12.1004 | 71.08058 | -2.07167 | 0.043724 | 0.999016 | -4.59497 |
| ISOC1      | -885.816 | 5370.868 | -2.06866 | 0.044017 | 0.999016 | -4.59497 |
| C12orf80   | -14.8419 | 55.54936 | -2.06863 | 0.044021 | 0.999016 | -4.59497 |
| TRIML2     | -6.20587 | 8.741109 | -2.0684  | 0.044043 | 0.999016 | -4.59497 |
| IMMP1L     | -128.041 | 900.6386 | -2.06713 | 0.044168 | 0.999016 | -4.59497 |
| LOC101921  | -22.1791 | 86.34621 | -2.06625 | 0.044254 | 0.999016 | -4.59497 |
| CTD-20351  | -16.8912 | 50.4694  | -2.06611 | 0.044268 | 0.999016 | -4.59497 |
| LOC101921  | -16.8343 | 37.04153 | -2.06533 | 0.044345 | 0.999016 | -4.59497 |
| GNB1L      | -18.142  | 75.22807 | -2.06473 | 0.044404 | 0.999016 | -4.59497 |
| ADAMTS19   | -6.27391 | 14.76501 | -2.06342 | 0.044534 | 0.999016 | -4.59497 |
| RP4-798A1  | -42.4182 | 215.5622 | -2.06337 | 0.044539 | 0.999016 | -4.59497 |
| SLC17A8    | 15.73018 | 20.5585  | 2.062235 | 0.044651 | 0.999016 | -4.59497 |
| LOC283481  | -8.5475  | 21.85248 | -2.06169 | 0.044705 | 0.999016 | -4.59497 |
| MEG8       | -8.5241  | 15.17601 | -2.06149 | 0.044725 | 0.999016 | -4.59497 |
| LTF        | 1077.139 | 1005.069 | 2.061476 | 0.044727 | 0.999016 | -4.59497 |
| LOC254891  | -21.3862 | 78.66156 | -2.06127 | 0.044748 | 0.999016 | -4.59497 |
| LSM14B     | -13.4502 | 80.22399 | -2.06081 | 0.044792 | 0.999016 | -4.59497 |
| CCDC89     | 14.76318 | 64.27994 | 2.060765 | 0.044797 | 0.999016 | -4.59497 |
| PRO1483    | 7.254376 | 12.59659 | 2.060658 | 0.044808 | 0.999016 | -4.59497 |
| NOP58      | -348.982 | 2630.944 | -2.06058 | 0.044816 | 0.999016 | -4.59497 |
| PRAMEF10   | -23.9378 | 53.20705 | -2.05998 | 0.044876 | 0.999016 | -4.59497 |
| LINC00115  | -16.2908 | 90.02246 | -2.05975 | 0.044898 | 0.999016 | -4.59497 |
| PDCD5      | -39.5839 | 278.1812 | -2.05902 | 0.044971 | 0.999016 | -4.59497 |
| PITPNM3    | -22.6898 | 119.5903 | -2.05782 | 0.045091 | 0.999016 | -4.59497 |

|            |          |          |          |          |          |          |
|------------|----------|----------|----------|----------|----------|----------|
| PTPRU      | -62.8245 | 267.6208 | -2.05775 | 0.045098 | 0.999016 | -4.59497 |
| FSIP1      | 12.34836 | 38.13124 | 2.057584 | 0.045115 | 0.999016 | -4.59497 |
| NDUFB6     | -527.95  | 2684.235 | -2.05747 | 0.045126 | 0.999016 | -4.59497 |
| ZNF354B    | -51.5935 | 249.6726 | -2.05531 | 0.045343 | 0.999016 | -4.59497 |
| NPHP3-AS   | -11.2357 | 32.62829 | -2.05228 | 0.045648 | 0.999016 | -4.59497 |
| KY         | -32.7375 | 72.79133 | -2.05215 | 0.045662 | 0.999016 | -4.59497 |
| TIMM8A     | -41.0228 | 222.4939 | -2.05204 | 0.045673 | 0.999016 | -4.59497 |
| DPCR1      | -9.17176 | 29.09051 | -2.05154 | 0.045723 | 0.999016 | -4.59497 |
| ABHD17B    | -118.917 | 855.9923 | -2.0511  | 0.045768 | 0.999016 | -4.59497 |
| LOC101921  | -10.0162 | 14.00285 | -2.05109 | 0.045769 | 0.999016 | -4.59497 |
| ATP5J      | -2226.44 | 15134.68 | -2.05077 | 0.045802 | 0.999016 | -4.59497 |
| FAM221A    | -60.9315 | 308.3719 | -2.04952 | 0.045928 | 0.999016 | -4.59497 |
| SFRP1      | 523.9286 | 2619.97  | 2.049168 | 0.045964 | 0.999016 | -4.59497 |
| LOC101921  | -21.615  | 66.27353 | -2.04836 | 0.046046 | 0.999016 | -4.59497 |
| LOC102721  | -20.7474 | 40.2712  | -2.04803 | 0.04608  | 0.999016 | -4.59497 |
| RP11-167H  | -17.9344 | 40.93475 | -2.0476  | 0.046124 | 0.999016 | -4.59497 |
| LINC00673  | -13.0465 | 26.02674 | -2.04711 | 0.046174 | 0.999016 | -4.59497 |
| NFE4       | -10.7316 | 21.88654 | -2.04629 | 0.046257 | 0.999016 | -4.59497 |
| LOC285761  | -14.6895 | 48.99688 | -2.04563 | 0.046325 | 0.999016 | -4.59497 |
| AC083949   | -21.5433 | 72.37815 | -2.04457 | 0.046434 | 0.999016 | -4.59497 |
| LOC101921  | -14.4089 | 27.29844 | -2.04429 | 0.046463 | 0.999016 | -4.59497 |
| FIBCD1     | -8.92509 | 27.36742 | -2.04412 | 0.04648  | 0.999016 | -4.59497 |
| KRTAP5-2   | -18.2433 | 50.9765  | -2.044   | 0.046492 | 0.999016 | -4.59497 |
| CCL24      | -16.8053 | 34.38346 | -2.04387 | 0.046505 | 0.999016 | -4.59497 |
| SLC34A2    | 133.542  | 348.1631 | 2.042808 | 0.046615 | 0.999016 | -4.59497 |
| CFLAR      | -83.387  | 716.6289 | -2.0427  | 0.046626 | 0.999016 | -4.59497 |
| RP11-195M  | -27.8782 | 118.5887 | -2.04269 | 0.046627 | 0.999016 | -4.59497 |
| SPRYD7     | -47.5511 | 259.4328 | -2.04247 | 0.04665  | 0.999016 | -4.59497 |
| LOC101921  | -12.1949 | 36.51449 | -2.04242 | 0.046655 | 0.999016 | -4.59497 |
| ASMTL-AS   | -14.1517 | 84.47016 | -2.04155 | 0.046745 | 0.999016 | -4.59497 |
| LOC28608   | 8.751507 | 20.16817 | 2.041453 | 0.046755 | 0.999016 | -4.59497 |
| SPG20      | -132.771 | 972.4857 | -2.04124 | 0.046777 | 0.999016 | -4.59497 |
| RLTPR      | 13.35625 | 44.82716 | 2.03986  | 0.046919 | 0.999016 | -4.59497 |
| DNAJC9-A   | -32.1691 | 130.9254 | -2.03884 | 0.047025 | 0.999016 | -4.59497 |
| SELP       | 142.5924 | 630.7433 | 2.038007 | 0.047112 | 0.999016 | -4.59497 |
| LRRC4C     | -14.6635 | 64.31855 | -2.03754 | 0.047161 | 0.999016 | -4.59497 |
| CECR5-AS   | 12.32913 | 30.95826 | 2.036945 | 0.047222 | 0.999016 | -4.59498 |
| CHEK1      | -22.0506 | 159.9965 | -2.03584 | 0.047337 | 0.999016 | -4.59498 |
| PCNXL4     | -38.4475 | 295.1132 | -2.03462 | 0.047464 | 0.999016 | -4.59498 |
| T-18       | -11.2308 | 38.71188 | -2.03432 | 0.047496 | 0.999016 | -4.59498 |
| INTS2      | -51.6657 | 310.9425 | -2.03412 | 0.047517 | 0.999016 | -4.59498 |
| LOC100501  | -20.8312 | 76.98359 | -2.03254 | 0.047683 | 0.999016 | -4.59498 |
| FUBP3      | -136.747 | 854.1586 | -2.03079 | 0.047867 | 0.999016 | -4.59498 |
| EGF        | -1696    | 4737.993 | -2.02798 | 0.048163 | 0.999016 | -4.59498 |
| ASH2L      | -295.301 | 1854.277 | -2.02697 | 0.048271 | 0.999016 | -4.59498 |
| FAM205A    | -8.34039 | 20.29565 | -2.02542 | 0.048435 | 0.999016 | -4.59498 |
| CPEB4      | -279.827 | 1698.378 | -2.02524 | 0.048455 | 0.999016 | -4.59498 |
| SIGLEC16   | -11.3455 | 21.41081 | -2.02524 | 0.048455 | 0.999016 | -4.59498 |
| GS1-24F4.. | -12.6719 | 24.54733 | -2.02486 | 0.048495 | 0.999016 | -4.59498 |
| C19orf73   | -24.2638 | 55.82575 | -2.02471 | 0.048511 | 0.999016 | -4.59498 |
| BC042825   | -7.27916 | 12.8525  | -2.02425 | 0.048561 | 0.999016 | -4.59498 |
| ALS2CL     | -50.9604 | 295.1632 | -2.02399 | 0.048588 | 0.999016 | -4.59498 |
| SRMP1      | 23.96854 | 55.79644 | 2.023729 | 0.048616 | 0.999016 | -4.59498 |
| ESCO2      | -6.51486 | 27.42492 | -2.02338 | 0.048653 | 0.999016 | -4.59498 |
| PRND       | -13.5014 | 45.50118 | -2.0228  | 0.048715 | 0.999016 | -4.59498 |
| RP3-337H4  | -12.6221 | 39.06052 | -2.02238 | 0.04876  | 0.999016 | -4.59498 |
| LINC00086  | -276.224 | 1720.849 | -2.0222  | 0.04878  | 0.999016 | -4.59498 |
| MTCL1      | 85.99695 | 461.7978 | 2.021597 | 0.048844 | 0.999016 | -4.59498 |

|           |          |          |          |          |          |          |
|-----------|----------|----------|----------|----------|----------|----------|
| LOC284661 | -9.47091 | 42.62485 | -2.02125 | 0.048881 | 0.999016 | -4.59498 |
| PDX1      | -6.36787 | 23.31242 | -2.02096 | 0.048913 | 0.999016 | -4.59498 |
| PLGLB1    | -50.9346 | 272.6725 | -2.02046 | 0.048966 | 0.999016 | -4.59498 |
| TOP2A     | 10.56155 | 33.73787 | 2.020286 | 0.048985 | 0.999016 | -4.59498 |
| FSTL5     | -13.6245 | 20.98028 | -2.0199  | 0.049026 | 0.999016 | -4.59498 |
| AGR2      | 47.8039  | 151.0285 | 2.019652 | 0.049053 | 0.999016 | -4.59498 |
| BC043223  | -14.4756 | 36.40796 | -2.01883 | 0.049142 | 0.999016 | -4.59498 |
| MYC       | 71.36436 | 256.085  | 2.018541 | 0.049173 | 0.999016 | -4.59498 |
| CYP4F62P  | -13.1934 | 21.86377 | -2.0181  | 0.049221 | 0.999016 | -4.59498 |
| OR2S2     | -17.5739 | 64.09716 | -2.01737 | 0.049299 | 0.999016 | -4.59498 |
| LOC643081 | -19.9796 | 70.30488 | -2.01652 | 0.049391 | 0.999016 | -4.59498 |
| CFTR      | 6.899075 | 22.7315  | 2.015777 | 0.049472 | 0.999016 | -4.59498 |
| GRIP2     | -91.8463 | 271.7164 | -2.01552 | 0.0495   | 0.999016 | -4.59498 |
| STRIP2    | -53.0096 | 117.8941 | -2.01544 | 0.049508 | 0.999016 | -4.59498 |
| DMBT1     | -50.5416 | 232.1294 | -2.0148  | 0.049578 | 0.999016 | -4.59498 |
| SLC19A2   | -463.485 | 1925.718 | -2.0147  | 0.049588 | 0.999016 | -4.59498 |
| PRR34-AS1 | -389.514 | 1811.727 | -2.01377 | 0.04969  | 0.999016 | -4.59498 |
| ADORA1    | -22.5853 | 116.6643 | -2.01353 | 0.049716 | 0.999016 | -4.59498 |
| TRAPPC1   | 104.5071 | 482.0578 | 2.01209  | 0.049873 | 0.999016 | -4.59498 |
| TMEM196   | 5.881105 | 17.29268 | 2.011602 | 0.049926 | 0.999016 | -4.59498 |
| AX747444  | -13.3527 | 40.22705 | -2.01153 | 0.049934 | 0.999016 | -4.59498 |
