# Supplementary figures and images for: The Potential Diagnostic Value of Immune-Related Genes in Interstitial Fibrosis and Tubular Atrophy after Kidney Transplantation
Source: Hindawi journal article supplement (doi:10.1155/2022/7212852), 2022-06-17

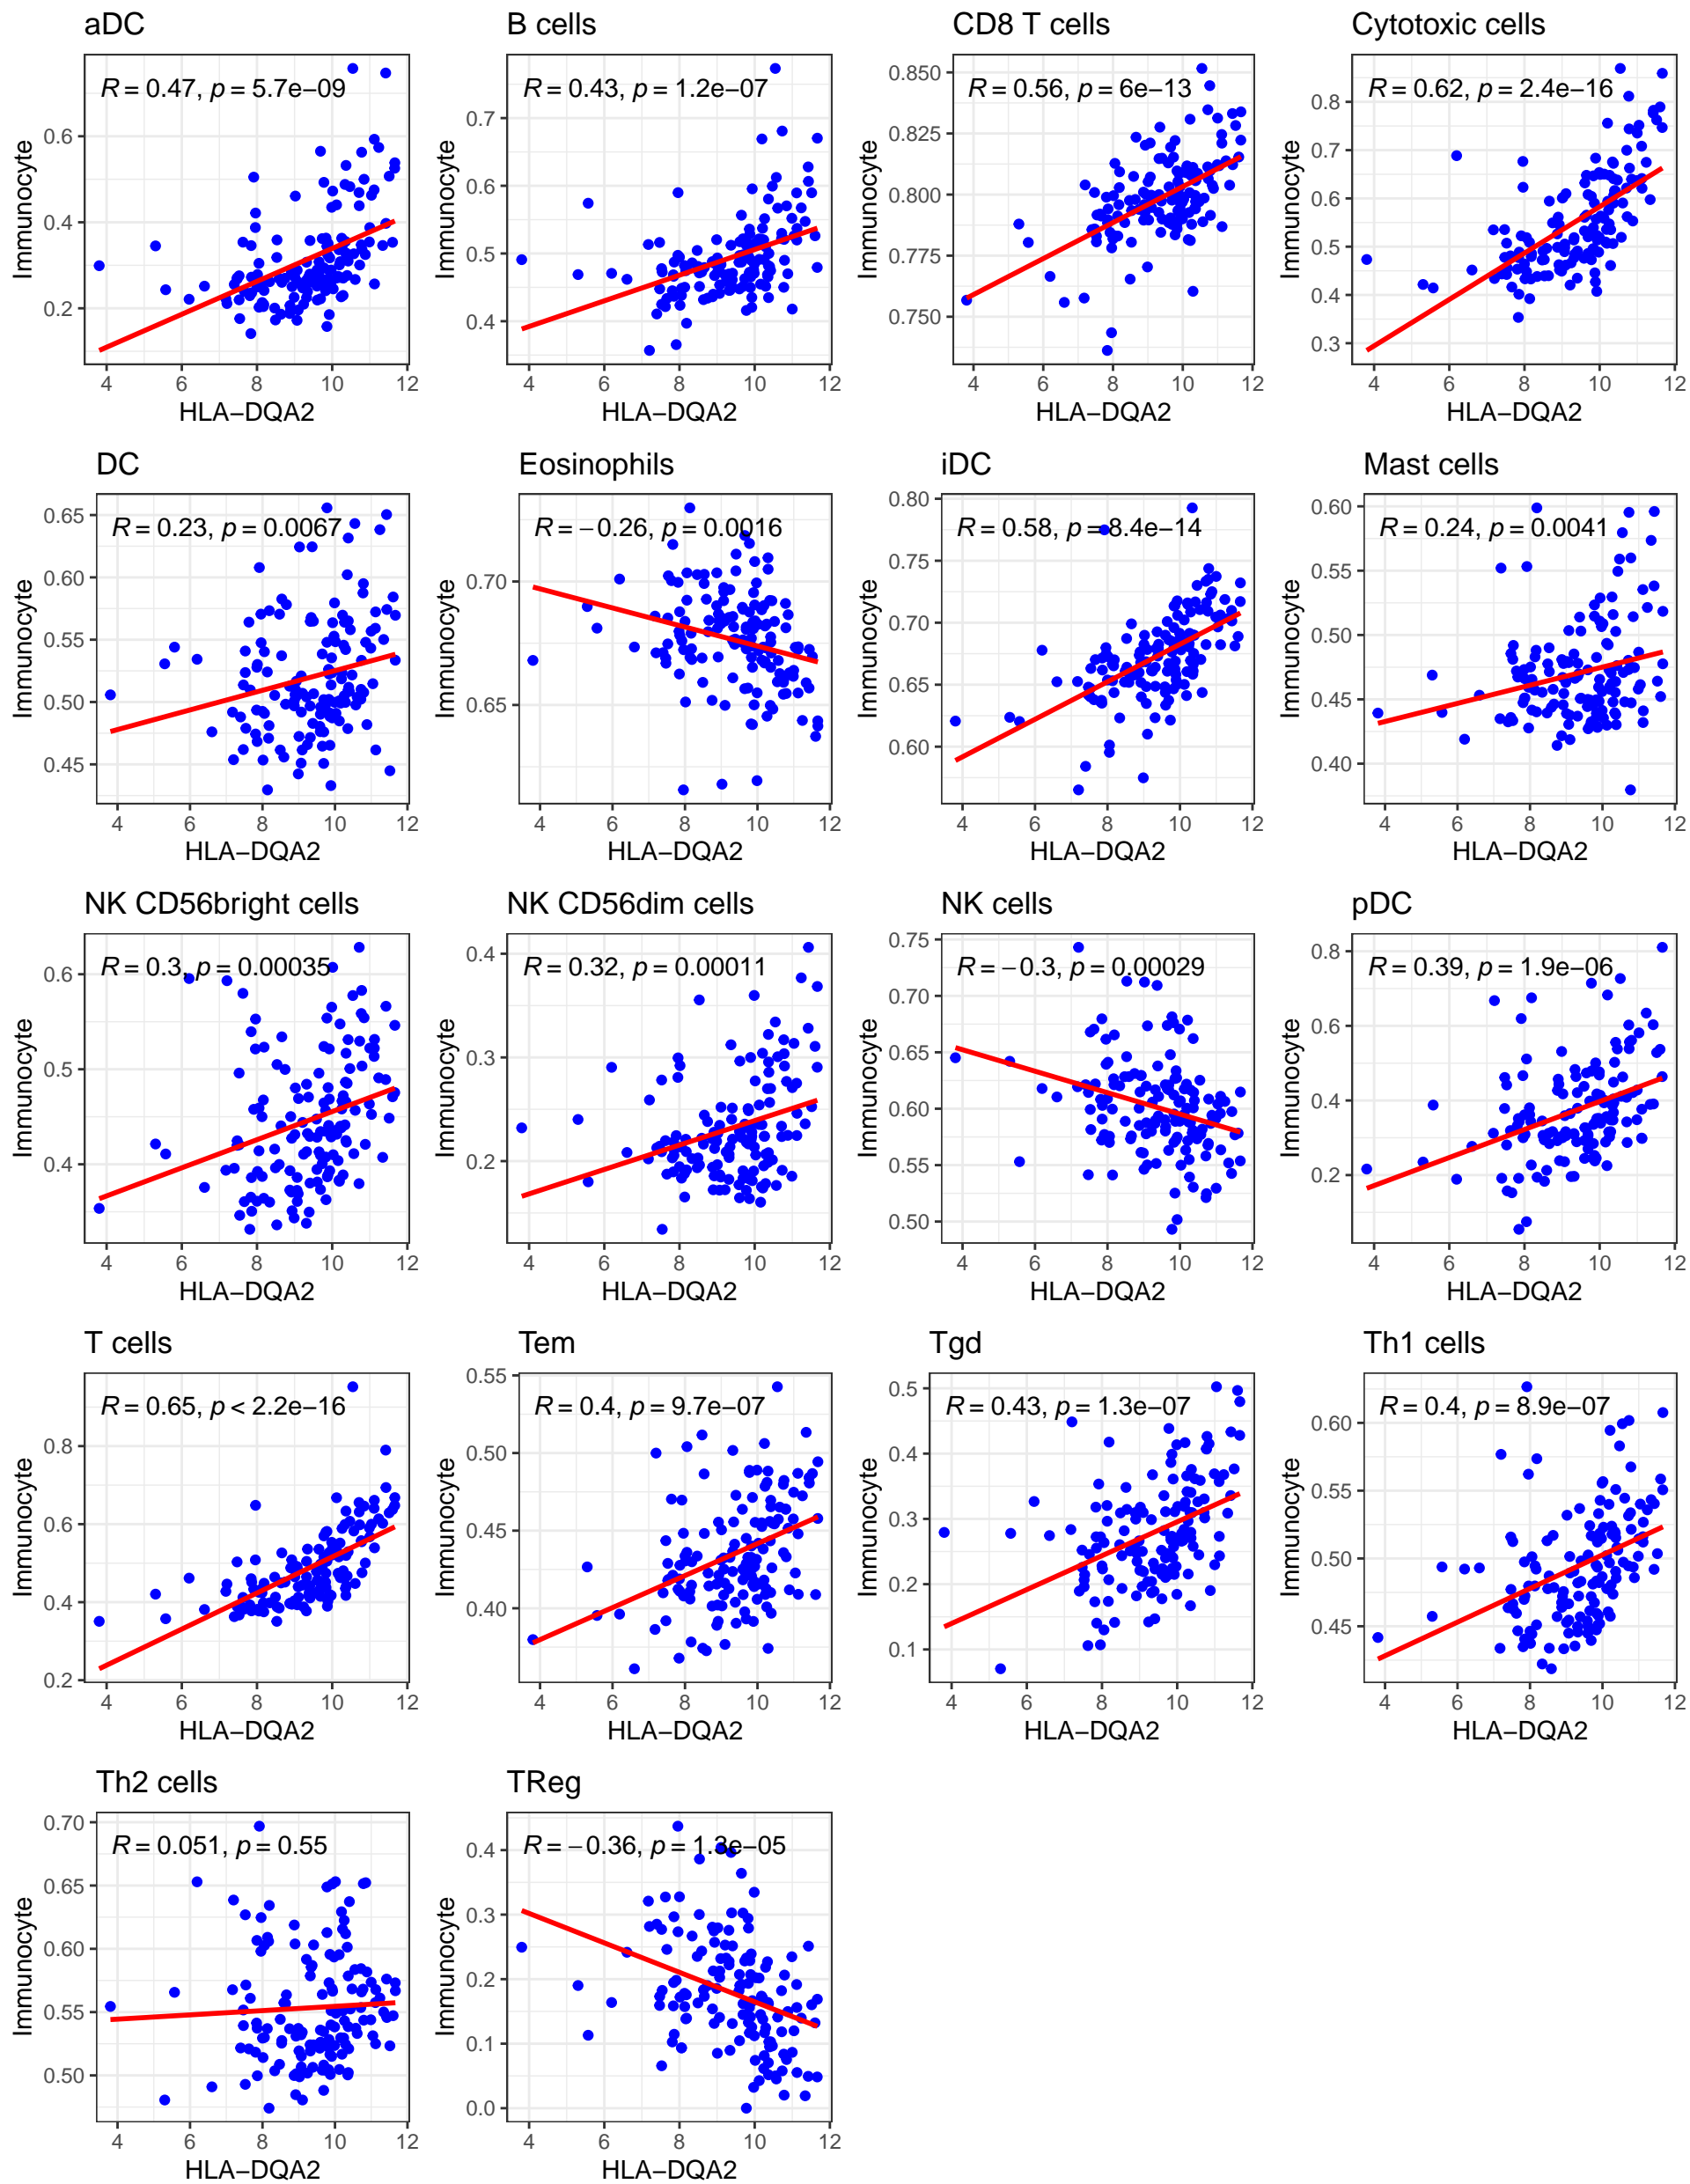

Supplement: f1 [file 7212852.f1.zip]

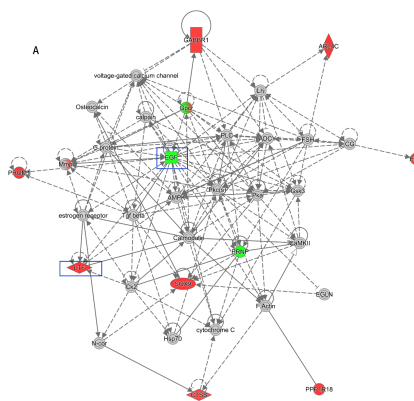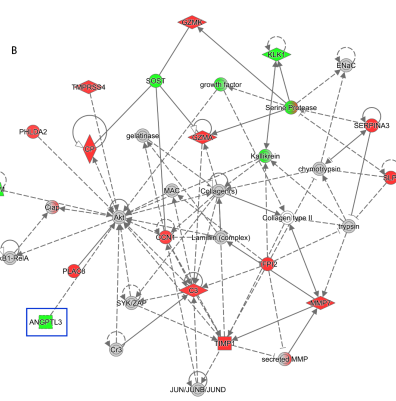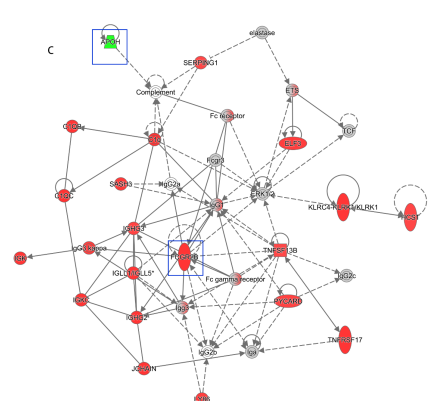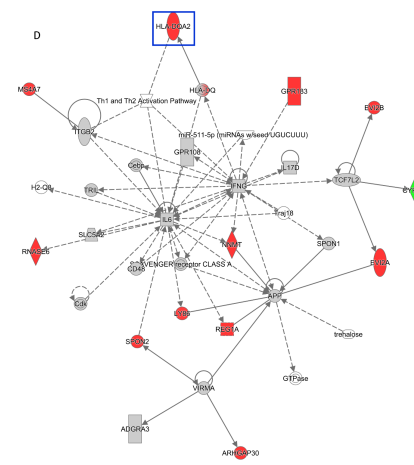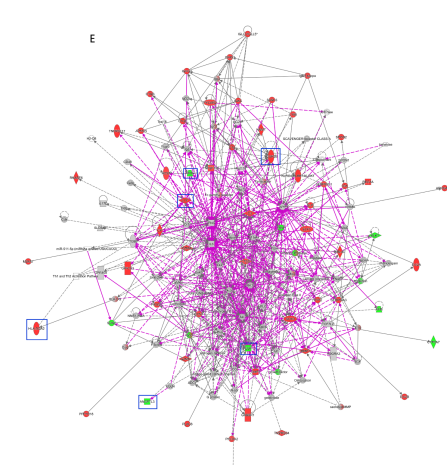

Supplement: f1 [file 7212852.f1.zip]
